# Supplementary material for: Stimulating Mitochondrial Biogenesis with Deoxyribonucleosides Increases Functional Capacity in ECHS1-Deficient Cells
Source: MDPI journal article supplement (doi:10.3390/ijms232012610), 2022-10-20
Supplement: s1 [file s1]

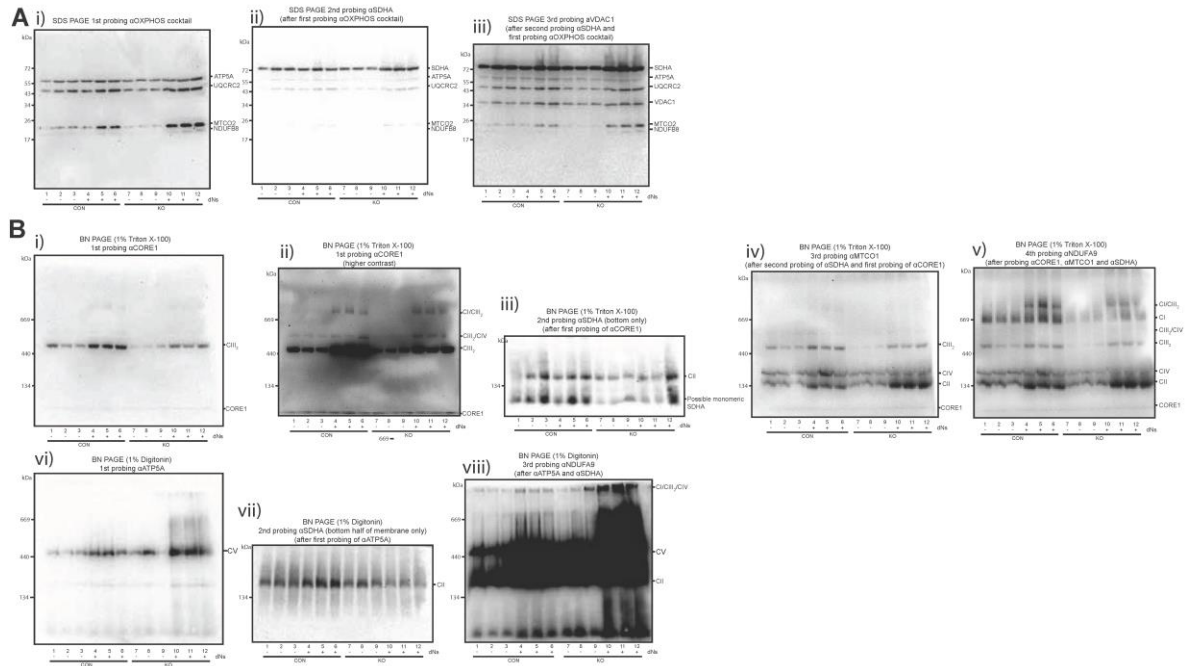

**Figure S1. (A)** SDS PAGE was transferred to PVDF membrane via Western blot before being probed with antibodies against OXPHOS cocktail (i), SDHA (ii) and VDAC1 (iii). **(B)** BN PAGE (1% Triton X-100 solubilised samples) was transferred to PVDF membrane via Western blot and probed with antibodies against CORE1 (CIII2, CIII2/CIV, i and ii), SDHA (CII, iii), MTCO1 (CIV, iv) and NDUFA9 (CI, v). BN PAGE (1% Digitonin solubilised samples) was transferred to PVDF membrane via Western blot and probed with antibodies against ATP5A (CV, vi), SDHA (CII, vii) and NDUFA9 (CI/CIII2/CIV, viii). Images shown are representative of three independent experiments.
