# Supplementary material for: Stimulating Mitochondrial Biogenesis with Deoxyribonucleosides Increases Functional Capacity in ECHS1-Deficient Cells
Source: Int J Mol Sci. 2022 Oct 20;23(20):12610. doi: 10.3390/ijms232012610 (PMC9604038; doi:10.3390/ijms232012610)
Supplement: Supplementary file 1 [file ijms-23-12610-s001.zip › ijms-1955262-supplementary.xlsx]

## Sheet: S1- dge CON ut vs KO ut
Name	baseMean2	log2FoldChange	lfcSE	stat	pvalue	padj	CON_A	CON_B	CON_C	CON_D	KO_A	KO_B	KO_C	KO_D
ENSG00000172927.8 MYEOV	928.03	4.05793	0.0905625	44.808	0	0	9.04552	9.07013	9.08571	9.0964	11.1656	11.1847	11.1417	11.2102
ENSG00000167772.12 ANGPTL4	14717.3	3.59152	0.0856872	41.9143	0	0	11.509	11.4149	11.5876	11.3315	14.9641	14.8167	14.5944	14.6413
ENSG00000107551.21 RASSF4	1224.39	3.07816	0.0812402	37.8896	0	0	9.5146	9.52297	9.55702	9.51851	11.5403	11.4541	11.3206	11.3945
ENSG00000272405.1 AL365181.3	839.047	2.99018	0.0786165	38.035	0	0	9.37518	9.28283	9.34247	9.37252	10.9935	11.0137	10.9852	11.0083
ENSG00000165507.9 DEPP1	3368.75	2.85046	0.0522246	54.5807	0	0	10.4393	10.4166	10.4393	10.3205	12.6799	12.6758	12.6381	12.675
ENSG00000166920.13 C15orf48	2293.56	2.68753	0.064599	41.6033	0	0	10.0918	10.1408	10.2177	10.1635	12.1867	12.1512	12.0535	12.2125
ENSG00000221869.5 CEBPD	3322.88	2.59936	0.0497711	52.2263	0	0	10.4959	10.5343	10.5922	10.5136	12.6611	12.6258	12.6068	12.5811
ENSG00000154146.13 NRGN	1528.81	2.28366	0.0600431	38.0337	0	0	10.0258	9.94378	10.0567	10.0363	11.6119	11.6296	11.5932	11.5736
ENSG00000182022.18 CHST15	3328.44	2.18451	0.0437957	49.8795	0	0	10.7405	10.784	10.7823	10.7875	12.5611	12.5833	12.5654	12.534
ENSG00000090339.9 ICAM1	8426.02	2.13707	0.0421343	50.7204	0	0	11.8331	11.8639	11.8875	11.8265	13.87	13.8124	13.7643	13.7762
ENSG00000138080.14 EMILIN1	6299.05	2.08852	0.0483164	43.2258	0	0	11.4927	11.5279	11.533	11.5879	13.468	13.4217	13.3672	13.3309
ENSG00000168528.12 SERINC2	4459.48	1.93736	0.0495824	39.0735	0	0	11.1961	11.2464	11.2625	11.2349	12.9643	12.9498	12.8569	12.8393
ENSG00000116016.14 EPAS1	16685.1	1.88759	0.0496555	38.0137	0	0	12.8655	12.8684	12.9146	12.983	14.7893	14.7523	14.6756	14.6321
ENSG00000196562.14 SULF2	4688.75	1.79567	0.0460405	39.0019	0	0	11.3894	11.4212	11.3492	11.3589	12.8894	12.9103	12.9749	12.9919
ENSG00000099875.16 MKNK2	5196.7	1.6468	0.0435241	37.8364	0	0	11.5903	11.6343	11.6072	11.5378	13.0754	13.0247	13.0787	13.0113
ENSG00000166250.12 CLMP	20860.4	-1.67464	0.0397766	-42.1013	0	0	14.918	14.9658	15.0112	15.032	13.333	13.3451	13.3966	13.3799
ENSG00000125538.12 IL1B	9573	-1.92591	0.0457459	-42.1003	0	0	13.8965	13.927	14.0074	13.9407	12.1426	12.1147	12.1358	12.235
ENSG00000213658.12 LAT	3508.04	-2.32786	0.0582655	-39.9527	0	0	12.6828	12.6442	12.742	12.5327	10.7611	10.7395	10.7163	10.7578
ENSG00000164949.8 GEM	1954.18	-2.37232	0.0565928	-41.9192	0	0	11.8502	11.9065	11.9145	11.9743	10.1823	10.165	10.1556	10.1982
ENSG00000105825.14 TFPI2	10749	-2.75838	0.0645077	-42.7605	0	0	14.1736	14.1295	14.272	14.3671	11.6565	11.6326	11.722	11.8063
ENSG00000146197.9 SCUBE3	7326.29	-2.78773	0.0674659	-41.3206	0	0	13.775	13.7272	13.6226	13.7093	11.1012	11.1979	11.273	11.3666
ENSG00000049192.15 ADAMTS6	1232.56	-3.32031	0.0735209	-45.1615	0	0	11.429	11.482	11.4706	11.4399	9.51444	9.44489	9.38956	9.43903
ENSG00000184254.17 ALDH1A3	9611.58	-3.57708	0.0577839	-61.9044	0	0	14.1019	14.1275	14.1689	14.2457	11.1075	10.992	10.9442	10.9451
ENSG00000196611.6 MMP1	147626	-3.72526	0.092541	-40.2552	0	0	18.0664	17.9915	18.1951	18.0168	14.0974	14.2583	14.5399	14.5777
ENSG00000172572.7 PDE3A	1574.25	-3.85429	0.0926037	-41.6214	0	0	11.6751	11.7642	11.7292	11.9449	9.44827	9.32756	9.41866	9.34887
ENSG00000170961.7 HAS2	3615.44	-4.32246	0.0852007	-50.7327	0	0	12.7158	12.8072	12.9256	13.0078	9.59995	9.72998	9.74412	9.75204
ENSG00000166670.10 MMP10	3155.58	-6.12069	0.102158	-59.9142	0	0	12.7374	12.6828	12.8527	12.6548	8.90122	8.95837	9.04342	9.08578
ENSG00000197632.9 SERPINB2	2195.93	-8.16897	0.198496	-41.1544	0	0	12.2664	12.1248	12.4679	12.2242	8.56942	8.44631	8.55975	8.6041
ENSG00000137880.6 GCHFR	1024.5	2.86756	0.0768425	37.3173	8.59603e-305	7.48388e-302	9.4643	9.45912	9.58194	9.49757	11.2215	11.1562	11.1932	11.2561
ENSG00000158270.12 COLEC12	7012.35	1.50586	0.0404745	37.205	5.65776e-303	4.76157e-300	11.9965	12.0325	12.0507	12.1076	13.433	13.4243	13.397	13.4283
ENSG00000013588.9 GPRC5A	3346.69	1.68674	0.0455851	37.002	1.06324e-299	8.65957e-297	11.0697	11.0481	11.0276	11.1195	12.4821	12.5049	12.474	12.4391
ENSG00000140564.13 FURIN	7871.74	-1.39075	0.0381554	-36.4497	6.95234e-291	5.4854e-288	13.5666	13.5757	13.5266	13.5283	12.24	12.3199	12.2506	12.26
ENSG00000011638.11 TMEM159	1576.55	-2.15334	0.0593481	-36.2831	2.9876e-288	2.28578e-285	11.6791	11.5696	11.6266	11.6044	10.0984	10.0536	10.1073	10.1357
ENSG00000115758.13 ODC1	6459.59	-2.38911	0.0660509	-36.1708	1.75039e-286	1.29982e-283	13.4736	13.4063	13.6524	13.3802	11.387	11.3281	11.324	11.4199
ENSG00000164251.5 F2RL1	7478.22	-1.69394	0.0472903	-35.8199	5.40489e-281	3.89893e-278	13.5176	13.5174	13.6314	13.5432	11.9758	11.9875	11.9759	12.0781
ENSG00000188277.10 C15orf62	567.758	4.23285	0.11832	35.7747	2.73419e-280	1.91758e-277	8.87793	8.86886	8.75198	8.9038	10.6642	10.6881	10.6453	10.6673
ENSG00000081248.12 CACNA1S	684.441	5.35672	0.150455	35.6035	1.23826e-277	8.44963e-275	8.6634	8.66572	8.81245	8.68817	10.9478	10.8973	10.7783	10.9057
ENSG00000127152.18 BCL11B	1918.41	-2.42894	0.068663	-35.3748	4.16986e-274	2.77054e-271	11.8733	11.8243	11.888	12.0001	10.0748	10.1143	10.2063	10.1168
ENSG00000113361.13 CDH6	728.558	-4.03353	0.114955	-35.0879	1.03076e-269	6.673e-267	10.8327	10.8798	10.8823	11.0435	8.98879	9.03249	8.92092	9.02034
ENSG00000100985.7 MMP9	48120.9	-1.452	0.0414907	-34.9958	2.60692e-268	1.64549e-265	16.0949	16.0375	16.1895	16.1423	14.7094	14.6974	14.6636	14.6735
ENSG00000137265.15 IRF4	531.404	-4.06807	0.116967	-34.7797	4.93388e-265	3.03831e-262	10.6323	10.6258	10.5766	10.5443	8.80614	8.86108	8.87892	8.91805
ENSG00000161544.10 CYGB	1497.82	2.62584	0.0755204	34.7699	6.92784e-265	4.16462e-262	9.83504	9.88578	9.85213	9.81268	11.7387	11.6386	11.506	11.5938
ENSG00000140379.9 BCL2A1	748.425	-3.08486	0.0894144	-34.5007	7.82749e-261	4.59601e-258	10.9361	10.866	10.9269	10.8135	9.20158	9.27296	9.23694	9.30971
ENSG00000139438.6 FAM222A	658.916	-3.36165	0.0976396	-34.4292	9.23699e-260	5.30035e-257	10.7987	10.7995	10.737	10.7627	9.11987	9.11927	9.17962	9.03539
ENSG00000172081.14 MOB3A	4979.96	1.89503	0.0552424	34.304	6.84597e-258	3.84104e-255	11.3845	11.418	11.3451	11.3968	13.1273	13.1061	12.9709	12.9612
ENSG00000146555.19 SDK1	2288.61	2.28825	0.0668679	34.2205	1.19674e-256	6.56853e-254	10.3428	10.3479	10.2889	10.435	12.1509	12.1591	12.0885	11.9836
ENSG00000163235.16 TGFA	3074.17	2.60547	0.0764359	34.087	1.14773e-254	6.16552e-252	10.4006	10.3592	10.5645	10.4954	12.6461	12.5376	12.4495	12.4291
ENSG00000165424.7 ZCCHC24	2050.67	1.70651	0.0503865	33.8684	1.94614e-251	1.02367e-248	10.5366	10.5293	10.579	10.5705	11.855	11.9097	11.8313	11.8424
ENSG00000166923.12 GREM1	2223.06	-1.94537	0.0580727	-33.4988	5.01624e-246	2.58469e-243	11.9472	11.9828	11.9827	12.1018	10.5458	10.4645	10.5097	10.5088
ENSG00000147854.17 UHRF2	8386.78	-1.47551	0.0440729	-33.4789	9.78157e-246	4.9393e-243	13.5874	13.6308	13.6865	13.7268	12.2985	12.2605	12.3109	12.302
ENSG00000130508.11 PXDN	10442.2	1.54638	0.0466227	33.168	3.11254e-241	1.54089e-238	12.4704	12.5308	12.4909	12.6214	13.9676	14.0167	13.9982	13.9347
ENSG00000115677.17 HDLBP	17123.8	-1.28497	0.038882	-33.048	1.6617e-239	8.06821e-237	14.6312	14.5972	14.6452	14.5346	13.3917	13.3824	13.3457	13.3446
ENSG00000103742.12 IGDCC4	1645.61	1.75624	0.0531902	33.018	4.47396e-239	2.13129e-236	10.3097	10.3191	10.3068	10.365	11.5636	11.6077	11.6192	11.6235
ENSG00000142910.16 TINAGL1	4032.08	2.86207	0.0876435	32.6557	6.64064e-234	3.10487e-231	10.5447	10.5123	10.7066	10.4974	13.1015	12.9319	12.7502	12.8178
ENSG00000112902.12 SEMA5A	2367.04	-2.09341	0.0641227	-32.647	8.84478e-234	4.06024e-231	12.0507	12.1057	12.0384	12.2316	10.4325	10.5304	10.4922	10.5013
ENSG00000139973.16 SYT16	1495.65	-3.80401	0.117897	-32.2657	2.12236e-228	9.56882e-226	11.5775	11.7638	11.5025	11.9768	9.30764	9.39686	9.39649	9.4059
ENSG00000169436.17 COL22A1	4013.52	-1.99131	0.0622711	-31.9781	2.20119e-224	9.75009e-222	12.8112	12.7558	12.7234	12.8051	10.9876	11.0099	11.1438	11.1829
ENSG00000157227.14 MMP14	51609	1.10828	0.0348898	31.765	1.9683e-221	8.56823e-219	15.0161	15.0073	15.0788	14.9906	16.1056	16.1113	16.1549	16.0986
ENSG00000166140.17 ZFYVE19	2310.88	1.59072	0.050116	31.7408	4.25849e-221	1.82235e-218	10.7105	10.7347	10.7509	10.7333	11.9732	11.945	11.9624	12.0498
ENSG00000176485.13 PLAAT3	1014.3	3.34828	0.10551	31.7343	5.23266e-221	2.2019e-218	9.3653	9.36705	9.29975	9.26512	11.3716	11.2519	11.0418	11.2589
ENSG00000167244.21 IGF2	10616.5	1.82786	0.0579045	31.5668	1.05406e-218	4.36276e-216	12.4342	12.3938	12.2245	12.3704	14.0216	14.1455	14.0978	13.999
ENSG00000101443.18 WFDC2	3109.57	2.29289	0.0727121	31.5338	2.99188e-218	1.21837e-215	10.7112	10.6166	10.7295	10.5045	12.5676	12.5296	12.4226	12.4332
ENSG00000197324.9 LRP10	12255.2	1.08128	0.0343033	31.5213	4.4426e-218	1.78042e-215	13.0562	13.045	13.0301	13.0512	14.0823	14.1162	14.0483	14.0468
ENSG00000010438.17 PRSS3	3120.16	-2.48735	0.0790248	-31.4755	1.88075e-217	7.41958e-215	12.596	12.5277	12.6399	12.3022	10.5014	10.5437	10.5043	10.5944
ENSG00000151062.15 CACNA2D4	616.783	6.43825	0.205354	31.3519	9.16334e-216	3.55932e-213	8.57602	8.56067	8.4588	8.55034	10.8221	10.8282	10.7367	10.771
ENSG00000026559.14 KCNG1	4124.84	-1.58814	0.050723	-31.31	3.41025e-215	1.30457e-212	12.7217	12.7462	12.7758	12.662	11.2931	11.3694	11.3408	11.4272
ENSG00000100234.12 TIMP3	4000.18	1.43142	0.0459621	31.1434	6.2228e-213	2.34497e-210	11.3436	11.406	11.4515	11.4628	12.6451	12.6279	12.6513	12.6713
ENSG00000102359.9 SRPX2	2110.66	1.68233	0.0546338	30.7929	3.26017e-208	1.21048e-205	10.6161	10.5519	10.5826	10.6233	11.9536	11.8571	11.8379	11.9112
ENSG00000141753.7 IGFBP4	9731.48	1.75417	0.0570608	30.7422	1.5556e-207	5.69216e-205	12.2308	12.2712	12.3862	12.298	14.0291	13.9345	13.8139	13.9345
ENSG00000103485.19 QPRT	419.976	-3.81791	0.124743	-30.6061	1.01661e-205	3.66678e-203	10.3161	10.3659	10.4067	10.3571	8.88939	8.88854	8.78868	8.85281
ENSG00000102181.21 CD99L2	2674.11	1.53976	0.0503371	30.5891	1.71119e-205	6.08507e-203	10.8695	10.919	10.891	10.9545	12.1885	12.1687	12.0905	12.1725
ENSG00000184922.14 FMNL1	3554.08	1.62621	0.0532112	30.5614	3.99316e-205	1.40027e-202	11.1422	11.215	11.1865	11.1272	12.5996	12.5901	12.5038	12.4624
ENSG00000116852.15 KIF21B	2934.36	1.64184	0.053859	30.4841	4.23828e-204	1.46586e-201	10.9382	10.9242	10.8976	11.0381	12.3279	12.3329	12.2687	12.2538
ENSG00000182768.9 NGRN	6550.72	-1.6421	0.0539455	-30.44	1.62429e-203	5.54191e-201	13.3955	13.2978	13.4543	13.2868	11.8569	11.8586	11.8364	11.946
ENSG00000175899.15 A2M	642.322	2.62632	0.0867667	30.2687	2.95826e-201	9.95868e-199	9.34014	9.28577	9.35971	9.29753	10.6675	10.7198	10.739	10.6318
ENSG00000133816.17 MICAL2	2986.01	-1.61057	0.0533883	-30.1671	6.39711e-200	2.12519e-197	12.2706	12.3106	12.2963	12.3629	11.0337	11.0443	10.9183	10.9593
ENSG00000172331.12 BPGM	913.09	-2.19207	0.072684	-30.1588	8.21582e-200	2.69394e-197	10.9536	11.0228	11.0466	11.0043	9.64025	9.62548	9.72288	9.70247
ENSG00000100558.9 PLEK2	12969.8	-1.92087	0.0641363	-29.9499	4.41845e-197	1.43022e-194	14.3489	14.3284	14.4902	14.2885	12.6659	12.578	12.4194	12.5371
ENSG00000115756.13 HPCAL1	5209.16	1.49615	0.0500273	29.9067	1.61036e-196	5.14663e-194	11.6546	11.6691	11.7971	11.631	13.0296	13.0121	12.9855	13.0346
ENSG00000125430.9 HS3ST3B1	1432.98	-1.86458	0.0623605	-29.9001	1.96204e-196	6.19219e-194	11.4356	11.4366	11.4769	11.4976	10.0901	10.1124	10.2088	10.1886
ENSG00000175352.11 NRIP3	4352.7	-1.49288	0.0500446	-29.831	1.54899e-195	4.82826e-193	12.7765	12.7587	12.8525	12.7127	11.4496	11.4417	11.4737	11.541
ENSG00000137745.12 MMP13	413.143	-3.59565	0.12098	-29.7209	4.1191e-194	1.26828e-191	10.3086	10.3648	10.3171	10.3673	8.77782	8.91482	8.91464	8.91805
ENSG00000131981.16 LGALS3	9418.68	1.78512	0.0601814	29.6624	2.34841e-193	7.14371e-191	12.2907	12.1784	12.3278	12.1333	13.9937	13.8724	13.813	13.8806
ENSG00000185985.11 SLITRK2	367.853	-3.66923	0.124028	-29.5838	2.41148e-192	7.24823e-190	10.2293	10.2765	10.2413	10.2126	8.82645	8.80194	8.83379	8.87692
ENSG00000125571.9 IL37	752.04	2.32558	0.0795542	29.2326	7.46291e-188	2.21675e-185	9.50818	9.47847	9.55982	9.48575	10.7671	10.7978	10.8117	10.8909
ENSG00000150995.20 ITPR1	5281.54	-1.36782	0.0467939	-29.2308	7.87591e-188	2.31222e-185	13.0286	12.9842	12.9281	13.063	11.7595	11.8316	11.7887	11.7564
ENSG00000153162.9 BMP6	598.837	-2.47692	0.0848961	-29.1759	3.91817e-187	1.13708e-184	10.5698	10.6469	10.5838	10.6233	9.37093	9.28494	9.30793	9.35396
ENSG00000137033.11 IL33	594.235	-6.56719	0.225226	-29.1583	6.56106e-187	1.88243e-184	10.6161	10.6378	10.8619	10.8747	8.4876	8.50263	8.5314	8.55944
ENSG00000137936.18 BCAR3	5407.6	1.28505	0.044339	28.9823	1.10054e-184	3.12206e-182	11.8573	11.8631	11.8804	11.8485	13.0794	13.0313	12.9469	12.9869
ENSG00000170448.12 NFXL1	1283	-1.97722	0.068335	-28.9342	4.43704e-184	1.24474e-181	11.3682	11.3456	11.3568	11.3409	9.90535	10.0281	10.0843	10.0186
ENSG00000103888.17 CEMIP	32671.9	1.41096	0.04889	28.8599	3.80945e-183	1.05693e-180	14.1019	14.1149	14.1641	14.2974	15.5603	15.5727	15.548	15.5319
ENSG00000107554.17 DNMBP	4560.88	1.92088	0.0668672	28.7268	1.76725e-181	4.84996e-179	11.2134	11.268	11.2757	11.3226	13.0682	12.9858	12.8384	12.8143
ENSG00000152128.13 TMEM163	825.74	2.14907	0.0748787	28.7007	3.7357e-181	1.01418e-178	9.59068	9.58741	9.66608	9.66646	10.9257	10.9306	10.8568	10.8572
ENSG00000160213.9 CSTB	4215.63	-1.89127	0.0660361	-28.64	2.13837e-180	5.74357e-178	12.886	12.7732	12.9294	12.6762	11.2507	11.2368	11.1667	11.1487
ENSG00000129667.13 RHBDF2	3180.85	1.42929	0.0500468	28.559	2.17094e-179	5.76968e-177	11.1859	11.1877	11.1232	11.1298	12.3832	12.3964	12.3479	12.2741
ENSG00000117298.16 ECE1	12390.5	1.1402	0.0399253	28.5584	2.20807e-179	5.80722e-177	12.9695	13.0417	13.0081	13.0711	14.1352	14.1373	14.0862	14.0678
ENSG00000128918.15 ALDH1A2	702.729	2.66692	0.0934515	28.538	3.96144e-179	1.03112e-176	9.3653	9.31461	9.33549	9.40144	10.7831	10.6761	10.7832	10.8902
ENSG00000132182.12 NUP210	2049.97	1.88775	0.0665393	28.3704	4.68474e-177	1.20694e-174	10.454	10.4101	10.4526	10.5226	11.9967	11.9318	11.8103	11.8301
ENSG00000127507.18 ADGRE2	570.473	2.73206	0.0963655	28.351	8.13094e-177	2.07364e-174	9.25186	9.22825	9.19131	9.23769	10.692	10.5542	10.5472	10.5367
ENSG00000135862.6 LAMC1	27227.7	1.4038	0.049563	28.3235	1.77455e-176	4.48037e-174	13.8698	13.883	13.9039	14.0292	15.3388	15.3341	15.2749	15.2169
ENSG00000111799.22 COL12A1	4651.91	1.98921	0.070344	28.2782	6.39971e-176	1.5998e-173	11.1677	11.2089	11.1709	11.4358	12.9832	12.966	12.9843	12.9457
ENSG00000261115.6 TMEM178B	1022.53	2.21356	0.0783785	28.2419	1.79125e-175	4.43387e-173	9.73877	9.75111	9.63269	9.84562	11.1513	11.1392	11.1261	11.1129
ENSG00000215183.5 MSMP	2975.41	5.27333	0.18676	28.2359	2.11925e-175	5.19485e-173	9.24339	9.24068	9.23553	9.20617	12.9891	12.7171	12.2828	12.4782
ENSG00000168685.15 IL7R	919.797	2.45294	0.0869451	28.2125	4.10844e-175	9.97403e-173	9.49955	9.64406	9.55982	9.63187	10.9816	11.0081	11.0409	11.1475
ENSG00000107159.13 CA9	655.108	-3.55917	0.12669	-28.0935	1.17539e-173	2.82631e-171	10.8688	10.7667	10.8804	10.5791	9.13267	9.04855	8.99475	9.08578
ENSG00000100106.22 TRIOBP	3322.82	1.22261	0.0435699	28.061	2.93325e-173	6.98668e-171	11.3607	11.3034	11.2691	11.3502	12.3557	12.3432	12.3657	12.3542
ENSG00000115844.11 DLX2	376.662	-3.10745	0.110833	-28.0373	5.70136e-173	1.34531e-170	10.2453	10.2644	10.1969	10.2126	9.00402	8.94622	8.94845	8.9525
ENSG00000130066.16 SAT1	4815.82	-1.19962	0.0429922	-27.9032	2.44297e-171	5.71111e-169	12.8334	12.8083	12.8721	12.8211	11.7211	11.7584	11.7751	11.8286
ENSG00000184916.9 JAG2	843.456	2.10563	0.0756376	27.8384	1.48755e-170	3.44565e-168	9.6964	9.65828	9.66608	9.60465	10.9583	10.9523	10.8768	10.8492
ENSG00000148926.10 ADM	3860.46	1.97043	0.0711328	27.7007	6.85483e-169	1.57337e-166	11.1008	11.0514	11.1544	10.9058	12.8138	12.7356	12.6282	12.6896
ENSG00000171873.8 ADRA1D	495.068	2.64163	0.0954027	27.6892	9.41387e-169	2.14127e-166	9.17239	9.18658	9.19131	9.19972	10.4428	10.4951	10.3705	10.4531
ENSG00000197006.14 METTL9	6195.16	-1.62675	0.0588523	-27.6413	3.5504e-168	8.00363e-166	13.1908	13.216	13.3316	13.3778	11.7496	11.7732	11.8651	11.8712
ENSG00000149090.12 PAMR1	449.008	-2.98847	0.108195	-27.6212	6.18685e-168	1.38235e-165	10.3637	10.3682	10.4684	10.3135	8.99898	9.05907	9.08659	9.06101
ENSG00000185043.12 CIB1	12993	-1.95979	0.0713706	-27.4593	5.37829e-166	1.19115e-163	14.4729	14.381	14.4802	14.1471	12.5784	12.5331	12.4495	12.5433
ENSG00000119699.8 TGFB3	345.347	-3.61944	0.131868	-27.4475	7.44315e-166	1.63413e-163	10.1545	10.1842	10.2491	10.149	8.80614	8.78611	8.88225	8.80671
ENSG00000187957.8 DNER	1647.73	-1.75112	0.0644215	-27.1822	1.05393e-162	2.29392e-160	11.6151	11.512	11.6351	11.647	10.3801	10.3651	10.2615	10.3157
ENSG00000108417.4 KRT37	519.021	-3.32993	0.12355	-26.952	5.40197e-160	1.16572e-157	10.6023	10.5194	10.6112	10.4049	8.91856	9.03788	9.03553	9.09959
ENSG00000116514.17 RNF19B	1538.75	-1.46606	0.054414	-26.9427	6.94306e-160	1.48558e-157	11.4895	11.4665	11.4981	11.412	10.3774	10.3876	10.4271	10.4082
ENSG00000125845.7 BMP2	1577.73	-1.54044	0.0572095	-26.9264	1.07856e-159	2.28835e-157	11.4772	11.5047	11.5031	11.5628	10.3707	10.3529	10.4476	10.3764
ENSG00000115602.17 IL1RL1	299.13	-4.33897	0.161286	-26.9023	2.06164e-159	4.33769e-157	10.0776	10.1381	10.115	10.0245	8.63468	8.64762	8.70812	8.67299
ENSG00000198814.13 GK	477.403	-2.96219	0.110576	-26.7887	4.37448e-158	9.12784e-156	10.3751	10.3926	10.5046	10.4593	9.08019	9.0105	9.06659	9.17146
ENSG00000239713.9 APOBEC3G	3951.4	1.50727	0.0568065	26.5335	3.98416e-155	8.24525e-153	11.3992	11.2835	11.4521	11.2894	12.6843	12.6342	12.6017	12.6834
ENSG00000154237.13 LRRK1	2032.96	-1.47104	0.055487	-26.5114	7.17012e-155	1.4718e-152	11.8213	11.7711	11.7371	11.8642	10.6577	10.6999	10.6862	10.618
ENSG00000188549.12 CCDC9B	1008.84	2.36686	0.0894112	26.4716	2.05917e-154	4.19273e-152	9.64105	9.74739	9.6222	9.68828	11.22	11.1946	10.9847	11.138
ENSG00000272068.1 AL365181.2	445.111	2.98095	0.112752	26.4381	4.99936e-154	1.00979e-151	8.98495	9.0066	9.07145	9.14626	10.4118	10.3741	10.3436	10.349
ENSG00000255248.9 MIR100HG	1114.76	-2.09395	0.0793686	-26.3825	2.17374e-153	4.35575e-151	11.1317	11.2204	11.1599	11.3254	9.81379	9.86257	9.92262	9.81767
ENSG00000074660.16 SCARF1	597.206	2.51083	0.0951841	26.3786	2.40915e-153	4.78947e-151	9.27681	9.29452	9.41608	9.29172	10.5493	10.566	10.6362	10.669
ENSG00000157064.11 NMNAT2	2364.49	1.54995	0.0588751	26.326	9.65422e-153	1.90429e-150	10.7405	10.7072	10.774	10.877	12.0092	12.0387	11.9563	12.0075
ENSG00000118257.17 NRP2	7001.9	-1.51232	0.0574787	-26.3109	1.43794e-152	2.81435e-150	13.3921	13.4229	13.3825	13.4829	11.9074	12.0232	12.1077	12.114
ENSG00000149115.14 TNKS1BP1	4516.95	-1.24632	0.047481	-26.2488	7.38235e-152	1.43377e-149	12.8263	12.7133	12.7284	12.7737	11.7084	11.6958	11.6531	11.6143
ENSG00000205922.5 ONECUT3	687.024	1.98244	0.0757752	26.1621	7.17794e-151	1.38343e-148	9.57871	9.5568	9.51995	9.61939	10.6479	10.6916	10.7083	10.6823
ENSG00000106123.12 EPHB6	2231.86	-1.67975	0.0645208	-26.0343	2.02607e-149	3.87532e-147	11.908	11.9877	11.9831	11.9506	10.7109	10.7222	10.5374	10.6352
ENSG00000130294.18 KIF1A	5115.7	1.265	0.04882	25.9115	4.93982e-148	9.37748e-146	11.7881	11.8122	11.7423	11.8789	12.9577	12.9833	12.9083	12.878
ENSG00000152952.12 PLOD2	5990.88	1.50913	0.0582989	25.8861	9.54147e-148	1.79778e-145	11.7646	11.7856	11.8517	11.9893	13.1866	13.1981	13.2398	13.2044
ENSG00000125931.11 CITED1	539.709	-2.71692	0.105499	-25.7531	2.97915e-146	5.57168e-144	10.591	10.4788	10.6041	10.4371	9.16582	9.16615	9.19916	9.28265
ENSG00000135046.14 ANXA1	1371.14	2.62905	0.102145	25.7384	4.34414e-146	8.06477e-144	9.69999	9.75482	9.86706	9.80385	11.7094	11.5124	11.3162	11.5036
ENSG00000172164.15 SNTB1	1903.52	1.72266	0.067015	25.7056	1.01321e-145	1.86726e-143	10.3833	10.4778	10.4724	10.5647	11.7038	11.7468	11.8448	11.7881
ENSG00000188522.15 FAM83G	3626.27	-1.16469	0.0453132	-25.7032	1.07724e-145	1.97089e-143	12.5079	12.4432	12.4584	12.3954	11.4286	11.4368	11.4753	11.4746
ENSG00000102755.12 FLT1	6782.91	-1.77077	0.0692253	-25.5798	2.56144e-144	4.65261e-142	13.3541	13.3539	13.4572	13.5699	11.7074	11.855	11.9459	11.8155
ENSG00000135678.12 CPM	569.154	-2.12571	0.083173	-25.5577	4.5048e-144	8.12408e-142	10.4855	10.4705	10.5522	10.5609	9.4363	9.40387	9.41866	9.38644
ENSG00000116679.16 IVNS1ABP	6268.2	-1.06829	0.0418009	-25.5565	4.64781e-144	8.32254e-142	13.104	13.1348	13.1777	13.1761	12.2365	12.1432	12.1597	12.1665
ENSG00000144355.15 DLX1	592.248	-2.14372	0.0839207	-25.5446	6.30791e-144	1.12156e-141	10.5502	10.5636	10.6065	10.5146	9.36122	9.42459	9.44034	9.47334
ENSG00000186340.17 THBS2	8348.15	1.24245	0.0487376	25.4926	2.38135e-143	4.20449e-141	12.3622	12.4076	12.4416	12.5315	13.6193	13.6244	13.5585	13.5562
ENSG00000114554.11 PLXNA1	14297.7	1.34665	0.0528406	25.4851	2.88121e-143	5.05172e-141	13.0945	13.1087	12.9498	13.1592	14.3708	14.4239	14.3595	14.3101
ENSG00000273706.5 LHX1	738.094	-1.88133	0.0739221	-25.4502	7.03077e-143	1.22423e-140	10.7904	10.7296	10.7132	10.7221	9.59995	9.70673	9.64447	9.65814
ENSG00000146678.10 IGFBP1	394.608	2.73638	0.107572	25.4376	9.67434e-143	1.673e-140	9.00827	9.09998	9.0997	9.05484	10.261	10.264	10.1868	10.2646
ENSG00000110987.9 BCL7A	1206.01	-1.60228	0.0631223	-25.3837	3.81309e-142	6.54918e-140	11.2447	11.2299	11.2344	11.1507	10.1084	10.1774	10.1476	10.0753
ENSG00000081181.8 ARG2	9684.09	-1.6019	0.0634094	-25.2628	8.1996e-141	1.39881e-138	13.9495	13.8345	14.0039	13.7534	12.3202	12.3486	12.4403	12.4619
ENSG00000133805.15 AMPD3	1399.48	1.44604	0.0573049	25.2341	1.69174e-140	2.86665e-138	10.2779	10.3727	10.3347	10.3123	11.3605	11.3911	11.3393	11.3179
ENSG00000005884.18 ITGA3	33108.2	1.67948	0.0666126	25.2126	2.91119e-140	4.90011e-138	13.9998	13.9755	14.0218	13.9904	15.8163	15.7013	15.5079	15.5105
ENSG00000184371.14 CSF1	2349.11	1.69884	0.0674377	25.1912	5.00133e-140	8.36249e-138	10.6903	10.6792	10.6867	10.7049	12.1453	12.0803	11.8952	11.9738
ENSG00000171130.18 ATP6V0E2	421.737	2.44248	0.0969875	25.1835	6.08052e-140	1.01001e-137	9.2027	9.15304	9.14024	9.17343	10.3156	10.2341	10.2672	10.2937
ENSG00000134955.12 SLC37A2	577.247	2.16703	0.0862262	25.1319	2.23057e-139	3.68088e-137	9.38252	9.40648	9.43521	9.40144	10.6125	10.5304	10.4739	10.5247
ENSG00000111961.18 SASH1	1865.13	-1.58383	0.0630273	-25.1293	2.37931e-139	3.90084e-137	11.695	11.6494	11.6892	11.8381	10.4879	10.525	10.553	10.5303
ENSG00000261371.6 PECAM1	445.539	2.2896	0.0912301	25.097	5.36873e-139	8.74514e-137	9.22907	9.27693	9.21572	9.21892	10.2972	10.3218	10.3291	10.2959
ENSG00000144136.11 SLC20A1	9033.78	1.37582	0.0549731	25.0271	3.10386e-138	5.02349e-136	12.4262	12.4475	12.4922	12.4491	13.8617	13.7593	13.6426	13.6672
ENSG00000141458.13 NPC1	15171.6	-0.926124	0.0370286	-25.011	4.64001e-138	7.46184e-136	14.3629	14.3038	14.3464	14.2725	13.3953	13.4441	13.4493	13.4404
ENSG00000066056.14 TIE1	2498.39	1.31926	0.0531497	24.8217	5.23358e-136	8.36313e-134	10.9616	10.9048	10.971	10.981	12.0925	12.0342	11.9683	11.9742
ENSG00000134901.13 POGLUT2	1548.04	-1.6845	0.0679623	-24.7857	1.27808e-135	2.0295e-133	11.4977	11.468	11.6373	11.4613	10.3612	10.2591	10.2768	10.319
ENSG00000092421.17 SEMA6A	1662.68	1.56756	0.0633695	24.7369	4.29035e-135	6.77018e-133	10.3771	10.4273	10.3789	10.5115	11.5113	11.6168	11.6198	11.5644
ENSG00000132535.21 DLG4	7734.01	-1.15057	0.0465281	-24.7285	5.27927e-135	8.27894e-133	13.5213	13.4422	13.5001	13.3671	12.3807	12.3679	12.4239	12.408
ENSG00000166439.6 RNF169	1375.49	-1.4945	0.0605211	-24.6939	1.24407e-134	1.9389e-132	11.3747	11.3428	11.2698	11.3836	10.2478	10.2755	10.3314	10.2893
ENSG00000135245.10 HILPDA	2324.95	2.01992	0.0822336	24.5633	3.12065e-133	4.83376e-131	10.5997	10.4921	10.5657	10.3751	12.175	12.1228	11.9234	12.0622
ENSG00000113070.8 HBEGF	700.906	-1.99396	0.0812893	-24.5292	7.21467e-133	1.11071e-130	10.7436	10.6667	10.7088	10.697	9.66227	9.49708	9.59172	9.55329
ENSG00000159784.18 FAM131B	573.556	1.94611	0.0795065	24.4773	2.57657e-132	3.94262e-130	9.47988	9.52068	9.42888	9.45681	10.4989	10.4978	10.4956	10.5173
ENSG00000164038.16 SLC9B2	661.003	-1.97588	0.0809786	-24.4	1.71134e-131	2.60289e-129	10.6032	10.6631	10.5898	10.7118	9.50042	9.58829	9.54071	9.5657
ENSG00000088340.17 FER1L4	697.397	2.35876	0.0967153	24.3887	2.25579e-131	3.41043e-129	9.53781	9.38565	9.41285	9.45436	10.7182	10.8569	10.7412	10.659
ENSG00000104613.12 INTS10	1581.33	-1.28773	0.0529496	-24.3199	1.20782e-130	1.81519e-128	11.4707	11.4341	11.4944	11.4307	10.483	10.545	10.4861	10.5293
ENSG00000135318.12 NT5E	6680.31	1.01531	0.0418063	24.2859	2.75986e-130	4.12314e-128	12.2232	12.2749	12.315	12.3421	13.2083	13.2435	13.2004	13.2207
ENSG00000221955.11 SLC12A8	370.684	-2.61778	0.108388	-24.1519	7.1377e-129	1.06008e-126	10.1147	10.2047	10.2209	10.187	9.06187	9.01606	9.06405	9.11984
ENSG00000162631.20 NTNG1	817.811	2.08893	0.0868946	24.0399	1.06553e-127	1.57325e-125	9.59464	9.65221	9.58194	9.7382	10.8037	10.8819	10.9591	10.8506
ENSG00000170873.19 MTSS1	6859.72	-1.13186	0.0471083	-24.0268	1.4581e-127	2.14035e-125	13.2498	13.2733	13.2637	13.3691	12.2102	12.2794	12.3075	12.2125
ENSG00000117676.14 RPS6KA1	2739.5	1.19068	0.0496129	23.9994	2.82381e-127	4.12114e-125	11.1434	11.1454	11.156	11.0456	12.0702	12.1073	12.084	12.1384
ENSG00000116574.6 RHOU	727.447	1.95616	0.0816599	23.955	8.19938e-127	1.18976e-124	9.60643	9.60238	9.59011	9.66044	10.8288	10.6531	10.71	10.7468
ENSG00000148219.18 ASTN2	434.874	2.38213	0.0995357	23.9324	1.41014e-126	2.03446e-124	9.1693	9.27693	9.19131	9.15314	10.2742	10.3328	10.3106	10.277
ENSG00000180884.10 ZNF792	440.351	2.1613	0.0904574	23.893	3.61744e-126	5.18938e-124	9.23483	9.28283	9.25107	9.29172	10.3086	10.2916	10.2599	10.287
ENSG00000161681.16 SHANK1	3171.99	-1.41617	0.0592811	-23.8891	3.97986e-126	5.67704e-124	12.3327	12.3502	12.2803	12.4115	11.0957	11.1814	11.2568	11.1044
ENSG00000159753.14 CARMIL2	1295.24	-1.52755	0.0640328	-23.8557	8.84233e-126	1.25422e-123	11.3212	11.2441	11.354	11.2013	10.2208	10.2035	10.2122	10.2428
ENSG00000198420.10 TCAF1	2214.13	1.06262	0.0445566	23.8488	1.04248e-125	1.47042e-123	10.9834	10.9499	10.971	10.9296	11.8069	11.7976	11.8027	11.8011
ENSG00000185046.18 ANKS1B	538.546	-2.15419	0.0903957	-23.8307	1.6054e-125	2.25184e-123	10.4626	10.4305	10.4339	10.5394	9.39949	9.43141	9.3341	9.33859
ENSG00000168621.15 GDNF	4190.98	1.1447	0.0480677	23.8144	2.3707e-125	3.30693e-123	11.6795	11.615	11.6463	11.6058	12.5779	12.6348	12.7115	12.61
ENSG00000122641.11 INHBA	1920.99	-2.20301	0.092638	-23.7809	5.2703e-125	7.31123e-123	11.7758	11.7763	11.8342	12.0628	10.1619	10.1471	10.3176	10.3276
ENSG00000183691.6 NOG	713.218	2.19189	0.0922718	23.7547	9.8324e-125	1.35655e-122	9.4643	9.45668	9.64565	9.5162	10.7978	10.7667	10.7243	10.6962
ENSG00000168385.18 SEPTIN2	5461.59	-1.01345	0.042753	-23.7048	3.21691e-124	4.41416e-122	12.8814	12.9314	12.9745	12.9978	12.0495	12.0103	12.0489	12.0323
ENSG00000003436.16 TFPI	4204.43	-1.44919	0.0611866	-23.6847	5.1866e-124	7.07845e-122	12.6304	12.7446	12.7258	12.7737	11.3289	11.4772	11.5131	11.5222
ENSG00000129521.15 EGLN3	1650.71	1.51343	0.0640507	23.6287	1.95686e-123	2.65628e-121	10.4912	10.3882	10.5148	10.3784	11.6217	11.541	11.5131	11.5565
ENSG00000164237.9 CMBL	3064.94	-1.11015	0.0470077	-23.6163	2.62049e-123	3.53808e-121	12.2076	12.186	12.2782	12.2088	11.2944	11.2637	11.2638	11.3407
ENSG00000197496.6 SLC2A10	725.818	1.65662	0.0701772	23.6062	3.32857e-123	4.4702e-121	9.70714	9.69791	9.71555	9.76234	10.6707	10.7198	10.6897	10.669
ENSG00000242247.11 ARFGAP3	2825.78	-1.25767	0.0533425	-23.5772	6.60191e-123	8.81931e-121	12.1345	12.1207	12.2185	12.1539	11.0279	11.1605	11.1443	11.1457
ENSG00000130429.15 ARPC1B	3628.62	-1.01192	0.0429643	-23.5525	1.18439e-122	1.57387e-120	12.4016	12.411	12.4628	12.357	11.5305	11.5449	11.5336	11.549
ENSG00000137573.14 SULF1	650.43	-2.39057	0.101537	-23.5438	1.45332e-122	1.92112e-120	10.6424	10.5761	10.6722	10.8135	9.42418	9.33885	9.3667	9.46883
ENSG00000115170.15 ACVR1	1823.13	-1.1413	0.0484873	-23.5382	1.65901e-122	2.1816e-120	11.5834	11.5691	11.6215	11.5852	10.7015	10.714	10.749	10.706
ENSG00000130227.17 XPO7	3308.83	-1.05479	0.0448459	-23.5203	2.52955e-122	3.30913e-120	12.2827	12.2777	12.3701	12.2775	11.3844	11.4306	11.41	11.4087
ENSG00000198729.5 PPP1R14C	544.845	-2.07896	0.0884177	-23.513	3.0064e-122	3.91266e-120	10.4384	10.4538	10.4737	10.5176	9.37093	9.44154	9.44855	9.33859
ENSG00000100364.19 KIAA0930	1954.06	-1.17768	0.0501433	-23.4862	5.64088e-122	7.30364e-120	11.6775	11.6551	11.7128	11.6763	10.8037	10.7934	10.7203	10.7733
ENSG00000105696.9 TMEM59L	775.497	1.83354	0.0781841	23.4516	1.2731e-121	1.63996e-119	9.7107	9.74925	9.70094	9.64011	10.8412	10.8109	10.7105	10.7663
ENSG00000133466.14 C1QTNF6	1026.79	1.51674	0.0646876	23.4472	1.41312e-121	1.81109e-119	10.0579	10.0317	9.98207	10.0479	11.0451	11.0752	10.9809	10.99
ENSG00000135424.18 ITGA7	3542.78	1.30894	0.055831	23.4447	1.49751e-121	1.90955e-119	11.3933	11.4107	11.3016	11.274	12.4072	12.5347	12.4255	12.4701
ENSG00000173221.14 GLRX	1633	1.2588	0.0536937	23.4441	1.52009e-121	1.9286e-119	10.5698	10.5529	10.5838	10.5126	11.4563	11.4979	11.462	11.5366
ENSG00000171408.14 PDE7B	254.264	-3.1876	0.136262	-23.3931	5.02576e-121	6.34452e-119	9.88186	9.88578	9.96072	9.93606	8.82645	8.78611	8.80031	8.85771
ENSG00000137642.13 SORL1	1056.76	1.92265	0.0823691	23.3419	1.66493e-120	2.09135e-118	9.80602	9.88247	9.84998	10.0008	11.1783	11.1697	11.0987	11.0512
ENSG00000157502.13 PWWP3B	1134.91	-2.32563	0.0997026	-23.3257	2.43109e-120	3.03862e-118	11.2145	11.2429	11.2352	11.3589	9.59738	9.78973	9.88817	9.78952
ENSG00000116106.12 EPHA4	600.063	-1.7384	0.0746545	-23.2859	6.15451e-120	7.65464e-118	10.5071	10.5133	10.5135	10.5236	9.54192	9.61417	9.55848	9.56364
ENSG00000163171.8 CDC42EP3	2313.97	1.28483	0.0553182	23.2261	2.48054e-119	3.07003e-117	10.8224	10.8905	10.8687	10.9832	11.9003	11.9314	11.934	11.8908
ENSG00000102038.16 SMARCA1	3677.9	1.34543	0.0581991	23.1176	3.07859e-118	3.79162e-116	11.3109	11.3257	11.343	11.4897	12.5239	12.4529	12.5288	12.5634
ENSG00000101680.15 LAMA1	4889.7	1.31704	0.0570064	23.1034	4.2819e-118	5.24802e-116	11.7079	11.7237	11.6407	11.8041	12.9751	12.9133	12.8382	12.8121
ENSG00000126562.17 WNK4	783.503	2.06541	0.0895268	23.0703	9.19478e-118	1.1215e-115	9.65047	9.57221	9.66355	9.60677	10.9416	10.8705	10.7462	10.7405
ENSG00000156453.14 PCDH1	1411.42	1.41819	0.061505	23.0581	1.22108e-117	1.4822e-115	10.4275	10.3456	10.2768	10.3205	11.3322	11.3903	11.3549	11.3494
ENSG00000149269.10 PAK1	3335.81	-1.05538	0.0458085	-23.039	1.89637e-117	2.29089e-115	12.3607	12.3008	12.3375	12.2511	11.4023	11.4067	11.4117	11.4492
ENSG00000043039.7 BARX2	434.022	-2.3706	0.10319	-22.9731	8.659e-117	1.04106e-114	10.3459	10.2753	10.3318	10.2214	9.1739	9.28494	9.16633	9.19001
ENSG00000162413.16 KLHL21	3490.82	-1.22274	0.0532394	-22.9668	1.00091e-116	1.19767e-114	12.4729	12.4081	12.4518	12.3367	11.3546	11.3939	11.4385	11.3211
ENSG00000132170.23 PPARG	2720.24	1.45079	0.0632359	22.9425	1.75105e-116	2.0854e-114	10.999	10.9205	11.0695	10.9088	12.2418	12.1807	12.0859	12.1122
ENSG00000164574.16 GALNT10	1956.35	1.32428	0.058328	22.704	4.0944e-114	4.85331e-112	10.6161	10.7107	10.7099	10.7611	11.7231	11.7317	11.6607	11.7587
ENSG00000106066.15 CPVL	1436.44	1.56641	0.0691022	22.668	9.27522e-114	1.0943e-111	10.2768	10.2885	10.3491	10.2561	11.5136	11.4313	11.3284	11.3488
ENSG00000115461.5 IGFBP5	20797	1.53429	0.0677157	22.6578	1.16898e-113	1.37276e-111	13.4043	13.4575	13.4206	13.5524	15.0957	14.9749	14.7586	14.9265
ENSG00000111058.8 ACSS3	856.768	1.48515	0.0655482	22.6574	1.17839e-113	1.3774e-111	9.89706	9.94535	9.86068	9.90722	10.8326	10.8548	10.8032	10.8129
ENSG00000186226.9 LCE1E	215.484	-4.00162	0.1768	-22.6336	2.02405e-113	2.35498e-111	9.75936	9.87583	9.8734	9.78779	8.69917	8.64762	8.62154	8.64384
ENSG00000159167.12 STC1	17003.5	-1.53812	0.0679632	-22.6317	2.11487e-113	2.44937e-111	14.6368	14.6362	14.6952	14.6733	13.0036	13.1565	13.3632	13.1855
ENSG00000165323.16 FAT3	284.138	-3.87069	0.1715	-22.5696	8.61674e-113	9.93404e-111	10.0231	9.94063	9.94891	10.1947	8.70764	8.81732	8.70348	8.71332
ENSG00000064225.12 ST3GAL6	1823.51	-2.16876	0.0965061	-22.4728	7.65571e-112	8.78597e-110	11.7153	11.788	11.7895	11.8964	10.049	10.129	10.3571	10.2893
ENSG00000146674.15 IGFBP3	55339.3	1.58792	0.0709108	22.3933	4.57838e-111	5.23055e-109	14.6781	14.7343	14.8631	14.8548	16.522	16.4017	16.2101	16.2533
ENSG00000071575.11 TRIB2	4417.79	1.03086	0.0460846	22.3688	7.92865e-111	9.01723e-109	11.7461	11.7416	11.7139	11.8508	12.6863	12.6775	12.6534	12.6663
ENSG00000237686.7 AL109615.3	394.814	2.25706	0.101011	22.3448	1.35763e-110	1.53711e-108	9.19972	9.19312	9.21572	9.13933	10.1917	10.2624	10.1441	10.2077
ENSG00000147905.18 ZCCHC7	1694.26	-1.18429	0.053055	-22.322	2.26201e-110	2.5496e-108	11.5371	11.512	11.519	11.4897	10.5784	10.5931	10.6441	10.6781
ENSG00000099942.13 CRKL	4745.89	-0.874848	0.0392053	-22.3146	2.66902e-110	2.99499e-108	12.7527	12.7306	12.7036	12.6788	11.9437	11.922	11.9619	11.9295
ENSG00000144668.12 ITGA9	354.192	2.31087	0.103585	22.3089	3.03108e-110	3.38622e-108	9.10819	9.13923	9.0904	9.15656	10.1199	10.165	10.1045	10.0753
ENSG00000114480.13 GBE1	2384.71	1.1304	0.0508394	22.2347	1.58497e-109	1.76288e-107	11.0016	10.9564	11.0636	10.9945	11.9528	11.854	11.9178	11.9177
ENSG00000255282.6 WTAPP1	344.783	-3.34816	0.150769	-22.2073	2.91972e-109	3.23321e-107	10.2933	10.1764	10.1887	9.99325	8.84605	8.9703	8.84452	8.87218
ENSG00000143382.16 ADAMTSL4	4868.8	1.21812	0.0549992	22.148	1.08959e-108	1.20131e-106	11.7903	11.8208	11.7763	11.7059	12.9284	12.8976	12.7478	12.8337
ENSG00000167703.15 SLC43A2	590.425	2.1708	0.0981532	22.1164	2.1973e-108	2.41206e-106	9.36778	9.38037	9.43205	9.48575	10.6479	10.5647	10.4462	10.5677
ENSG00000163762.7 TM4SF18	236.607	4.85976	0.21974	22.116	2.21935e-108	2.42572e-106	8.5479	8.58044	8.53841	8.58048	9.78376	9.88513	10.036	9.94167
ENSG00000204634.13 TBC1D8	3366.82	1.3115	0.0593304	22.1051	2.82358e-108	3.07284e-106	11.2603	11.2482	11.3094	11.3282	12.493	12.4461	12.3259	12.3059
ENSG00000101384.12 JAG1	4706.78	-1.10813	0.0501384	-22.1014	3.06276e-108	3.31883e-106	12.7146	12.7621	12.7613	12.8648	11.8477	11.8184	11.7547	11.7701
ENSG00000087303.18 NID2	1118.49	-1.32235	0.0599821	-22.0457	1.05039e-107	1.13334e-105	11.074	11.092	11.0276	11.1047	10.2223	10.1561	10.1564	10.2018
ENSG00000072864.16 NDE1	2430.03	-1.39407	0.0634861	-21.9587	7.14692e-107	7.67853e-105	12.0256	11.9356	12.0707	11.9687	11.0045	10.8579	10.8433	10.8382
ENSG00000151276.23 MAGI1	2904.73	1.59845	0.0728978	21.9273	1.42565e-106	1.52521e-104	10.8928	10.9323	10.8746	11.1419	12.2481	12.2539	12.3046	12.2868
ENSG00000168906.13 MAT2A	3402.76	1.05065	0.0479621	21.9059	2.28375e-106	2.43292e-104	11.4361	11.4973	11.4295	11.4079	12.4063	12.3098	12.3011	12.3296
ENSG00000143344.16 RGL1	1012.5	1.31176	0.0598856	21.9044	2.3579e-106	2.50135e-104	10.0737	10.0958	10.127	10.1248	10.9337	10.9699	10.9701	10.9873
ENSG00000169499.15 PLEKHA2	1131.72	-1.21154	0.0554076	-21.866	5.47662e-106	5.78551e-104	11.0468	11.0562	11.0678	11.0844	10.2373	10.2274	10.2379	10.2566
ENSG00000268869.6 ESPNP	289.826	2.99889	0.13716	21.8641	5.70958e-106	6.00648e-104	8.91853	8.93215	8.77548	8.92289	10.0663	10.04	9.94262	9.98076
ENSG00000253368.4 TRNP1	1450.68	1.41043	0.0645301	21.8569	6.67897e-106	6.99712e-104	10.3226	10.3027	10.4592	10.407	11.4155	11.4096	11.3542	11.362
ENSG00000133135.14 RNF128	1013.81	1.77218	0.0811344	21.8426	9.14438e-106	9.54039e-104	9.82545	9.94063	9.89842	10.0038	10.9687	11.0305	11.1134	11.1014
ENSG00000174640.15 SLCO2A1	401.977	2.67173	0.122353	21.8362	1.0515e-105	1.09252e-103	9.05633	9.0852	9.0421	9.15996	10.3747	10.2868	10.1669	10.1862
ENSG00000131669.10 NINJ1	1080.34	-1.3869	0.0635627	-21.8193	1.52069e-105	1.57354e-103	11.0814	11.0788	11.0653	10.9775	10.0951	10.1326	10.1145	10.1655
ENSG00000179889.19 PDXDC1	3545.58	-0.987596	0.0454419	-21.7332	9.96492e-105	1.02692e-102	12.4172	12.3519	12.3915	12.3244	11.4959	11.5071	11.5234	11.5731
ENSG00000107338.10 SHB	5524.06	1.16422	0.0535898	21.7246	1.20156e-104	1.23321e-102	11.9409	12.0108	11.9919	11.8979	13.0644	13.0775	12.9336	12.9458
ENSG00000079459.13 FDFT1	4535.66	-1.14554	0.0527581	-21.713	1.54711e-104	1.58144e-102	12.767	12.745	12.7831	12.658	11.7491	11.6642	11.6948	11.81
ENSG00000065320.9 NTN1	2066.55	1.22322	0.0563863	21.6936	2.35751e-104	2.40009e-102	10.8032	10.8821	10.737	10.794	11.7585	11.8195	11.7383	11.7263
ENSG00000117308.15 GALE	1852.13	1.35601	0.0625301	21.6856	2.80312e-104	2.8423e-102	10.6483	10.6505	10.6699	10.5492	11.6961	11.6654	11.5653	11.7118
ENSG00000001617.12 SEMA3F	552.186	1.92387	0.0887666	21.6733	3.66136e-104	3.69768e-102	9.47767	9.42939	9.44464	9.47379	10.528	10.5169	10.4064	10.3991
ENSG00000145040.4 UCN2	395.04	2.92728	0.135071	21.6722	3.75559e-104	3.77773e-102	8.98495	9.02301	9.02698	9.0431	10.4453	10.2425	10.1317	10.1994
ENSG00000166145.14 SPINT1	613.354	1.83009	0.084455	21.6694	3.98658e-104	3.99417e-102	9.50818	9.52526	9.58467	9.59185	10.4618	10.5608	10.5722	10.597
ENSG00000147535.17 PLPP5	988.237	-1.66774	0.0770959	-21.632	8.97415e-104	8.9557e-102	11.0106	11.0682	11.0389	10.9178	9.83891	9.95875	9.96536	9.98786
ENSG00000104435.14 STMN2	543.022	1.87176	0.0866268	21.6071	1.53951e-103	1.53029e-101	9.47101	9.44437	9.50827	9.43453	10.4605	10.4771	10.3594	10.4619
ENSG00000117143.13 UAP1	2268.33	-1.00863	0.0467135	-21.5919	2.13935e-103	2.11821e-101	11.7947	11.8251	11.8618	11.7858	10.9994	10.9901	11.0144	11.0373
ENSG00000162458.13 FBLIM1	3408.59	1.0002	0.0464317	21.5413	6.38676e-103	6.29894e-101	11.4347	11.5037	11.5354	11.4162	12.3162	12.3295	12.3176	12.3332
ENSG00000169126.16 ARMC4	325.874	-2.33786	0.108668	-21.5136	1.16014e-102	1.13974e-100	10.0366	9.98854	10.08	10.0904	9.09364	9.11443	9.05381	9.0823
ENSG00000142627.13 EPHA2	1908.2	1.43857	0.0669308	21.4933	1.79709e-102	1.75865e-100	10.6204	10.5722	10.68	10.6009	11.8393	11.7215	11.6508	11.6414
ENSG00000057149.16 SERPINB3	1149.01	-1.45658	0.0678038	-21.4823	2.28128e-102	2.22385e-100	11.0623	11.1648	11.2026	11.1021	10.1443	10.0862	10.1582	10.1982
ENSG00000120549.18 KIAA1217	1213.97	1.51425	0.070528	21.4701	2.96188e-102	2.87622e-100	10.1823	10.1137	10.1624	10.2189	11.2696	11.2653	11.1724	11.1111
ENSG00000115290.10 GRB14	258.389	-2.88408	0.134339	-21.4686	3.05855e-102	2.95871e-100	9.88948	9.88907	9.90459	9.96885	8.86501	8.78611	8.92092	8.91361
ENSG00000184349.14 EFNA5	1694.7	1.24924	0.058323	21.4193	8.82919e-102	8.50837e-100	10.6006	10.6184	10.5862	10.5724	11.5871	11.5589	11.5358	11.4344
ENSG00000075643.6 MOCOS	1029.33	1.59229	0.0744741	21.3805	2.0304e-101	1.94918e-99	9.98719	9.90543	10.0494	10.0679	10.9918	11.0388	11.0236	11.0996
ENSG00000248690.8 HAS2-AS1	264.428	-2.60647	0.121981	-21.3679	2.65988e-101	2.54381e-99	9.88644	9.92316	9.94495	9.88924	8.91856	8.89521	8.95442	8.98924
ENSG00000075651.16 PLD1	3059.44	1.80708	0.0845878	21.3634	2.92671e-101	2.78844e-99	10.7972	10.8505	10.9463	11.0106	12.2005	12.3321	12.5229	12.4568
ENSG00000140459.18 CYP11A1	638.692	1.69098	0.079499	21.2705	2.12963e-100	2.02139e-98	9.59068	9.62758	9.70583	9.57671	10.5749	10.5304	10.5633	10.5962
ENSG00000153976.3 HS3ST3A1	1472.91	-1.14472	0.0538177	-21.2703	2.13859e-100	2.02229e-98	11.3094	11.3324	11.3622	11.3654	10.4618	10.5115	10.5433	10.5116
ENSG00000163814.8 CDCP1	12824.5	0.671498	0.0315757	21.2663	2.33142e-100	2.1964e-98	13.3423	13.3566	13.3443	13.3807	14.0059	14.0097	13.9999	13.9734
ENSG00000072134.15 EPN2	5482.43	-0.762015	0.0358898	-21.2321	4.8253e-100	4.52896e-98	12.881	12.8681	12.845	12.8858	12.2066	12.1798	12.1843	12.1616
ENSG00000025772.8 TOMM34	4522.03	-0.883914	0.0417539	-21.1696	1.82039e-99	1.70227e-97	12.671	12.6435	12.6897	12.6165	11.9136	11.8947	11.8438	11.8495
ENSG00000101160.15 CTSZ	2990.79	1.26016	0.0597913	21.076	1.32004e-98	1.22983e-96	11.1452	11.1723	11.2625	11.1488	12.3459	12.2071	12.179	12.1793
ENSG00000104140.7 RHOV	825.215	1.67466	0.0795315	21.0566	1.99012e-98	1.8473e-96	9.81578	9.70952	9.82169	9.86595	10.749	10.8642	10.8085	10.8572
ENSG00000152092.16 ASTN1	591.463	1.71962	0.0819016	20.9962	7.10308e-98	6.56917e-96	9.49739	9.60238	9.59553	9.56577	10.5232	10.5357	10.4691	10.4639
ENSG00000166741.8 NNMT	1071.06	2.00671	0.0957744	20.9524	1.78329e-97	1.64323e-95	9.854	9.89564	9.8818	9.81794	11.3107	11.1323	10.9548	11.1921
ENSG00000170525.21 PFKFB3	10685.6	0.809917	0.0386733	20.9425	2.19399e-97	2.01432e-95	12.9869	13.0158	13.0885	13.0205	13.7681	13.8243	13.8093	13.773
ENSG00000272502.1 AC104958.2	326.887	3.66887	0.17534	20.9243	3.21896e-97	2.94465e-95	8.82426	8.80952	8.82656	8.75575	9.91509	10.0556	10.2445	10.3025
ENSG00000102699.6 PARP4	5266.38	0.853356	0.0407903	20.9206	3.47745e-97	3.16963e-95	12.0519	12.0419	12.1111	12.1191	12.8624	12.8464	12.8127	12.8671
ENSG00000214022.11 REPIN1	1983.74	1.17494	0.0561902	20.9101	4.33717e-97	3.93902e-95	10.8158	10.8332	10.7865	10.7118	11.715	11.7501	11.6834	11.646
ENSG00000175832.13 ETV4	4457.3	0.909282	0.0434963	20.9048	4.84142e-97	4.38122e-95	11.8573	11.8417	11.8847	11.7874	12.6783	12.6591	12.5989	12.6426
ENSG00000143127.13 ITGA10	545.473	-2.30834	0.110695	-20.8531	1.42724e-96	1.28696e-94	10.5936	10.5053	10.5274	10.365	9.23962	9.30067	9.40336	9.35903
ENSG00000184584.13 STING1	2972.56	-1.14401	0.0549471	-20.8203	2.83694e-96	2.549e-94	12.2191	12.2248	12.2155	12.1002	11.1806	11.263	11.2065	11.3017
ENSG00000180914.11 OXTR	207.096	-3.31676	0.159327	-20.8173	3.01546e-96	2.6998e-94	9.77457	9.71337	9.84567	9.75682	8.65415	8.76143	8.76049	8.76795
ENSG00000006740.17 ARHGAP44	342.477	-2.23683	0.107614	-20.7856	5.83763e-96	5.20807e-94	10.1447	10.0506	10.0729	10.0551	9.11123	9.16158	9.16409	9.07527
ENSG00000140945.17 CDH13	2691.83	1.11534	0.0537373	20.7555	1.09314e-95	9.71819e-94	11.1311	11.1404	11.1678	11.1317	12.1464	12.0834	11.994	12.004
ENSG00000176428.6 VPS37D	599.512	-1.5627	0.0754108	-20.7225	2.17039e-95	1.92274e-93	10.5201	10.4538	10.5173	10.454	9.6228	9.60848	9.62672	9.64486
ENSG00000104687.14 GSR	1742.6	-1.17579	0.0568172	-20.6943	3.89667e-95	3.43997e-93	11.5428	11.4909	11.6215	11.5205	10.6069	10.6976	10.6513	10.6715
ENSG00000273812.3 BX640514.2	486.024	1.89762	0.0917559	20.6812	5.11942e-95	4.50367e-93	9.4137	9.35353	9.39656	9.4066	10.3881	10.3981	10.2688	10.3135
ENSG00000171388.12 APLN	196.765	5.09043	0.246282	20.6691	6.56862e-95	5.75849e-93	8.53794	8.51694	8.43917	8.52852	9.71893	9.74774	9.88489	9.77773
ENSG00000162511.8 LAPTM5	321.566	2.64167	0.127991	20.6396	1.21122e-94	1.05816e-92	8.96081	9.01074	8.97958	9.07022	10.1777	10.0517	9.98163	10.0446
ENSG00000181291.8 TMEM132E	172.608	3.68939	0.179295	20.5772	4.39357e-94	3.82513e-92	8.6774	8.65009	8.6338	8.61693	9.67671	9.64774	9.64988	9.67683
ENSG00000021355.13 SERPINB1	1412.87	1.26702	0.0616527	20.5509	7.54858e-94	6.54936e-92	10.3925	10.3738	10.4944	10.4016	11.3289	11.2543	11.336	11.3686
ENSG00000110048.12 OSBP	4541.65	-0.913837	0.0445117	-20.5302	1.15619e-93	9.99707e-92	12.703	12.6623	12.6929	12.6248	11.8159	11.9141	11.8895	11.8333
ENSG00000157766.19 ACAN	235.318	-2.61661	0.127512	-20.5204	1.41516e-93	1.21945e-91	9.84614	9.78583	9.82389	9.84391	8.85244	8.90835	8.92404	8.91361
ENSG00000177181.15 RIMKLA	1174.19	1.2013	0.0585471	20.5185	1.47053e-93	1.26285e-91	10.2327	10.3121	10.2919	10.2719	11.0557	11.1176	11.1099	11.1201
ENSG00000148798.11 INA	366.92	2.14724	0.104792	20.4906	2.61336e-93	2.23668e-91	9.19372	9.12872	9.19543	9.21575	10.0663	10.1031	10.1859	10.1544
ENSG00000184985.16 SORCS2	1283.18	1.56282	0.0763358	20.473	3.74914e-93	3.19792e-91	10.1533	10.2498	10.0994	10.2707	11.3566	11.313	11.2303	11.2085
ENSG00000007062.12 PROM1	212.79	2.85811	0.140015	20.4129	1.28437e-92	1.09184e-90	8.82426	8.83726	8.84708	8.79808	9.75516	9.76274	9.73792	9.81439
ENSG00000150961.15 SEC24D	3432.87	-0.885898	0.0434176	-20.4041	1.53685e-92	1.30209e-90	12.2936	12.2623	12.3566	12.2823	11.527	11.5532	11.5622	11.524
ENSG00000166446.15 CDYL2	3085.98	-1.15382	0.0565543	-20.4019	1.60719e-92	1.35714e-90	12.2475	12.2222	12.1925	12.3028	11.182	11.2448	11.3317	11.333
ENSG00000160712.13 IL6R	1013.84	1.52998	0.0750759	20.3791	2.56513e-92	2.15881e-90	10.0592	9.9594	10.0729	9.97806	10.9319	10.9718	11.08	11.0531
ENSG00000172183.16 ISG20	965.494	-2.04987	0.100692	-20.3578	3.95857e-92	3.32047e-90	11.1329	11.0089	11.1709	10.8538	9.71893	9.71712	9.8425	9.78952
ENSG00000161638.11 ITGA5	20799.1	-0.922579	0.0454091	-20.3171	9.08442e-92	7.59482e-90	14.815	14.7286	14.8274	14.6812	13.9155	13.8794	13.8407	13.8396
ENSG00000091436.17 MAP3K20	4502.92	-1.24437	0.0613559	-20.2812	1.88575e-91	1.57133e-89	12.6606	12.7419	12.725	12.8913	11.6124	11.6181	11.7097	11.7129
ENSG00000187840.5 EIF4EBP1	3042.02	-1.24462	0.0613869	-20.275	2.13964e-91	1.77703e-89	12.3221	12.2374	12.3083	12.1114	11.245	11.1756	11.1778	11.2408
ENSG00000160223.17 ICOSLG	2241.31	1.26912	0.0626272	20.2647	2.63613e-91	2.18219e-89	10.8443	10.8745	10.7803	10.9595	11.8949	11.9225	11.8791	11.7859
ENSG00000197321.15 SVIL	3877.7	0.96959	0.0478977	20.2429	4.10134e-91	3.38401e-89	11.5932	11.5886	11.6563	11.7244	12.4821	12.4964	12.4735	12.4747
ENSG00000100311.17 PDGFB	829.771	1.78242	0.0882926	20.1877	1.2566e-90	1.03344e-88	9.86956	9.79658	9.73712	9.65032	10.8868	10.8663	10.7973	10.8271
ENSG00000120318.16 ARAP3	1487.34	1.24548	0.0617389	20.1734	1.6775e-90	1.37511e-88	10.4256	10.5023	10.4671	10.4923	11.4721	11.3183	11.3589	11.355
ENSG00000143786.8 CNIH3	1931.01	1.04871	0.052005	20.1655	1.96837e-90	1.60833e-88	10.8393	10.7963	10.8521	10.8022	11.6042	11.6052	11.6201	11.7003
ENSG00000134853.12 PDGFRA	8054.59	-0.96028	0.047633	-20.16	2.19926e-90	1.79119e-88	13.4006	13.4324	13.5025	13.4859	12.4749	12.5595	12.6082	12.6071
ENSG00000144476.6 ACKR3	373.071	1.88414	0.0934948	20.1523	2.56704e-90	2.08401e-88	9.24622	9.27989	9.26254	9.24999	10.1281	10.129	10.0805	10.1129
ENSG00000174804.4 FZD4	819.353	-1.42552	0.0707478	-20.1494	2.72652e-90	2.20638e-88	10.779	10.7832	10.6967	10.8086	9.86554	9.916	9.86053	9.93577
ENSG00000163297.18 ANTXR2	4703.4	-1.07372	0.0533265	-20.1347	3.6618e-90	2.95377e-88	12.6981	12.757	12.7626	12.8445	11.7367	11.7944	11.8425	11.8845
ENSG00000121691.7 CAT	996.307	1.33137	0.0662006	20.1112	5.88839e-90	4.73472e-88	10.0944	10.1205	10.0853	10.029	11.0171	10.9454	10.9034	10.9444
ENSG00000171992.13 SYNPO	1796.62	1.42645	0.0709958	20.0921	8.65606e-90	6.93804e-88	10.5311	10.5865	10.4867	10.6507	11.7352	11.683	11.5865	11.5517
ENSG00000243244.7 STON1	1005.15	-1.47896	0.0736961	-20.0683	1.39671e-89	1.11596e-87	10.9307	11.0012	10.98	11.0571	10.0456	9.93543	10.0263	10.1027
ENSG00000248323.7 LUCAT1	3328.82	0.870131	0.0434237	20.0382	2.55963e-89	2.03866e-87	11.5099	11.4845	11.5263	11.5387	12.2163	12.2394	12.3009	12.2589
ENSG00000104856.14 RELB	3267.25	-1.08526	0.0542326	-20.0112	4.39605e-89	3.4903e-87	12.29	12.2287	12.3614	12.2992	11.3107	11.3437	11.3971	11.4506
ENSG00000170379.20 TCAF2	424.431	2.0336	0.101692	19.9976	5.77743e-89	4.57268e-87	9.28497	9.3003	9.24334	9.29463	10.264	10.3108	10.1343	10.2474
ENSG00000144381.18 HSPD1	8952.1	-0.833105	0.0417079	-19.9748	9.13294e-89	7.20589e-87	13.5434	13.5275	13.5847	13.5775	12.7823	12.7023	12.7942	12.8297
ENSG00000149177.13 PTPRJ	3095.4	-1.03234	0.0516911	-19.9714	9.76593e-89	7.68131e-87	12.1865	12.1993	12.2137	12.2398	11.3959	11.4103	11.2851	11.2874
ENSG00000049323.16 LTBP1	4452.16	-1.07873	0.0540458	-19.9596	1.23715e-88	9.70047e-87	12.6885	12.642	12.7224	12.7232	11.7863	11.8321	11.6522	11.7153
ENSG00000185666.15 SYN3	302.786	-2.23166	0.111821	-19.9575	1.29046e-88	1.00872e-86	9.98439	10.0346	9.90869	10.0008	9.03832	9.07457	9.09396	9.09959
ENSG00000105771.14 SMG9	2644.8	-1.06465	0.0533543	-19.9543	1.37553e-88	1.07189e-86	12.0632	12.0145	12.0723	11.9319	11.1384	11.2029	11.1321	11.1291
ENSG00000235823.3 OLMALINC	975.477	1.22752	0.0615661	19.9382	1.89582e-88	1.47279e-86	10.1021	10.1205	10.1011	10.1098	10.8786	10.8839	10.9039	10.964
ENSG00000163064.7 EN1	191.895	-3.47645	0.174667	-19.9033	3.80652e-88	2.94807e-86	9.81578	9.7172	9.72758	9.64011	8.66354	8.72652	8.73935	8.65132
ENSG00000106366.9 SERPINE1	27611.5	-1.6018	0.080516	-19.8942	4.56686e-88	3.52612e-86	15.366	15.3185	15.4441	15.3186	14.0261	13.8624	13.6165	13.6659
ENSG00000120738.8 EGR1	4227.2	-1.17527	0.0591125	-19.8819	5.83751e-88	4.49346e-86	12.6855	12.6312	12.6354	12.6637	11.7362	11.6548	11.6222	11.4972
ENSG00000114268.12 PFKFB4	1331.46	1.79286	0.0901776	19.8814	5.89692e-88	4.52539e-86	10.1642	10.1014	10.1098	10.1207	11.5339	11.4215	11.1924	11.282
ENSG00000006016.11 CRLF1	529.913	2.21975	0.112037	19.8126	2.31604e-87	1.77198e-85	9.4066	9.28869	9.34594	9.32321	10.5481	10.5477	10.3036	10.4344
ENSG00000182534.13 MXRA7	5111.06	1.18947	0.0600647	19.8032	2.79544e-87	2.13231e-85	11.8335	11.8027	11.9343	11.8285	13.018	12.9466	12.8684	12.7972
ENSG00000182985.18 CADM1	6509.69	1.12146	0.0566739	19.7879	3.78381e-87	2.87752e-85	12.2038	12.1999	12.22	12.1461	13.354	13.2032	13.1232	13.1717
ENSG00000101187.16 SLCO4A1	38748.2	1.17815	0.0595578	19.7817	4.28181e-87	3.24646e-85	14.627	14.575	14.6062	14.473	15.8485	15.7891	15.6187	15.6508
ENSG00000127884.5 ECHS1	904.848	-1.4996	0.0758208	-19.7782	4.58693e-87	3.46739e-85	10.8808	10.8752	10.9934	10.7842	9.94953	9.91817	9.9592	9.92835
ENSG00000147872.10 PLIN2	13310.4	1.13979	0.0576528	19.77	5.40218e-87	4.07147e-85	13.1653	13.1055	13.2099	12.9892	14.2648	14.2288	14.1098	14.2188
ENSG00000074416.14 MGLL	2677.31	1.14301	0.0578433	19.7605	6.5187e-87	4.89834e-85	11.0272	11.0901	11.2065	11.1657	12.0133	12.0527	12.0877	12.0778
ENSG00000170412.18 GPRC5C	2110.64	1.20031	0.0608445	19.7275	1.25255e-86	9.38411e-85	10.8342	10.8339	10.8794	10.8078	11.881	11.7776	11.6785	11.7776
ENSG00000021645.20 NRXN3	290.124	2.62839	0.13339	19.7046	1.97084e-86	1.47218e-84	8.90081	9.01894	8.90468	9.04703	10.0227	10.0101	9.98365	9.91338
ENSG00000106333.13 PCOLCE	6404.24	1.48505	0.0753781	19.7014	2.09724e-86	1.56198e-84	12.0105	11.9248	12.0106	11.837	13.475	13.2873	13.129	13.2556
ENSG00000102024.18 PLS3	6437.65	-1.0103	0.0512841	-19.7001	2.15149e-86	1.59767e-84	13.1232	13.115	13.2428	13.1845	12.1954	12.186	12.3154	12.2754
ENSG00000242265.6 PEG10	1742.75	-1.36073	0.0692155	-19.6593	4.81435e-86	3.5646e-84	11.5397	11.5863	11.5336	11.6884	10.6686	10.5816	10.5243	10.5022
ENSG00000146966.13 DENND2A	269.001	2.5208	0.128357	19.6391	7.17274e-86	5.29524e-84	8.94001	9.01485	8.91678	8.98988	9.86351	10.0081	9.88817	9.90278
ENSG00000170454.6 KRT75	200.861	-3.39677	0.17302	-19.6322	8.20857e-86	6.04227e-84	9.6964	9.74925	9.71555	9.84219	8.77049	8.79408	8.66452	8.67997
ENSG00000100055.21 CYTH4	1486.82	1.47297	0.0750413	19.6287	8.78866e-86	6.45047e-84	10.4076	10.3501	10.4299	10.2743	11.5212	11.4438	11.3084	11.4305
ENSG00000081320.11 STK17B	2775.67	-1.41986	0.0723942	-19.6128	1.20116e-85	8.79041e-84	12.0732	12.1421	12.1147	12.3535	10.9893	10.967	11.0743	11.0206
ENSG00000130762.15 ARHGEF16	482.555	1.86116	0.0953341	19.5225	7.0635e-85	5.15431e-83	9.44162	9.44189	9.38332	9.32882	10.3666	10.3265	10.2567	10.3743
ENSG00000105808.18 RASA4	1608.5	-1.19288	0.0611493	-19.5076	9.4547e-85	6.87932e-83	11.4873	11.416	11.4393	11.4708	10.6103	10.6421	10.4916	10.5468
ENSG00000168495.13 POLR3D	2175.35	-0.994268	0.050998	-19.4962	1.18203e-84	8.5758e-83	11.7914	11.788	11.7271	11.7402	10.9239	10.9621	10.9696	11.0347
ENSG00000167962.14 ZNF598	2554.18	-0.970193	0.0497944	-19.484	1.50167e-84	1.08637e-82	11.9921	11.9765	11.9587	11.8751	11.1559	11.1772	11.1266	11.1829
ENSG00000267575.7 AC006504.5	166.241	-3.20464	0.164542	-19.4761	1.74953e-84	1.26206e-82	9.60839	9.62551	9.64048	9.6004	8.70764	8.75293	8.70812	8.65867
ENSG00000133703.13 KRAS	20415.5	1.36669	0.0701794	19.4742	1.81581e-84	1.30614e-82	13.4198	13.5168	13.4811	13.7628	14.8189	14.8453	14.9338	14.894
ENSG00000164509.15 IL31RA	563.545	-1.66912	0.0861336	-19.3783	1.17729e-83	8.44435e-82	10.3843	10.4705	10.4231	10.5004	9.47757	9.59409	9.54369	9.59007
ENSG00000127824.14 TUBA4A	239.146	-2.54777	0.131514	-19.3725	1.31604e-83	9.41286e-82	9.8788	9.82824	9.86494	9.75126	8.94646	8.86108	8.92714	8.9398
ENSG00000129226.14 CD68	5215.17	-0.948547	0.0490042	-19.3564	1.79873e-83	1.28289e-81	12.9172	12.8639	12.9065	12.7668	12.0567	12.0038	11.978	12.0228
ENSG00000154065.17 ANKRD29	797.861	-1.51568	0.0783203	-19.3523	1.9485e-83	1.3858e-81	10.7576	10.818	10.7241	10.735	9.79242	9.77509	9.84703	9.92984
ENSG00000029153.14 ARNTL2	4316.29	-1.25343	0.064924	-19.3061	4.76999e-83	3.38294e-81	12.5878	12.6703	12.6974	12.8471	11.5299	11.5947	11.656	11.6493
ENSG00000157483.9 MYO1E	4258.35	0.76778	0.0398621	19.2609	1.14397e-82	8.09043e-81	11.8889	11.8328	11.8685	11.8657	12.577	12.5363	12.5082	12.5351
ENSG00000154556.18 SORBS2	312.696	-2.31739	0.120414	-19.2453	1.54682e-82	1.0909e-80	9.97027	10.0273	9.95876	10.1029	8.99898	9.07967	9.06405	9.13306
ENSG00000147202.18 DIAPH2	841.533	1.36066	0.0707342	19.2363	1.83982e-82	1.29392e-80	9.8788	9.91513	9.93898	10.0186	10.788	10.7734	10.8021	10.7663
ENSG00000276231.5 PIK3R6	157.705	3.80031	0.197632	19.2292	2.10698e-82	1.47769e-80	8.57602	8.60812	8.65422	8.6255	9.54192	9.60848	9.66859	9.60403
ENSG00000168394.12 TAP1	2287.04	-1.32488	0.0689674	-19.2102	3.03867e-82	2.12522e-80	11.9456	11.9061	11.9989	11.7806	10.8374	10.8011	10.8334	10.958
ENSG00000172379.21 ARNT2	2922.79	0.82899	0.0432181	19.1815	5.27985e-82	3.68248e-80	11.3747	11.3488	11.3853	11.4276	12.0733	12.0961	12.0849	12.0542
ENSG00000171208.10 NETO2	4095.19	-1.05902	0.0552301	-19.1746	6.03116e-82	4.1949e-80	12.4587	12.5764	12.5975	12.6771	11.6712	11.669	11.6384	11.6509
ENSG00000214063.11 TSPAN4	1425.77	1.33658	0.0697363	19.1662	7.09233e-82	4.91943e-80	10.3985	10.4252	10.3831	10.3526	11.4136	11.4103	11.2181	11.3509
ENSG00000147471.12 PLPBP	738.775	-1.31996	0.0689536	-19.1427	1.11383e-81	7.70464e-80	10.6458	10.6378	10.6518	10.6407	9.82012	9.90506	9.8816	9.81439
ENSG00000163755.9 HPS3	2409.48	1.14125	0.0596377	19.1364	1.25557e-81	8.66135e-80	10.9046	11.0494	10.9871	11.0903	11.8896	11.9102	11.9565	11.9504
ENSG00000198853.12 RUSC2	2107.48	-0.973003	0.0508485	-19.1353	1.28296e-81	8.82622e-80	11.7495	11.7275	11.7069	11.6811	10.9565	10.9872	10.8889	10.9727
ENSG00000144115.18 THNSL2	842.119	1.33763	0.0700897	19.0846	3.39099e-81	2.32652e-79	9.89857	9.99609	9.93098	9.96422	10.7141	10.8	10.7816	10.8174
ENSG00000163430.12 FSTL1	15891	0.824972	0.0433245	19.0417	7.69688e-81	5.26642e-79	13.4754	13.5358	13.6158	13.6019	14.3198	14.3622	14.3414	14.3837
ENSG00000163659.13 TIPARP	2133.58	1.00667	0.0529157	19.0241	1.07694e-80	7.34879e-79	10.9266	10.916	10.9673	10.981	11.6858	11.7032	11.7929	11.7791
ENSG00000196781.16 TLE1	2383.8	-1.01001	0.0531324	-19.0093	1.42849e-80	9.72143e-79	11.8601	11.8887	11.9315	11.8312	10.9884	11.1001	11.1052	11.0569
ENSG00000005471.19 ABCB4	237.622	2.4704	0.130245	18.9674	3.17144e-80	2.15249e-78	8.90973	8.9275	8.91076	8.98561	9.77285	9.87841	9.78425	9.84514
ENSG00000164932.13 CTHRC1	5452.98	1.11608	0.0588539	18.9635	3.41486e-80	2.31148e-78	11.9094	11.8578	12.0477	12.0704	12.9393	12.9973	12.9716	12.992
ENSG00000126391.14 FRMD8	2058.98	-1.02297	0.0539452	-18.9631	3.43977e-80	2.32212e-78	11.7277	11.6674	11.7758	11.6373	10.8987	10.9316	10.8828	10.893
ENSG00000130592.17 LSP1	212.791	2.64456	0.139559	18.9494	4.46829e-80	3.00841e-78	8.90973	8.88405	8.83348	8.82639	9.72581	9.70934	9.78783	9.79454
ENSG00000168938.6 PPIC	554.439	1.66708	0.0880207	18.9396	5.37699e-80	3.61059e-78	9.45303	9.53889	9.61161	9.56797	10.4655	10.4432	10.4172	10.3898
ENSG00000205336.14 ADGRG1	1365.21	1.48338	0.0784308	18.9132	8.87547e-80	5.94398e-78	10.2988	10.3237	10.2904	10.2251	11.4708	11.3607	11.2133	11.2713
ENSG00000077238.14 IL4R	2125.81	1.10236	0.0583413	18.8951	1.25184e-79	8.3615e-78	10.8759	10.8745	10.9138	10.9155	11.8569	11.7885	11.6811	11.7224
ENSG00000172020.13 GAP43	149.055	3.67328	0.19496	18.8412	3.47084e-79	2.31218e-77	8.58488	8.60812	8.61226	8.66577	9.56074	9.61701	9.53472	9.55744
ENSG00000130640.14 TUBGCP2	16237.5	1.24752	0.0662686	18.8252	4.69828e-79	3.12164e-77	13.3822	13.3123	13.3817	13.1897	14.6471	14.5714	14.3923	14.4442
ENSG00000105483.18 CARD8	1545.77	-1.13576	0.0604358	-18.7928	8.64168e-79	5.72665e-77	11.3542	11.3987	11.3409	11.4823	10.5944	10.506	10.5678	10.565
ENSG00000198794.12 SCAMP5	722.228	1.62758	0.0868168	18.7473	2.0354e-78	1.34528e-76	9.68555	9.71337	9.77446	9.7382	10.8085	10.664	10.616	10.6119
ENSG00000088888.18 MAVS	4561.57	0.935134	0.0499467	18.7226	3.23773e-78	2.13437e-76	11.8442	11.8943	11.7625	11.9203	12.7027	12.7199	12.6668	12.6451
ENSG00000145623.13 OSMR	12825.3	0.758278	0.0405432	18.703	4.68015e-78	3.0772e-76	13.2874	13.2606	13.3087	13.3623	14.0607	14.0622	14.0133	13.9785
ENSG00000186868.17 MAPT	1444.82	1.10784	0.0592475	18.6985	5.09481e-78	3.34114e-76	10.4846	10.5033	10.5361	10.5025	11.3889	11.3266	11.2672	11.2567
ENSG00000164733.22 CTSB	45619.7	-0.697136	0.0373039	-18.688	6.19642e-78	4.05303e-76	15.8311	15.7483	15.855	15.7609	15.0981	15.1072	15.1081	15.1331
ENSG00000197122.12 SRC	1689.4	-0.935443	0.0500685	-18.6832	6.77709e-78	4.42139e-76	11.4437	11.4706	11.4276	11.4394	10.7078	10.7222	10.7378	10.7841
ENSG00000105963.15 ADAP1	730.993	1.36262	0.0730878	18.6437	1.42194e-77	9.25288e-76	9.82545	9.83516	9.83265	9.83359	10.6793	10.647	10.5607	10.679
ENSG00000198959.12 TGM2	2509.86	0.809608	0.0434872	18.6171	2.33394e-77	1.51484e-75	11.1938	11.2168	11.2448	11.2313	11.8509	11.8917	11.8971	11.8859
ENSG00000096968.14 JAK2	1013.96	-1.72274	0.0925784	-18.6085	2.74361e-77	1.77617e-75	10.9074	11.0324	11.025	11.208	9.84922	9.93114	9.97047	9.99069
ENSG00000085449.15 WDFY1	3320.66	-1.34329	0.0724008	-18.5535	7.64107e-77	4.93406e-75	12.2887	12.3669	12.3593	12.5172	11.1346	11.2614	11.3692	11.2364
ENSG00000277363.5 SRCIN1	867.533	1.31408	0.0708355	18.5511	7.99125e-77	5.14702e-75	9.97735	10.0258	9.93098	9.97653	10.8646	10.8378	10.7717	10.7444
ENSG00000269927.1 AC004817.3	320.807	2.40663	0.129767	18.5457	8.83149e-77	5.67373e-75	9.08443	8.97258	9.04707	9.12528	10.1034	10.0748	9.9258	10.0673
ENSG00000184613.11 NELL2	603.462	1.46208	0.0789348	18.5226	1.35794e-76	8.70183e-75	9.67092	9.6461	9.61161	9.72307	10.4402	10.4868	10.4545	10.521
ENSG00000131149.19 GSE1	3288.46	1.01995	0.0550749	18.5193	1.44214e-76	9.21803e-75	11.4318	11.4175	11.3157	11.5074	12.3015	12.2932	12.3075	12.2356
ENSG00000060656.20 PTPRU	8130.48	0.784918	0.042385	18.5188	1.45723e-76	9.29094e-75	12.6732	12.6983	12.644	12.6993	13.4587	13.4509	13.3462	13.3815
ENSG00000121892.15 PDS5A	5307.64	-0.922048	0.0498243	-18.506	1.84699e-76	1.17168e-74	12.8276	12.8819	12.8597	12.9492	11.9643	12.0657	12.1028	12.0708
ENSG00000261147.1 AC091167.2	132.59	-4.26735	0.230592	-18.5061	1.84441e-76	1.17168e-74	9.49304	9.52755	9.50827	9.50926	8.56942	8.58925	8.49156	8.50746
ENSG00000029993.15 HMGB3	4671.44	0.85847	0.0463929	18.5043	1.90537e-76	1.20568e-74	11.9236	11.8688	11.9897	11.9345	12.6619	12.6573	12.6894	12.7496
ENSG00000112640.16 PPP2R5D	5346.95	-0.82422	0.0445655	-18.4946	2.28385e-76	1.44157e-74	12.8583	12.8699	12.9111	12.7885	12.1351	12.1537	12.0762	12.1026
ENSG00000113140.11 SPARC	20310.7	0.966205	0.052412	18.4348	6.90753e-76	4.34916e-74	13.7838	13.7915	13.9175	13.7353	14.8345	14.7387	14.6779	14.7259
ENSG00000259207.9 ITGB3	8564.67	1.00276	0.0544078	18.4305	7.47861e-76	4.69701e-74	12.5279	12.6349	12.557	12.7451	13.5473	13.578	13.5643	13.5231
ENSG00000151287.17 TEX30	702.334	-1.42833	0.0775185	-18.4256	8.18306e-76	5.1267e-74	10.6263	10.5616	10.6159	10.6516	9.70736	9.86257	9.76982	9.78111
ENSG00000101096.20 NFATC2	176.563	-2.84748	0.154707	-18.4056	1.18423e-75	7.40086e-74	9.57469	9.66029	9.61956	9.70388	8.77782	8.78611	8.76461	8.77932
ENSG00000162433.15 AK4	5348.25	0.759382	0.0412642	18.4029	1.24435e-75	7.75736e-74	12.0978	12.1733	12.1978	12.142	12.8649	12.8392	12.8352	12.805
ENSG00000103855.18 CD276	4871.11	0.911157	0.0495265	18.3974	1.37928e-75	8.57737e-74	11.9165	11.9432	12.005	11.9399	12.8491	12.7695	12.6932	12.7342
ENSG00000010810.17 FYN	2796.72	-0.810149	0.0440785	-18.3797	1.91143e-75	1.18574e-73	12.0215	11.9758	12.0544	12.0138	11.3454	11.3077	11.3617	11.3544
ENSG00000197265.9 GTF2E2	1374.25	-1.26499	0.0689421	-18.3486	3.38461e-75	2.09448e-73	11.2827	11.2657	11.4099	11.2019	10.3747	10.3574	10.3809	10.4413
ENSG00000166033.13 HTRA1	1500.53	1.37362	0.0749046	18.3383	4.09422e-75	2.5274e-73	10.3606	10.3771	10.5021	10.4414	11.5001	11.4479	11.2821	11.4281
ENSG00000172348.15 RCAN2	363.267	1.95608	0.106683	18.3354	4.31736e-75	2.65865e-73	9.1662	9.24068	9.26254	9.24999	10.0816	10.0182	10.166	10.1219
ENSG00000234444.10 ZNF736	145.829	-5.28666	0.288421	-18.3297	4.79971e-75	2.94849e-73	9.54404	9.64202	9.53437	9.6173	8.45358	8.44631	8.43342	8.49581
ENSG00000168958.20 MFF	3207.64	-0.92856	0.0506961	-18.3162	6.14526e-75	3.76591e-73	12.2667	12.2085	12.2713	12.1526	11.4551	11.3918	11.4204	11.4903
ENSG00000166501.14 PRKCB	161.797	3.20182	0.175604	18.2332	2.81437e-74	1.72051e-72	8.69096	8.65009	8.71879	8.73646	9.52552	9.66686	9.60445	9.60601
ENSG00000115414.21 FN1	31236.2	-1.36457	0.0750403	-18.1845	6.84552e-74	4.17477e-72	15.3486	15.4148	15.4817	15.6443	14.2847	14.2053	14.0139	14.0452
ENSG00000086062.13 B4GALT1	3644.67	-0.787815	0.0434132	-18.1469	1.35886e-73	8.26713e-72	12.3114	12.3556	12.3244	12.3828	11.6997	11.6911	11.6411	11.6306
ENSG00000113319.13 RASGRF2	2431.27	0.998061	0.0550094	18.1435	1.44614e-73	8.77693e-72	11.0611	11.0433	11.0812	11.1756	11.9416	11.9333	11.8626	11.8567
ENSG00000104695.13 PPP2CB	1546.48	-0.976285	0.0538513	-18.1293	1.87241e-73	1.13369e-71	11.3031	11.3335	11.3778	11.4005	10.6091	10.6592	10.6386	10.6206
ENSG00000139178.11 C1RL	922.719	1.28561	0.0709312	18.1247	2.03528e-73	1.22935e-71	10.0011	10.0125	10.1219	10.0216	10.9177	10.8839	10.8117	10.833
ENSG00000240184.7 PCDHGC3	5131.7	0.814329	0.0449676	18.1092	2.69471e-73	1.62377e-71	12.0396	12.0509	12.0917	12.0977	12.829	12.86	12.7415	12.7676
ENSG00000179869.15 ABCA13	130.654	-4.54819	0.251174	-18.1077	2.76871e-73	1.66439e-71	9.47323	9.46884	9.50827	9.58106	8.50299	8.44631	8.52388	8.51862
ENSG00000186815.13 TPCN1	1952.4	1.11777	0.0617295	18.1075	2.77994e-73	1.66717e-71	10.8631	10.8775	10.737	10.7118	11.6654	11.6476	11.6725	11.675
ENSG00000027869.12 SH2D2A	2143.85	0.937631	0.0518149	18.0958	3.44025e-73	2.05828e-71	10.9749	11.0082	11.0119	10.945	11.7867	11.7378	11.6682	11.7177
ENSG00000107341.5 UBE2R2	5402.05	-0.832062	0.0460253	-18.0783	4.7202e-73	2.81739e-71	12.8915	12.8363	12.8991	12.8708	12.0784	12.1241	12.2062	12.0857
ENSG00000156735.11 BAG4	570.152	-1.45792	0.0806706	-18.0726	5.24277e-73	3.12192e-71	10.3914	10.4003	10.4067	10.4882	9.56605	9.65324	9.6404	9.65057
ENSG00000182378.15 PLCXD1	310.591	2.07526	0.114872	18.0658	5.92997e-73	3.51455e-71	9.08443	9.20285	9.09507	9.11457	10.0298	10.0162	9.98163	9.91789
ENSG00000182378.15_PAR_Y PLCXD1	310.591	2.07526	0.114872	18.0658	5.92997e-73	3.51455e-71	9.08443	9.20285	9.09507	9.11457	10.0298	10.0162	9.98163	9.91789
ENSG00000172201.12 ID4	252.606	-2.1872	0.121091	-18.0625	6.29431e-73	3.72175e-71	9.79618	9.84032	9.83047	9.89908	9.05254	8.97619	9.04603	8.98125
ENSG00000013297.12 CLDN11	2487.92	0.820408	0.0454339	18.0572	6.93032e-73	4.08824e-71	11.166	11.1956	11.2299	11.2313	11.899	11.8922	11.8509	11.8552
ENSG00000126603.9 GLIS2	728.973	-1.21654	0.0673967	-18.0505	7.82413e-73	4.60474e-71	10.6441	10.6221	10.5633	10.6084	9.87561	9.90287	9.88379	9.87509
ENSG00000181666.18 ZNF875	131.908	-3.85567	0.213893	-18.0262	1.21441e-72	7.13058e-71	9.53572	9.46884	9.52285	9.46897	8.53137	8.53433	8.56646	8.64384
ENSG00000028137.19 TNFRSF1B	486.35	1.49878	0.0831956	18.0151	1.48339e-72	8.6897e-71	9.48428	9.54115	9.51413	9.52311	10.3114	10.3218	10.2696	10.237
ENSG00000172794.20 RAB37	267.489	2.11483	0.117447	18.0067	1.72662e-72	1.00911e-70	9.06345	9.04695	9.06664	9.03914	9.9209	9.92899	9.82878	9.82581
ENSG00000136068.15 FLNB	16567.2	0.999931	0.0555681	17.9947	2.14355e-72	1.2499e-70	13.5196	13.4575	13.5034	13.5441	14.5858	14.5231	14.3979	14.3603
ENSG00000198910.14 L1CAM	3859.41	0.900149	0.0500296	17.9923	2.23842e-72	1.3022e-70	11.7362	11.695	11.626	11.6324	12.485	12.4894	12.46	12.3811
ENSG00000158470.5 B4GALT5	4263.88	0.831437	0.0462395	17.9811	2.74063e-72	1.5907e-70	11.7657	11.82	11.8747	11.8645	12.6159	12.5557	12.542	12.532
ENSG00000084710.14 EFR3B	257.424	-2.12696	0.118328	-17.9752	3.04984e-72	1.76611e-70	9.84456	9.8317	9.80616	9.91046	9.04309	9.07457	9.04603	8.98924
ENSG00000169122.11 FAM110B	454.596	1.8017	0.10026	17.9703	3.33142e-72	1.92475e-70	9.39222	9.33705	9.41929	9.39102	10.3296	10.3513	10.2004	10.1934
ENSG00000108932.12 SLC16A6	1277.06	1.78621	0.0994628	17.9586	4.10933e-72	2.36878e-70	10.0217	10.093	9.97047	10.2695	11.2157	11.2755	11.4173	11.3407
ENSG00000119638.14 NEK9	3665.39	0.807131	0.0449694	17.9485	4.93457e-72	2.838e-70	11.5962	11.6613	11.664	11.7236	12.3417	12.3596	12.3669	12.3627
ENSG00000228716.7 DHFR	809.215	1.76785	0.0985579	17.9372	6.04222e-72	3.46714e-70	9.68191	9.75482	9.81062	9.7715	10.9876	10.7945	10.6839	10.7795
ENSG00000166012.17 TAF1D	3682.55	-1.30185	0.0727309	-17.8996	1.18805e-71	6.80178e-70	12.4827	12.5138	12.4819	12.5563	11.2208	11.3437	11.5128	11.4788
ENSG00000145147.20 SLIT2	818.716	-1.37487	0.0768413	-17.8924	1.35166e-71	7.72095e-70	10.7397	10.6862	10.7219	10.8739	9.9073	9.93114	9.91089	9.90126
ENSG00000204592.9 HLA-E	6151.16	-0.782073	0.0437345	-17.8823	1.62104e-71	9.23886e-70	13.0591	13.008	13.0912	12.9632	12.2843	12.3266	12.3405	12.3204
ENSG00000166387.13 PPFIBP2	310.496	-1.91802	0.107288	-17.8773	1.77259e-71	1.00798e-69	9.99417	9.96096	9.99546	9.92173	9.11556	9.23602	9.14369	9.16833
ENSG00000125772.14 GPCPD1	883.432	-1.19865	0.0670748	-17.8704	2.00477e-71	1.13745e-69	10.8261	10.7914	10.723	10.8522	10.0156	10.0439	10.0561	10.0392
ENSG00000162105.20 SHANK2	572.483	1.6448	0.0920549	17.8675	2.1108e-71	1.19492e-69	9.54404	9.54564	9.54292	9.64011	10.5063	10.5142	10.4559	10.3437
ENSG00000197989.14 SNHG12	949.791	-1.49225	0.0835873	-17.8525	2.76186e-71	1.55999e-69	11.0055	10.8867	11.0346	10.8014	9.98667	9.92251	10.0017	10.0033
ENSG00000103126.15 AXIN1	3237.77	-1.00226	0.0561417	-17.8523	2.77151e-71	1.56195e-69	12.341	12.2566	12.2496	12.1842	11.4805	11.3853	11.3455	11.4358
ENSG00000140416.23 TPM1	3846.07	1.07543	0.0602687	17.8439	3.22199e-71	1.81178e-69	11.5238	11.5733	11.6135	11.5805	12.6246	12.499	12.3814	12.4956
ENSG00000120158.12 RCL1	1959.05	-0.961999	0.0539238	-17.84	3.45969e-71	1.94112e-69	11.6501	11.5909	11.6946	11.5689	10.8646	10.8674	10.8625	10.9175
ENSG00000169299.14 PGM2	1008.79	-1.14364	0.0641393	-17.8305	4.09501e-71	2.29248e-69	10.8744	10.9323	10.9109	10.9839	10.1395	10.1381	10.2029	10.1898
ENSG00000229953.1 AL590666.2	162.637	2.96041	0.166129	17.8199	4.94997e-71	2.76497e-69	8.69759	8.7803	8.71879	8.74298	9.61524	9.64774	9.56871	9.54284
ENSG00000156860.16 FBRS	4021.27	-0.771041	0.0433256	-17.7964	7.5344e-71	4.1993e-69	12.5272	12.477	12.4422	12.4133	11.7988	11.7987	11.7885	11.7862
ENSG00000134986.14 NREP	1218.92	1.09431	0.0615405	17.7819	9.75842e-71	5.42688e-69	10.3396	10.3191	10.3462	10.4179	11.0838	11.0815	11.124	11.176
ENSG00000159640.17 ACE	835.708	1.69843	0.095582	17.7693	1.2218e-70	6.77979e-69	9.79618	9.78583	9.78133	9.84733	10.9901	10.8901	10.6938	10.7601
ENSG00000164690.8 SHH	155.249	3.582	0.201717	17.7576	1.50645e-70	8.34099e-69	8.61826	8.66572	8.601	8.65803	9.63529	9.65871	9.46316	9.59608
ENSG00000129911.9 KLF16	2065.62	-0.94225	0.0530708	-17.7546	1.58802e-70	8.77336e-69	11.6574	11.6873	11.7615	11.6315	10.9185	10.9365	10.98	10.9348
ENSG00000083444.17 PLOD1	4949.16	0.732933	0.0412988	17.7471	1.81632e-70	1.00128e-68	12.0946	12.0379	12.1115	12.0335	12.7141	12.7528	12.6916	12.7392
ENSG00000204580.13 DDR1	23526.9	1.14375	0.0644499	17.7463	1.84165e-70	1.01303e-68	13.9672	13.9353	13.8848	13.7948	15.1579	15.0462	14.8797	14.9401
ENSG00000069812.11 HES2	467.12	1.60622	0.0905348	17.7415	2.00561e-70	1.10082e-68	9.47545	9.488	9.39656	9.47138	10.3448	10.2103	10.2591	10.2497
ENSG00000109917.11 ZPR1	3737.39	-0.91624	0.0516478	-17.7401	2.05439e-70	1.12515e-68	12.4429	12.4249	12.4829	12.3164	11.6282	11.5785	11.6522	11.6435
ENSG00000160877.6 NACC1	5065.34	-0.684211	0.0385737	-17.7377	2.14394e-70	1.17165e-68	12.7277	12.7637	12.726	12.7354	12.1598	12.1125	12.1425	12.0854
ENSG00000122778.10 KIAA1549	703.581	1.50981	0.0852021	17.7203	2.92188e-70	1.59334e-68	9.7405	9.78042	9.63269	9.83876	10.6534	10.647	10.6386	10.5891
ENSG00000116711.10 PLA2G4A	2330.17	-0.891058	0.0502896	-17.7185	3.01781e-70	1.6421e-68	11.781	11.7908	11.8647	11.8269	11.1129	11.0342	11.1009	11.1404
ENSG00000133961.20 NUMB	11197.6	-0.624999	0.0352815	-17.7146	3.23278e-70	1.75529e-68	13.7962	13.8067	13.8175	13.7457	13.1685	13.2186	13.2123	13.1943
ENSG00000176946.12 THAP4	3012.16	-1.02131	0.0577686	-17.6794	6.04736e-70	3.27648e-68	12.2488	12.1625	12.2016	12.0717	11.3799	11.3191	11.2553	11.3221
ENSG00000175550.8 DRAP1	11018.9	-1.06489	0.0602378	-17.6782	6.17838e-70	3.34029e-68	13.9758	13.8873	14.0315	13.7743	12.9803	12.9297	12.8585	12.8848
ENSG00000104885.18 DOT1L	5548.15	0.966496	0.0546941	17.6709	7.02076e-70	3.78761e-68	12.1301	12.0783	11.9998	12.1153	12.9918	13.039	12.9051	12.8724
ENSG00000150893.11 FREM2	269.838	2.56447	0.145293	17.6504	1.01063e-69	5.44061e-68	8.87793	8.95042	8.91678	9.07779	9.96825	9.88959	9.96433	9.86257
ENSG00000140406.4 TLNRD1	2311.73	-0.881755	0.0499641	-17.6478	1.05859e-69	5.68665e-68	11.8303	11.786	11.8541	11.7419	11.0767	11.0823	11.1295	11.0855
ENSG00000162522.11 KIAA1522	2151.05	0.867239	0.0491587	17.6416	1.18019e-69	6.32644e-68	11.0386	11.044	11.0022	11.0043	11.7451	11.7529	11.6797	11.6689
ENSG00000105974.13 CAV1	2042.81	0.841661	0.0477203	17.6374	1.27253e-69	6.80697e-68	10.9867	10.9353	11.0075	10.9923	11.6448	11.6464	11.6659	11.6092
ENSG00000116285.13 ERRFI1	55605.1	-0.576761	0.0327121	-17.6314	1.41339e-69	7.54445e-68	16.0363	15.9866	16.076	16.0421	15.4832	15.4582	15.4562	15.4629
ENSG00000123989.14 CHPF	4022.59	-0.721629	0.0409727	-17.6124	1.97716e-69	1.05315e-67	12.464	12.4513	12.4738	12.4071	11.855	11.8263	11.7911	11.8059
ENSG00000181222.19 POLR2A	12526.8	-0.900017	0.0511424	-17.5983	2.54003e-69	1.35012e-67	14.1442	14.0769	13.958	13.9953	13.1957	13.2098	13.2226	13.1231
ENSG00000050165.18 DKK3	3270.89	-0.943052	0.0535929	-17.5966	2.61631e-69	1.38774e-67	12.2448	12.2207	12.2885	12.2603	11.5189	11.5032	11.3578	11.4415
ENSG00000185215.11 TNFAIP2	1637.65	1.14459	0.0651004	17.5819	3.39185e-69	1.79534e-67	10.5456	10.5969	10.6744	10.6288	11.4073	11.4222	11.4516	11.5666
ENSG00000179222.18 MAGED1	3923.49	-0.87509	0.0498402	-17.5579	5.17216e-69	2.73194e-67	12.5064	12.5034	12.4971	12.3586	11.7216	11.6969	11.7158	11.6935
ENSG00000065534.19 MYLK	636.311	1.5865	0.0904924	17.5319	8.1776e-69	4.3104e-67	9.6258	9.70566	9.54292	9.7382	10.5864	10.5516	10.5575	10.4937
ENSG00000270800.3 RPS10-NUDT3	802.451	-1.27231	0.0726473	-17.5135	1.13024e-68	5.94505e-67	10.6846	10.7339	10.7295	10.723	9.9976	9.83725	9.96228	9.93133
ENSG00000033170.17 FUT8	6211.04	-0.734272	0.0419847	-17.489	1.73639e-68	9.11445e-67	12.9747	13.0167	13.0449	13.0725	12.3199	12.3505	12.352	12.4056
ENSG00000170909.13 OSCAR	1663.95	-1.19664	0.0684378	-17.4851	1.85959e-68	9.74083e-67	11.5242	11.5365	11.5276	11.3915	10.4965	10.6059	10.624	10.6715
ENSG00000115368.10 WDR75	2488.48	-1.09238	0.0625522	-17.4634	2.72049e-68	1.42209e-66	11.9518	11.9417	12.0599	11.8566	11.027	11.0333	11.0606	11.1487
ENSG00000071462.12 BUD23	3322.22	-0.858333	0.0491534	-17.4623	2.77328e-68	1.44669e-66	12.3065	12.2366	12.2703	12.1754	11.5019	11.5672	11.4855	11.5195
ENSG00000095951.17 HIVEP1	993.361	-1.1365	0.0652402	-17.4203	5.78851e-68	3.01337e-66	10.9388	10.8958	10.8452	10.9494	10.1427	10.1253	10.2097	10.1532
ENSG00000198585.12 NUDT16	1064.58	1.01925	0.0585103	17.42	5.8222e-68	3.02467e-66	10.2701	10.2944	10.2113	10.2863	10.9364	10.9454	10.9624	10.9674
ENSG00000213977.8 TAX1BP3	2907.73	-0.741613	0.0425874	-17.4139	6.4725e-68	3.3556e-66	12.0581	12.0115	12.0376	12.0631	11.3896	11.4472	11.4145	11.4396
ENSG00000175309.15 PHYKPL	1682.18	0.897306	0.0515367	17.411	6.80719e-68	3.52188e-66	10.7729	10.7625	10.7099	10.7569	11.4739	11.4341	11.3898	11.4218
ENSG00000166396.13 SERPINB7	133.524	-3.90468	0.224465	-17.3955	8.92435e-68	4.60781e-66	9.4066	9.51376	9.58739	9.51389	8.53137	8.56295	8.5459	8.63621
ENSG00000131409.13 LRRC4B	510.449	1.4654	0.0843357	17.3758	1.25944e-67	6.48947e-66	9.52732	9.5434	9.58194	9.57235	10.4013	10.2981	10.2839	10.3036
ENSG00000147533.17 GOLGA7	1321.07	-0.981364	0.0564881	-17.3729	1.32284e-67	6.80226e-66	11.1694	11.163	11.2284	11.1501	10.463	10.4645	10.4545	10.5284
ENSG00000255717.7 SNHG1	2016.21	-1.06568	0.0613494	-17.3707	1.37421e-67	7.05206e-66	11.7242	11.7237	11.7355	11.5685	10.8374	10.8579	10.8245	10.9127
ENSG00000152894.15 PTPRK	2205.95	-0.885421	0.0509729	-17.3704	1.38236e-67	7.07945e-66	11.7385	11.7221	11.7021	11.8218	11.0312	11.0779	11.0345	11.0264
ENSG00000120068.7 HOXB8	581.497	1.36591	0.0786478	17.3674	1.45586e-67	7.44079e-66	9.73182	9.65828	9.65336	9.64421	10.4131	10.3772	10.4545	10.4492
ENSG00000145349.17 CAMK2D	1330.42	-1.45929	0.0840346	-17.3653	1.50977e-67	7.70072e-66	11.1848	11.2511	11.2958	11.4486	10.1963	10.2475	10.3609	10.2781
ENSG00000142227.11 EMP3	3067.29	-0.914122	0.0526722	-17.3549	1.8108e-67	9.21758e-66	12.2357	12.1588	12.1952	12.0611	11.4155	11.3918	11.3873	11.39
ENSG00000023445.16 BIRC3	2306.22	-1.65455	0.0955591	-17.3145	3.65985e-67	1.85924e-65	11.8516	11.9688	11.8898	12.2363	10.5692	10.6845	10.7524	10.7663
ENSG00000179094.16 PER1	2986.93	-0.942802	0.0544525	-17.3142	3.67619e-67	1.86378e-65	12.2054	12.1346	12.1343	12.0792	11.4193	11.3482	11.3621	11.2708
ENSG00000183250.12 LINC01547	161.335	3.10133	0.179252	17.3016	4.57857e-67	2.31663e-65	8.72317	8.75569	8.67367	8.68817	9.62029	9.63945	9.48548	9.63336
ENSG00000167193.8 CRK	3450.82	-0.707365	0.0408912	-17.2987	4.80842e-67	2.42806e-65	12.2205	12.2517	12.2649	12.256	11.607	11.6296	11.6705	11.6546
ENSG00000155975.10 VPS37A	816.378	-1.2865	0.0744151	-17.2882	5.77334e-67	2.90948e-65	10.6871	10.7516	10.7132	10.7957	9.85332	9.9878	9.97251	9.95193
ENSG00000166450.13 PRTG	422.578	1.82527	0.105644	17.2776	6.94022e-67	3.49057e-65	9.29841	9.40131	9.34247	9.32039	10.0951	10.2189	10.2973	10.2184
ENSG00000085063.17 CD59	10701.5	-0.797126	0.046144	-17.2747	7.29036e-67	3.65938e-65	13.801	13.7958	13.8409	13.7257	13.1203	13.037	12.984	13.0071
ENSG00000197903.8 H2BC12	888.73	-1.2772	0.0739492	-17.2713	7.73656e-67	3.87565e-65	10.8843	10.7791	10.8804	10.7417	9.99941	9.96294	10.0311	10.05
ENSG00000132003.9 ZSWIM4	1711.07	0.870385	0.0504338	17.258	9.75002e-67	4.87462e-65	10.7752	10.7824	10.7413	10.8231	11.4672	11.4561	11.431	11.4136
ENSG00000152492.15 CCDC50	3691.44	1.14346	0.0662871	17.2501	1.11747e-66	5.57587e-65	11.3786	11.4755	11.4925	11.5967	12.3915	12.4161	12.5755	12.483
ENSG00000197555.9 SIPA1L1	10042	0.867375	0.0503146	17.239	1.35292e-66	6.73737e-65	12.8587	12.9258	12.8441	13.0078	13.7725	13.7666	13.6912	13.6797
ENSG00000168874.13 ATOH8	144.246	-2.86747	0.166412	-17.2312	1.54994e-66	7.70331e-65	9.54612	9.46156	9.51413	9.53677	8.72414	8.71739	8.71271	8.73222
ENSG00000111057.11 KRT18	10155.2	0.893381	0.0518945	17.2153	2.03743e-66	1.01063e-64	12.943	12.8449	13.0081	12.8385	13.8099	13.707	13.717	13.772
ENSG00000203875.13 SNHG5	1732.77	-1.33809	0.077731	-17.2143	2.07385e-66	1.02668e-64	11.6606	11.5701	11.6479	11.4204	10.5172	10.5088	10.6055	10.6539
ENSG00000042286.15 AIFM2	719.686	1.32904	0.0772395	17.2067	2.36481e-66	1.16843e-64	9.80111	9.91029	9.80616	9.81092	10.6771	10.5738	10.583	10.6446
ENSG00000090273.14 NUDC	5874.74	-0.786233	0.0457309	-17.1926	3.01727e-66	1.48789e-64	12.9947	12.9414	13.043	12.8998	12.2958	12.2484	12.2439	12.2405
ENSG00000146416.19 AIG1	1262.49	1.08547	0.0631456	17.1899	3.1592e-66	1.55485e-64	10.3386	10.341	10.4473	10.4382	11.2026	11.1271	11.1609	11.1207
ENSG00000130700.7 GATA5	351.622	2.00422	0.116611	17.1873	3.3053e-66	1.62359e-64	9.22328	9.13574	9.18718	9.24386	10.1808	10.1124	10.0056	10.0075
ENSG00000134824.14 FADS2	6032.86	0.688167	0.0400486	17.1833	3.54258e-66	1.73676e-64	12.3332	12.3575	12.3502	12.3408	13.0112	12.9644	12.9112	13.0006
ENSG00000061656.11 SPAG4	747.385	1.43381	0.083537	17.1637	4.96173e-66	2.42778e-64	9.88339	9.81428	9.85427	9.73255	10.752	10.6384	10.6111	10.7036
ENSG00000125089.17 SH3TC1	365.363	1.80619	0.105364	17.1423	7.17129e-66	3.50011e-64	9.20863	9.28577	9.29243	9.29172	10.1314	10.1471	10.0145	10.0459
ENSG00000169604.21 ANTXR1	3897.16	1.15648	0.0674636	17.1423	7.18099e-66	3.50011e-64	11.4744	11.525	11.47	11.6914	12.6353	12.5586	12.4907	12.4825
ENSG00000204262.14 COL5A2	1719.75	-1.66954	0.0974129	-17.1388	7.61604e-66	3.70501e-64	11.5962	11.5202	11.6602	11.7661	10.5784	10.4432	10.2696	10.3244
ENSG00000144834.14 TAGLN3	322.039	-1.85292	0.108232	-17.1198	1.05623e-65	5.12842e-64	10.0025	9.94692	10.0567	9.95647	9.22839	9.11927	9.1927	9.23757
ENSG00000164741.15 DLC1	947.696	-1.25708	0.0735645	-17.0881	1.81989e-65	8.8193e-64	10.8385	10.9213	10.8172	10.9581	10.1051	10.0162	10.1218	10.0392
ENSG00000013016.16 EHD3	851.252	1.04221	0.0610165	17.0808	2.06163e-65	9.97167e-64	10.0931	10.0606	10.0494	10.0693	10.7306	10.728	10.726	10.723
ENSG00000178401.16 DNAJC22	200.453	2.25179	0.131871	17.0756	2.2542e-65	1.08822e-63	8.88718	8.93215	8.91678	8.94598	9.71893	9.63667	9.69218	9.68972
ENSG00000164683.18 HEY1	5396.26	-0.841805	0.0493137	-17.0704	2.46496e-65	1.1877e-63	12.8247	12.8463	12.9326	12.8994	12.0559	12.0882	12.1275	12.1957
ENSG00000143420.19 ENSA	4722.75	0.789396	0.046254	17.0665	2.63385e-65	1.26665e-63	11.9636	12.023	12.0097	11.9229	12.7239	12.7023	12.6186	12.6818
ENSG00000121281.13 ADCY7	1883.82	-0.947242	0.0555107	-17.0641	2.74441e-65	1.31732e-63	11.6117	11.5761	11.4844	11.6248	10.8515	10.8642	10.8112	10.8572
ENSG00000164484.12 TMEM200A	1702.23	-1.0308	0.060422	-17.06	2.94485e-65	1.41084e-63	11.4093	11.4539	11.4925	11.5619	10.6739	10.6797	10.7607	10.6872
ENSG00000129083.13 COPB1	7496.67	-0.714392	0.0419044	-17.0481	3.60779e-65	1.72518e-63	13.2623	13.2646	13.3292	13.2416	12.5535	12.6024	12.6441	12.648
ENSG00000135048.14 CEMIP2	1427.08	1.04159	0.0611161	17.0428	3.95133e-65	1.88588e-63	10.5274	10.5273	10.4513	10.5849	11.3168	11.3206	11.2599	11.2231
ENSG00000160255.18 ITGB2	224.031	2.52867	0.148408	17.0386	4.24591e-65	2.02266e-63	8.94001	8.90856	8.80525	8.93684	9.82222	9.80419	9.67255	9.83067
ENSG00000204387.14 SNHG32	7536	-1.0294	0.0604673	-17.0241	5.43805e-65	2.58568e-63	13.4575	13.3566	13.4705	13.2507	12.4758	12.4038	12.3627	12.4981
ENSG00000110660.15 SLC35F2	1650.77	-0.876234	0.0515643	-16.993	9.24762e-65	4.38879e-63	11.3692	11.4102	11.4026	11.425	10.789	10.7082	10.7568	10.7133
ENSG00000183963.19 SMTN	5757.6	-1.06871	0.0628962	-16.9917	9.4589e-65	4.48064e-63	13.0829	13.0168	13.0816	12.9499	12.1932	12.1095	12.0017	11.9653
ENSG00000144802.11 NFKBIZ	1339.54	1.20028	0.0706632	16.986	1.04336e-64	4.93309e-63	10.3771	10.3191	10.3563	10.5176	11.2828	11.263	11.2073	11.2375
ENSG00000003249.15 DBNDD1	989.683	1.13595	0.0669015	16.9794	1.16708e-64	5.50773e-63	10.1775	10.1178	10.2161	10.1139	10.9687	10.887	10.8889	10.8644
ENSG00000168781.22 PPIP5K1	722.31	1.39869	0.0825891	16.9355	2.4618e-64	1.15962e-62	9.73356	9.77861	9.83701	9.88924	10.7005	10.6507	10.6148	10.5784
ENSG00000170561.13 IRX2	3146.58	-1.06733	0.0630443	-16.9298	2.71087e-64	1.27456e-62	12.2128	12.2148	12.3069	12.2339	11.2135	11.3123	11.4245	11.4102
ENSG00000128590.5 DNAJB9	990.803	-1.37483	0.0812097	-16.9294	2.73011e-64	1.28122e-62	10.9184	10.9316	10.9862	10.9931	9.95892	9.9878	10.1254	10.1482
ENSG00000170949.17 ZNF160	342.213	-1.75463	0.103671	-16.9249	2.94964e-64	1.38168e-62	10.0724	9.92795	10.0512	10.0507	9.23962	9.25263	9.26919	9.24333
ENSG00000100219.16 XBP1	4988.48	-0.87417	0.0517554	-16.8904	5.29433e-64	2.47539e-62	12.7996	12.7603	12.8768	12.6871	12.0071	11.9599	12.0354	12.0018
ENSG00000137801.11 THBS1	441.968	2.05584	0.121879	16.868	7.7429e-64	3.61355e-62	9.24622	9.27397	9.31779	9.34819	10.4618	10.2291	10.1634	10.237
ENSG00000164307.13 ERAP1	2412.1	0.951396	0.056411	16.8654	8.08277e-64	3.7652e-62	11.0285	11.0762	11.1118	11.2038	11.886	11.8962	11.8415	11.8782
ENSG00000136378.15 ADAMTS7	531.215	1.38405	0.0820735	16.8635	8.34795e-64	3.88157e-62	9.59266	9.60663	9.57645	9.64829	10.317	10.4128	10.3489	10.2992
ENSG00000239445.6 ST3GAL6-AS1	255.171	-1.97974	0.117403	-16.8628	8.4531e-64	3.92323e-62	9.77792	9.8386	9.8776	9.82318	9.00902	9.08473	9.10126	9.05741
ENSG00000197461.13 PDGFA	1319.69	1.06538	0.0632149	16.8533	9.92266e-64	4.59683e-62	10.5025	10.397	10.4854	10.374	11.2099	11.2336	11.1968	11.1504
ENSG00000163629.13 PTPN13	1357.15	1.26652	0.0751959	16.843	1.18149e-63	5.46341e-62	10.3512	10.3959	10.2676	10.4852	11.1982	11.2863	11.2794	11.3443
ENSG00000184347.15 SLIT3	1064.34	1.2176	0.0724031	16.8169	1.83512e-63	8.47039e-62	10.1715	10.1327	10.2193	10.2126	11.1059	11.0062	10.9359	10.941
ENSG00000132589.16 FLOT2	1583.13	1.14598	0.0681617	16.8126	1.97182e-63	9.08478e-62	10.5804	10.6369	10.5754	10.5095	11.4983	11.4765	11.3158	11.4048
ENSG00000187555.16 USP7	4486.71	-0.686628	0.0408652	-16.8023	2.3485e-63	1.08005e-61	12.5857	12.5391	12.56	12.6328	11.9842	11.9493	11.9806	11.9742
ENSG00000145247.12 OCIAD2	1733.85	-1.34449	0.0800335	-16.799	2.48051e-63	1.13869e-61	11.6021	11.5037	11.7366	11.4613	10.561	10.5047	10.5536	10.659
ENSG00000198890.9 PRMT6	443.651	1.65662	0.0986477	16.7933	2.73402e-63	1.25278e-61	9.35532	9.4319	9.43205	9.43952	10.3365	10.2086	10.1704	10.1934
ENSG00000039139.10 DNAH5	274.926	2.02813	0.120879	16.7782	3.52251e-63	1.61116e-61	9.15366	9.05086	9.02698	9.0964	9.89156	9.90287	9.82418	9.93725
ENSG00000035403.18 VCL	7639.83	0.643719	0.0383922	16.7669	4.26096e-63	1.9454e-61	12.6212	12.6688	12.6964	12.7228	13.2805	13.2547	13.2793	13.2829
ENSG00000067798.16 NAV3	258.793	-2.60494	0.155389	-16.764	4.47408e-63	2.03902e-61	9.7353	9.87249	9.89221	10.0565	8.92987	8.89521	8.98062	8.92684
ENSG00000175928.6 LRRN1	108.144	-4.50589	0.268882	-16.7579	4.95787e-63	2.25543e-61	9.36032	9.37772	9.42888	9.42699	8.45358	8.46661	8.49156	8.50746
ENSG00000059122.17 FLYWCH1	2069.7	-0.819681	0.0489363	-16.75	5.66657e-63	2.5693e-61	11.6755	11.6294	11.6816	11.6149	11.0443	11.0165	10.9917	10.968
ENSG00000198791.12 CNOT7	1836.35	-1.00195	0.059818	-16.7499	5.66817e-63	2.5693e-61	11.5295	11.5139	11.5829	11.6167	10.712	10.8474	10.8397	10.7648
ENSG00000182158.15 CREB3L2	3517.31	0.867005	0.0517764	16.7452	6.13828e-63	2.77741e-61	11.5567	11.5682	11.5439	11.6536	12.286	12.3045	12.4067	12.295
ENSG00000140577.16 CRTC3	1335.15	-0.910164	0.0543685	-16.7406	6.62703e-63	2.99319e-61	11.1516	11.1548	11.1842	11.1965	10.5063	10.4868	10.562	10.5135
ENSG00000171490.13 RSL1D1	4590.65	-0.949425	0.0567673	-16.7249	8.63888e-63	3.8949e-61	12.6857	12.6402	12.8271	12.6252	11.8375	11.8121	11.8917	11.8824
ENSG00000126778.12 SIX1	1317.65	-0.951011	0.0568689	-16.7229	8.93082e-63	4.01935e-61	11.1091	11.1889	11.1857	11.1861	10.4668	10.4546	10.5023	10.5256
ENSG00000244509.4 APOBEC3C	4061.93	0.928909	0.0555797	16.7131	1.05206e-62	4.72639e-61	11.6847	11.7115	11.7692	11.7105	12.6286	12.5693	12.4575	12.4561
ENSG00000137497.18 NUMA1	4053.11	-0.840108	0.0502846	-16.7071	1.16424e-62	5.22111e-61	12.5228	12.4924	12.4374	12.5372	11.8472	11.7743	11.7119	11.7282
ENSG00000142687.18 KIAA0319L	2353.1	0.949339	0.0568248	16.7064	1.17697e-62	5.26882e-61	11.0783	11.1264	11.0224	11.0883	11.9263	11.8724	11.7783	11.7993
ENSG00000100994.12 PYGB	7598.07	-0.673605	0.0403391	-16.6986	1.3422e-62	5.99785e-61	13.2578	13.2781	13.3204	13.2537	12.6734	12.6784	12.5906	12.6719
ENSG00000006459.11 KDM7A	2799.46	-1.44431	0.0865265	-16.6921	1.49576e-62	6.67227e-61	12.1683	12.1502	12.1303	12.3122	10.8628	10.9611	11.2029	10.984
ENSG00000067082.15 KLF6	3575.56	0.818434	0.0490527	16.6848	1.69132e-62	7.53131e-61	11.5581	11.5973	11.675	11.6737	12.287	12.3139	12.3572	12.3575
ENSG00000132613.15 MTSS2	2122.03	-0.840931	0.0505176	-16.6463	3.2188e-62	1.43078e-60	11.7506	11.66	11.6788	11.6598	10.9842	11.0043	11.0436	11.05
ENSG00000137767.14 SQOR	2566.75	0.874382	0.0525363	16.6434	3.37897e-62	1.49934e-60	11.2084	11.2429	11.2567	11.1482	11.9463	11.8694	11.9103	11.9872
ENSG00000140521.17 POLG	3569.84	-0.734788	0.0441505	-16.6428	3.41157e-62	1.51115e-60	12.3277	12.3244	12.2699	12.2755	11.7043	11.6992	11.6467	11.6239
ENSG00000174780.17 SRP72	5938.1	-0.711072	0.0427426	-16.6361	3.81411e-62	1.68649e-60	12.9184	12.9548	12.9929	12.9714	12.2723	12.2679	12.3472	12.358
ENSG00000099840.14 IZUMO4	255.605	2.19357	0.131878	16.6334	3.99241e-62	1.75917e-60	9.05633	9.04301	9.06664	8.9038	9.81167	9.88289	9.82187	9.88285
ENSG00000157045.9 NTAN1	1050.09	-0.970378	0.058339	-16.6335	3.98939e-62	1.75917e-60	10.9368	10.9168	10.9683	10.8816	10.2771	10.2803	10.2744	10.2646
ENSG00000175592.9 FOSL1	9388.01	-1.17281	0.0705119	-16.6328	4.03038e-62	1.7728e-60	13.7476	13.7073	13.8323	13.6308	12.7981	12.6615	12.5108	12.5503
ENSG00000116729.14 WLS	8211.63	0.600853	0.0362038	16.5964	7.40122e-62	3.24985e-60	12.7967	12.7605	12.8424	12.7865	13.3605	13.3509	13.3371	13.3779
ENSG00000250366.3 TUNAR	539.885	1.48229	0.0893729	16.5855	8.87328e-62	3.88735e-60	9.6181	9.54788	9.58194	9.5897	10.4026	10.4025	10.2672	10.4284
ENSG00000152784.16 PRDM8	2843.85	-0.82308	0.0496267	-16.5854	8.88388e-62	3.88735e-60	12.0645	12.098	12.0175	11.9813	11.3012	11.3853	11.3653	11.3706
ENSG00000245532.9 NEAT1	2011.29	1.24577	0.0751142	16.5851	8.93856e-62	3.90451e-60	10.7821	10.8905	10.6065	10.7727	11.7387	11.6642	11.7679	11.7613
ENSG00000092820.18 EZR	3659.74	-0.854748	0.0516743	-16.5411	1.85713e-61	8.09826e-60	12.4302	12.3227	12.4274	12.3	11.6691	11.6229	11.6557	11.5887
ENSG00000172037.14 LAMB2	7851.55	0.768622	0.0464691	16.5405	1.87481e-61	8.16125e-60	12.6965	12.6426	12.6103	12.6187	13.4295	13.3835	13.3216	13.2883
ENSG00000072840.13 EVC	1324.53	-1.10363	0.0667677	-16.5294	2.25191e-61	9.78591e-60	11.2134	11.237	11.1003	11.2849	10.4222	10.4868	10.3999	10.4072
ENSG00000126870.16 DYNC2I1	437.191	1.39704	0.0846181	16.5099	3.11156e-61	1.34984e-59	9.47545	9.51838	9.45708	9.48337	10.1539	10.1561	10.1816	10.2136
ENSG00000007545.16 CRAMP1	1682.64	-0.847113	0.0513321	-16.5026	3.51506e-61	1.52227e-59	11.4247	11.416	11.3926	11.425	10.747	10.8421	10.7535	10.7617
ENSG00000198742.10 SMURF1	1939.28	-0.773608	0.0469306	-16.4841	4.77465e-61	2.06422e-59	11.5371	11.5612	11.57	11.5703	10.9994	10.9405	10.9519	10.9355
ENSG00000105290.13 APLP1	581.673	1.32915	0.0806592	16.4786	5.22799e-61	2.25635e-59	9.65981	9.68813	9.67113	9.71352	10.478	10.4574	10.3713	10.3628
ENSG00000154310.17 TNIK	1466.89	1.16907	0.0709989	16.466	6.43562e-61	2.77281e-59	10.4855	10.5233	10.3761	10.5782	11.2696	11.4117	11.3524	11.3371
ENSG00000154783.12 FGD5	210.229	2.11509	0.128461	16.4648	6.56628e-61	2.82428e-59	8.9567	9.01485	8.95177	8.92757	9.67192	9.74522	9.71655	9.68789
ENSG00000103942.13 HOMER2	1540.01	-0.821703	0.0499898	-16.4374	1.03221e-60	4.43217e-59	11.3052	11.3101	11.3044	11.3098	10.6545	10.694	10.7208	10.7141
ENSG00000145555.15 MYO10	14158.5	-0.955553	0.0582662	-16.3998	1.91922e-60	8.22691e-59	14.2268	14.1689	14.1441	14.3868	13.3043	13.3584	13.3561	13.2594
ENSG00000167889.13 MGAT5B	755.577	1.13019	0.0689505	16.3913	2.20497e-60	9.41982e-59	9.92688	9.96714	9.93499	9.93448	10.6803	10.6297	10.5722	10.6275
ENSG00000114270.18 COL7A1	18126.8	0.844683	0.051532	16.3914	2.20251e-60	9.41982e-59	13.7589	13.729	13.5922	13.8187	14.5641	14.5479	14.5073	14.5557
ENSG00000069188.17 SDK2	794.439	1.52489	0.0930333	16.3908	2.22544e-60	9.49122e-59	9.87264	9.81076	9.68365	9.94395	10.7026	10.7868	10.7799	10.7539
ENSG00000147548.17 NSD3	2208.72	-1.05201	0.0641876	-16.3896	2.26969e-60	9.66361e-59	11.7766	11.7856	11.7239	11.8964	10.8905	10.9226	11.0458	10.9754
ENSG00000220635.2 KRASP1	1590.7	1.58256	0.0965627	16.3889	2.29596e-60	9.75897e-59	10.2521	10.3261	10.3448	10.5667	11.4061	11.4999	11.6201	11.5818
ENSG00000054356.14 PTPRN	4473.68	-0.785071	0.0479046	-16.3882	2.32151e-60	9.85103e-59	12.6423	12.616	12.5963	12.5793	11.9528	11.9846	11.8476	11.8793
ENSG00000163132.8 MSX1	1915.4	1.08274	0.0660846	16.3841	2.48392e-60	1.05225e-58	10.6911	10.8228	10.9119	10.7586	11.5855	11.65	11.6417	11.6501
ENSG00000214530.10 STARD10	834.686	-1.4562	0.0889253	-16.3755	2.85934e-60	1.20926e-58	10.8443	10.7963	10.889	10.6279	9.86756	9.91382	9.86053	9.9402
ENSG00000114251.15 WNT5A	2315.9	1.17573	0.0718545	16.3626	3.53499e-60	1.4925e-58	10.8638	10.895	10.926	11.1014	11.8337	11.8704	11.9652	11.8761
ENSG00000196535.17 MYO18A	1278.16	1.04022	0.0635768	16.3616	3.59413e-60	1.51493e-58	10.4256	10.4705	10.323	10.4603	11.1656	11.168	11.1831	11.1093
ENSG00000085733.16 CTTN	3626.8	1.03741	0.0634276	16.3557	3.95924e-60	1.66605e-58	11.5979	11.5178	11.4579	11.5195	12.5164	12.4798	12.3176	12.3396
ENSG00000187017.17 ESPN	1054.86	1.007	0.0615762	16.3537	4.0919e-60	1.71901e-58	10.2521	10.298	10.263	10.2364	10.9918	10.9611	10.9129	10.8937
ENSG00000139970.17 RTN1	1896.26	1.19948	0.0733602	16.3505	4.31372e-60	1.80918e-58	10.7389	10.6801	10.7844	10.7135	11.7727	11.7038	11.5093	11.6054
ENSG00000197457.10 STMN3	3287.4	1.21051	0.0740431	16.3487	4.44394e-60	1.86071e-58	11.3104	11.3157	11.4066	11.2266	12.4965	12.3199	12.1923	12.3248
ENSG00000176399.4 DMRTA1	242.955	-1.85457	0.113511	-16.3382	5.27863e-60	2.20654e-58	9.75083	9.80723	9.77675	9.78958	9.07109	9.06944	9.10368	9.04648
ENSG00000131389.17 SLC6A6	4966.79	1.09016	0.0668158	16.3159	7.61294e-60	3.17705e-58	11.8597	11.8582	11.8376	11.9348	12.9922	12.8866	12.7753	12.7028
ENSG00000170421.12 KRT8	2098.32	-1.03576	0.0635214	-16.3057	8.98356e-60	3.74285e-58	11.7669	11.6864	11.8006	11.658	11.0011	10.8881	10.8386	10.93
ENSG00000196083.10 IL1RAP	1728.74	1.17954	0.072371	16.2985	1.01149e-59	4.20727e-58	10.5438	10.6221	10.6345	10.7818	11.4965	11.5104	11.599	11.5352
ENSG00000099869.8 IGF2-AS	240.808	2.12867	0.130613	16.2976	1.02702e-59	4.26482e-58	9.03454	9.00243	8.93451	9.05872	9.712	9.86485	9.81258	9.81439
ENSG00000196139.14 AKR1C3	232.408	-1.95502	0.119973	-16.2955	1.06273e-59	4.40587e-58	9.75425	9.76586	9.75827	9.75126	9.05254	9.09476	8.98631	9.02034
ENSG00000103145.11 HCFC1R1	905.44	-1.34707	0.0827013	-16.2883	1.19449e-59	4.944e-58	10.885	10.8512	10.889	10.7916	10.1362	9.94183	9.94262	9.97648
ENSG00000177383.5 MAGEF1	2040.46	0.848709	0.0521058	16.2882	1.19745e-59	4.94817e-58	10.9341	10.9557	10.988	11.0237	11.6649	11.6181	11.5975	11.6883
ENSG00000130956.14 HABP4	469.16	-1.46937	0.0903376	-16.2653	1.74008e-59	7.17868e-58	10.2889	10.2073	10.2979	10.2024	9.48046	9.45489	9.50112	9.56775
ENSG00000167034.10 NKX3-1	418.368	-1.36816	0.0841637	-16.256	2.0267e-59	8.34749e-58	10.1496	10.13	10.1219	10.141	9.46595	9.42801	9.47438	9.49116
ENSG00000133048.13 CHI3L1	120.314	3.35701	0.206532	16.2541	2.08772e-59	8.58482e-58	8.60195	8.65009	8.57736	8.6255	9.46595	9.48429	9.37379	9.39379
ENSG00000126217.21 MCF2L	394.195	1.51232	0.093148	16.2357	2.81955e-59	1.15753e-57	9.3273	9.43441	9.39327	9.40917	10.085	10.1435	10.1182	10.0832
ENSG00000137819.14 PAQR5	775.512	-1.21973	0.0751389	-16.233	2.94564e-59	1.20733e-57	10.6441	10.6396	10.6879	10.7221	9.88561	9.86029	9.98667	9.96499
ENSG00000187678.10 SPRY4	8152.75	0.7238	0.0446644	16.2053	4.62653e-59	1.8932e-57	12.7414	12.7262	12.7076	12.6957	13.462	13.4069	13.3916	13.3035
ENSG00000115806.13 GORASP2	4813.26	-0.799626	0.0493584	-16.2004	5.00918e-59	2.04647e-57	12.6924	12.7351	12.7768	12.6356	11.9381	11.9832	12.0396	12.0282
ENSG00000105643.10 ARRDC2	1638.97	-1.03056	0.063657	-16.1893	6.00233e-59	2.44825e-57	11.429	11.479	11.4386	11.3894	10.7611	10.6869	10.5887	10.624
ENSG00000124151.19 NCOA3	3778.97	-0.828361	0.0511904	-16.182	6.76081e-59	2.75318e-57	12.3463	12.4087	12.3688	12.49	11.6325	11.6719	11.7253	11.7141
ENSG00000138709.19 LARP1B	993.612	-1.01633	0.0628153	-16.1797	7.0145e-59	2.85189e-57	10.8573	10.845	10.9081	10.9081	10.1427	10.2307	10.2305	10.2207
ENSG00000168297.16 PXK	872.749	-1.01491	0.0627826	-16.1654	8.84358e-59	3.58975e-57	10.7568	10.7322	10.7677	10.7204	10.1068	10.1363	10.0618	10.0988
ENSG00000051523.11 CYBA	3534.95	0.954999	0.0590779	16.1651	8.89328e-59	3.60413e-57	11.5581	11.5413	11.6238	11.4292	12.4289	12.3603	12.2858	12.3522
ENSG00000138646.9 HERC5	919.237	-1.05576	0.0653125	-16.1648	8.93309e-59	3.61447e-57	10.8076	10.7799	10.8462	10.7973	10.1117	10.1106	10.0889	10.1922
ENSG00000165434.8 PGM2L1	1080.82	-1.65784	0.102805	-16.1261	1.67227e-58	6.75545e-57	10.9669	11.1116	11.0137	11.3047	9.90535	10.0182	10.1009	10.02
ENSG00000130702.15 LAMA5	11087.1	1.1069	0.0686484	16.1243	1.7231e-58	6.94965e-57	12.9404	12.9041	12.7281	12.9951	13.9824	14.0526	13.9011	13.8227
ENSG00000127837.10 AAMP	3141.71	-0.873134	0.0541636	-16.1203	1.83664e-58	7.39577e-57	12.2137	12.1564	12.2572	12.0954	11.49	11.4159	11.4034	11.4699
ENSG00000179163.12 FUCA1	655.257	1.36609	0.0847648	16.1162	1.96214e-58	7.88856e-57	9.80602	9.77861	9.68862	9.73066	10.5703	10.5101	10.4538	10.6093
ENSG00000182934.12 SRPRA	5943.24	-0.706647	0.043861	-16.1111	2.13335e-58	8.56326e-57	12.9755	12.9975	12.9903	12.8676	12.3239	12.3229	12.3107	12.308
ENSG00000127472.11 PLA2G5	199.318	-2.19128	0.136057	-16.1056	2.33041e-58	9.33939e-57	9.63345	9.66632	9.69849	9.71352	8.86501	8.90835	8.97776	8.94406
ENSG00000178585.15 CTNNBIP1	1418.34	0.855229	0.0531468	16.0918	2.91158e-58	1.165e-56	10.6306	10.5636	10.6112	10.599	11.182	11.2408	11.226	11.243
ENSG00000285331.2 AC090517.5	174.771	2.27315	0.141262	16.0917	2.91817e-58	1.16579e-56	8.83439	8.88903	8.88608	8.8791	9.62531	9.55876	9.57596	9.62561
ENSG00000170689.10 HOXB9	2852.8	0.748795	0.0465658	16.0804	3.50331e-58	1.39734e-56	11.383	11.357	11.4706	11.3788	12.005	12.0098	12.0414	12.0263
ENSG00000166780.11 BMERB1	2361.2	-0.843776	0.052473	-16.0802	3.51273e-58	1.39889e-56	11.852	11.8047	11.8599	11.7493	11.1938	11.1263	11.0935	11.1333
ENSG00000085788.14 DDHD2	1767.19	-0.948578	0.0590118	-16.0744	3.85886e-58	1.53431e-56	11.4366	11.4539	11.5086	11.6008	10.7611	10.7812	10.7957	10.7741
ENSG00000080608.10 PUM3	1417.15	-0.909898	0.0566526	-16.061	4.78726e-58	1.90045e-56	11.2272	11.2227	11.3051	11.1959	10.5749	10.5384	10.6117	10.5731
ENSG00000140743.8 CDR2	1378.01	-1.10445	0.0687832	-16.0569	5.11363e-58	2.02683e-56	11.2689	11.2299	11.3513	11.1738	10.4274	10.4244	10.54	10.4521
ENSG00000249992.2 TMEM158	21404.5	0.862975	0.0537522	16.0547	5.29857e-58	2.09684e-56	13.9473	13.9476	14.0582	13.822	14.7776	14.8247	14.812	14.7212
ENSG00000176697.20 BDNF	225.273	1.87033	0.116617	16.0383	6.90131e-58	2.72683e-56	9.05274	9.02301	9.02186	9.06257	9.73945	9.71712	9.74164	9.72043
ENSG00000278709.2 NKILA	621.405	1.58705	0.0989814	16.0338	7.42058e-58	2.92742e-56	9.57066	9.63997	9.59822	9.74568	10.5978	10.5155	10.4107	10.5677
ENSG00000143878.10 RHOB	1877.1	0.903658	0.0563725	16.0301	7.87494e-58	3.10182e-56	10.8283	10.8768	10.9109	10.8358	11.5054	11.517	11.6287	11.5796
ENSG00000133872.14 SARAF	3782.33	-0.877915	0.0547816	-16.0257	8.45093e-58	3.32351e-56	12.3776	12.3588	12.4258	12.5184	11.5927	11.6512	11.7108	11.6859
ENSG00000149328.15 GLB1L2	520.325	1.63384	0.102018	16.0152	1.00044e-57	3.92833e-56	9.49739	9.5068	9.54292	9.50926	10.5135	10.3772	10.2615	10.3014
ENSG00000104549.12 SQLE	4897.16	-0.740698	0.0463015	-15.9973	1.33497e-57	5.23376e-56	12.6802	12.7202	12.7464	12.7083	11.985	12.0145	12.0939	12.1083
ENSG00000065882.16 TBC1D1	3068.49	-0.626388	0.0391594	-15.9959	1.36576e-57	5.34614e-56	12.0629	12.0665	12.0921	12.0661	11.55	11.5365	11.5393	11.5459
ENSG00000006282.21 SPATA20	1722.83	0.924402	0.0578329	15.984	1.65161e-57	6.45508e-56	10.7475	10.7733	10.7927	10.7401	11.5545	11.4341	11.4003	11.4661
ENSG00000174403.16 MIR1-1HG-AS1	304.2	2.34073	0.146632	15.9633	2.30338e-57	8.98851e-56	9.02713	9.17333	9.05692	8.94142	10.0438	10.0517	9.88489	9.99773
ENSG00000112414.15 ADGRG6	228.524	2.14739	0.134646	15.9484	2.92152e-57	1.13831e-55	8.96489	8.9682	8.92275	9.07779	9.82642	9.76025	9.75398	9.72398
ENSG00000280206.1 AC026401.3	274.629	-1.84621	0.115838	-15.9379	3.45838e-57	1.34541e-55	9.90459	9.82128	9.92494	9.81619	9.0847	9.19303	9.12512	9.10978
ENSG00000267121.6 AC008105.2	535.298	1.68727	0.106096	15.9032	6.01723e-57	2.33728e-55	9.55846	9.57002	9.54008	9.38049	10.4854	10.3891	10.4129	10.3091
ENSG00000177374.13 HIC1	976.496	1.03573	0.0652056	15.8841	8.16481e-57	3.16659e-55	10.1557	10.1488	10.2097	10.2301	10.8478	10.8495	10.9262	10.8345
ENSG00000280114.1 AL021920.2	129.334	3.22179	0.20295	15.8748	9.47612e-57	3.66952e-55	8.69759	8.65798	8.57736	8.63389	9.52827	9.50972	9.37732	9.44829
ENSG00000104635.15 SLC39A14	2934.22	-0.874788	0.0551125	-15.8728	9.78393e-57	3.78292e-55	12.0222	12.0707	12.1216	12.1683	11.3161	11.3363	11.3675	11.4358
ENSG00000174343.6 CHRNA9	197.49	-2.63421	0.166036	-15.8652	1.1028e-56	4.2574e-55	9.59662	9.69985	9.6508	9.84733	8.81299	8.89521	8.86881	8.79592
ENSG00000081791.9 DELE1	1449.61	0.906607	0.0571647	15.8596	1.20755e-56	4.65468e-55	10.5979	10.6268	10.6171	10.555	11.3141	11.2488	11.2017	11.2815
ENSG00000001630.17 CYP51A1	2570.19	-1.22587	0.0773054	-15.8575	1.24781e-56	4.80256e-55	11.9219	11.9716	12.0781	12.1402	10.9328	10.9504	11.135	11.1026
ENSG00000203727.4 SAMD5	791.519	-1.39807	0.0882008	-15.851	1.38444e-56	5.3203e-55	10.6649	10.7107	10.6699	10.8608	9.79458	9.86938	9.94053	9.89516
ENSG00000198355.5 PIM3	3364.76	-0.845791	0.0533808	-15.8445	1.53488e-56	5.88947e-55	12.3029	12.2127	12.342	12.1805	11.5642	11.4985	11.5616	11.5312
ENSG00000168734.14 PKIG	2192.43	-1.13467	0.0716159	-15.8438	1.55054e-56	5.94052e-55	11.8295	11.8235	11.8992	11.6781	10.8124	10.9216	10.8964	11.0083
ENSG00000276550.4 HERC2P2	2028.78	0.972694	0.0614487	15.8293	1.9523e-56	7.46844e-55	10.8983	11.0005	10.91	10.8239	11.7271	11.69	11.6111	11.6567
ENSG00000246695.8 RASSF8-AS1	366.333	1.5353	0.0970319	15.8226	2.17176e-56	8.2954e-55	9.30108	9.35625	9.39656	9.33439	10.068	10.0142	10.1	10.0172
ENSG00000221914.11 PPP2R2A	2363.88	-0.762182	0.0481721	-15.8221	2.19215e-56	8.36063e-55	11.7672	11.7991	11.8264	11.7854	11.1292	11.1486	11.2025	11.2225
ENSG00000185201.17 IFITM2	6964.54	1.02044	0.0645858	15.7998	3.11953e-56	1.18796e-54	12.4267	12.3535	12.3624	12.2061	13.3703	13.3286	13.1636	13.2352
ENSG00000248905.10 FMN1	354.091	1.8722	0.11851	15.7978	3.21996e-56	1.22436e-54	9.18768	9.20285	9.18302	9.36448	10.0263	10.0478	10.1173	10.0805
ENSG00000175395.16 ZNF25	297.236	-1.6796	0.10636	-15.7917	3.54904e-56	1.34746e-54	9.854	9.894	9.92494	9.95491	9.23215	9.17521	9.173	9.23467
ENSG00000025708.14 TYMP	2327.83	0.775442	0.0491491	15.7773	4.45588e-56	1.68922e-54	11.1469	11.1404	11.1965	11.1304	11.8116	11.803	11.7158	11.7855
ENSG00000166825.15 ANPEP	3660.97	0.807398	0.0512383	15.7577	6.08011e-56	2.30151e-54	11.6501	11.6595	11.6552	11.6737	12.4654	12.341	12.3116	12.3031
ENSG00000144677.15 CTDSPL	548.658	1.51444	0.0961483	15.751	6.75508e-56	2.55318e-54	9.56864	9.56563	9.49942	9.6922	10.4504	10.4317	10.3337	10.3691
ENSG00000180891.13 CUEDC1	1244.22	0.956163	0.0607344	15.7433	7.63004e-56	2.87957e-54	10.4305	10.4101	10.4526	10.4371	11.1528	11.0992	11.0259	11.1404
ENSG00000159873.10 CCDC117	1829.89	-1.21815	0.0774437	-15.7295	9.49086e-56	3.5765e-54	11.5175	11.6503	11.594	11.6888	10.5634	10.6222	10.7552	10.7818
ENSG00000145390.11 USP53	2398.51	-1.13165	0.0719997	-15.7175	1.14757e-55	4.318e-54	11.8353	11.905	11.8917	12.0382	10.8868	10.9872	11.0467	11.1026
ENSG00000196843.17 ARID5A	674.477	-1.31311	0.0835557	-15.7154	1.18659e-55	4.4582e-54	10.6516	10.5214	10.5596	10.478	9.80529	9.74522	9.7674	9.84833
ENSG00000119865.9 CNRIP1	959.201	1.03786	0.0660723	15.708	1.33354e-55	5.00287e-54	10.1348	10.1408	10.2288	10.1714	10.9087	10.8484	10.8037	10.8271
ENSG00000119280.17 C1orf198	1634.7	0.844667	0.0537937	15.702	1.46588e-55	5.49119e-54	10.7638	10.7219	10.6989	10.7981	11.4105	11.3839	11.3933	11.3391
ENSG00000169213.7 RAB3B	1452.8	-0.988367	0.0629528	-15.7001	1.50932e-55	5.64552e-54	11.2635	11.2657	11.2625	11.3556	10.5038	10.537	10.6447	10.5659
ENSG00000153066.13 TXNDC11	1465.71	-0.895223	0.0570274	-15.6981	1.5579e-55	5.81861e-54	11.2667	11.2949	11.3249	11.194	10.6348	10.6247	10.5893	10.6154
ENSG00000138639.18 ARHGAP24	704.854	-1.32938	0.0847064	-15.694	1.66212e-55	6.1987e-54	10.5752	10.5083	10.6778	10.6307	9.86756	9.84189	9.82878	9.73283
ENSG00000179598.6 PLD6	139.664	-2.52835	0.161259	-15.6788	2.11097e-55	7.86104e-54	9.43933	9.47607	9.52574	9.46897	8.73218	8.76143	8.76049	8.79592
ENSG00000136859.10 ANGPTL2	225.472	-2.07023	0.132058	-15.6767	2.18438e-55	8.12243e-54	9.68009	9.69401	9.76986	9.84733	8.99898	9.0049	9.01135	8.97722
ENSG00000198797.7 BRINP2	379.623	1.54066	0.098303	15.6726	2.32992e-55	8.65087e-54	9.29574	9.3287	9.40311	9.42447	10.0816	10.0614	10.0665	10.1117
ENSG00000154864.13 PIEZO2	163.131	2.47795	0.158318	15.6518	3.23069e-55	1.19777e-53	8.79269	8.78627	8.85376	8.82639	9.59222	9.64499	9.50577	9.52377
ENSG00000053747.17 LAMA3	2926.05	-1.01318	0.0647716	-15.6423	3.74944e-55	1.38806e-53	12.2194	12.1374	12.0123	12.1591	11.1894	11.3198	11.2851	11.3615
ENSG00000171617.15 ENC1	1615.37	0.883197	0.0564646	15.6416	3.7908e-55	1.40132e-53	10.6591	10.6994	10.711	10.7965	11.4092	11.3738	11.366	11.3656
ENSG00000065054.14 SLC9A3R2	1737.93	-0.850261	0.0544026	-15.6291	4.61603e-55	1.70388e-53	11.5059	11.4279	11.4763	11.4016	10.8402	10.7978	10.764	10.8271
ENSG00000164597.15 COG5	2281.57	-1.03724	0.0663817	-15.6253	4.89351e-55	1.80367e-53	11.7969	11.8188	11.8214	11.892	10.8776	10.9872	11.1125	11.0187
ENSG00000133606.11 MKRN1	2363.73	0.776587	0.0497129	15.6214	5.20183e-55	1.91452e-53	11.1228	11.158	11.253	11.1488	11.7867	11.796	11.8009	11.8067
ENSG00000183864.5 TOB2	3566.75	-0.707481	0.0452894	-15.6213	5.21097e-55	1.91509e-53	12.317	12.3236	12.2999	12.216	11.7089	11.6882	11.6653	11.6628
ENSG00000122133.17 PAEP	2215.05	1.50253	0.0962179	15.6159	5.67472e-55	2.08249e-53	10.7927	10.7364	10.7434	10.6669	11.6266	11.8887	12.0603	12.0301
ENSG00000136869.16 TLR4	129.204	3.01918	0.193389	15.6119	6.04e-55	2.21332e-53	8.69096	8.58991	8.66406	8.73646	9.47178	9.44489	9.40508	9.50651
ENSG00000177706.9 FAM20C	10191.7	0.661271	0.0423792	15.6037	6.8721e-55	2.51459e-53	13.037	13.0209	13.0461	13.0981	13.7331	13.7032	13.65	13.6126
ENSG00000112096.19 SOD2	6899.18	-1.00269	0.0642942	-15.5953	7.83402e-55	2.86242e-53	13.1977	13.2668	13.2467	13.3204	12.212	12.2523	12.4207	12.4498
ENSG00000176531.10 PHLDB3	905.969	-1.11895	0.0718243	-15.579	1.01165e-54	3.69106e-53	10.8609	10.7938	10.8402	10.7367	10.0934	10.0162	10.1441	10.0936
ENSG00000160691.19 SHC1	2252.14	0.954544	0.0613048	15.5705	1.15556e-54	4.21004e-53	11.082	11.0669	11.0294	10.9355	11.8674	11.8211	11.7245	11.7549
ENSG00000105855.10 ITGB8	160.998	2.50274	0.160789	15.5654	1.25105e-54	4.55135e-53	8.79808	8.85851	8.72731	8.83188	9.53376	9.50342	9.61146	9.59608
ENSG00000165006.14 UBAP1	2683.08	-0.845488	0.0543231	-15.5641	1.27735e-54	4.64036e-53	11.9773	11.9838	12.011	11.9247	11.3448	11.3213	11.1997	11.2491
ENSG00000138134.12 STAMBPL1	589.141	1.26476	0.0813039	15.5559	1.44991e-54	5.25968e-53	9.68918	9.68223	9.80392	9.68435	10.3854	10.4475	10.3853	10.4472
ENSG00000196155.13 PLEKHG4	1544.2	1.05827	0.06811	15.5376	1.93134e-54	6.99604e-53	10.6049	10.6505	10.5473	10.5657	11.4959	11.31	11.3117	11.3721
ENSG00000144827.9 ABHD10	1748.33	-0.830169	0.0534585	-15.5292	2.20013e-54	7.95828e-53	11.4011	11.4253	11.4981	11.4946	10.8562	10.7901	10.8287	10.8106
ENSG00000113083.15 LOX	9181.98	1.05101	0.0677036	15.5237	2.3988e-54	8.66451e-53	12.6808	12.5959	12.7355	12.7066	13.8073	13.7255	13.6045	13.5006
ENSG00000150753.12 CCT5	19631	-0.725598	0.0467972	-15.5052	3.20144e-54	1.15471e-52	14.6107	14.5753	14.7077	14.5553	13.8946	13.8607	13.9055	13.9755
ENSG00000108813.11 DLX4	649.095	1.20052	0.0774867	15.4933	3.85248e-54	1.38755e-52	9.81739	9.84375	9.81062	9.74007	10.5505	10.4882	10.4377	10.5051
ENSG00000154358.23 OBSCN	416.134	1.7815	0.115004	15.4908	4.00361e-54	1.43993e-52	9.32471	9.35896	9.23553	9.44201	10.1651	10.2103	10.2776	10.1078
ENSG00000168488.18 ATXN2L	10892.5	-0.747504	0.0483224	-15.4691	5.60868e-54	2.01434e-52	13.8401	13.8473	13.752	13.7513	13.1356	13.1093	13.1209	12.9933
ENSG00000115561.16 CHMP3	1851.29	0.830968	0.0537213	15.4681	5.69389e-54	2.04204e-52	10.8165	10.8683	10.925	10.9163	11.5545	11.4792	11.5406	11.5109
ENSG00000177108.5 ZDHHC22	291.887	1.6929	0.109492	15.4614	6.32448e-54	2.26497e-52	9.2027	9.13923	9.2237	9.19972	9.94006	9.88959	9.82993	9.92089
ENSG00000171298.13 GAA	4022.45	0.884257	0.0571939	15.4607	6.39204e-54	2.28592e-52	11.7461	11.7868	11.7074	11.6832	12.5759	12.5768	12.4258	12.427
ENSG00000107796.13 ACTA2	533.203	1.69328	0.109658	15.4414	8.6147e-54	3.07643e-52	9.51032	9.49037	9.51704	9.52081	10.5645	10.436	10.3044	10.268
ENSG00000161835.11 TAMALIN	427.736	-1.6157	0.104834	-15.412	1.35949e-53	4.84809e-52	10.141	10.1528	10.2843	10.187	9.40572	9.41429	9.47598	9.31768
ENSG00000100227.18 POLDIP3	3156.46	-0.935764	0.0607202	-15.4111	1.37914e-53	4.91123e-52	12.2087	12.2059	12.3055	12.0993	11.4654	11.4541	11.3371	11.4141
ENSG00000005483.21 KMT2E	3231.17	-0.664183	0.043138	-15.3967	1.72227e-53	6.12449e-52	12.1603	12.1505	12.1267	12.1625	11.5258	11.5904	11.6093	11.6117
ENSG00000050405.13 LIMA1	1689.87	-1.13765	0.0739395	-15.3862	2.02666e-53	7.19677e-52	11.454	11.4894	11.5882	11.4653	10.6314	10.5019	10.6944	10.7317
ENSG00000113763.12 UNC5A	274.203	1.65413	0.107538	15.3818	2.16984e-53	7.69439e-52	9.1662	9.20607	9.19543	9.12173	9.82642	9.87616	9.82533	9.84992
ENSG00000285006.1 AC005280.3	917.263	-1.14755	0.0746304	-15.3765	2.35395e-53	8.33557e-52	10.8843	10.7236	10.8609	10.8278	10.1134	10.1106	10.0224	10.1142
ENSG00000179604.10 CDC42EP4	3033.34	0.905371	0.0588811	15.3763	2.36213e-53	8.35282e-52	11.3821	11.4268	11.3437	11.3942	12.2547	12.1262	12.0396	12.1631
ENSG00000104312.8 RIPK2	2085.37	-0.91794	0.0597403	-15.3655	2.78873e-53	9.84754e-52	11.6671	11.6375	11.747	11.7067	10.9381	10.8726	11.0112	11.0277
ENSG00000164024.12 METAP1	3059.43	-0.65442	0.042593	-15.3645	2.83262e-53	9.98854e-52	12.0838	12.0668	12.1208	12.0385	11.5247	11.5203	11.5109	11.5459
ENSG00000164953.16 TMEM67	263.171	1.92389	0.125402	15.3418	4.02071e-53	1.41583e-51	9.03822	9.05863	9.05692	9.19972	9.83684	9.87841	9.82993	9.83712
ENSG00000178105.11 DDX10	1656.86	-0.959414	0.0625648	-15.3347	4.48232e-53	1.57618e-51	11.3933	11.4279	11.4857	11.4063	10.7327	10.6881	10.6228	10.7864
ENSG00000263528.8 IKBKE	288.102	2.01919	0.131678	15.3343	4.51231e-53	1.58452e-51	9.03085	9.09631	9.14462	9.15656	10.0263	9.84883	9.83794	9.96643
ENSG00000008710.20 PKD1	4252.74	-0.819502	0.0534472	-15.3329	4.6067e-53	1.61542e-51	12.6033	12.5961	12.4242	12.5855	11.8393	11.8663	11.8243	11.8122
ENSG00000109920.13 FNBP4	2252.75	-0.736727	0.048054	-15.3312	4.73051e-53	1.65653e-51	11.7702	11.7478	11.6973	11.6948	11.1168	11.1054	11.1617	11.1586
ENSG00000083223.18 TUT7	3437.07	-0.835101	0.0545002	-15.3229	5.37547e-53	1.87978e-51	12.2158	12.2603	12.2807	12.3778	11.5024	11.5589	11.6093	11.6054
ENSG00000138434.17 ITPRID2	5837.43	-0.932696	0.0608811	-15.3199	5.62645e-53	1.96482e-51	12.9366	12.9794	12.9979	13.1231	12.0527	12.1462	12.2435	12.2119
ENSG00000161036.13 LRWD1	1091.41	-0.941043	0.0614287	-15.3193	5.68483e-53	1.98247e-51	11.0042	10.9914	10.9371	10.9005	10.3393	10.3265	10.2855	10.3341
ENSG00000166037.11 CEP57	2193.51	-0.845892	0.0552242	-15.3174	5.85127e-53	2.0377e-51	11.7079	11.6808	11.8071	11.7202	11.0129	11.0249	11.1176	11.055
ENSG00000109171.15 SLAIN2	1727.74	-1.0054	0.06566	-15.3122	6.34135e-53	2.20532e-51	11.3992	11.5003	11.4725	11.5861	10.661	10.7011	10.7745	10.771
ENSG00000100626.17 GALNT16	187.414	2.36829	0.154745	15.3044	7.14219e-53	2.48041e-51	8.85414	8.86886	8.87336	8.9038	9.72809	9.66686	9.52263	9.67125
ENSG00000214140.11 PRCD	137.525	2.77078	0.181129	15.2973	7.96626e-53	2.76281e-51	8.6634	8.72312	8.73567	8.7682	9.4542	9.57658	9.44691	9.44367
ENSG00000177311.11 ZBTB38	1878.67	1.17971	0.0771355	15.294	8.39028e-53	2.90587e-51	10.6229	10.7356	10.6812	10.8716	11.5437	11.6113	11.6751	11.7031
ENSG00000175445.17 LPL	1111.07	-0.97775	0.063933	-15.2933	8.46845e-53	2.92892e-51	11.0222	10.955	10.988	10.9923	10.2843	10.2541	10.3809	10.3512
ENSG00000135821.19 GLUL	5152.33	0.645806	0.0422403	15.2889	9.07037e-53	3.13282e-51	12.1446	12.1781	12.2223	12.1241	12.7656	12.7213	12.7197	12.7804
ENSG00000142453.12 CARM1	3452.32	-0.78845	0.0515751	-15.2874	9.27658e-53	3.19966e-51	12.2913	12.2958	12.3212	12.1863	11.6233	11.6446	11.5384	11.5951
ENSG00000158292.7 GPR153	1000.35	1.13878	0.0745053	15.2845	9.70084e-53	3.34143e-51	10.2013	10.2299	10.0976	10.1262	10.8646	10.8558	10.995	10.9389
ENSG00000138867.17 GUCD1	1767.95	-0.82258	0.0538478	-15.276	1.10467e-52	3.79982e-51	11.4333	11.4924	11.5227	11.411	10.8702	10.8463	10.8085	10.8248
ENSG00000137871.21 ZNF280D	684.21	1.59118	0.104181	15.2732	1.15439e-52	3.96544e-51	9.60252	9.69985	9.68116	9.82666	10.5135	10.5738	10.7277	10.6454
ENSG00000064999.15 ANKS1A	1969.49	-0.730258	0.0478272	-15.2687	1.23666e-52	4.24229e-51	11.5628	11.5766	11.5257	11.5902	10.9994	11.0323	10.9762	10.97
ENSG00000164713.10 BRI3	1199.34	-1.11018	0.0727166	-15.2672	1.26469e-52	4.33256e-51	11.0673	11.0979	11.2231	11.0161	10.3365	10.3343	10.28	10.3847
ENSG00000240764.4 PCDHGC5	112.089	-3.50966	0.229901	-15.266	1.28879e-52	4.40912e-51	9.47101	9.29161	9.3699	9.43703	8.56942	8.64762	8.60411	8.51862
ENSG00000100304.13 TTLL12	2934.88	-0.815937	0.0534768	-15.2578	1.46157e-52	4.99345e-51	12.0871	12.1041	12.0665	12.0505	11.441	11.4486	11.2942	11.4009
ENSG00000085982.14 USP40	620.264	1.12432	0.0737136	15.2526	1.58222e-52	5.39836e-51	9.79123	9.76403	9.82828	9.80739	10.4916	10.4346	10.4229	10.4001
ENSG00000143333.7 RGS16	1159.41	1.45443	0.0953686	15.2506	1.63175e-52	5.55984e-51	10.1348	10.1712	10.2241	10.1043	10.9557	11.0806	11.1916	11.3143
ENSG00000114999.8 TTL	2662.55	-0.642574	0.0421575	-15.2422	1.85455e-52	6.31048e-51	11.8726	11.8961	11.9127	11.9232	11.367	11.3482	11.3806	11.3816
ENSG00000197467.16 COL13A1	3537.8	1.21607	0.0797968	15.2396	1.93139e-52	6.5631e-51	11.4233	11.3168	11.3866	11.4567	12.6411	12.4361	12.2888	12.3436
ENSG00000140553.18 UNC45A	2834.75	-0.831676	0.054602	-15.2316	2.18194e-52	7.40454e-51	12.0645	12.0919	12.0405	11.9563	11.4236	11.3348	11.2964	11.3371
ENSG00000078295.17 ADCY2	104.256	-3.47974	0.228457	-15.2315	2.18492e-52	7.40467e-51	9.38738	9.38565	9.31062	9.33717	8.4876	8.63664	8.62154	8.52936
ENSG00000084112.15 SSH1	3219.41	0.825376	0.0542325	15.2192	2.63669e-52	8.92376e-51	11.4614	11.547	11.4386	11.5444	12.1169	12.2043	12.2636	12.203
ENSG00000138829.12 FBN2	2580.27	0.881461	0.0579334	15.2151	2.80962e-52	9.4963e-51	11.2244	11.158	11.148	11.3265	11.9364	11.9362	11.9706	11.9088
ENSG00000197448.14 GSTK1	752.851	1.20285	0.0790973	15.2073	3.16523e-52	1.06839e-50	9.87572	9.86915	9.97047	9.9313	10.713	10.6701	10.5569	10.6119
ENSG00000272196.2 H2AC19	1197.88	-1.91742	0.12611	-15.2044	3.30671e-52	1.11466e-50	11.2609	11.3423	11.2749	11.1669	10.0543	10.1326	9.71274	10.0172
ENSG00000170325.16 PRDM10	846.205	-1.05362	0.0693159	-15.2002	3.52442e-52	1.18646e-50	10.6666	10.7046	10.7143	10.8005	10.056	10.0975	10.0311	10.058
ENSG00000176788.9 BASP1	11580.2	0.890729	0.0586475	15.1878	4.25743e-52	1.43131e-50	13.0647	13.04	13.158	13.0854	14.0646	13.9686	13.8342	13.8533
ENSG00000158186.13 MRAS	486.797	1.39789	0.0920685	15.1832	4.57106e-52	1.53471e-50	9.47101	9.51376	9.58467	9.61939	10.3015	10.2607	10.2222	10.2904
ENSG00000164400.6 CSF2	234.353	2.11034	0.138993	15.1831	4.57755e-52	1.53485e-50	8.99671	9.03508	8.94607	9.03516	9.74171	9.69887	9.76376	9.90734
ENSG00000228705.2 LINC00659	146.49	-2.71887	0.179181	-15.1739	5.26723e-52	1.76375e-50	9.55231	9.488	9.59822	9.4143	8.72414	8.80194	8.70348	8.76795
ENSG00000138674.17 SEC31A	5729.16	-0.577554	0.0380895	-15.163	6.21203e-52	2.07737e-50	12.9063	12.8626	12.8657	12.8166	12.3308	12.3443	12.3502	12.3314
ENSG00000011028.14 MRC2	17042	0.914076	0.060348	15.1467	7.96216e-52	2.65911e-50	13.6016	13.6181	13.5737	13.6028	14.6159	14.5514	14.3536	14.3862
ENSG00000188157.15 AGRN	19934.7	0.757663	0.0500794	15.1292	1.03899e-51	3.46532e-50	13.9531	13.949	13.8118	13.928	14.7017	14.7026	14.6102	14.5681
ENSG00000152795.18 HNRNPDL	6834.62	-0.622147	0.0411263	-15.1277	1.06327e-51	3.54161e-50	13.1203	13.082	13.1746	13.086	12.4962	12.5592	12.5717	12.5442
ENSG00000146918.20 NCAPG2	718.039	1.2932	0.085502	15.1248	1.11083e-51	3.69515e-50	9.78126	9.809	9.84998	9.9313	10.7089	10.6059	10.562	10.5623
ENSG00000126602.11 TRAP1	4481.78	-0.720178	0.0476474	-15.1147	1.29464e-51	4.30094e-50	12.6212	12.5826	12.6312	12.5206	11.9859	11.9575	11.8868	11.9817
ENSG00000169744.13 LDB2	568.2	1.22993	0.0813825	15.113	1.32921e-51	4.40996e-50	9.61422	9.74179	9.70827	9.74007	10.3921	10.3605	10.3639	10.3929
ENSG00000167721.11 TSR1	4085.71	-0.608942	0.0403204	-15.1026	1.55673e-51	5.15806e-50	12.48	12.4045	12.4307	12.4051	11.9038	11.9112	11.8821	11.8929
ENSG00000103326.12 CAPN15	2182.77	-0.910868	0.0603358	-15.0966	1.70381e-51	5.63798e-50	11.8463	11.7795	11.6602	11.6724	11.0079	11.0212	11.0121	11.0328
ENSG00000175264.8 CHST1	565.046	1.20505	0.0798267	15.0958	1.72577e-51	5.70317e-50	9.66723	9.75296	9.69849	9.70194	10.3212	10.4331	10.3428	10.3733
ENSG00000155189.12 AGPAT5	1121.68	-1.24138	0.0822853	-15.0862	1.99498e-51	6.58422e-50	10.9703	11.0642	11.0014	11.1995	10.1539	10.1826	10.2934	10.2382
ENSG00000124920.14 MYRF	2413.87	0.730048	0.0484707	15.0616	2.89562e-51	9.54421e-50	11.2512	11.2257	11.148	11.2343	11.8073	11.8509	11.7943	11.7862
ENSG00000176170.14 SPHK1	2645.3	-0.885551	0.0588762	-15.0409	3.96137e-51	1.304e-49	11.9795	11.9925	12.0435	11.8566	11.2394	11.2886	11.1802	11.261
ENSG00000167460.17 TPM4	16662.7	-0.556379	0.0370414	-15.0205	5.39215e-51	1.77267e-49	14.329	14.2809	14.3656	14.2985	13.7611	13.7467	13.8069	13.8104
ENSG00000155846.17 PPARGC1B	743.201	-1.12933	0.0751899	-15.0197	5.45836e-51	1.7921e-49	10.6075	10.6396	10.5224	10.6705	9.87762	9.95665	9.95817	9.92388
ENSG00000128342.5 LIF	3335.54	0.871482	0.058042	15.0147	5.88332e-51	1.92912e-49	11.5318	11.511	11.5469	11.4703	12.3377	12.3161	12.1416	12.2282
ENSG00000170537.13 TMC7	223.895	-1.89392	0.126151	-15.0132	6.01938e-51	1.97117e-49	9.65795	9.72672	9.81727	9.70581	9.00902	9.03249	9.03817	9.04648
ENSG00000090530.10 P3H2	479.426	1.26239	0.0841663	14.9987	7.4865e-51	2.44843e-49	9.59068	9.5744	9.61956	9.5345	10.2814	10.2425	10.1842	10.2219
ENSG00000164651.17 SP8	336.847	-1.78757	0.119278	-14.9866	8.98083e-51	2.93335e-49	9.90908	10.0677	9.98783	10.1001	9.14941	9.2889	9.26919	9.22592
ENSG00000127399.15 LRRC61	1208.03	1.17582	0.0785186	14.975	1.06968e-50	3.4893e-49	10.2999	10.3816	10.339	10.2226	11.2251	11.1426	11.0066	11.1255
ENSG00000140575.13 IQGAP1	6689.33	-0.695165	0.0464447	-14.9676	1.19586e-50	3.89589e-49	13.0476	13.0681	13.1547	13.1802	12.4723	12.4368	12.5132	12.4756
ENSG00000224189.8 HAGLR	155.1	2.33599	0.156081	14.9665	1.21505e-50	3.9533e-49	8.79269	8.83182	8.83348	8.83732	9.58183	9.57067	9.48706	9.46657
ENSG00000166783.22 MARF1	2274.48	-0.81175	0.054254	-14.962	1.30029e-50	4.2252e-49	11.7427	11.8023	11.6772	11.8234	11.0759	11.0983	11.1413	11.1261
ENSG00000100292.18 HMOX1	286.49	-1.56939	0.104942	-14.9548	1.44902e-50	4.70243e-49	9.82223	9.83688	9.90254	9.89908	9.19768	9.25263	9.19916	9.20816
ENSG00000168243.11 GNG4	1503.97	0.88448	0.0592286	14.9333	2.00095e-50	6.48523e-49	10.6365	10.6369	10.638	10.666	11.3415	11.3607	11.2173	11.2692
ENSG00000079257.8 LXN	487.307	-9.69681	0.649355	-14.933	2.01062e-50	6.50822e-49	10.5663	10.5799	10.5814	10.5345	8.23316	8.32855	8.32762	8.34528
ENSG00000141337.13 ARSG	359.261	1.64129	0.110067	14.9117	2.76636e-50	8.94303e-49	9.24622	9.36705	9.38996	9.21892	10.0612	10.0517	10.0504	10.0351
ENSG00000100296.14 THOC5	1814.21	-0.881735	0.0591321	-14.9113	2.78446e-50	8.99004e-49	11.5215	11.5037	11.5876	11.4333	10.8877	10.8632	10.7983	10.7986
ENSG00000121316.11 PLBD1	815.4	0.991125	0.0664724	14.9103	2.82403e-50	9.10614e-49	10.0393	10.0288	10.1046	10.0421	10.6814	10.6408	10.6447	10.7165
ENSG00000164111.15 ANXA5	10609.3	-0.682885	0.0458331	-14.8994	3.32658e-50	1.07129e-48	13.7798	13.6727	13.8195	13.6773	13.0994	13.0769	13.0812	13.1126
ENSG00000147394.18 ZNF185	171.066	-2.16428	0.145474	-14.8774	4.6189e-50	1.48558e-48	9.59662	9.55012	9.64048	9.50926	8.92424	8.84686	8.86881	8.89554
ENSG00000125398.8 SOX9	6043.95	0.941347	0.0632752	14.877	4.64741e-50	1.49285e-48	12.1927	12.1415	12.1179	12.3551	13.1165	13.0756	13.0739	12.9708
ENSG00000110092.4 CCND1	18776.4	0.7522	0.0505679	14.875	4.78727e-50	1.53582e-48	13.7717	13.7796	13.8015	13.967	14.5463	14.568	14.5849	14.542
ENSG00000124571.18 XPO5	3552.19	-0.577631	0.0388329	-14.8748	4.80377e-50	1.53916e-48	12.2443	12.2088	12.2652	12.2406	11.7451	11.7462	11.7328	11.7449
ENSG00000104059.4 FAM189A1	1541.69	0.837678	0.0563593	14.8632	5.71373e-50	1.82839e-48	10.7072	10.6862	10.6541	10.7135	11.3121	11.3577	11.3419	11.237
ENSG00000082781.12 ITGB5	14367.9	0.680389	0.0457959	14.857	6.26677e-50	2.00283e-48	13.5028	13.4964	13.5546	13.4691	14.2389	14.1768	14.0731	14.142
ENSG00000184500.16 PROS1	679.374	1.17706	0.0793297	14.8376	8.37361e-50	2.67278e-48	9.79783	9.79301	9.84135	9.94238	10.5458	10.5556	10.5043	10.5312
ENSG00000126522.17 ASL	911.289	1.24576	0.0839762	14.8347	8.73926e-50	2.78597e-48	10.0619	9.98703	10.1491	9.97653	10.9337	10.8674	10.7772	10.7795
ENSG00000196187.12 TMEM63A	1684.71	1.11578	0.0752174	14.8341	8.8179e-50	2.8075e-48	10.7048	10.7124	10.5754	10.6047	11.5905	11.5538	11.3781	11.4296
ENSG00000168032.10 ENTPD3	175.149	-2.56958	0.173441	-14.8153	1.16607e-49	3.70792e-48	9.56254	9.54788	9.69109	9.67046	8.8712	8.70807	8.78474	8.89094
ENSG00000108846.16 ABCC3	262.412	2.12145	0.143209	14.8136	1.1958e-49	3.79766e-48	9.00444	9.07013	9.12248	8.98132	9.9533	9.9397	9.78306	9.76239
ENSG00000167977.9 KCTD5	1491.68	-0.934171	0.063073	-14.811	1.24464e-49	3.94783e-48	11.2699	11.2755	11.398	11.2578	10.5784	10.6905	10.5999	10.5926
ENSG00000144369.13 FAM171B	244.558	-1.76984	0.119705	-14.7851	1.82893e-49	5.79385e-48	9.7353	9.76586	9.75361	9.85244	9.07109	9.05383	9.13678	9.1064
ENSG00000118503.15 TNFAIP3	1433.67	-0.844601	0.0571385	-14.7816	1.92405e-49	6.08752e-48	11.2162	11.2564	11.2786	11.1793	10.5944	10.5803	10.6142	10.6698
ENSG00000128591.16 FLNC	3483.68	-0.705496	0.0477797	-14.7656	2.44132e-49	7.71445e-48	12.2732	12.2661	12.2445	12.2502	11.7251	11.6807	11.6248	11.5848
ENSG00000137478.15 FCHSD2	784.225	-0.987197	0.0669022	-14.7558	2.82268e-49	8.90836e-48	10.6152	10.5846	10.6845	10.6444	9.9976	10.0478	10.035	10.0103
ENSG00000103034.14 NDRG4	527.126	1.13114	0.0766595	14.7554	2.83878e-49	8.94802e-48	9.65422	9.67231	9.72279	9.68435	10.2829	10.3076	10.2639	10.3102
ENSG00000181019.13 NQO1	709.273	1.09533	0.0742735	14.7473	3.20171e-49	1.00794e-47	9.86956	9.86243	9.92696	9.96422	10.617	10.5317	10.5263	10.5568
ENSG00000100739.11 BDKRB1	123.219	-2.74868	0.186413	-14.7451	3.30727e-49	1.03988e-47	9.36032	9.4394	9.46324	9.41174	8.60352	8.70807	8.73502	8.726
ENSG00000042493.16 CAPG	4923.28	-1.01473	0.0688485	-14.7386	3.64451e-49	1.14448e-47	12.8352	12.7852	12.9405	12.66	12.0145	11.8972	11.8356	11.8723
ENSG00000134802.18 SLC43A3	3585.23	0.958839	0.0650997	14.7288	4.21228e-49	1.32114e-47	11.5493	11.5389	11.6095	11.5161	12.5047	12.4171	12.2386	12.3353
ENSG00000178860.9 MSC	685.037	-1.21435	0.0824495	-14.7284	4.23869e-49	1.32777e-47	10.6083	10.5655	10.5522	10.4624	9.90925	9.85113	9.77224	9.82744
ENSG00000101290.14 CDS2	1473.81	0.760859	0.0516636	14.7272	4.3129e-49	1.34934e-47	10.6862	10.6604	10.6688	10.7014	11.2731	11.2527	11.2323	11.2012
ENSG00000122741.16 DCAF10	2226.76	-1.07703	0.0731364	-14.7263	4.36978e-49	1.36545e-47	11.7743	11.8278	11.736	11.9108	10.8259	10.9395	11.0663	10.9814
ENSG00000236453.5 AC003092.1	328.038	-1.70511	0.115896	-14.7124	5.36545e-49	1.6745e-47	9.9195	9.9594	9.94098	10.1207	9.23215	9.20181	9.27315	9.2604
ENSG00000168918.14 INPP5D	150.381	2.22365	0.151186	14.7081	5.7224e-49	1.78369e-47	8.87325	8.83726	8.83348	8.78633	9.51165	9.5253	9.46799	9.49996
ENSG00000230487.8 PSMG3-AS1	139.768	2.31773	0.157633	14.7033	6.13519e-49	1.91e-47	8.79808	8.74935	8.83348	8.80958	9.48333	9.48429	9.44034	9.44829
ENSG00000099250.18 NRP1	9181.6	0.603004	0.0410508	14.6892	7.55549e-49	2.34927e-47	12.9344	12.9067	12.974	12.9597	13.5751	13.5203	13.4753	13.4678
ENSG00000106003.13 LFNG	132.997	2.66207	0.181293	14.6838	8.18115e-49	2.54069e-47	8.75913	8.69534	8.68307	8.77432	9.38055	9.52838	9.42538	9.48895
ENSG00000086065.14 CHMP5	2598.23	-0.714857	0.0487296	-14.6699	1.0053e-48	3.11817e-47	11.8565	11.8722	11.9645	11.8852	11.2779	11.2986	11.347	11.2985
ENSG00000162407.9 PLPP3	1069.55	0.941893	0.0642221	14.6662	1.0614e-48	3.28813e-47	10.22	10.3237	10.3347	10.3274	10.9799	10.9216	10.9059	10.9444
ENSG00000179348.12 GATA2	2438.16	0.708445	0.0483186	14.662	1.12947e-48	3.4947e-47	11.2485	11.292	11.2141	11.194	11.7843	11.8555	11.8003	11.8181
ENSG00000170876.8 TMEM43	2733.02	-0.662533	0.045199	-14.6581	1.19515e-48	3.69003e-47	11.8992	11.9197	11.9627	11.9747	11.4117	11.4152	11.3689	11.3671
ENSG00000102172.16 SMS	2112.39	-0.866796	0.0591342	-14.6581	1.19552e-48	3.69003e-47	11.7013	11.6205	11.792	11.6382	11.0312	10.9862	10.9644	11.0335
ENSG00000105429.13 MEGF8	1757.94	1.32144	0.0901873	14.6522	1.30458e-48	4.02175e-47	10.5247	10.5856	10.4802	10.7719	11.6501	11.6818	11.5478	11.4741
ENSG00000154803.13 FLCN	810.505	-1.0398	0.0709775	-14.6497	1.35233e-48	4.16386e-47	10.7342	10.6765	10.6722	10.6205	10.0368	10.0142	9.98466	10.0858
ENSG00000127920.6 GNG11	1275.34	-1.04484	0.071335	-14.647	1.40799e-48	4.32995e-47	11.0605	11.1212	11.1803	11.2537	10.3881	10.362	10.4342	10.4793
ENSG00000078668.14 VDAC3	1390.51	-0.820285	0.0560219	-14.6422	1.51094e-48	4.6409e-47	11.1717	11.2059	11.2456	11.1393	10.6248	10.5944	10.5646	10.6049
ENSG00000077380.16 DYNC1I2	5303.03	-0.574213	0.0392261	-14.6385	1.59477e-48	4.89244e-47	12.7273	12.7326	12.8074	12.7693	12.2354	12.2362	12.2274	12.2683
ENSG00000214866.9 DCDC2C	89.0967	-3.50355	0.239468	-14.6305	1.79349e-48	5.49538e-47	9.22907	9.29161	9.30338	9.2711	8.56942	8.51893	8.5082	8.59561
ENSG00000163513.19 TGFBR2	5836.73	0.682785	0.046705	14.6191	2.12182e-48	6.49354e-47	12.273	12.2888	12.2543	12.404	12.9063	12.9233	12.9522	12.9222
ENSG00000255750.6 AC022509.1	87.1004	-5.0918	0.348396	-14.615	2.2546e-48	6.89156e-47	9.27407	9.27693	9.27761	9.33161	8.41319	8.46661	8.39672	8.41037
ENSG00000135083.16 CCNJL	653.569	1.12541	0.077008	14.6142	2.2795e-48	6.95922e-47	9.76276	9.85227	9.8818	9.84219	10.5026	10.506	10.4286	10.5079
ENSG00000132361.18 CLUH	4842.71	-0.640713	0.0438508	-14.6112	2.38279e-48	7.26577e-47	12.7018	12.7026	12.5969	12.6493	12.1275	12.0991	12.0808	12.0622
ENSG00000065548.18 ZC3H15	2395.25	-0.857619	0.0587377	-14.6008	2.77522e-48	8.45221e-47	11.8202	11.8498	11.816	11.8747	11.1028	11.0644	11.2495	11.151
ENSG00000125633.11 CCDC93	1378.07	-0.770257	0.0527784	-14.5942	3.05954e-48	9.30691e-47	11.1916	11.1429	11.1756	11.1607	10.5645	10.6147	10.6222	10.6335
ENSG00000185640.6 KRT79	929.967	1.17134	0.0803122	14.5848	3.50732e-48	1.06562e-46	10.1569	10.1515	10.0657	9.97653	10.8572	10.8819	10.7734	10.8716
ENSG00000087111.21 PIGS	996.615	1.02615	0.0705441	14.5463	6.16653e-48	1.8713e-46	10.1763	10.1907	10.246	10.2087	10.9522	10.9206	10.7843	10.8781
ENSG00000020256.20 ZFP64	3226.88	-0.772905	0.0531778	-14.5343	7.34093e-48	2.22502e-46	12.2365	12.1827	12.2148	12.0983	11.4977	11.5352	11.4835	11.5947
ENSG00000086730.17 LAT2	226.216	1.68761	0.116133	14.5317	7.62789e-48	2.30922e-46	9.08443	9.09631	9.08098	9.06257	9.72809	9.7197	9.66726	9.73635
ENSG00000107130.10 NCS1	1578.14	-0.809964	0.0557429	-14.5304	7.78066e-48	2.35265e-46	11.3258	11.3202	11.3305	11.3458	10.8085	10.6905	10.6792	10.7294
ENSG00000135926.15 TMBIM1	2687.31	-0.902945	0.0621656	-14.5248	8.43432e-48	2.54725e-46	12.0331	11.9744	12.0703	11.8938	11.3342	11.2448	11.172	11.2518
ENSG00000176953.12 NFATC2IP	2279.02	-0.734299	0.0505868	-14.5156	9.64883e-48	2.91056e-46	11.7446	11.7556	11.7666	11.6982	11.182	11.0734	11.1855	11.1534
ENSG00000122861.16 PLAU	21899.6	0.641896	0.0442636	14.5017	1.18231e-47	3.56216e-46	14.0555	14.0582	14.2063	14.1223	14.7009	14.7343	14.7564	14.7517
ENSG00000117868.17 ESYT2	3442.7	0.715961	0.049404	14.492	1.36212e-47	4.09902e-46	11.5877	11.6258	11.6396	11.685	12.2181	12.2339	12.3246	12.2094
ENSG00000173153.17 ESRRA	1640.76	-0.83788	0.0578505	-14.4835	1.53951e-47	4.62731e-46	11.3865	11.3357	11.4496	11.3594	10.7368	10.7834	10.6961	10.7986
ENSG00000168887.11 C2orf68	711.169	1.1048	0.0762843	14.4827	1.55844e-47	4.67866e-46	9.94297	9.93589	9.89842	9.83876	10.6337	10.506	10.5407	10.5695
ENSG00000168936.11 TMEM129	1010.67	0.916462	0.0633443	14.4679	1.93161e-47	5.79206e-46	10.2734	10.2399	10.2768	10.2549	10.8841	10.9024	10.7967	10.9064
ENSG00000103647.13 CORO2B	2646.17	0.739021	0.0511152	14.4579	2.23377e-47	6.69018e-46	11.2784	11.3602	11.2858	11.3348	11.9643	11.9585	11.9258	11.8492
ENSG00000132463.14 GRSF1	3190.48	-0.718935	0.0497398	-14.4539	2.36787e-47	7.08342e-46	12.1348	12.1112	12.2099	12.1542	11.493	11.4979	11.5929	11.5779
ENSG00000197822.12 OCLN	734.403	1.13362	0.0784375	14.4525	2.41874e-47	7.22702e-46	9.92393	9.894	9.83918	10.0097	10.5841	10.6096	10.6447	10.5632
ENSG00000095319.14 NUP188	2836.57	-0.622907	0.0431069	-14.4503	2.49678e-47	7.45139e-46	11.9492	12.007	11.9582	11.9733	11.4852	11.4636	11.4347	11.4296
ENSG00000215252.11 GOLGA8B	2258.97	0.810389	0.0561143	14.4418	2.82529e-47	8.42184e-46	11.1222	11.1883	11.0084	11.0877	11.7658	11.7656	11.7236	11.7613
ENSG00000121064.13 SCPEP1	342.69	1.58732	0.109927	14.4398	2.90676e-47	8.65446e-46	9.24339	9.27693	9.36312	9.30042	10.0508	10.0729	9.92156	9.97075
ENSG00000159921.20 GNE	1348.9	-0.756973	0.052433	-14.437	3.02871e-47	9.00693e-46	11.1151	11.1334	11.1449	11.1688	10.5887	10.5634	10.6148	10.6058
ENSG00000100814.18 CCNB1IP1	3849.6	-0.874487	0.060583	-14.4345	3.13717e-47	9.31851e-46	12.5066	12.4177	12.5272	12.31	11.6591	11.6707	11.6569	11.7487
ENSG00000069399.15 BCL3	4260.98	0.689128	0.0477492	14.4322	3.24419e-47	9.62508e-46	11.9121	11.8756	11.9676	11.8698	12.5569	12.5573	12.4652	12.4715
ENSG00000109472.14 CPE	1196.16	0.993838	0.0689448	14.415	4.16551e-47	1.2344e-45	10.3204	10.3353	10.4828	10.3829	11.1307	11.0607	11.02	11.0713
ENSG00000163975.12 MELTF	1796.31	0.887632	0.0615797	14.4144	4.20325e-47	1.24412e-45	10.8609	10.8598	10.774	10.7916	11.581	11.5455	11.432	11.4525
ENSG00000137073.23 UBAP2	1893.93	-0.716019	0.0496908	-14.4095	4.51028e-47	1.33344e-45	11.5018	11.548	11.4788	11.5263	10.9901	10.9708	10.9639	10.9099
ENSG00000154359.13 LONRF1	1106.16	-1.01527	0.0704714	-14.4069	4.68288e-47	1.38285e-45	10.9643	10.9056	11.0737	11.0251	10.2492	10.3044	10.3594	10.2848
ENSG00000171004.18 HS6ST2	130.827	2.37321	0.16479	14.4014	5.07173e-47	1.49592e-45	8.74148	8.73641	8.79797	8.80958	9.39322	9.44824	9.43039	9.44599
ENSG00000159445.13 THEM4	465.047	1.3123	0.0912184	14.3863	6.30772e-47	1.85831e-45	9.49521	9.49273	9.61427	9.58539	10.1855	10.1896	10.2105	10.2691
ENSG00000231881.2 AL109615.2	194.964	2.05522	0.142876	14.3846	6.46052e-47	1.90111e-45	9.00827	8.87903	8.90468	8.98988	9.58444	9.66686	9.65659	9.69155
ENSG00000181577.16 C6orf223	133.346	2.68162	0.186483	14.3799	6.91569e-47	2.03268e-45	8.74743	8.75569	8.67367	8.72986	9.33482	9.5253	9.45507	9.51301
ENSG00000196352.16 CD55	7382.37	-0.695073	0.0484084	-14.3585	9.41916e-47	2.76529e-45	13.2342	13.1963	13.2959	13.2599	12.5036	12.607	12.6522	12.6455
ENSG00000037280.16 FLT4	617.776	1.07878	0.0751794	14.3494	1.07493e-46	3.15214e-45	9.79947	9.80369	9.80839	9.82492	10.473	10.4659	10.3765	10.3836
ENSG00000112511.18 PHF1	1671.23	-0.887524	0.0618709	-14.3448	1.1486e-46	3.36424e-45	11.4886	11.4361	11.4393	11.3053	10.7721	10.7611	10.7574	10.7093
ENSG00000131435.13 PDLIM4	7662.74	0.78993	0.0551395	14.326	1.50495e-46	4.40291e-45	12.6544	12.5748	12.6726	12.4854	13.4061	13.3392	13.2853	13.289
ENSG00000110841.14 PPFIBP1	8252.83	-0.603082	0.0421071	-14.3226	1.58133e-46	4.62101e-45	13.3332	13.3368	13.3438	13.442	12.7707	12.7855	12.8338	12.8161
ENSG00000164916.11 FOXK1	6141.4	-0.838821	0.0585922	-14.3163	1.73188e-46	5.05508e-45	13.115	13.0875	12.9046	13.0748	12.2778	12.3362	12.3176	12.2036
ENSG00000187514.17 PTMA	37508.6	-0.654883	0.0457643	-14.3099	1.89768e-46	5.53265e-45	15.531	15.4256	15.5617	15.4955	14.8549	14.7865	14.8657	14.9289
ENSG00000132470.14 ITGB4	1014.64	1.39538	0.0976204	14.2939	2.38751e-46	6.9527e-45	10.0379	10.0244	10.115	10.107	11.1746	11.0212	10.8803	10.8418
ENSG00000092068.20 SLC7A8	2281.57	1.00082	0.07004	14.2893	2.55051e-46	7.41881e-45	10.965	11.0392	11.0585	11.0189	11.9442	11.8673	11.6774	11.7851
ENSG00000185112.6 FAM43A	1994.54	0.844692	0.0591274	14.286	2.67697e-46	7.77768e-45	10.9663	10.9513	10.9673	10.9245	11.7104	11.644	11.5377	11.5609
ENSG00000085662.14 AKR1B1	3777.08	0.823775	0.0576911	14.2791	2.95471e-46	8.57478e-45	11.6623	11.6804	11.748	11.6615	12.4666	12.4515	12.2715	12.4111
ENSG00000183208.12 GDPGP1	413.496	-1.32478	0.0928212	-14.2724	3.25365e-46	9.43147e-45	10.1727	10.13	10.1338	10.0363	9.47757	9.42117	9.49646	9.48451
ENSG00000006704.11 GTF2IRD1	1239.78	-0.837839	0.0587515	-14.2607	3.84365e-46	1.11289e-44	11.108	11.0535	11.0912	11.023	10.5327	10.4645	10.4406	10.4832
ENSG00000101670.12 LIPG	1661	-0.88442	0.0620243	-14.2593	3.92621e-46	1.1355e-44	11.3197	11.4392	11.4197	11.4587	10.7741	10.7757	10.668	10.7648
ENSG00000170632.14 ARMC10	1440.34	-1.15745	0.0811781	-14.2582	3.98811e-46	1.15208e-44	11.2376	11.3067	11.3575	11.3772	10.3558	10.4403	10.6123	10.4956
ENSG00000046653.15 GPM6B	144.473	-2.46337	0.172879	-14.2491	4.54263e-46	1.31077e-44	9.4462	9.44437	9.48751	9.59613	8.74008	8.74429	8.83379	8.79044
ENSG00000124104.19 SNX21	3191.55	0.805306	0.0565678	14.2361	5.46792e-46	1.57416e-44	11.4684	11.469	11.5366	11.519	12.2975	12.1604	12.1542	12.1032
ENSG00000105088.8 OLFM2	1545.49	-0.927342	0.0651401	-14.2361	5.46777e-46	1.57416e-44	11.3958	11.339	11.3656	11.2525	10.7316	10.6785	10.5968	10.6093
ENSG00000100100.13 PIK3IP1	401.432	-1.56433	0.109926	-14.2308	5.90445e-46	1.6979e-44	10.1335	10.1996	10.1167	10.0594	9.46303	9.42459	9.28683	9.38152
ENSG00000164283.13 ESM1	11933.7	-1.01615	0.0714477	-14.2223	6.65812e-46	1.91245e-44	13.9086	13.9026	14.0059	14.2235	13.0733	12.9591	13.0776	13.09
ENSG00000156675.16 RAB11FIP1	573.162	-1.16207	0.0817266	-14.219	6.9889e-46	2.00518e-44	10.3689	10.3671	10.3831	10.3807	9.712	9.64774	9.80439	9.73459
ENSG00000124762.14 CDKN1A	7062.25	-0.704331	0.0495517	-14.2141	7.49573e-46	2.14815e-44	13.2017	13.1685	13.2888	13.0942	12.5695	12.5367	12.5398	12.5159
ENSG00000129245.12 FXR2	3666.81	-0.738196	0.0519655	-14.2055	8.46956e-46	2.42448e-44	12.3997	12.3075	12.3842	12.2465	11.7412	11.6613	11.6817	11.7078
ENSG00000179388.9 EGR3	534.389	-1.10811	0.0780102	-14.2046	8.57596e-46	2.45216e-44	10.2966	10.2534	10.3361	10.3099	9.74845	9.66956	9.69993	9.67868
ENSG00000162591.16 MEGF6	215.832	1.81461	0.127845	14.1939	9.99708e-46	2.85528e-44	9.05633	9.02301	9.01153	9.04703	9.78593	9.63388	9.66327	9.69155
ENSG00000173546.7 CSPG4	13063	0.585467	0.0412541	14.1917	1.03089e-45	2.941e-44	13.413	13.4308	13.418	13.4594	14.0377	14.042	13.945	13.9337
ENSG00000127585.12 FBXL16	684.727	1.01577	0.071665	14.1738	1.33082e-45	3.79237e-44	9.90608	9.93272	9.93898	9.85074	10.541	10.5209	10.4663	10.5022
ENSG00000105376.5 ICAM5	2577.77	-0.980913	0.0692197	-14.171	1.38496e-45	3.94222e-44	12.0949	11.9313	12.0015	11.8218	11.2099	11.1905	11.1501	11.1093
ENSG00000126249.8 PDCD2L	535.114	-1.17082	0.0826773	-14.1613	1.59049e-45	4.52214e-44	10.3064	10.3513	10.3606	10.2326	9.64764	9.66686	9.71274	9.68605
ENSG00000177646.20 ACAD9	780.355	1.0054	0.0710135	14.1579	1.66845e-45	4.73846e-44	9.99973	10.0229	10.0106	10.0127	10.7099	10.6433	10.5665	10.6058
ENSG00000154328.16 NEIL2	680.216	-0.986112	0.0697037	-14.1472	1.94342e-45	5.5132e-44	10.5375	10.4788	10.5161	10.4446	9.91897	9.916	9.89904	9.92089
ENSG00000198042.11 MAK16	806.907	-1.00053	0.0707293	-14.1459	1.97925e-45	5.60854e-44	10.6764	10.6286	10.7284	10.6214	10.0525	9.98163	10.0331	10.0897
ENSG00000087077.14 TRIP6	982.644	-0.982355	0.0694456	-14.1457	1.9856e-45	5.62022e-44	10.8638	10.8698	10.9408	10.7569	10.2071	10.2307	10.191	10.2184
ENSG00000136279.21 DBNL	1926.51	0.868226	0.0614013	14.1402	2.14718e-45	6.07078e-44	10.8695	10.9287	10.8609	10.9566	11.6639	11.5879	11.4845	11.5809
ENSG00000180228.14 PRKRA	1364.63	-0.881661	0.0623541	-14.1396	2.1658e-45	6.11655e-44	11.1876	11.1686	11.2179	11.1806	10.4605	10.5236	10.5999	10.611
ENSG00000115685.15 PPP1R7	1188.05	-1.0063	0.07118	-14.1373	2.23569e-45	6.3069e-44	11.1329	11.0262	11.1069	10.9994	10.3827	10.3234	10.3137	10.4541
ENSG00000197562.10 RAB40C	1333.1	-0.859835	0.060848	-14.1309	2.45119e-45	6.90712e-44	11.1989	11.1611	11.1927	11.0631	10.5622	10.5582	10.5084	10.5312
ENSG00000108582.12 CPD	2489.44	1.06523	0.0753921	14.1292	2.50992e-45	7.06471e-44	10.988	11.0351	11.0189	11.2728	11.9489	11.9255	11.968	11.9447
ENSG00000168672.4 LRATD2	2979.33	0.840301	0.0594813	14.1271	2.58411e-45	7.26543e-44	11.3062	11.3505	11.4386	11.5	12.1317	12.0982	12.0526	12.1346
ENSG00000153246.13 PLA2R1	498.207	1.35797	0.0961261	14.127	2.58878e-45	7.27046e-44	9.6181	9.45668	9.6222	9.59399	10.3142	10.29	10.2189	10.3069
ENSG00000155660.11 PDIA4	8720.67	0.78366	0.0555121	14.1169	2.98809e-45	8.38257e-44	12.8079	12.747	12.8312	12.6999	13.5996	13.5285	13.3898	13.4953
ENSG00000055483.19 USP36	932.005	-0.832714	0.0589895	-14.1163	3.01354e-45	8.4446e-44	10.7475	10.7567	10.7927	10.7727	10.2193	10.2492	10.2071	10.2242
ENSG00000132840.10 BHMT2	203.502	1.92004	0.136129	14.1046	3.56022e-45	9.96547e-44	8.99281	8.97258	9.02186	8.98561	9.70503	9.54974	9.72162	9.67497
ENSG00000029639.11 TFB1M	454.442	-1.21293	0.0860348	-14.0982	3.89812e-45	1.08992e-43	10.2189	10.1273	10.1822	10.1883	9.52552	9.5222	9.58887	9.60006
ENSG00000255874.2 PRECSIT	168.307	2.25552	0.160035	14.0939	4.14159e-45	1.15671e-43	8.79269	8.87396	8.94031	8.84271	9.60507	9.60848	9.48074	9.58605
ENSG00000078549.15 ADCYAP1R1	902.326	-0.864335	0.0613531	-14.0879	4.50861e-45	1.25783e-43	10.6944	10.77	10.7423	10.7636	10.1932	10.1791	10.1721	10.1946
ENSG00000058866.15 DGKG	298.888	-1.42981	0.101516	-14.0846	4.72284e-45	1.31614e-43	9.8618	9.86243	9.84567	9.94395	9.24703	9.27296	9.27117	9.28265
ENSG00000155093.19 PTPRN2	501.348	1.41533	0.10053	14.0787	5.13408e-45	1.42916e-43	9.50818	9.5744	9.5514	9.60252	10.4196	10.3218	10.1936	10.2497
ENSG00000166946.14 CCNDBP1	2063.09	0.805033	0.0572192	14.0693	5.86551e-45	1.63097e-43	10.9795	10.9722	11.1036	10.9753	11.6453	11.6512	11.5841	11.6875
ENSG00000159842.15 ABR	7593.61	-0.508782	0.0361873	-14.0597	6.71955e-45	1.86639e-43	13.2269	13.2318	13.1897	13.2121	12.791	12.7241	12.7296	12.7286
ENSG00000180447.7 GAS1	799.287	-1.12615	0.080103	-14.0588	6.79972e-45	1.88659e-43	10.5538	10.6942	10.7273	10.7468	9.93435	10.0101	9.99569	10.0033
ENSG00000187607.16 ZNF286A	837.709	-0.967071	0.0688269	-14.0508	7.61923e-45	2.11164e-43	10.6814	10.7029	10.7295	10.6624	10.003	10.1013	10.1308	10.0897
ENSG00000101193.8 GID8	3515.59	-0.573562	0.0408382	-14.0448	8.29566e-45	2.29659e-43	12.2558	12.2076	12.2397	12.199	11.7079	11.7152	11.7503	11.7506
ENSG00000269113.4 TRABD2B	144.598	2.28158	0.162564	14.035	9.52586e-45	2.63427e-43	8.80342	8.86371	8.80525	8.78036	9.50042	9.43817	9.55111	9.43202
ENSG00000196981.4 WDR5B	419.833	1.21101	0.0863626	14.0224	1.13686e-44	3.14041e-43	9.46206	9.53889	9.51995	9.53903	10.1051	10.0786	10.1334	10.1257
ENSG00000134954.14 ETS1	6484.66	0.730175	0.0520766	14.0212	1.157e-44	3.19255e-43	12.3503	12.3682	12.4483	12.4925	13.0249	13.0374	13.1314	13.1372
ENSG00000213676.13 ATF6B	1759.18	0.806186	0.0574999	14.0207	1.16532e-44	3.21201e-43	10.815	10.8284	10.8392	10.8708	11.5282	11.4926	11.3891	11.4092
ENSG00000149256.16 TENM4	989.179	1.29655	0.0924846	14.0191	1.19184e-44	3.28152e-43	10.0763	10.0302	9.99926	10.2413	11.0337	10.9621	10.8869	10.8651
ENSG00000086061.16 DNAJA1	5469.95	-0.660763	0.0471481	-14.0146	1.2689e-44	3.48988e-43	12.8564	12.7888	12.8909	12.7901	12.2326	12.1691	12.2417	12.2929
ENSG00000185787.15 MORF4L1	6737.8	-0.648359	0.0462783	-14.01	1.35384e-44	3.71944e-43	13.0573	13.0665	13.1694	13.1308	12.5056	12.443	12.5344	12.554
ENSG00000179119.15 SPTY2D1	1505.1	-0.721467	0.0515019	-14.0086	1.38195e-44	3.79254e-43	11.2233	11.2364	11.2647	11.2843	10.7296	10.6893	10.7446	10.7044
ENSG00000124422.12 USP22	7824.6	-0.467497	0.0333787	-14.0059	1.43542e-44	3.93503e-43	13.2385	13.254	13.2427	13.2236	12.8112	12.8259	12.8062	12.7775
ENSG00000095380.11 NANS	1059.42	-0.976012	0.0696906	-14.0049	1.45407e-44	3.98182e-43	10.9841	10.9003	11.0181	10.8381	10.2581	10.3028	10.2712	10.2859
ENSG00000105323.17 HNRNPUL1	9205.47	-0.514619	0.0367548	-14.0014	1.52777e-44	4.17911e-43	13.4764	13.473	13.5118	13.4567	13.0401	13.0066	12.9805	12.9579
ENSG00000104368.19 PLAT	5598.41	1.03124	0.0737638	13.9803	2.05705e-44	5.62083e-43	12.0638	12.0426	12.1887	11.9174	13.1364	12.9884	12.8923	12.911
ENSG00000135540.11 NHSL1	1307.23	0.874108	0.0625703	13.97	2.37583e-44	6.48486e-43	10.5447	10.4475	10.4645	10.5943	11.1453	11.1254	11.1597	11.1213
ENSG00000075420.13 FNDC3B	4200.44	0.808089	0.0578566	13.9671	2.47565e-44	6.75003e-43	11.7415	11.8297	11.7712	11.952	12.5221	12.5605	12.5628	12.4924
ENSG00000100628.12 ASB2	123.751	2.97785	0.21326	13.9635	2.60379e-44	7.09176e-43	8.60195	8.65798	8.69227	8.72317	9.5634	9.40387	9.33041	9.4107
ENSG00000185442.13 FAM174B	294.327	-1.48089	0.106294	-13.9321	4.04538e-44	1.10062e-42	9.88186	9.86579	9.8797	9.87932	9.16987	9.23182	9.30223	9.26881
ENSG00000141068.14 KSR1	929.67	0.994411	0.0714463	13.9183	4.90473e-44	1.33299e-42	10.2025	10.1829	10.0888	10.1543	10.7781	10.887	10.7423	10.8136
ENSG00000006327.14 TNFRSF12A	3760.22	-0.754286	0.0542645	-13.9002	6.31869e-44	1.71542e-42	12.3934	12.3183	12.4594	12.3169	11.793	11.7055	11.665	11.7157
ENSG00000173376.14 NDNF	685.835	1.01731	0.073214	13.895	6.79125e-44	1.84174e-42	9.87726	9.89564	9.8797	9.97959	10.5327	10.4616	10.513	10.5293
ENSG00000261534.1 AL596244.1	85.5965	-3.35433	0.241466	-13.8915	7.12862e-44	1.93115e-42	9.26857	9.22512	9.17042	9.32882	8.55724	8.57636	8.55975	8.53972
ENSG00000173801.17 JUP	970.88	0.98588	0.0709791	13.8897	7.31146e-44	1.97856e-42	10.1787	10.1855	10.2033	10.2276	10.9355	10.886	10.7973	10.7687
ENSG00000187736.13 NHEJ1	620.475	-1.00249	0.0721893	-13.8869	7.60501e-44	2.05579e-42	10.4384	10.4327	10.4176	10.3639	9.81801	9.81611	9.84929	9.86885
ENSG00000142303.14 ADAMTS10	214.975	1.86315	0.134172	13.8862	7.67909e-44	2.0736e-42	9.0775	8.99825	8.99039	9.02309	9.76625	9.6505	9.74412	9.62172
ENSG00000196371.3 FUT4	828.899	-0.977163	0.0704231	-13.8756	8.90571e-44	2.40226e-42	10.6699	10.702	10.6299	10.7401	10.0697	10.0041	10.1191	10.0832
ENSG00000120885.22 CLU	556.855	-1.34155	0.0967017	-13.8731	9.22417e-44	2.48551e-42	10.3884	10.3603	10.446	10.3297	9.53102	9.61984	9.70507	9.72576
ENSG00000168036.18 CTNNB1	12516.1	0.642029	0.0462794	13.8729	9.25047e-44	2.48994e-42	13.3314	13.3313	13.4217	13.2716	13.9912	13.9686	13.8813	13.9661
ENSG00000086666.19 ZFAND6	1849.84	-1.01803	0.0733872	-13.872	9.35864e-44	2.51637e-42	11.518	11.5008	11.5623	11.7093	10.7419	10.7187	10.8803	10.8166
ENSG00000105821.15 DNAJC2	895.123	-0.920862	0.0663935	-13.8698	9.65943e-44	2.59448e-42	10.7413	10.7683	10.7667	10.7256	10.1298	10.09	10.213	10.1777
ENSG00000186998.16 EMID1	660.802	1.3612	0.0981466	13.869	9.75637e-44	2.61773e-42	9.72482	9.80014	9.79268	9.72117	10.6889	10.566	10.4114	10.4937
ENSG00000104951.16 IL4I1	134.582	-2.37015	0.17103	-13.8581	1.1369e-43	3.04717e-42	9.37272	9.4039	9.4905	9.51389	8.72414	8.79408	8.79646	8.79044
ENSG00000257093.7 DENND11	1770.73	0.915683	0.0661127	13.8503	1.26627e-43	3.39034e-42	10.7553	10.7857	10.7434	10.896	11.4211	11.4568	11.5736	11.5195
ENSG00000137312.15 FLOT1	2445.77	-0.981142	0.0708687	-13.8445	1.37329e-43	3.67297e-42	11.8941	11.873	12.032	11.7962	11.2034	11.0175	11.0708	11.1279
ENSG00000140262.18 TCF12	5113.27	0.785647	0.0567564	13.8424	1.41363e-43	3.77685e-42	11.9659	12.0948	12.0699	12.1896	12.7573	12.7459	12.8278	12.8092
ENSG00000187231.14 SESTD1	1643.35	-1.06314	0.0768704	-13.8303	1.67282e-43	4.46463e-42	11.3612	11.463	11.3622	11.5921	10.5944	10.6259	10.7378	10.642
ENSG00000137831.15 UACA	2359.59	0.77213	0.0558461	13.826	1.77524e-43	4.73298e-42	11.1103	11.1661	11.1591	11.2467	11.7256	11.7868	11.8499	11.8118
ENSG00000087245.13 MMP2	3783.3	0.882872	0.0638786	13.8211	1.90163e-43	5.06459e-42	11.6358	11.5738	11.761	11.6602	12.5467	12.4143	12.36	12.3625
ENSG00000177410.13 ZFAS1	7720.06	-0.983096	0.0711313	-13.8209	1.90749e-43	5.07486e-42	13.5372	13.369	13.4682	13.2266	12.4639	12.4983	12.4129	12.5992
ENSG00000139278.10 GLIPR1	377.766	-1.47998	0.107109	-13.8175	1.99965e-43	5.31445e-42	10.0352	10.0155	10.1236	10.089	9.44827	9.43141	9.3451	9.28813
ENSG00000116044.16 NFE2L2	2441.24	-0.719597	0.0520962	-13.8128	2.13233e-43	5.66109e-42	11.7947	11.8086	11.8642	11.814	11.1843	11.2167	11.3136	11.2125
ENSG00000115008.6 IL1A	1764.27	1.26543	0.0916428	13.8083	2.2723e-43	6.02638e-42	10.5136	10.5865	10.7262	10.6767	11.418	11.4886	11.7046	11.6891
ENSG00000006125.18 AP2B1	3917.18	0.664567	0.0481394	13.805	2.37654e-43	6.29621e-42	11.7552	11.7916	11.8474	11.8691	12.4106	12.4488	12.3652	12.357
ENSG00000070718.12 AP3M2	1187.77	-0.843531	0.0611372	-13.7973	2.64447e-43	6.9987e-42	11.0443	10.9921	11.0829	10.9796	10.4643	10.3906	10.415	10.4755
ENSG00000213614.10 HEXA	3877.03	0.773546	0.0560811	13.7934	2.79471e-43	7.38856e-42	11.7327	11.7279	11.8318	11.6923	12.5207	12.3943	12.354	12.4027
ENSG00000183049.13 CAMK1D	3133.2	0.577389	0.0418654	13.7916	2.86453e-43	7.56524e-42	11.5839	11.6123	11.5528	11.6171	12.1053	12.054	12.0827	12.0824
ENSG00000103710.11 RASL12	444.09	1.36263	0.0988565	13.7839	3.18408e-43	8.40039e-42	9.48428	9.54564	9.50533	9.48337	10.1183	10.0956	10.2354	10.2747
ENSG00000110427.17 KIAA1549L	2326.19	-1.03136	0.0748772	-13.7741	3.65131e-43	9.62298e-42	11.7821	11.8417	11.7527	12.0216	11.0846	11.0544	11.0295	10.9382
ENSG00000227036.8 LINC00511	702.609	1.07736	0.0782266	13.7723	3.74165e-43	9.85079e-42	9.88339	9.93905	9.94098	9.85583	10.5864	10.5477	10.4566	10.5882
ENSG00000144645.15 OSBPL10	1453.4	0.767166	0.0557619	13.7579	4.56697e-43	1.20111e-41	10.6616	10.5951	10.7132	10.6838	11.2055	11.24	11.2483	11.2068
ENSG00000170667.15 RASA4B	552.282	-1.39248	0.101248	-13.7532	4.8714e-43	1.27985e-41	10.477	10.4778	10.2538	10.297	9.6228	9.67226	9.61006	9.61977
ENSG00000056972.20 TRAF3IP2	1780.4	0.854554	0.0621541	13.749	5.16708e-43	1.35612e-41	10.7745	10.8551	10.9147	10.7702	11.5403	11.4926	11.4166	11.4806
ENSG00000169946.14 ZFPM2	874.059	-0.894208	0.0650578	-13.7448	5.47049e-43	1.43426e-41	10.7303	10.6613	10.7688	10.7135	10.1232	10.1253	10.1503	10.1814
ENSG00000140740.11 UQCRC2	3985.93	-0.76232	0.0555025	-13.7349	6.27597e-43	1.64373e-41	12.4501	12.3738	12.5732	12.4014	11.7892	11.7612	11.7687	11.825
ENSG00000116132.12 PRRX1	3669.21	-0.859001	0.0625581	-13.7313	6.59832e-43	1.72637e-41	12.3037	12.3701	12.363	12.4651	11.5715	11.541	11.7211	11.6947
ENSG00000104142.11 VPS18	1002.49	0.859819	0.0626774	13.7182	7.90432e-43	2.06593e-41	10.2988	10.2849	10.2889	10.2326	10.8987	10.8579	10.7935	10.8492
ENSG00000176771.17 NCKAP5	206.554	-1.66734	0.121614	-13.7101	8.83855e-43	2.30771e-41	9.62003	9.61085	9.67615	9.68828	9.05254	9.07457	9.04863	9.02413
ENSG00000174010.9 KLHL15	330.974	-1.67272	0.122021	-13.7084	9.03855e-43	2.35749e-41	9.96171	9.95474	9.92897	10.1125	9.20158	9.18861	9.32856	9.28539
ENSG00000171848.16 RRM2	1754.59	0.839484	0.0612551	13.7047	9.51467e-43	2.47912e-41	10.8378	10.775	10.8804	10.7892	11.5282	11.4731	11.3682	11.4746
ENSG00000106236.4 NPTX2	873.669	0.866215	0.0632227	13.701	1.00115e-42	2.60587e-41	10.1447	10.1082	10.1969	10.1779	10.7378	10.6893	10.71	10.7044
ENSG00000130821.17 SLC6A8	3532.09	0.867407	0.0633322	13.6961	1.07062e-42	2.78384e-41	11.6263	11.5941	11.6384	11.4768	12.4277	12.37	12.2768	12.2367
ENSG00000167657.14 DAPK3	2375.12	-0.710111	0.051885	-13.6863	1.22671e-42	3.18641e-41	11.8488	11.7791	11.8001	11.6999	11.2344	11.1946	11.1977	11.2057
ENSG00000147416.11 ATP6V1B2	2337.2	-0.794913	0.0581119	-13.679	1.35531e-42	3.51683e-41	11.7906	11.7585	11.9011	11.7038	11.1776	11.1323	11.13	11.1551
ENSG00000236609.4 ZNF853	1192.22	0.734828	0.0537302	13.6762	1.40777e-42	3.64922e-41	10.4799	10.4829	10.5161	10.4655	10.9782	11.0005	11.0112	11.0051
ENSG00000164896.20 FASTK	1370.88	1.00376	0.0734448	13.6668	1.60201e-42	4.14847e-41	10.5293	10.5664	10.5236	10.3862	11.3148	11.2012	11.1472	11.232
ENSG00000262879.6 AC005670.3	798.304	0.929202	0.0680006	13.6646	1.6517e-42	4.27277e-41	9.99834	10.1165	10.0421	10.0764	10.6147	10.6384	10.6362	10.6556
ENSG00000110675.13 ELMOD1	280.743	-1.49337	0.109324	-13.6601	1.75676e-42	4.53989e-41	9.76106	9.85397	9.84351	9.90071	9.25072	9.23182	9.21194	9.19913
ENSG00000124126.14 PREX1	7065.66	0.679895	0.0498079	13.6503	2.00963e-42	5.18804e-41	12.5202	12.5602	12.5078	12.6268	13.2415	13.2307	13.114	13.138
ENSG00000096063.16 SRPK1	3836.97	-0.771231	0.0565076	-13.6483	2.06762e-42	5.3323e-41	12.3475	12.3502	12.4495	12.4716	11.6649	11.7038	11.8212	11.7437
ENSG00000103489.12 XYLT1	865.477	-1.09703	0.0803862	-13.647	2.10393e-42	5.42041e-41	10.724	10.7098	10.6789	10.899	10.0386	10.071	10.0787	10.0567
ENSG00000110013.13 SIAE	1415.45	0.937318	0.0686869	13.6463	2.1252e-42	5.46962e-41	10.5466	10.4757	10.662	10.5695	11.2114	11.1872	11.314	11.2529
ENSG00000140548.10 ZNF710	1242.25	-0.800003	0.0586581	-13.6384	2.36667e-42	6.08489e-41	11.0561	11.0755	11.0754	11.0361	10.4705	10.579	10.4821	10.46
ENSG00000101000.6 PROCR	858.235	-1.13298	0.0831137	-13.6317	2.59546e-42	6.66635e-41	10.753	10.7533	10.8422	10.6624	10.0456	10.0843	9.94053	10.0936
ENSG00000133884.10 DPF2	2470.1	-0.846359	0.0621193	-13.6247	2.85418e-42	7.3234e-41	11.8862	11.8745	11.9703	11.7542	11.2521	11.1756	11.1447	11.1674
ENSG00000178971.16 CTC1	896.877	0.872232	0.0640255	13.6232	2.91514e-42	7.47222e-41	10.193	10.1554	10.2081	10.1463	10.7591	10.7834	10.7186	10.6938
ENSG00000137809.17 ITGA11	3163.28	1.21326	0.0890663	13.622	2.96192e-42	7.58443e-41	11.2582	11.2204	11.2224	11.375	12.4821	12.3693	12.0834	12.1887
ENSG00000124098.10 FAM210B	1367.08	0.95607	0.0702197	13.6154	3.24279e-42	8.29523e-41	10.4116	10.4941	10.5826	10.5915	11.2329	11.2432	11.1455	11.213
ENSG00000100599.16 RIN3	2423.75	0.633851	0.0466944	13.5744	5.67807e-42	1.45101e-40	11.2742	11.2458	11.2923	11.256	11.844	11.759	11.769	11.7583
ENSG00000115204.15 MPV17	1338.76	0.970694	0.0715103	13.5742	5.69705e-42	1.45292e-40	10.5618	10.5123	10.5186	10.3807	11.2164	11.1938	11.1056	11.2408
ENSG00000102221.14 JADE3	869.178	-0.952771	0.0701896	-13.5742	5.69241e-42	1.45292e-40	10.7024	10.7038	10.753	10.7544	10.0748	10.0497	10.173	10.1643
ENSG00000167981.7 ZNF597	200.198	-1.77375	0.13083	-13.5577	7.13706e-42	1.81833e-40	9.6258	9.64814	9.6036	9.68237	9.01399	8.98203	8.97488	9.08578
ENSG00000197157.11 SND1	12611.5	-0.650466	0.048019	-13.546	8.36389e-42	2.12875e-40	13.9946	13.9507	14.0362	13.8779	13.4184	13.3339	13.3029	13.3245
ENSG00000116329.11 OPRD1	255.859	1.63457	0.1207	13.5424	8.78656e-42	2.23407e-40	9.07051	9.22825	9.10889	9.16672	9.80529	9.81373	9.78545	9.76582
ENSG00000271601.4 LIX1L	5730.99	-0.687222	0.0507795	-13.5335	9.92274e-42	2.52042e-40	12.8641	12.8713	12.8921	12.984	12.2216	12.2683	12.3655	12.26
ENSG00000118816.11 CCNI	14245.8	-0.571118	0.0422433	-13.5197	1.1963e-41	3.0356e-40	14.0724	14.0863	14.1222	14.1408	13.5024	13.54	13.6371	13.5458
ENSG00000066322.15 ELOVL1	2752.57	-0.762023	0.0563776	-13.5164	1.25145e-41	3.17235e-40	11.9956	11.9838	12.0657	11.8721	11.387	11.3371	11.3147	11.358
ENSG00000115520.8 COQ10B	867.197	-1.01722	0.0752831	-13.512	1.32887e-41	3.36523e-40	10.6854	10.7533	10.7413	10.7826	9.99397	10.0748	10.1573	10.1307
ENSG00000000003.15 TSPAN6	1633.23	0.672601	0.0498023	13.5054	1.45289e-41	3.67561e-40	10.8069	10.818	10.8472	10.8175	11.3188	11.3519	11.2927	11.355
ENSG00000181396.13 OGFOD3	1003.67	0.952143	0.0705248	13.5008	1.54631e-41	3.90802e-40	10.2048	10.2741	10.246	10.2388	10.9713	10.859	10.7892	10.8731
ENSG00000138002.16 IFT172	814.764	1.00912	0.0747517	13.4996	1.57293e-41	3.97135e-40	10.0592	10.0958	9.92494	10.089	10.661	10.6976	10.6751	10.6707
ENSG00000122705.17 CLTA	4673.58	-0.719286	0.0532959	-13.4961	1.64891e-41	4.15901e-40	12.6631	12.642	12.725	12.5422	12.0458	11.9618	11.9673	12.0445
ENSG00000112033.14 PPARD	1619.87	-0.804458	0.0596097	-13.4954	1.66407e-41	4.19307e-40	11.4161	11.3434	11.3186	11.3529	10.8076	10.8098	10.7197	10.6897
ENSG00000196411.10 EPHB4	2034.04	-0.695154	0.0515305	-13.4901	1.78756e-41	4.49972e-40	11.6538	11.5626	11.5403	11.6071	11.083	11.0397	11.0377	11.02
ENSG00000242125.3 SNHG3	2608.25	-0.92518	0.0686415	-13.4784	2.09519e-41	5.26886e-40	11.9531	11.9901	12.0855	11.8175	11.2401	11.1315	11.1981	11.2501
ENSG00000148848.14 ADAM12	1015.14	1.23441	0.0915934	13.477	2.13485e-41	5.36324e-40	10.0711	10.0534	10.1236	10.2887	11.0378	10.9872	10.9074	10.8702
ENSG00000197961.12 ZNF121	1650.79	-1.00297	0.0744727	-13.4677	2.4243e-41	6.08436e-40	11.4247	11.467	11.3485	11.5044	10.5458	10.6833	10.7728	10.7206
ENSG00000179431.7 FJX1	834.665	-0.98228	0.072985	-13.4587	2.73798e-41	6.86479e-40	10.6126	10.7029	10.7823	10.6687	10.0525	10.1198	10.0721	10.0553
ENSG00000181982.19 CCDC149	709.537	-0.95769	0.0711643	-13.4575	2.78339e-41	6.97174e-40	10.6023	10.5144	10.5021	10.4913	9.94006	9.96921	9.94053	9.97505
ENSG00000086544.3 ITPKC	629.808	-1.03616	0.0770472	-13.4483	3.14925e-41	7.87472e-40	10.5053	10.4014	10.4553	10.3661	9.83891	9.86485	9.82302	9.83229
ENSG00000125657.5 TNFSF9	338.299	-1.33705	0.0994218	-13.4483	3.15014e-41	7.87472e-40	9.94877	9.97942	10.0068	9.90397	9.32133	9.33134	9.34873	9.41548
ENSG00000162512.16 SDC3	3154.57	0.631528	0.0469659	13.4465	3.22676e-41	8.05829e-40	11.5489	11.6303	11.5397	11.5699	12.1658	12.1008	12.0749	12.0918
ENSG00000134243.12 SORT1	1745.4	0.939622	0.0699055	13.4413	3.46212e-41	8.63751e-40	10.716	10.733	10.7143	10.9058	11.4243	11.5455	11.5015	11.4633
ENSG00000118496.5 FBXO30	789.51	-1.02866	0.0765381	-13.4399	3.53009e-41	8.79839e-40	10.604	10.6016	10.6495	10.7384	9.95142	9.9878	10.0446	10.0594
ENSG00000185721.13 DRG1	1095.47	-0.950181	0.0707149	-13.4368	3.6809e-41	9.16523e-40	11.0298	10.9426	11.0111	10.8716	10.3015	10.3772	10.2639	10.3395
ENSG00000164056.11 SPRY1	1631.13	0.830313	0.0618661	13.4211	4.54682e-41	1.13102e-39	10.6797	10.7339	10.7999	10.794	11.3514	11.3183	11.4526	11.3696
ENSG00000237471.2 AC073115.2	288.823	1.46436	0.109142	13.417	4.80834e-41	1.19489e-39	9.26857	9.23759	9.19543	9.26211	9.91509	9.88513	9.8538	9.77942
ENSG00000074410.14 CA12	4242.25	1.08445	0.0809475	13.3969	6.30099e-41	1.56428e-39	11.6902	11.6263	11.7738	11.6453	12.839	12.6694	12.5028	12.4942
ENSG00000140365.16 COMMD4	769.004	1.28157	0.0957003	13.3915	6.77624e-41	1.68061e-39	9.92246	9.84546	9.99356	9.83013	10.8163	10.6749	10.5703	10.6309
ENSG00000187720.14 THSD4	4877.95	0.759884	0.0567474	13.3906	6.85845e-41	1.69933e-39	11.9326	12.0308	12.0179	12.1573	12.7299	12.747	12.7147	12.6661
ENSG00000161395.14 PGAP3	420.984	1.37339	0.102576	13.3889	7.01684e-41	1.73687e-39	9.45755	9.5568	9.43837	9.41174	10.2403	10.1031	10.099	10.118
ENSG00000168575.10 SLC20A2	617.397	-1.03508	0.0773146	-13.3879	7.11439e-41	1.7593e-39	10.3864	10.3959	10.3971	10.4728	9.86554	9.84883	9.76497	9.82744
ENSG00000087074.8 PPP1R15A	2060.04	-0.799784	0.0597452	-13.3866	7.24548e-41	1.78996e-39	11.72	11.6055	11.6826	11.5454	11.0212	10.9601	11.0431	11.0077
ENSG00000108039.18 XPNPEP1	2169.12	0.773825	0.0578148	13.3845	7.44664e-41	1.83786e-39	11.0941	11.0655	11.1568	10.9888	11.755	11.6836	11.6708	11.6616
ENSG00000173744.18 AGFG1	3473.08	-0.835319	0.0624149	-13.3833	7.56951e-41	1.86636e-39	12.2335	12.3216	12.2565	12.3775	11.4702	11.5735	11.6837	11.5913
ENSG00000026652.15 AGPAT4	868.697	-0.877638	0.0655824	-13.3822	7.68076e-41	1.89194e-39	10.7599	10.6685	10.7154	10.6838	10.133	10.1703	10.1109	10.1789
ENSG00000040275.17 SPDL1	1765.7	0.682971	0.0510862	13.369	9.17892e-41	2.25877e-39	10.8673	10.9323	10.8938	10.9005	11.469	11.411	11.3788	11.431
ENSG00000168079.17 SCARA5	75.1906	-4.45181	0.33346	-13.3504	1.17867e-40	2.89767e-39	9.16308	9.13224	9.19953	9.33717	8.41319	8.46661	8.44424	8.45723
ENSG00000183287.14 CCBE1	150.83	-2.16997	0.162778	-13.3308	1.53158e-40	3.76161e-39	9.49739	9.46642	9.45708	9.57016	8.85244	8.79408	8.80031	8.92246
ENSG00000008283.16 CYB561	661.217	1.00395	0.075327	13.3279	1.59338e-40	3.90959e-39	9.88339	9.93272	9.8797	9.84048	10.5184	10.5047	10.4143	10.4521
ENSG00000131069.20 ACSS2	1851.1	-0.676927	0.0508068	-13.3236	1.68843e-40	4.13878e-39	11.4932	11.487	11.4994	11.4199	10.967	10.9484	10.9114	10.9814
ENSG00000047849.21 MAP4	11952.1	-0.504071	0.0378374	-13.322	1.72316e-40	4.21981e-39	13.8658	13.8614	13.7958	13.8153	13.3884	13.3817	13.333	13.3175
ENSG00000145730.20 PAM	7787.79	0.716202	0.0537644	13.3211	1.74438e-40	4.26764e-39	12.5725	12.5902	12.7121	12.7652	13.3526	13.2881	13.3257	13.3397
ENSG00000112941.14 TENT4A	3825.61	-0.522082	0.039198	-13.3191	1.7929e-40	4.38209e-39	12.3448	12.2927	12.3006	12.3189	11.8751	11.876	11.8583	11.8337
ENSG00000145386.11 CCNA2	1255.74	-0.812745	0.0611194	-13.2976	2.3887e-40	5.83267e-39	10.9926	11.0808	11.1207	11.1099	10.5363	10.5101	10.4976	10.4648
ENSG00000101057.16 MYBL2	1089.9	1.22701	0.0923102	13.2922	2.56831e-40	6.26518e-39	10.2304	10.1395	10.2676	10.1609	11.1857	11.0607	10.8686	10.9721
ENSG00000136718.10 IMP4	1589.36	-0.787545	0.0592747	-13.2864	2.77779e-40	6.76965e-39	11.4074	11.3129	11.343	11.2607	10.7751	10.779	10.7105	10.7149
ENSG00000167491.17 GATAD2A	3944.33	-0.543084	0.0408841	-13.2835	2.88506e-40	7.02429e-39	12.3801	12.3925	12.3313	12.3391	11.8985	11.9156	11.8542	11.8838
ENSG00000111863.13 ADTRP	67.2347	-4.35262	0.327686	-13.2829	2.90958e-40	7.07718e-39	9.18465	9.13574	9.19131	9.12528	8.43441	8.42384	8.47376	8.41037
ENSG00000119403.15 PHF19	1403.24	0.713635	0.0537294	13.282	2.94397e-40	7.15393e-39	10.674	10.6792	10.6484	10.6037	11.1589	11.1562	11.1601	11.2085
ENSG00000086300.16 SNX10	512.539	1.57404	0.118548	13.2777	3.12015e-40	7.57476e-39	9.46654	9.41162	9.51413	9.68828	10.3184	10.3013	10.4107	10.3405
ENSG00000150636.17 CCDC102B	78.7903	-3.05663	0.230468	-13.2627	3.80814e-40	9.2361e-39	9.22328	9.19312	9.2117	9.17008	8.58117	8.6137	8.53874	8.57801
ENSG00000167767.14 KRT80	161.046	1.97274	0.148806	13.2571	4.10238e-40	9.94021e-39	8.85414	8.95042	8.89855	8.8891	9.57134	9.55876	9.46799	9.48895
ENSG00000146834.14 MEPCE	1430.07	-0.74857	0.0564693	-13.2562	4.15338e-40	1.00541e-38	11.1893	11.2281	11.211	11.1756	10.712	10.6845	10.6043	10.6249
ENSG00000161249.21 DMKN	136.885	2.2234	0.167749	13.2543	4.26163e-40	1.03063e-38	8.73545	8.80952	8.87976	8.80386	9.50605	9.43817	9.41528	9.41786
ENSG00000196924.19 FLNA	58101.1	-0.576861	0.04354	-13.249	4.5734e-40	1.10497e-38	16.125	16.0982	16.0571	16.1124	15.6035	15.5648	15.4869	15.4506
ENSG00000213654.10 GPSM3	1245.79	0.768409	0.0580027	13.2478	4.64593e-40	1.12142e-38	10.5654	10.5043	10.4944	10.4852	11.0517	11.0452	11.0213	11.1063
ENSG00000168434.13 COG7	593.776	-1.02281	0.0772237	-13.2448	4.83618e-40	1.16623e-38	10.4305	10.3749	10.3719	10.3251	9.85945	9.77263	9.77706	9.79621
ENSG00000083168.11 KAT6A	2003.05	-0.833722	0.0629836	-13.2371	5.35563e-40	1.29026e-38	11.5877	11.6308	11.5433	11.6991	10.8702	11.0109	11.0154	10.9498
ENSG00000266962.2 AC067852.2	892.617	0.908261	0.0686506	13.2302	5.87278e-40	1.4135e-38	10.1989	10.1751	10.1029	10.1503	10.8114	10.7163	10.6897	10.7546
ENSG00000110917.8 MLEC	9002.5	0.448854	0.0339317	13.2282	6.03319e-40	1.45072e-38	12.9891	12.9891	12.9962	13.033	13.4495	13.43	13.411	13.4027
ENSG00000104998.4 IL27RA	2071.3	-0.836745	0.0632939	-13.22	6.72736e-40	1.6161e-38	11.6787	11.692	11.7058	11.543	11.0492	11.0259	10.9139	11.0018
ENSG00000198900.7 TOP1	11078.3	0.606936	0.0460183	13.189	1.01528e-39	2.43666e-38	13.1728	13.124	13.1914	13.2854	13.735	13.7438	13.7964	13.8033
ENSG00000104450.13 SPAG1	159.578	1.94194	0.147257	13.1875	1.03601e-39	2.48407e-38	8.8963	8.86371	8.96303	8.8891	9.45124	9.53759	9.49957	9.56158
ENSG00000163961.4 RNF168	2105.85	-0.678098	0.0514249	-13.1862	1.05408e-39	2.52499e-38	11.63	11.5798	11.6015	11.6995	11.0767	11.0671	11.1223	11.0916
ENSG00000240024.5 LINC00888	477.577	1.07516	0.0815509	13.1839	1.08669e-39	2.60065e-38	9.63916	9.63173	9.66861	9.60677	10.1346	10.2018	10.2172	10.2219
ENSG00000188706.13 ZDHHC9	2368.72	0.585302	0.0444549	13.1662	1.37326e-39	3.28335e-38	11.2425	11.2552	11.3087	11.2525	11.7382	11.7362	11.7593	11.72
ENSG00000152932.8 RAB3C	77.5531	3.29893	0.250579	13.1652	1.39143e-39	3.32363e-38	8.51697	8.58044	8.5649	8.52852	9.15766	9.19743	9.26523	9.18079
ENSG00000100401.20 RANGAP1	4097.39	-0.650117	0.049402	-13.1597	1.49636e-39	3.57089e-38	12.4788	12.4631	12.4632	12.3873	11.966	11.8519	11.8305	11.867
ENSG00000095139.14 ARCN1	9581.78	-0.526322	0.0399963	-13.1593	1.50542e-39	3.58913e-38	13.5181	13.5345	13.6146	13.4872	13.0441	13.041	13.0382	13.051
ENSG00000137628.18 DDX60	586.738	-1.1028	0.0838082	-13.1586	1.51863e-39	3.6172e-38	10.2801	10.3816	10.3957	10.4645	9.74621	9.79457	9.75888	9.7641
ENSG00000188153.14 COL4A5	1193.3	1.1871	0.0902446	13.1543	1.60787e-39	3.82616e-38	10.2442	10.1712	10.3534	10.4059	11.2408	11.1254	11.0395	11.0487
ENSG00000141013.17 GAS8	475.744	1.10681	0.0841686	13.1499	1.70475e-39	4.05288e-38	9.65235	9.54115	9.63529	9.66044	10.2071	10.1931	10.1953	10.1958
ENSG00000163536.13 SERPINI1	154.612	3.18891	0.242715	13.1385	1.98116e-39	4.70557e-38	8.67046	8.69534	8.62318	8.76201	9.32133	9.4939	9.73916	9.68605
ENSG00000132199.20 ENOSF1	1987.04	0.695336	0.0529385	13.1348	2.0803e-39	4.93641e-38	11.001	11.0695	10.9818	11.0182	11.5771	11.6266	11.5176	11.5375
ENSG00000144810.16 COL8A1	159.221	-2.15563	0.164118	-13.1346	2.08483e-39	4.94252e-38	9.49304	9.57221	9.42569	9.6131	8.92987	8.87496	8.82652	8.83278
ENSG00000160209.19 PDXK	4191.12	-0.677356	0.0515791	-13.1324	2.14863e-39	5.089e-38	12.5493	12.5126	12.4829	12.4004	11.9285	11.9314	11.887	11.8243
ENSG00000128805.15 ARHGAP22	539.318	1.01711	0.0775344	13.1181	2.59275e-39	6.13513e-38	9.71602	9.75482	9.75594	9.7116	10.3462	10.2868	10.2542	10.2691
ENSG00000168209.6 DDIT4	30246.7	0.764765	0.0583008	13.1176	2.61174e-39	6.17426e-38	14.5317	14.4701	14.6006	14.3456	15.3159	15.2352	15.1668	15.2354
ENSG00000125968.9 ID1	6974.35	-0.837641	0.0638609	-13.1166	2.64384e-39	6.2443e-38	13.1679	13.1532	13.2932	13.2563	12.5566	12.5072	12.3092	12.4119
ENSG00000220785.7 MTMR9LP	168.117	1.95743	0.149244	13.1156	2.68048e-39	6.32493e-38	8.90973	8.91334	8.97411	8.86892	9.61777	9.56474	9.53472	9.4643
ENSG00000155561.15 NUP205	3057.36	0.524456	0.0399967	13.1125	2.7923e-39	6.58263e-38	11.5979	11.5844	11.5928	11.5782	12.0426	12.0437	12.0027	12.0389
ENSG00000106638.17 TBL2	1780.02	-0.914251	0.0697273	-13.1118	2.81799e-39	6.63699e-38	11.5585	11.4696	11.5951	11.367	10.751	10.8152	10.7821	10.8557
ENSG00000147421.18 HMBOX1	508.285	-1.14938	0.0876663	-13.1109	2.85351e-39	6.71439e-38	10.2966	10.3249	10.1591	10.2646	9.62782	9.67763	9.68045	9.62755
ENSG00000135387.21 CAPRIN1	12189.5	-0.590439	0.0450392	-13.1094	2.90722e-39	6.8344e-38	13.8501	13.8956	13.8958	13.9422	13.2596	13.3348	13.4135	13.3204
ENSG00000145246.14 ATP10D	676.718	-1.21531	0.0927146	-13.1081	2.95926e-39	6.95027e-38	10.4978	10.458	10.4892	10.6926	9.78593	9.86712	9.80204	9.86257
ENSG00000087206.17 UIMC1	2900.73	-0.711563	0.0542935	-13.1058	3.04855e-39	7.15334e-38	12.0681	12.0015	12.1075	11.9381	11.3928	11.4472	11.4327	11.4647
ENSG00000261067.7 AC109460.3	160.482	-1.90464	0.145357	-13.1032	3.15598e-39	7.39853e-38	9.54197	9.53889	9.54008	9.43202	8.9573	8.88179	8.91147	8.89094
ENSG00000137692.12 DCUN1D5	2592.7	-0.766368	0.0584955	-13.1013	3.23588e-39	7.5788e-38	11.9168	11.8437	11.9672	11.9068	11.2876	11.1655	11.3247	11.3268
ENSG00000009709.12 PAX7	79.5278	3.10001	0.236966	13.0821	4.16949e-39	9.75637e-38	8.56691	8.5707	8.55193	8.58995	9.1819	9.28097	9.18836	9.17458
ENSG00000188282.12 RUFY4	92.7786	3.18758	0.243768	13.0763	4.49758e-39	1.05144e-37	8.58488	8.62546	8.53841	8.58995	9.3869	9.30067	9.16185	9.2799
ENSG00000041353.10 RAB27B	299.71	-1.95439	0.149491	-13.0736	4.65821e-39	1.08798e-37	9.79618	9.94849	9.89221	10.1275	9.05722	9.11443	9.16409	9.20816
ENSG00000102794.10 ACOD1	116.888	-6.94366	0.531413	-13.0664	5.12269e-39	1.19536e-37	9.41841	9.38565	9.50238	9.5345	8.32322	8.32855	8.29996	8.41037
ENSG00000154229.12 PRKCA	1552.07	0.998707	0.0764918	13.0564	5.84306e-39	1.36219e-37	10.6023	10.6541	10.511	10.7213	11.46	11.386	11.3491	11.2572
ENSG00000198554.12 WDHD1	913.523	0.917743	0.0703355	13.0481	6.51682e-39	1.51787e-37	10.1422	10.1568	10.1574	10.2364	10.8383	10.7611	10.6961	10.7779
ENSG00000088881.21 EBF4	1499.88	0.795531	0.0609866	13.0443	6.84403e-39	1.59261e-37	10.7216	10.7262	10.6472	10.6261	11.3141	11.3176	11.2346	11.2113
ENSG00000180035.13 ZNF48	1277.81	-0.763915	0.0585643	-13.044	6.87259e-39	1.59778e-37	11.1323	11.0494	11.1069	11.0367	10.5819	10.533	10.5023	10.5422
ENSG00000198901.14 PRC1	2209.99	-0.801515	0.0614557	-13.0422	7.04304e-39	1.6359e-37	11.7586	11.7187	11.7682	11.6453	11.1679	11.1246	11.0167	11.0283
ENSG00000166886.13 NAB2	2133.87	-0.732315	0.0561515	-13.0418	7.07938e-39	1.64283e-37	11.6542	11.6864	11.694	11.6053	11.1506	11.0507	11.0085	11.1057
ENSG00000089250.19 NOS1	70.2839	-4.71744	0.361851	-13.037	7.53964e-39	1.74803e-37	9.16308	9.18658	9.0904	9.28294	8.41319	8.44631	8.43342	8.39168
ENSG00000173120.15 KDM2A	6057.97	-0.518097	0.0397518	-13.0333	7.91149e-39	1.83256e-37	12.9458	12.9548	12.8563	12.9011	12.4341	12.4522	12.454	12.4313
ENSG00000272888.7 CHASERR	599.064	-1.36886	0.105036	-13.0323	8.01807e-39	1.85555e-37	10.4076	10.4433	10.5681	10.3884	9.54192	9.69887	9.76254	9.73635
ENSG00000103342.13 GSPT1	5011.84	-0.530271	0.04069	-13.032	8.04962e-39	1.86114e-37	12.6548	12.6766	12.7049	12.6396	12.1779	12.1545	12.2396	12.1966
ENSG00000162836.12 ACP6	3208.73	0.706358	0.0542182	13.0281	8.47291e-39	1.95722e-37	11.6234	11.5677	11.5492	11.4753	12.1881	12.1994	12.0797	12.1521
ENSG00000105409.19 ATP1A3	274.011	1.38927	0.106711	13.0191	9.53437e-39	2.2004e-37	9.19071	9.21246	9.25873	9.28	9.81801	9.83957	9.77465	9.80616
ENSG00000149564.12 ESAM	121.446	2.47784	0.190331	13.0186	9.59405e-39	2.21215e-37	8.6634	8.74292	8.73567	8.79808	9.45715	9.29284	9.40508	9.41548
ENSG00000147162.14 OGT	6151.37	0.642521	0.0493866	13.01	1.07318e-38	2.47224e-37	12.3968	12.4941	12.3104	12.3741	12.9723	13.0142	12.9896	12.9515
ENSG00000155367.15 PPM1J	268.697	-1.45872	0.112124	-13.0099	1.07528e-38	2.47481e-37	9.82545	9.83343	9.79042	9.77514	9.15354	9.17521	9.21194	9.28539
ENSG00000275342.5 PRAG1	669.56	1.0581	0.0813512	13.0065	1.12303e-38	2.58235e-37	9.84614	9.86074	9.89429	9.90234	10.5853	10.5047	10.4943	10.3919
ENSG00000178104.19 PDE4DIP	5136.1	-0.608951	0.0468271	-13.0042	1.15751e-38	2.65921e-37	12.7246	12.725	12.6636	12.8025	12.1336	12.2115	12.2174	12.1682
ENSG00000115541.11 HSPE1	1492.62	-0.767255	0.0590373	-12.9961	1.28746e-38	2.95508e-37	11.3186	11.2358	11.2366	11.2325	10.6963	10.6122	10.6984	10.7452
ENSG00000171466.10 ZNF562	557.603	-0.973632	0.0749279	-12.9943	1.31891e-38	3.0245e-37	10.3107	10.2944	10.2919	10.3446	9.73945	9.75276	9.77586	9.81603
ENSG00000090447.12 TFAP4	762.735	-0.897802	0.069114	-12.9902	1.3912e-38	3.18739e-37	10.6263	10.5741	10.5424	10.5877	10.085	10.0536	9.99469	10.0089
ENSG00000168389.18 MFSD2A	439.385	-1.22066	0.0939905	-12.9871	1.44881e-38	3.31638e-37	10.1847	10.1069	10.2145	10.0946	9.52276	9.5253	9.49646	9.60799
ENSG00000134759.14 ELP2	3030.64	-0.775911	0.0597506	-12.9858	1.47218e-38	3.3668e-37	12.0963	12.0552	12.2058	12.0638	11.4035	11.3889	11.469	11.5424
ENSG00000170921.15 TANC2	2569.13	0.732604	0.056421	12.9846	1.49593e-38	3.41803e-37	11.2425	11.292	11.2126	11.3873	11.8624	11.9032	11.9195	11.8599
ENSG00000107960.11 STN1	2342.41	0.749877	0.057772	12.9799	1.5901e-38	3.62992e-37	11.205	11.1536	11.2381	11.0936	11.7332	11.7998	11.733	11.8456
ENSG00000003989.18 SLC7A2	1553.41	-0.992822	0.0764962	-12.9787	1.61599e-38	3.68568e-37	11.2321	11.3791	11.3115	11.5166	10.583	10.6531	10.6326	10.6463
ENSG00000182054.10 IDH2	6609.53	-0.666488	0.0513692	-12.9745	1.70757e-38	3.89105e-37	13.1467	13.0624	13.1477	12.9843	12.4889	12.4828	12.417	12.5126
ENSG00000136811.16 ODF2	1878.05	-0.671981	0.0518713	-12.9548	2.20813e-38	5.02714e-37	11.5264	11.5037	11.5148	11.4167	10.9557	10.9592	10.9615	10.9998
ENSG00000143390.18 RFX5	2714.76	0.688844	0.0531942	12.9496	2.36156e-38	5.37159e-37	11.3355	11.3785	11.392	11.374	11.8787	11.9289	11.9089	12.038
ENSG00000105829.13 BET1	939.554	-1.1032	0.0852272	-12.9442	2.53445e-38	5.75967e-37	10.7506	10.8559	10.7455	10.9966	10.1443	10.1381	10.1343	10.0897
ENSG00000154027.19 AK5	562.248	-1.1198	0.0865121	-12.9438	2.54576e-38	5.78015e-37	10.3269	10.2885	10.4285	10.3355	9.77941	9.74522	9.65659	9.74509
ENSG00000101439.9 CST3	4168.97	0.838391	0.0647797	12.9422	2.60105e-38	5.9004e-37	11.8399	11.7807	11.8556	11.7198	12.6146	12.633	12.4275	12.4533
ENSG00000151883.19 PARP8	1908.74	0.621181	0.0480036	12.9403	2.66575e-38	6.04174e-37	11.0003	10.9998	10.9934	11.0456	11.4496	11.5104	11.5128	11.5009
ENSG00000173273.16 TNKS	2546.25	-1.00783	0.0778849	-12.94	2.67731e-38	6.06248e-37	11.9046	11.9039	11.8809	12.132	11.0304	11.122	11.2413	11.1451
ENSG00000143479.17 DYRK3	995.465	-0.784789	0.0606845	-12.9323	2.95954e-38	6.69557e-37	10.7806	10.8308	10.8531	10.8294	10.2857	10.2706	10.2926	10.348
ENSG00000260231.2 KDM7A-DT	256.338	-1.39867	0.108199	-12.9268	3.17712e-38	7.18137e-37	9.79947	9.78403	9.76524	9.70581	9.21317	9.18861	9.22035	9.18387
ENSG00000178927.18 CYBC1	2028.76	0.778184	0.060209	12.9247	3.26528e-38	7.37403e-37	11.0673	10.9858	10.9646	10.9874	11.7079	11.6021	11.5314	11.6147
ENSG00000130402.13 ACTN4	9496.08	0.637866	0.0493529	12.9246	3.27021e-38	7.37857e-37	12.9724	12.9963	12.9898	12.9172	13.6607	13.605	13.505	13.5011
ENSG00000169255.15 B3GALNT1	273.531	1.56167	0.120924	12.9145	3.72727e-38	8.40234e-37	9.12145	9.19638	9.2036	9.25607	9.82012	9.73762	9.87829	9.87975
ENSG00000189056.15 RELN	794.538	-1.45301	0.112556	-12.9092	3.99298e-38	8.99329e-37	10.6674	10.6933	10.6867	10.9013	9.99215	9.916	9.7254	9.80285
ENSG00000172159.16 FRMD3	1497.74	-0.968353	0.0750145	-12.9089	4.01082e-38	9.02541e-37	11.2206	11.3185	11.2508	11.4587	10.6181	10.5893	10.5472	10.6623
ENSG00000161904.12 LEMD2	2886.96	-0.650783	0.050417	-12.908	4.05656e-38	9.12021e-37	12.0045	11.9939	12.0732	11.9424	11.4067	11.4926	11.4898	11.4454
ENSG00000104129.10 DNAJC17	390.172	1.2014	0.0930748	12.9079	4.06148e-38	9.12316e-37	9.49304	9.43441	9.53723	9.42951	10.0968	10.0142	10.0321	10.054
ENSG00000229647.2 MYOSLID	562.735	1.26465	0.0980231	12.9016	4.40905e-38	9.89509e-37	9.66353	9.69791	9.70827	9.66044	10.5087	10.3876	10.2428	10.3512
ENSG00000164889.15 SLC4A2	1814.59	0.950449	0.0736749	12.9006	4.46715e-38	1.00166e-36	10.7836	10.8036	10.8192	10.8086	11.657	11.5646	11.3639	11.5321
ENSG00000204256.14 BRD2	10540.7	-0.590275	0.0457604	-12.8993	4.54388e-38	1.01796e-36	13.7518	13.7075	13.726	13.5899	13.165	13.1046	13.1394	13.1366
ENSG00000204084.13 INPP5B	534.732	1.14942	0.0892497	12.8787	5.93214e-38	1.32779e-36	9.64671	9.6842	9.67615	9.73632	10.4092	10.2574	10.2404	10.319
ENSG00000142621.19 FHAD1	91.6183	-2.54357	0.197537	-12.8764	6.11133e-38	1.36669e-36	9.28767	9.24682	9.20766	9.26512	8.6142	8.6789	8.66958	8.67997
ENSG00000177380.14 PPFIA3	654.62	-1.00643	0.0781914	-12.8714	6.52361e-38	1.45759e-36	10.5043	10.4653	10.4841	10.4005	9.81379	9.86257	9.87719	9.94754
ENSG00000167280.17 ENGASE	765.281	1.11076	0.0862995	12.871	6.55828e-38	1.46405e-36	10.0339	10.0332	9.89221	9.8609	10.6718	10.6122	10.5868	10.6732
ENSG00000152977.10 ZIC1	419.586	1.10564	0.085916	12.8689	6.73973e-38	1.50322e-36	9.58671	9.54788	9.48751	9.54802	10.0782	10.1216	10.1018	10.0713
ENSG00000129595.14 EPB41L4A	689.116	0.967416	0.0752906	12.8491	8.70354e-38	1.93951e-36	9.9531	9.97636	9.84351	9.93922	10.528	10.4475	10.5282	10.5088
ENSG00000126368.6 NR1D1	2399.17	-0.641152	0.0499121	-12.8456	9.10138e-38	2.02638e-36	11.7925	11.7638	11.8086	11.724	11.2308	11.3198	11.2444	11.2141
ENSG00000163362.11 INAVA	323.537	1.52263	0.11854	12.8448	9.19741e-38	2.04596e-36	9.21452	9.37772	9.23161	9.30042	10.0316	9.94396	9.8794	9.95047
ENSG00000198467.16 TPM2	7899.41	-0.835052	0.0650172	-12.8436	9.34723e-38	2.07745e-36	13.4747	13.3283	13.4984	13.2326	12.6614	12.5957	12.5431	12.6472
ENSG00000206149.10 HERC2P9	586.053	0.999771	0.0778921	12.8353	1.03966e-37	2.30865e-36	9.82223	9.76586	9.74421	9.85583	10.3653	10.3559	10.3253	10.396
ENSG00000167323.12 STIM1	1834.57	0.786164	0.061256	12.8341	1.05658e-37	2.34245e-36	10.8878	10.9264	10.8481	10.9005	11.5771	11.5545	11.4272	11.4315
ENSG00000160208.13 RRP1B	2018.46	-0.67871	0.0528835	-12.8341	1.05674e-37	2.34245e-36	11.5611	11.5298	11.5677	11.6497	11.0337	11.0351	11.0154	11.0904
ENSG00000204310.13 AGPAT1	2680.12	0.613154	0.0477769	12.8337	1.06172e-37	2.35142e-36	11.3825	11.416	11.3832	11.3825	11.9698	11.9027	11.8558	11.8673
ENSG00000135249.8 RINT1	680.506	-1.14163	0.0889699	-12.8316	1.09042e-37	2.41289e-36	10.5062	10.5013	10.5886	10.5236	9.79887	9.76025	9.88598	9.96787
ENSG00000117266.16 CDK18	604.992	1.0301	0.0802912	12.8296	1.11928e-37	2.47458e-36	9.7405	9.80014	9.90048	9.80562	10.3907	10.4302	10.3875	10.3691
ENSG00000082212.13 ME2	1756.65	-0.638629	0.0497882	-12.8269	1.15905e-37	2.56026e-36	11.3801	11.3807	11.423	11.4286	10.9469	10.8653	10.9213	10.9169
ENSG00000187122.17 SLIT1	133.638	2.05466	0.160211	12.8247	1.19292e-37	2.63276e-36	8.8394	8.7803	8.84708	8.84271	9.49191	9.38268	9.41019	9.39134
ENSG00000106853.20 PTGR1	477.748	1.0047	0.0783955	12.8158	1.33705e-37	2.94828e-36	9.65795	9.66029	9.63269	9.67246	10.1994	10.2069	10.1521	10.1716
ENSG00000128951.14 DUT	1314.2	0.93294	0.0728316	12.8095	1.4498e-37	3.19411e-36	10.3914	10.4549	10.5657	10.5599	11.1437	11.163	11.0966	11.2292
ENSG00000107821.15 KAZALD1	371.967	1.2729	0.0993903	12.8071	1.49572e-37	3.29242e-36	9.44848	9.41418	9.48751	9.35637	10.056	9.94609	10.036	10.05
ENSG00000196368.5 NUDT11	483.298	-1.13756	0.0888229	-12.807	1.49792e-37	3.29437e-36	10.1447	10.2212	10.2145	10.2899	9.59738	9.5912	9.67782	9.61782
ENSG00000003147.19 ICA1	1205.03	0.789723	0.0617215	12.7949	1.75002e-37	3.84547e-36	10.4978	10.5133	10.4684	10.4103	11.0237	10.9901	10.9987	11.0892
ENSG00000198133.8 TMEM229B	284.577	-1.37922	0.107815	-12.7924	1.80722e-37	3.96772e-36	9.79453	9.87749	9.81727	9.84391	9.26529	9.32756	9.21405	9.23176
ENSG00000163950.13 SLBP	1925.68	-0.658621	0.0514904	-12.7911	1.83735e-37	4.03036e-36	11.5054	11.464	11.5765	11.5185	10.9918	10.9699	11.0029	11.0398
ENSG00000139146.14 SINHCAF	6073.87	-0.799953	0.0625623	-12.7865	1.95073e-37	4.27535e-36	12.9509	12.9866	13.0732	13.0681	12.2073	12.1901	12.4055	12.3502
ENSG00000186577.14 SMIM29	1965.83	-0.858999	0.0671819	-12.7862	1.95867e-37	4.28903e-36	11.6259	11.6073	11.6848	11.4808	10.9069	10.8952	10.8934	11.0232
ENSG00000213516.10 RBMXL1	787.031	-0.791981	0.0619643	-12.7813	2.08673e-37	4.56549e-36	10.5769	10.6138	10.5754	10.5915	10.0968	10.0938	10.0972	10.1014
ENSG00000177548.13 RABEP2	678.627	-0.890104	0.0696576	-12.7783	2.16846e-37	4.74019e-36	10.5192	10.4295	10.4854	10.4477	9.96453	9.9397	9.92686	9.95047
ENSG00000127980.16 PEX1	469.349	-1.04921	0.082114	-12.7775	2.18894e-37	4.78083e-36	10.136	10.2287	10.1707	10.1675	9.59222	9.62829	9.64582	9.65625
ENSG00000165609.13 NUDT5	3259.52	0.574232	0.0449647	12.7707	2.3893e-37	5.21391e-36	11.6217	11.6114	11.6557	11.6733	12.0929	12.1305	12.1073	12.1859
ENSG00000115525.18 ST3GAL5	383.847	1.30497	0.102252	12.7623	2.66264e-37	5.80539e-36	9.31951	9.46156	9.49942	9.45681	10.0543	10.0633	10.0599	10.0351
ENSG00000178761.15 FAM219B	1149.72	1.02977	0.080705	12.7597	2.75367e-37	5.99868e-36	10.3522	10.3364	10.2919	10.3343	11.1968	11.0156	10.9163	11.0103
ENSG00000163915.7 IGF2BP2-AS1	78.1281	3.49367	0.274143	12.744	3.36846e-37	7.33163e-36	8.44157	8.49228	8.601	8.57074	9.22461	9.20181	9.14139	9.26601
ENSG00000091127.14 PUS7	818.914	-0.833187	0.065386	-12.7426	3.42836e-37	7.45557e-36	10.6075	10.646	10.6218	10.6812	10.0697	10.1068	10.1459	10.1307
ENSG00000102103.17 PQBP1	906.65	-0.959621	0.0753353	-12.738	3.63649e-37	7.90138e-36	10.8501	10.7609	10.7968	10.6678	10.2117	10.1326	10.1082	10.1581
ENSG00000205937.12 RNPS1	5351.4	-0.707762	0.0555766	-12.7349	3.78343e-37	8.21359e-36	12.8721	12.8177	12.8407	12.7416	12.2743	12.2103	12.0862	12.1536
ENSG00000145506.14 NKD2	939.121	1.07064	0.0840731	12.7347	3.79364e-37	8.22867e-36	10.2293	10.1395	10.1202	10.0536	10.9425	10.8431	10.7378	10.8054
ENSG00000103495.14 MAZ	5920.49	-0.592198	0.0465162	-12.731	3.976e-37	8.61683e-36	12.91	12.9222	12.963	12.8519	12.4009	12.3971	12.401	12.2926
ENSG00000003402.20 CFLAR	2501.29	0.683526	0.0537066	12.727	4.18356e-37	9.05889e-36	11.2381	11.2915	11.2522	11.331	11.9038	11.8363	11.8489	11.7587
ENSG00000196159.14 FAT4	156.069	2.04285	0.16054	12.7248	4.30555e-37	9.31504e-36	8.90529	8.76196	8.93451	8.89894	9.51444	9.48106	9.54815	9.48895
ENSG00000221887.6 HMSD	90.0312	-3.19846	0.251359	-12.7247	4.31386e-37	9.32504e-36	9.4137	9.20285	9.2036	9.24693	8.60352	8.50263	8.57303	8.62843
ENSG00000213390.11 ARHGAP19	1185.29	-0.745378	0.0585988	-12.72	4.57698e-37	9.88533e-36	11.0241	10.9593	10.9925	11.0106	10.4312	10.4785	10.5282	10.458
ENSG00000132823.11 OSER1	1424.36	-0.895255	0.0704119	-12.7145	4.90998e-37	1.05955e-35	11.2539	11.184	11.3554	11.157	10.5505	10.5556	10.5773	10.6606
ENSG00000175662.18 TOM1L2	1348.21	-0.746852	0.0587426	-12.714	4.94537e-37	1.06627e-35	11.1585	11.1346	11.1361	11.1105	10.6414	10.6346	10.5216	10.6006
ENSG00000133216.17 EPHB2	1164.96	-0.881313	0.0694196	-12.6954	6.26757e-37	1.3502e-35	10.9643	10.9921	10.996	11.0949	10.4312	10.4616	10.3176	10.4092
ENSG00000110031.13 LPXN	388.647	-1.21931	0.0961315	-12.6838	7.27633e-37	1.56618e-35	9.97876	10.0448	10.0585	10.118	9.40572	9.48429	9.49957	9.46657
ENSG00000062282.15 DGAT2	497.192	-1.07497	0.0847553	-12.6832	7.32865e-37	1.5761e-35	10.2712	10.206	10.2798	10.1543	9.69096	9.68031	9.63221	9.64867
ENSG00000133835.17 HSD17B4	2932.44	0.660379	0.0521215	12.67	8.67213e-37	1.86344e-35	11.5031	11.3812	11.5397	11.4643	12.0519	12.0103	11.9958	12.047
ENSG00000144747.17 TMF1	2363.19	-0.937054	0.0739715	-12.6678	8.92059e-37	1.9152e-35	11.8198	11.7552	11.869	11.9381	10.9443	11.0716	11.1879	11.1439
ENSG00000138696.11 BMPR1B	149.144	-1.97098	0.155595	-12.6674	8.96529e-37	1.92316e-35	9.39463	9.48324	9.51413	9.5162	8.81299	8.86806	8.91464	8.8863
ENSG00000164236.12 ANKRD33B	1448.52	-0.812324	0.0641316	-12.6665	9.06571e-37	1.94305e-35	11.2011	11.2529	11.1803	11.3047	10.5505	10.647	10.6944	10.6615
ENSG00000249898.8 MCPH1-AS1	286.716	-1.45121	0.114572	-12.6663	9.08972e-37	1.94654e-35	9.81091	9.77498	9.88389	9.93289	9.27607	9.18417	9.26919	9.23176
ENSG00000168256.18 NKIRAS2	1240.27	0.77824	0.0614745	12.6596	9.90498e-37	2.11933e-35	10.452	10.4992	10.5706	10.4964	11.1059	11.0425	11.001	11.0638
ENSG00000144560.15 VGLL4	3135.89	0.505536	0.0399385	12.6578	1.01241e-36	2.16439e-35	11.6025	11.6218	11.6524	11.6368	12.0499	12.0585	12.0714	12.0458
ENSG00000108559.12 NUP88	2265.43	-0.6277	0.0496079	-12.6532	1.07365e-36	2.29336e-35	11.7095	11.6838	11.7444	11.6585	11.196	11.168	11.1617	11.2491
ENSG00000164403.15 SHROOM1	244.072	1.4825	0.117174	12.6521	1.08963e-36	2.32553e-35	9.09809	9.19312	9.14898	9.19648	9.71662	9.76522	9.69606	9.7828
ENSG00000106682.16 EIF4H	9201.97	-0.468558	0.03704	-12.6501	1.11799e-36	2.38403e-35	13.4729	13.4225	13.5133	13.4343	13.0389	13.0077	13.0144	13.022
ENSG00000124145.6 SDC4	7895.07	0.516141	0.0408067	12.6484	1.14133e-36	2.43175e-35	12.7558	12.7591	12.8602	12.7873	13.2926	13.2672	13.2883	13.2345
ENSG00000104133.15 SPG11	2291.75	0.673243	0.0532633	12.6399	1.27222e-36	2.70835e-35	11.1276	11.1785	11.1591	11.2746	11.7276	11.7095	11.759	11.7145
ENSG00000176907.5 TCIM	391.891	-1.24634	0.0986241	-12.6372	1.31578e-36	2.79873e-35	9.97168	10.0244	10.1011	10.1437	9.4393	9.45489	9.46959	9.48451
ENSG00000154640.15 BTG3	1470.31	-0.70038	0.0554443	-12.6321	1.40402e-36	2.9839e-35	11.2167	11.1815	11.2858	11.1928	10.6642	10.728	10.7248	10.6938
ENSG00000198431.16 TXNRD1	3883.39	-0.507403	0.0402186	-12.6161	1.72053e-36	3.65348e-35	12.3228	12.3078	12.3651	12.3197	11.8842	11.8498	11.8905	11.917
ENSG00000132563.16 REEP2	702.556	1.01409	0.0803865	12.6151	1.743e-36	3.69809e-35	9.98439	9.9038	9.92494	9.89088	10.617	10.5384	10.4434	10.5266
ENSG00000135622.13 SEMA4F	836.9	0.982168	0.0778869	12.6102	1.8555e-36	3.93347e-35	10.0486	10.1287	10.0255	10.0974	10.7721	10.752	10.6313	10.6249
ENSG00000106993.12 CDC37L1	562.271	-1.2029	0.0953941	-12.6098	1.86553e-36	3.95143e-35	10.279	10.3603	10.3563	10.4582	9.63777	9.63945	9.77345	9.74335
ENSG00000142197.12 DOP1B	1037.59	-0.969448	0.0768941	-12.6076	1.91801e-36	4.05917e-35	10.915	10.8582	10.8813	10.9952	10.187	10.3359	10.3268	10.1982
ENSG00000050344.9 NFE2L3	3398.02	0.572858	0.0454601	12.6013	2.07599e-36	4.38982e-35	11.6354	11.6661	11.716	11.7456	12.1746	12.1966	12.1996	12.1553
ENSG00000154760.14 SLFN13	201.874	1.59672	0.126785	12.594	2.27935e-36	4.81582e-35	9.08097	9.03108	8.99039	9.10736	9.62782	9.5912	9.62672	9.66378
ENSG00000006530.18 AGK	658.104	0.892554	0.0709108	12.587	2.48954e-36	5.25551e-35	9.90308	9.86915	9.94098	9.96731	10.4618	10.4417	10.4293	10.4393
ENSG00000182218.10 HHIPL1	342.667	1.27734	0.101488	12.5861	2.51702e-36	5.30909e-35	9.36778	9.3508	9.40311	9.39102	9.99032	10.038	9.91837	9.89056
ENSG00000170190.16 SLC16A5	403.129	1.24965	0.0992908	12.5858	2.52867e-36	5.32921e-35	9.5231	9.50213	9.45708	9.42447	10.1555	10.0691	9.99868	10.1142
ENSG00000117394.24 SLC2A1	7361.36	1.08918	0.0865855	12.5792	2.74795e-36	5.78651e-35	12.3779	12.3537	12.5169	12.2136	13.567	13.4341	13.2284	13.2338
ENSG00000167700.9 MFSD3	479.806	1.30414	0.103705	12.5755	2.88017e-36	6.05988e-35	9.59266	9.53437	9.56261	9.57671	10.2915	10.2541	10.0843	10.3233
ENSG00000070081.17 NUCB2	2346.53	-0.637813	0.0507387	-12.5705	3.06612e-36	6.44574e-35	11.7713	11.7366	11.787	11.6841	11.1931	11.2191	11.2153	11.2847
ENSG00000128564.7 VGF	3393.54	0.86832	0.0690866	12.5686	3.14309e-36	6.60207e-35	11.5171	11.5129	11.6192	11.502	12.1408	12.3299	12.4113	12.2158
ENSG00000067141.17 NEO1	4281.84	0.624156	0.0496779	12.5641	3.32845e-36	6.9856e-35	11.8879	11.9392	11.932	12.0243	12.551	12.5196	12.447	12.4687
ENSG00000143641.10 GALNT2	5052.96	0.766463	0.0610583	12.553	3.82844e-36	8.02827e-35	12.0729	12.0615	12.1047	12.0687	12.8854	12.8251	12.64	12.6912
ENSG00000132122.12 SPATA6	337.964	1.19743	0.0954612	12.5436	4.30992e-36	9.03045e-35	9.3653	9.36436	9.37999	9.45925	9.9209	9.94821	9.93214	9.94608
ENSG00000102287.19 GABRE	1126.05	1.49289	0.11902	12.5432	4.33283e-36	9.07092e-35	10.2667	10.2485	9.99356	9.91691	11.1414	11.2086	11.0245	11.0941
ENSG00000111684.11 LPCAT3	1513.26	0.637084	0.0508128	12.5379	4.63221e-36	9.68965e-35	10.7537	10.7658	10.7646	10.7544	11.2493	11.2216	11.1932	11.2659
ENSG00000120437.9 ACAT2	1000.8	-0.882262	0.0703978	-12.5325	4.95611e-36	1.03586e-34	10.9204	10.845	10.8472	10.803	10.2009	10.2324	10.2784	10.3469
ENSG00000176463.14 SLCO3A1	667.627	-0.895647	0.0714721	-12.5314	5.0252e-36	1.04943e-34	10.4452	10.4369	10.4776	10.4635	9.96825	9.97543	9.90229	9.8813
ENSG00000140650.12 PMM2	891.997	-0.890453	0.0710767	-12.5281	5.2432e-36	1.09405e-34	10.7661	10.7296	10.8019	10.6498	10.2147	10.1399	10.1764	10.1257
ENSG00000158467.16 AHCYL2	422.352	-1.01685	0.081203	-12.5223	5.63882e-36	1.17563e-34	10.0944	10.0706	10.0835	10.0806	9.56605	9.56175	9.5974	9.56775
ENSG00000213689.14 TREX1	68.1473	-4.01297	0.320791	-12.5096	6.61462e-36	1.37794e-34	9.24054	9.22512	9.09507	9.06257	8.51754	8.39833	8.46434	8.4708
ENSG00000180304.14 OAZ2	2043.11	0.76073	0.0608136	12.5092	6.64727e-36	1.3836e-34	11.0555	10.9679	11.0995	10.9458	11.6681	11.635	11.5497	11.6159
ENSG00000099331.13 MYO9B	4897.35	-0.53052	0.0424192	-12.5066	6.86914e-36	1.4286e-34	12.6404	12.6545	12.5908	12.6641	12.1983	12.1994	12.1439	12.1155
ENSG00000120805.14 ARL1	2213.6	-0.626167	0.0500812	-12.503	7.18628e-36	1.49333e-34	11.6679	11.66	11.7117	11.647	11.1044	11.1672	11.2192	11.1789
ENSG00000151388.11 ADAMTS12	1923.78	0.738675	0.0590872	12.5014	7.33075e-36	1.5221e-34	10.9087	10.9499	10.9231	11.0678	11.5636	11.5678	11.5002	11.5281
ENSG00000134318.14 ROCK2	1257.64	0.93285	0.0746213	12.5011	7.36105e-36	1.52713e-34	10.3884	10.4359	10.4149	10.5686	11.0279	11.0912	11.1839	11.1339
ENSG00000135439.11 AGAP2	763.088	0.883619	0.0707137	12.4957	7.87768e-36	1.63297e-34	10.0406	10.0317	9.97435	10.1001	10.6058	10.6172	10.5607	10.5459
ENSG00000260228.6 AC009119.1	1071.7	1.1312	0.090568	12.4901	8.45554e-36	1.75132e-34	10.1173	10.162	10.2553	10.3605	11.0162	10.9679	11.0685	10.8845
ENSG00000166938.13 DIS3L	492.451	0.961403	0.0770143	12.4834	9.19294e-36	1.90249e-34	9.68555	9.71911	9.67113	9.68828	10.1855	10.1826	10.2272	10.1994
ENSG00000166979.13 EVA1C	476.627	-1.04757	0.0839467	-12.479	9.71679e-36	2.00925e-34	10.1594	10.1945	10.2209	10.1701	9.65741	9.70149	9.58602	9.63336
ENSG00000004660.15 CAMKK1	537.048	-1.07719	0.0863321	-12.4773	9.93538e-36	2.05277e-34	10.3771	10.3027	10.2843	10.2163	9.69567	9.77754	9.69088	9.69338
ENSG00000152192.8 POU4F1	550.457	0.95473	0.0765673	12.4692	1.09982e-35	2.27051e-34	9.73703	9.80723	9.77675	9.76051	10.2943	10.2408	10.316	10.3222
ENSG00000170345.10 FOS	802.551	-0.951115	0.0762908	-12.467	1.13052e-35	2.33197e-34	10.7311	10.6157	10.5436	10.6865	10.0663	10.0478	10.0311	10.0792
ENSG00000013375.16 PGM3	2429.44	-0.75563	0.0606443	-12.46	1.23294e-35	2.54117e-34	11.8119	11.8094	11.8575	11.8253	11.1067	11.2004	11.3225	11.2006
ENSG00000171843.17 MLLT3	1477.52	-0.652648	0.0524694	-12.4387	1.612e-35	3.31972e-34	11.2123	11.1938	11.2589	11.1787	10.746	10.6916	10.7446	10.7294
ENSG00000197956.10 S100A6	26631.7	0.75879	0.0610055	12.438	1.62423e-35	3.34218e-34	14.3935	14.2191	14.4304	14.2032	15.068	14.99	15.0286	15.1352
ENSG00000139697.14 SBNO1	2934.2	-0.64586	0.0519319	-12.4367	1.65235e-35	3.39728e-34	11.9876	12.0135	11.9888	12.0996	11.4453	11.441	11.544	11.4871
ENSG00000091490.11 SEL1L3	4155.51	0.619124	0.0498164	12.4281	1.83889e-35	3.77773e-34	11.8954	11.8563	11.9546	11.942	12.5371	12.4317	12.3975	12.4552
ENSG00000152669.9 CCNO	728.952	-0.870991	0.0701452	-12.417	2.11394e-35	4.33924e-34	10.5456	10.5732	10.5485	10.4707	9.96639	10.0061	10.0066	10.0459
ENSG00000168795.5 ZBTB5	1644.87	-0.757243	0.0610206	-12.4096	2.31696e-35	4.75211e-34	11.3756	11.4263	11.3859	11.2578	10.8105	10.8011	10.7446	10.8151
ENSG00000152767.17 FARP1	3379.07	0.610291	0.0492006	12.4041	2.48181e-35	5.0861e-34	11.7126	11.6428	11.5945	11.7063	12.2105	12.2207	12.1863	12.1346
ENSG00000148737.17 TCF7L2	1517.82	0.699712	0.0564302	12.3996	2.62638e-35	5.37801e-34	10.6984	10.7407	10.6912	10.8102	11.2717	11.232	11.2791	11.2359
ENSG00000073111.14 MCM2	2368.61	0.852398	0.0687665	12.3955	2.76277e-35	5.65271e-34	11.1299	11.1199	11.195	11.0949	11.9643	11.7992	11.6948	11.8254
ENSG00000169994.18 MYO7B	61.3469	-4.22152	0.340604	-12.3942	2.80901e-35	5.74267e-34	9.06699	9.17666	9.12248	9.08901	8.43441	8.51893	8.39672	8.42726
ENSG00000224184.6 MIR3681HG	109.068	2.48563	0.200661	12.3872	3.06703e-35	6.26508e-34	8.64147	8.72312	8.71012	8.75575	9.37093	9.29284	9.25924	9.41786
ENSG00000126261.13 UBA2	5469	-0.559224	0.0451587	-12.3835	3.20845e-35	6.54867e-34	12.7576	12.7892	12.8448	12.7881	12.2435	12.2406	12.3412	12.3255
ENSG00000182372.10 CLN8	562.19	-0.950008	0.0767559	-12.377	3.48063e-35	7.09845e-34	10.3679	10.3249	10.2538	10.2982	9.8159	9.76274	9.78066	9.78617
ENSG00000112118.20 MCM3	1618.98	0.867552	0.0701222	12.372	3.70411e-35	7.54814e-34	10.6895	10.7617	10.6956	10.7544	11.5066	11.3875	11.271	11.3345
ENSG00000089723.10 OTUB2	1464.51	0.806378	0.065191	12.3695	3.82281e-35	7.78374e-34	10.5654	10.6286	10.7338	10.6838	11.2965	11.2312	11.1871	11.2638
ENSG00000204120.16 GIGYF2	3470.86	-0.497549	0.0402281	-12.3682	3.88469e-35	7.90336e-34	12.168	12.19	12.1481	12.2198	11.7426	11.7545	11.7612	11.7575
ENSG00000108179.14 PPIF	2044.57	-0.746785	0.0604476	-12.3542	4.6205e-35	9.39279e-34	11.6246	11.5936	11.7069	11.5258	11.083	10.9986	10.9795	11.0411
ENSG00000188747.8 NOXA1	145.822	1.91874	0.155403	12.3468	5.06656e-35	1.02913e-33	8.90081	8.93676	8.8669	8.79224	9.45715	9.47458	9.43206	9.47334
ENSG00000197249.14 SERPINA1	407.086	1.17527	0.0952249	12.342	5.37905e-35	1.09172e-33	9.49521	9.5434	9.48149	9.49522	10.1427	10.1235	9.99569	10.058
ENSG00000108960.9 MMD	1274.89	1.02235	0.0828424	12.3409	5.45476e-35	1.1062e-33	10.3021	10.4123	10.4285	10.558	11.0517	11.1545	11.2109	11.1714
ENSG00000134871.19 COL4A2	24406.6	0.770747	0.0624567	12.3405	5.48051e-35	1.11053e-33	14.1327	14.1509	14.1513	14.3009	15.0873	14.9405	14.8312	14.8773
ENSG00000171017.11 LRRC8E	621.716	-0.899224	0.0728813	-12.3382	5.6397e-35	1.14187e-33	10.4176	10.3948	10.3957	10.3594	9.83268	9.92683	9.89471	9.84673
ENSG00000138363.15 ATIC	3186.71	-0.600771	0.0487436	-12.3251	6.63401e-35	1.34211e-33	12.1388	12.089	12.1251	12.0854	11.6228	11.638	11.517	11.6252
ENSG00000176438.12 SYNE3	1695.81	-0.662492	0.053759	-12.3234	6.77977e-35	1.3705e-33	11.335	11.4134	11.3157	11.4126	10.8345	10.8674	10.8924	10.868
ENSG00000103264.18 FBXO31	968.814	-0.756124	0.0613623	-12.3223	6.87016e-35	1.38766e-33	10.8305	10.8108	10.7614	10.7426	10.2829	10.3124	10.2647	10.2948
ENSG00000137309.20 HMGA1	85572.3	-0.548596	0.0445409	-12.3167	7.36568e-35	1.48656e-33	16.6407	16.6356	16.7246	16.5614	16.1588	16.0741	16.0938	16.0594
ENSG00000204644.10 ZFP57	487.774	0.980328	0.0796093	12.3142	7.59201e-35	1.53101e-33	9.67092	9.6743	9.69356	9.67643	10.2537	10.1543	10.1961	10.1716
ENSG00000198856.13 OSTC	1839.97	-0.666948	0.054165	-12.3133	7.68397e-35	1.54832e-33	11.4328	11.484	11.4969	11.4512	10.8739	10.9484	11.0034	10.9647
ENSG00000165392.11 WRN	733.991	-0.967993	0.0786328	-12.3103	7.97319e-35	1.60532e-33	10.5145	10.5894	10.5046	10.6444	9.94764	9.92251	9.99569	10.0378
ENSG00000116667.15 C1orf21	1104.92	-0.679152	0.0552517	-12.292	1.0003e-34	2.0124e-33	10.932	10.8958	10.9015	10.8831	10.4118	10.4446	10.4497	10.4393
ENSG00000145703.16 IQGAP2	822.93	1.23912	0.100812	12.2915	1.00653e-34	2.02332e-33	9.89403	9.89236	9.90254	10.1569	10.7161	10.7757	10.7311	10.7189
ENSG00000197381.16 ADARB1	801.143	-1.03031	0.0838516	-12.2873	1.06026e-34	2.12963e-33	10.7256	10.6559	10.5399	10.7187	9.97195	10.118	10.0086	10.0019
ENSG00000134014.17 ELP3	974.841	-0.765085	0.062362	-12.2685	1.33779e-34	2.68493e-33	10.8364	10.7938	10.807	10.751	10.2742	10.2408	10.3168	10.319
ENSG00000163697.17 APBB2	1832.94	-0.882878	0.0719875	-12.2643	1.40791e-34	2.82343e-33	11.4573	11.4998	11.5074	11.6355	10.7581	10.8076	10.9567	10.8499
ENSG00000069974.16 RAB27A	962.836	1.16591	0.0950856	12.2617	1.45344e-34	2.91241e-33	9.99973	10.1205	10.1355	10.2264	10.7449	10.8548	10.9983	10.9106
ENSG00000181649.8 PHLDA2	1543.48	0.774334	0.0631925	12.2536	1.60765e-34	3.21886e-33	10.763	10.6827	10.7562	10.6776	11.1946	11.3665	11.2998	11.3158
ENSG00000100335.15 MIEF1	1941.51	-0.611852	0.0499362	-12.2527	1.62524e-34	3.25152e-33	11.4799	11.478	11.5282	11.5572	10.9884	11.0397	11.0507	11.0468
ENSG00000144043.12 TEX261	1499.89	0.668921	0.0546056	12.2501	1.67875e-34	3.3559e-33	10.7358	10.7483	10.7316	10.729	11.2924	11.244	11.172	11.2209
ENSG00000166557.14 TMED3	4307.68	-0.841386	0.0687343	-12.2411	1.87376e-34	3.74278e-33	12.6732	12.5502	12.6802	12.3912	11.8605	11.8368	11.7974	11.8599
ENSG00000145216.16 FIP1L1	3640.19	-0.729142	0.0595688	-12.2403	1.89241e-34	3.77705e-33	12.3575	12.2369	12.4291	12.2643	11.6966	11.6132	11.7358	11.7247
ENSG00000276180.1 H4C9	387.949	-1.21519	0.0992876	-12.2391	1.92066e-34	3.8304e-33	10.0606	10.0888	10.0959	9.94395	9.45715	9.42117	9.46155	9.51733
ENSG00000069020.18 MAST4	4258.9	-0.832004	0.0679882	-12.2375	1.9602e-34	3.90617e-33	12.5603	12.5381	12.4635	12.6736	11.7241	11.8332	11.9586	11.7915
ENSG00000166887.16 VPS39	2155.51	0.666993	0.0545157	12.2349	2.02416e-34	4.03044e-33	11.108	11.1698	11.0929	11.1079	11.7322	11.6583	11.5881	11.6294
ENSG00000101412.13 E2F1	525.293	1.05721	0.0865114	12.2205	2.41554e-34	4.80595e-33	9.68555	9.75296	9.66608	9.70774	10.3571	10.2121	10.2247	10.2992
ENSG00000173517.10 PEAK1	1807.02	-0.904743	0.0740419	-12.2193	2.45076e-34	4.87219e-33	11.4799	11.5091	11.423	11.6395	10.7265	10.887	10.8894	10.7764
ENSG00000155729.13 KCTD18	591.169	-1.09627	0.0897691	-12.2121	2.68027e-34	5.32426e-33	10.3407	10.3981	10.419	10.3928	9.8876	9.70149	9.79021	9.70247
ENSG00000047346.12 FAM214A	470.636	1.13636	0.0930653	12.2103	2.73819e-34	5.43505e-33	9.53362	9.65828	9.6036	9.636	10.1523	10.1686	10.2776	10.1704
ENSG00000106028.11 SSBP1	1087.92	0.74406	0.0609396	12.2098	2.75568e-34	5.46546e-33	10.4646	10.3904	10.3534	10.3706	10.9239	10.9085	10.8742	10.9148
ENSG00000182704.8 TSKU	1918.68	0.642514	0.0526261	12.209	2.78145e-34	5.51226e-33	11.0164	10.99	11.0224	10.9909	11.5692	11.5333	11.4793	11.4435
ENSG00000196782.12 MAML3	873.905	0.939245	0.0769327	12.2087	2.79475e-34	5.53426e-33	10.1594	10.111	10.0458	10.1896	10.8201	10.7314	10.6996	10.664
ENSG00000196547.15 MAN2A2	2010.74	-0.80288	0.065764	-12.2085	2.8e-34	5.54031e-33	11.6117	11.6843	11.56	11.5819	11.0443	11.0671	10.9029	10.9127
ENSG00000139880.19 CDH24	623.707	0.919981	0.0753639	12.2072	2.84531e-34	5.62556e-33	9.91355	9.86411	9.84567	9.85921	10.3226	10.4302	10.4229	10.4203
ENSG00000134291.12 TMEM106C	1135.74	0.865685	0.0709326	12.2043	2.9472e-34	5.82245e-33	10.3945	10.3444	10.4931	10.3099	11.0146	11.0033	10.9217	10.9886
ENSG00000130939.20 UBE4B	2030.8	0.601623	0.0493075	12.2014	3.05374e-34	6.0282e-33	11.0418	11.1129	11.0703	11.115	11.6004	11.5703	11.5434	11.5276
ENSG00000158941.16 CCAR2	2859.04	-0.679499	0.0557296	-12.1928	3.39612e-34	6.69884e-33	12.0184	11.9772	12.0192	11.9879	11.5241	11.4039	11.3393	11.4657
ENSG00000119523.10 ALG2	984.362	-0.745127	0.0611176	-12.1917	3.4421e-34	6.78423e-33	10.7866	10.8403	10.8009	10.7785	10.2507	10.3171	10.3398	10.3102
ENSG00000087903.13 RFX2	676.96	0.967248	0.0793488	12.1898	3.5217e-34	6.93572e-33	9.91206	9.91996	9.91684	9.91046	10.5135	10.5277	10.3728	10.5284
ENSG00000182108.11 DEXI	631.154	-0.87295	0.0716187	-12.1888	3.56432e-34	7.01419e-33	10.3512	10.4241	10.4419	10.3829	9.91315	9.88736	9.90444	9.87509
ENSG00000135506.16 OS9	5882.21	0.728935	0.0598066	12.1882	3.59271e-34	7.06454e-33	12.2926	12.2709	12.3576	12.2383	13.0723	12.9908	12.8401	12.8974
ENSG00000156261.13 CCT8	9333.69	-0.522106	0.0428601	-12.1816	3.89448e-34	7.65198e-33	13.5157	13.489	13.5747	13.4235	13.0141	12.9938	13.0048	13.0298
ENSG00000131558.15 EXOC4	2763.98	0.540419	0.0443727	12.1791	4.01752e-34	7.88759e-33	11.4684	11.4217	11.4975	11.4618	11.9532	11.8997	11.9062	11.8884
ENSG00000130147.16 SH3BP4	3863.61	-0.49851	0.0409534	-12.1726	4.3494e-34	8.53252e-33	12.2983	12.307	12.3351	12.3321	11.907	11.921	11.8456	11.8655
ENSG00000181588.16 MEX3D	1300.65	-0.759661	0.0624194	-12.1703	4.47534e-34	8.77278e-33	11.0691	11.0595	11.1973	11.0758	10.5063	10.5634	10.5836	10.5722
ENSG00000169021.6 UQCRFS1	2279.99	-0.630351	0.0517996	-12.169	4.54344e-34	8.89936e-33	11.7323	11.6795	11.7501	11.6685	11.2164	11.1528	11.1675	11.2605
ENSG00000185885.17 IFITM1	1993.53	-0.93659	0.0769813	-12.1665	4.68942e-34	9.17817e-33	11.7044	11.6299	11.716	11.4991	11.0378	10.8736	10.8266	10.8923
ENSG00000173548.9 SNX33	1703.73	0.670721	0.0551344	12.1652	4.76214e-34	9.31329e-33	10.8268	10.9235	10.8422	10.8724	11.3959	11.4166	11.3827	11.3143
ENSG00000122257.20 RBBP6	2397.57	-0.576229	0.0473729	-12.1637	4.85245e-34	9.48256e-33	11.7646	11.754	11.7208	11.7652	11.2322	11.2669	11.3339	11.29
ENSG00000169105.8 CHST14	1187.79	0.772775	0.0635487	12.1604	5.05348e-34	9.86777e-33	10.4607	10.4444	10.5097	10.4488	11.091	10.9814	10.9403	11.007
ENSG00000105379.10 ETFB	61.0711	-3.50931	0.288705	-12.1554	5.37216e-34	1.04819e-32	9.1693	9.08892	9.04707	9.09272	8.50299	8.51893	8.50001	8.45723
ENSG00000007047.15 MARK4	3215.81	-0.518436	0.0426706	-12.1497	5.75437e-34	1.1219e-32	12.1252	12.0909	12.0986	12.0555	11.677	11.6589	11.6604	11.6113
ENSG00000151090.20 THRB	364.38	1.17657	0.0968584	12.1474	5.92427e-34	1.15324e-32	9.38495	9.45668	9.45088	9.46897	10.068	9.97336	9.97454	9.94754
ENSG00000141985.9 SH3GL1	4194.34	-0.68237	0.0561741	-12.1474	5.92087e-34	1.15324e-32	12.5137	12.4944	12.5825	12.3621	11.8801	11.9357	11.8778	11.8705
ENSG00000163638.13 ADAMTS9	463.924	1.10075	0.0906174	12.1472	5.93728e-34	1.15489e-32	9.55846	9.56343	9.60628	9.7	10.1932	10.2069	10.1529	10.1482
ENSG00000103932.12 RPAP1	1441.11	0.701415	0.0577637	12.1428	6.26144e-34	1.217e-32	10.6838	10.6933	10.6609	10.6909	11.2834	11.1905	11.1671	11.1463
ENSG00000215271.9 HOMEZ	463.552	1.26063	0.103905	12.1325	7.10852e-34	1.38058e-32	9.45303	9.61506	9.61161	9.55471	10.1491	10.2591	10.1317	10.2668
ENSG00000198858.10 R3HDM4	4766.6	-0.572045	0.0471513	-12.1321	7.13883e-34	1.3854e-32	12.6304	12.6065	12.6878	12.5448	12.1546	12.0661	12.1056	12.1041
ENSG00000184640.20 SEPTIN9	5098.41	0.711788	0.0586963	12.1266	7.63384e-34	1.48033e-32	12.1666	12.0819	12.1426	12.0798	12.8829	12.7793	12.6863	12.6685
ENSG00000102858.13 MGRN1	1618.91	-0.643831	0.0531083	-12.123	7.97903e-34	1.54608e-32	11.3532	11.3412	11.2844	11.2601	10.8345	10.8548	10.8218	10.7963
ENSG00000186994.11 KANK3	146.582	1.88267	0.155399	12.115	8.79474e-34	1.70283e-32	8.88257	8.84264	8.91076	8.9038	9.54192	9.44489	9.45832	9.38399
ENSG00000065060.17 UHRF1BP1	1402.53	-0.714855	0.0590322	-12.1096	9.39714e-34	1.81808e-32	11.1487	11.1907	11.1101	11.2331	10.5978	10.6421	10.6798	10.6781
ENSG00000140545.15 MFGE8	1563.38	-0.67188	0.0555541	-12.0942	1.13396e-33	2.19221e-32	11.3325	11.2726	11.298	11.211	10.8095	10.7934	10.7513	10.7609
ENSG00000120693.14 SMAD9	612.564	-1.29733	0.107363	-12.0836	1.29018e-33	2.4923e-32	10.3575	10.4305	10.3831	10.6462	9.81379	9.6936	9.71274	9.70066
ENSG00000147316.13 MCPH1	484.908	-1.07967	0.0893731	-12.0805	1.33861e-33	2.58389e-32	10.213	10.166	10.2798	10.1805	9.6228	9.57363	9.64988	9.71507
ENSG00000147457.14 CHMP7	4890.25	0.572157	0.0473715	12.0781	1.37915e-33	2.6601e-32	12.0916	12.1038	12.2009	12.1631	12.6917	12.6369	12.5907	12.6852
ENSG00000176105.14 YES1	6892.5	-1.13738	0.0941836	-12.0762	1.41166e-33	2.72073e-32	13.1509	13.2258	13.2235	13.5562	12.0816	12.2019	12.4027	12.3158
ENSG00000145220.14 LYAR	1089.35	-0.714653	0.0591812	-12.0757	1.41992e-33	2.73456e-32	10.9354	10.8613	10.9071	10.8839	10.4402	10.4054	10.3661	10.4294
ENSG00000106344.8 RBM28	1247.65	-0.735811	0.0609434	-12.0737	1.45493e-33	2.79985e-32	11.0899	10.9942	10.9952	11.1112	10.5446	10.5006	10.5439	10.5229
ENSG00000185100.11 ADSS1	360.673	1.09275	0.0905083	12.0735	1.45821e-33	2.80403e-32	9.43933	9.45423	9.43521	9.49757	9.97934	10.0061	9.9499	9.94461
ENSG00000147894.17 C9orf72	802.718	-1.02666	0.085051	-12.0711	1.50198e-33	2.88599e-32	10.639	10.6631	10.5934	10.7619	10.0263	9.93114	10.1182	10.0172
ENSG00000099864.18 PALM	1414.05	0.833206	0.0690441	12.0677	1.56374e-33	3.00238e-32	10.6805	10.6138	10.5399	10.5858	11.2765	11.2535	11.1061	11.2175
ENSG00000213949.10 ITGA1	11399.4	1.07679	0.0892443	12.0657	1.60308e-33	3.07558e-32	12.7129	12.896	12.9217	13.228	13.9988	14.0157	13.9414	13.928
ENSG00000007255.10 TRAPPC6A	525.427	1.0665	0.0884021	12.0642	1.63244e-33	3.12952e-32	9.71955	9.6842	9.75126	9.64625	10.3653	10.2884	10.2147	10.2324
ENSG00000173905.9 GOLIM4	2588.38	0.738672	0.0612606	12.0579	1.76299e-33	3.37723e-32	11.2338	11.247	11.293	11.3878	11.8267	11.8509	11.9697	11.9356
ENSG00000145632.15 PLK2	431.221	1.111	0.0921469	12.0569	1.78442e-33	3.4157e-32	9.48208	9.53889	9.59282	9.62357	10.1491	10.0862	10.0935	10.132
ENSG00000275464.5 FP565260.1	1500.54	-0.658438	0.0546114	-12.0568	1.78622e-33	3.41656e-32	11.256	11.1828	11.2633	11.2128	10.7721	10.7372	10.6961	10.7648
ENSG00000234616.9 JRK	724.87	1.06126	0.0880345	12.055	1.82494e-33	3.48798e-32	9.95598	9.9991	9.8818	9.89088	10.6292	10.6665	10.4725	10.5163
ENSG00000131871.15 SELENOS	1615.02	-0.776551	0.0644346	-12.0518	1.89818e-33	3.6252e-32	11.3747	11.3112	11.4419	11.2566	10.7651	10.7734	10.7111	10.8099
ENSG00000147274.14 RBMX	7723.09	-0.580516	0.048181	-12.0486	1.9718e-33	3.76295e-32	13.2481	13.2308	13.3299	13.254	12.6996	12.6416	12.7705	12.7876
ENSG00000052802.13 MSMO1	2177.31	-1.22601	0.101773	-12.0464	2.02544e-33	3.86241e-32	11.6755	11.8647	11.7991	11.9488	10.6292	10.812	11.0121	10.9451
ENSG00000173039.19 RELA	5012.32	-0.572353	0.0475208	-12.0443	2.07925e-33	3.96202e-32	12.7397	12.6956	12.7006	12.596	12.2062	12.1986	12.1433	12.1384
ENSG00000222009.8 BTBD19	188.879	1.72522	0.14333	12.0367	2.27866e-33	4.33873e-32	9.04914	8.9682	8.96859	9.01493	9.712	9.57952	9.56141	9.53441
ENSG00000132405.19 TBC1D14	2100.58	-0.600047	0.0498593	-12.0348	2.33209e-33	4.43712e-32	11.5894	11.6087	11.5724	11.6248	11.1641	11.1622	11.1043	11.0663
ENSG00000254470.3 AP5B1	2545.57	-0.597932	0.0497326	-12.0229	2.69221e-33	5.11459e-32	11.8413	11.8991	11.7599	11.8171	11.3295	11.365	11.3228	11.3453
ENSG00000176058.13 TPRN	854.431	-0.921634	0.076656	-12.023	2.69051e-33	5.11459e-32	10.7342	10.7228	10.7593	10.5905	10.1117	10.0458	10.1441	10.1569
ENSG00000078053.17 AMPH	759.2	0.889606	0.073995	12.0225	2.70629e-33	5.13747e-32	10.0446	9.95005	10.1098	10.0231	10.6058	10.5995	10.5459	10.5596
ENSG00000079215.15 SLC1A3	181.392	-1.54332	0.128398	-12.0198	2.79577e-33	5.30335e-32	9.58472	9.57221	9.50238	9.55693	9.00902	8.98203	9.0408	9.05378
ENSG00000157388.19 CACNA1D	131.977	2.02755	0.168835	12.0091	3.18477e-33	6.03672e-32	8.82935	8.83182	8.78308	8.85858	9.4542	9.48106	9.38956	9.31503
ENSG00000173482.17 PTPRM	2796.66	-0.632422	0.0526659	-12.0082	3.21836e-33	6.09582e-32	11.9857	11.9428	11.9506	11.9495	11.5159	11.4616	11.365	11.3846
ENSG00000135362.14 PRR5L	255.737	-1.34028	0.111636	-12.0058	3.31156e-33	6.26763e-32	9.74739	9.82824	9.72279	9.71352	9.18588	9.23182	9.19701	9.2462
ENSG00000159131.17 GART	4724.49	-0.533486	0.0444483	-12.0024	3.45187e-33	6.5283e-32	12.5823	12.5952	12.6606	12.5282	12.1404	12.106	12.0896	12.1314
ENSG00000106635.8 BCL7B	1183.76	-0.639524	0.0532915	-12.0005	3.53232e-33	6.67545e-32	10.9742	10.9708	10.9546	10.9574	10.5339	10.5277	10.5203	10.4889
ENSG00000077721.16 UBE2A	1657.02	-0.806609	0.0672232	-11.999	3.5971e-33	6.79279e-32	11.3228	11.3992	11.438	11.3878	10.6931	10.707	10.8381	10.8564
ENSG00000163249.13 CCNYL1	1275.39	-0.838499	0.0699367	-11.9894	4.03844e-33	7.62051e-32	11.0636	11.1302	11.0745	11.1406	10.4705	10.4157	10.6092	10.5116
ENSG00000119392.15 GLE1	899.539	-0.827747	0.0690609	-11.9858	4.22005e-33	7.95728e-32	10.6838	10.7107	10.8029	10.7187	10.2223	10.2341	10.1334	10.197
ENSG00000183496.6 MEX3B	985.675	-0.732456	0.0611689	-11.9743	4.84408e-33	9.12712e-32	10.7844	10.8036	10.8101	10.7965	10.3571	10.3203	10.323	10.2474
ENSG00000011295.16 TTC19	1514.48	-0.687819	0.0574479	-11.9729	4.92655e-33	9.27557e-32	11.2517	11.1717	11.3115	11.2595	10.7591	10.6976	10.7613	10.7325
ENSG00000126767.18 ELK1	1220.38	-0.702253	0.0586779	-11.9679	5.23073e-33	9.84094e-32	11.0367	11.0186	11.0611	10.9406	10.5208	10.5477	10.511	10.5051
ENSG00000183765.23 CHEK2	630.258	-0.931644	0.0778925	-11.9606	5.7117e-33	1.07378e-31	10.478	10.4252	10.3957	10.3469	9.90535	9.81136	9.8794	9.89821
ENSG00000111445.14 RFC5	480.483	1.02194	0.085456	11.9586	5.85115e-33	1.09918e-31	9.63726	9.62134	9.71313	9.65032	10.2566	10.1668	10.1397	10.1934
ENSG00000070669.17 ASNS	846.823	-0.8819	0.0737534	-11.9574	5.93779e-33	1.11463e-31	10.7413	10.6818	10.6778	10.6343	10.1232	10.0419	10.1182	10.2054
ENSG00000168924.15 LETM1	1398.72	-0.721404	0.0603352	-11.9566	5.99599e-33	1.12472e-31	11.2084	11.1295	11.2396	11.0982	10.6771	10.6197	10.6477	10.6335
ENSG00000175582.20 RAB6A	3757.54	-0.606231	0.0507111	-11.9546	6.14147e-33	1.15115e-31	12.2419	12.3106	12.3644	12.3693	11.7446	11.7667	11.8248	11.842
ENSG00000006194.10 ZNF263	740.403	-0.790063	0.0661294	-11.9472	6.71324e-33	1.25739e-31	10.5654	10.5253	10.5436	10.4862	10.049	10.0281	10.0417	10.0726
ENSG00000120896.13 SORBS3	2098.85	-0.729387	0.0610608	-11.9452	6.8745e-33	1.28664e-31	11.7048	11.6494	11.6468	11.553	11.1559	11.0544	11.02	11.0193
ENSG00000174233.12 ADCY6	1355.55	0.639675	0.0535518	11.945	6.89676e-33	1.28985e-31	10.6723	10.6314	10.6264	10.6589	11.1184	11.1562	11.0839	11.0886
ENSG00000119326.15 CTNNAL1	683.815	-0.941526	0.0788347	-11.943	7.0587e-33	1.31916e-31	10.4865	10.4412	10.5766	10.4593	9.91897	9.86029	9.97657	9.96065
ENSG00000138078.16 PREPL	2694.56	0.767454	0.0642604	11.9429	7.07385e-33	1.32101e-31	11.2409	11.2898	11.2894	11.4608	11.9377	11.9151	12.0181	11.9514
ENSG00000140750.17 ARHGAP17	1565.58	-0.636118	0.053269	-11.9416	7.18118e-33	1.34006e-31	11.2795	11.3062	11.2596	11.2331	10.8345	10.8152	10.7881	10.7444
ENSG00000158106.14 RHPN1	566.924	1.65269	0.138415	11.9401	7.3133e-33	1.36371e-31	9.65609	9.68025	9.49942	9.37518	10.5563	10.4616	10.2973	10.4678
ENSG00000235162.9 C12orf75	962.974	-0.873607	0.0732423	-11.9276	8.4949e-33	1.58287e-31	10.779	10.7758	10.9278	10.7594	10.1761	10.264	10.233	10.2691
ENSG00000167693.17 NXN	1904.85	-0.638868	0.0535854	-11.9224	9.04367e-33	1.68388e-31	11.5004	11.4696	11.5576	11.4582	11.0614	10.964	10.9705	11.0005
ENSG00000166716.10 ZNF592	1487.16	-0.825879	0.0692816	-11.9206	9.24381e-33	1.71988e-31	11.2689	11.2966	11.178	11.3204	10.661	10.7723	10.6185	10.5918
ENSG00000154917.11 RAB6B	1454.72	0.627073	0.0526093	11.9194	9.37602e-33	1.74319e-31	10.7	10.7457	10.7667	10.6865	11.1806	11.1655	11.1839	11.2091
ENSG00000215440.12 NPEPL1	637.374	1.00848	0.0846323	11.916	9.77054e-33	1.81521e-31	9.94152	9.79301	9.83483	9.84733	10.5123	10.4489	10.3742	10.4203
ENSG00000175354.20 PTPN2	1544.98	-0.681466	0.0572118	-11.9113	1.03369e-32	1.91902e-31	11.2721	11.1999	11.3374	11.2682	10.7296	10.736	10.7799	10.7955
ENSG00000096093.16 EFHC1	496.351	0.986312	0.082808	11.9108	1.03941e-32	1.92821e-31	9.71248	9.65018	9.74421	9.64625	10.2596	10.1844	10.2122	10.1838
ENSG00000113430.10 IRX4	209.865	1.46668	0.123179	11.9069	1.08922e-32	2.01914e-31	9.11152	9.14271	9.08098	9.05095	9.69332	9.63945	9.62396	9.59208
ENSG00000196235.14 SUPT5H	5774.71	-0.569968	0.047874	-11.9056	1.10697e-32	2.05054e-31	12.9434	12.8681	12.8853	12.7813	12.3937	12.3439	12.3162	12.36
ENSG00000134285.11 FKBP11	2103.78	-0.77759	0.0653243	-11.9035	1.13437e-32	2.09974e-31	11.7537	11.6726	11.6607	11.5344	11.0854	11.0184	10.9833	11.0818
ENSG00000141524.17 TMC6	377.856	1.12643	0.0946935	11.8956	1.24815e-32	2.30866e-31	9.51032	9.51607	9.37999	9.48337	10.012	10.0321	10.0224	9.98503
ENSG00000160216.21 AGPAT3	2460.93	-0.525426	0.0442121	-11.8842	1.42975e-32	2.64263e-31	11.7631	11.7556	11.7496	11.7882	11.3612	11.3629	11.321	11.3001
ENSG00000164347.18 GFM2	1707.27	0.661891	0.0557507	11.8724	1.64767e-32	3.04319e-31	10.8002	10.8973	10.9288	10.8662	11.3638	11.3788	11.3441	11.4194
ENSG00000124116.19 WFDC3	149.895	1.91932	0.161681	11.8711	1.67303e-32	3.08777e-31	8.88257	8.9275	8.89855	8.82639	9.53649	9.53759	9.39303	9.42733
ENSG00000196141.14 SPATS2L	3233.8	-0.554712	0.0467371	-11.8688	1.71991e-32	3.17196e-31	12.1234	12.0668	12.1799	12.0812	11.6173	11.615	11.6659	11.6604
ENSG00000138496.16 PARP9	339.37	1.07777	0.0908579	11.8621	1.86258e-32	3.43258e-31	9.43702	9.39612	9.45088	9.42447	9.91315	9.93328	9.90121	9.93281
ENSG00000080854.16 IGSF9B	1214.2	-1.11784	0.09426	-11.8591	1.92987e-32	3.55401e-31	11.1556	11.1442	10.8948	11.2549	10.2566	10.3817	10.386	10.3405
ENSG00000163888.4 CAMK2N2	454.685	0.951668	0.0802596	11.8574	1.97067e-32	3.62649e-31	9.62196	9.65828	9.67866	9.60677	10.1346	10.1235	10.1406	10.118
ENSG00000226479.4 TMEM185B	1277.69	0.632485	0.0533612	11.8529	2.07874e-32	3.82226e-31	10.5636	10.5799	10.6147	10.6159	11.063	11.0535	11.0445	11.0167
ENSG00000168477.19 TNXB	267.617	-1.45007	0.122339	-11.8528	2.08008e-32	3.82226e-31	9.83026	9.84546	9.72038	9.80739	9.12842	9.25263	9.27511	9.17146
ENSG00000176692.8 FOXC2	1846.8	-0.807764	0.0681769	-11.8481	2.20237e-32	4.04403e-31	11.4652	11.4544	11.5829	11.5406	10.9721	10.9464	10.8501	10.7856
ENSG00000004864.14 SLC25A13	358.863	1.16656	0.098529	11.8398	2.43051e-32	4.45971e-31	9.37272	9.45423	9.45399	9.45681	9.93626	10.0202	9.92686	10.0255
ENSG00000139613.12 SMARCC2	2557.38	0.725394	0.0612707	11.8392	2.44853e-32	4.48951e-31	11.3192	11.3526	11.1615	11.2906	11.9583	11.8545	11.8527	11.8474
ENSG00000243943.10 ZNF512	446.722	1.0988	0.0928685	11.8317	2.67556e-32	4.90221e-31	9.59068	9.57658	9.59553	9.57671	10.204	10.1826	10.1521	10.0282
ENSG00000134668.12 SPOCD1	776.6	-0.99775	0.0843798	-11.8245	2.91567e-32	5.33827e-31	10.7	10.6469	10.5826	10.5589	10.0525	10.0691	9.90552	10.0255
ENSG00000110723.12 EXPH5	134.622	-1.95197	0.165262	-11.8113	3.41087e-32	6.24041e-31	9.41606	9.42687	9.32491	9.48337	8.82645	8.92122	8.82652	8.8225
ENSG00000104756.16 KCTD9	777.378	-1.02808	0.0870473	-11.8106	3.44204e-32	6.29289e-31	10.5529	10.5703	10.6541	10.7493	9.91897	10.0222	10.0646	9.98928
ENSG00000104980.8 TIMM44	1622.18	-0.791617	0.0670309	-11.8097	3.47696e-32	6.35212e-31	11.3928	11.357	11.4406	11.2289	10.8095	10.7734	10.714	10.7554
ENSG00000197565.16 COL4A6	73.8549	-2.75415	0.233246	-11.8079	3.55326e-32	6.48681e-31	9.10484	9.18328	9.13584	9.21257	8.65415	8.54897	8.5858	8.58692
ENSG00000164300.17 SERINC5	978.287	-0.905212	0.076698	-11.8023	3.79887e-32	6.9302e-31	10.7806	10.8403	10.7719	10.9458	10.1994	10.1931	10.2379	10.3157
ENSG00000269893.8 SNHG8	1142.96	-0.981877	0.0831978	-11.8017	3.82409e-32	6.97116e-31	11.1139	11.0124	11.0602	10.8778	10.4248	10.3155	10.2599	10.3774
ENSG00000104093.14 DMXL2	2070.01	0.871957	0.0739667	11.7885	4.47406e-32	8.15015e-31	10.8709	11.0193	10.9119	11.106	11.5647	11.6958	11.7111	11.6903
ENSG00000265491.5 RNF115	2337.91	-0.586044	0.0497172	-11.7876	4.52457e-32	8.23621e-31	11.6898	11.7082	11.725	11.7729	11.2171	11.2118	11.3028	11.2578
ENSG00000137501.17 SYTL2	133.111	1.94342	0.164897	11.7857	4.62679e-32	8.41622e-31	8.82426	8.87903	8.88608	8.79224	9.35141	9.3898	9.39821	9.48895
ENSG00000175866.15 BAIAP2	1081.41	-0.772669	0.0655634	-11.7851	4.66021e-32	8.47092e-31	10.9576	10.9257	10.8938	10.8476	10.4079	10.3297	10.4349	10.3395
ENSG00000033627.17 ATP6V0A1	1069.51	0.697222	0.0591702	11.7833	4.7566e-32	8.6399e-31	10.4076	10.4047	10.3887	10.3961	10.9346	10.825	10.8542	10.8802
ENSG00000175768.13 TOMM5	1450.23	-0.6694	0.0568302	-11.779	5.01076e-32	9.09502e-31	11.2184	11.2101	11.2057	11.1431	10.751	10.6519	10.6703	10.7373
ENSG00000164815.11 ORC5	752.386	-1.22897	0.104355	-11.7768	5.13842e-32	9.32002e-31	10.5329	10.6703	10.6989	10.6723	9.72352	9.90287	9.95611	10.0005
ENSG00000100226.16 GTPBP1	2507.86	-0.615352	0.0522549	-11.776	5.19165e-32	9.40982e-31	11.8855	11.841	11.8021	11.739	11.3441	11.3176	11.2787	11.3205
ENSG00000064102.15 INTS13	1551.03	-0.736788	0.0625687	-11.7757	5.21074e-32	9.43765e-31	11.2758	11.3434	11.3458	11.1934	10.7265	10.694	10.7468	10.7932
ENSG00000110713.17 NUP98	6357.29	-0.41681	0.0354358	-11.7624	6.09757e-32	1.10359e-30	12.9324	12.929	12.9278	12.9702	12.5867	12.5614	12.5412	12.5453
ENSG00000115884.11 SDC1	913.955	0.844346	0.0717872	11.7618	6.14112e-32	1.11068e-30	10.1496	10.1594	10.2476	10.2573	10.7439	10.6916	10.7384	10.8233
ENSG00000147419.19 CCDC25	1239.67	-0.923785	0.0785457	-11.7611	6.19091e-32	1.11888e-30	11.0151	11.1636	11.0568	11.1355	10.3571	10.362	10.5157	10.521
ENSG00000089876.12 DHX32	2176.9	0.5444	0.0463056	11.7567	6.5242e-32	1.17828e-30	11.178	11.1605	11.2284	11.1873	11.5943	11.6542	11.6096	11.636
ENSG00000101310.17 SEC23B	2835.12	-0.55403	0.0471401	-11.7528	6.82939e-32	1.23251e-30	11.9623	11.9478	11.9915	11.8894	11.466	11.4992	11.452	11.5245
ENSG00000111647.13 UHRF1BP1L	1176.59	-0.950531	0.0808885	-11.7511	6.96837e-32	1.2567e-30	10.9476	11.0642	11.0189	11.1368	10.2492	10.4098	10.4483	10.4153
ENSG00000109180.15 OCIAD1	2728.01	-0.677383	0.0576472	-11.7505	7.02163e-32	1.2654e-30	11.8799	11.9043	12.0006	11.9834	11.2951	11.3752	11.3873	11.4582
ENSG00000133019.12 CHRM3	291.639	1.26915	0.108025	11.7487	7.17191e-32	1.29156e-30	9.25467	9.33149	9.28505	9.31756	9.87962	9.74522	9.87056	9.84833
ENSG00000127948.16 POR	1530	-0.85775	0.0730229	-11.7463	7.37697e-32	1.32754e-30	11.3597	11.3202	11.3554	11.1946	10.6303	10.7152	10.588	10.7609
ENSG00000100284.22 TOM1	1033.62	-0.87654	0.0746808	-11.7371	8.22117e-32	1.4784e-30	10.9018	10.8844	10.9637	10.7842	10.3612	10.3092	10.2197	10.3025
ENSG00000235750.10 KIAA0040	5095.97	-0.485796	0.0413905	-11.7369	8.24553e-32	1.48173e-30	12.6304	12.64	12.7025	12.7201	12.2536	12.2235	12.2166	12.2557
ENSG00000021300.14 PLEKHB1	69.0879	2.96923	0.252984	11.7368	8.25226e-32	1.48188e-30	8.57602	8.47902	8.58938	8.58995	9.16582	9.12887	9.08906	9.16833
ENSG00000132383.12 RPA1	3264.82	-0.678844	0.0578423	-11.7361	8.32214e-32	1.49337e-30	12.218	12.1083	12.2583	12.0785	11.6341	11.5691	11.5437	11.6121
ENSG00000070540.13 WIPI1	1542.73	0.642325	0.0547333	11.7355	8.37819e-32	1.50236e-30	10.7798	10.7675	10.8432	10.7187	11.2258	11.2793	11.2661	11.2496
ENSG00000078070.13 MCCC1	815.877	0.769885	0.0656173	11.733	8.63941e-32	1.5481e-30	10.1273	10.0762	10.1855	10.1516	10.6392	10.5995	10.6105	10.6249
ENSG00000177606.8 JUN	7844.87	0.45299	0.0386088	11.7328	8.65458e-32	1.54972e-30	12.7763	12.7926	12.8702	12.8246	13.2574	13.2465	13.2057	13.2404
ENSG00000187601.5 MAGEH1	267.768	-1.44893	0.123526	-11.7298	8.97039e-32	1.60513e-30	9.79453	9.74366	9.86281	9.79317	9.28318	9.26893	9.16633	9.12978
ENSG00000116983.13 HPCAL4	179.616	1.65795	0.141384	11.7266	9.30922e-32	1.66458e-30	8.9567	9.00243	8.99574	9.03516	9.59222	9.47458	9.52566	9.63721
ENSG00000148840.11 PPRC1	2708.26	-0.526462	0.0449057	-11.7237	9.6339e-32	1.72142e-30	11.8937	11.9002	11.8293	11.9012	11.4751	11.4582	11.4138	11.4382
ENSG00000172354.10 GNB2	7373	-0.666437	0.056846	-11.7235	9.65449e-32	1.72388e-30	13.2783	13.2092	13.323	13.1194	12.7073	12.61	12.5742	12.5779
ENSG00000110881.12 ASIC1	773.67	0.906194	0.0773061	11.7222	9.81392e-32	1.75111e-30	10.0776	10.0649	10.0087	10.0083	10.6664	10.6592	10.5633	10.5107
ENSG00000162892.16 IL24	484.196	-1.56182	0.133269	-11.7193	1.01535e-31	1.81042e-30	10.3247	10.2571	10.3506	10.2351	9.28672	9.47133	9.56434	9.61193
ENSG00000152078.10 TLCD4	149.898	2.02736	0.173097	11.7122	1.10328e-31	1.96582e-30	8.81912	8.92281	8.78308	8.92757	9.39949	9.50342	9.56725	9.45975
ENSG00000095637.22 SORBS1	464.536	1.10128	0.0940386	11.711	1.11975e-31	1.99376e-30	9.55846	9.58525	9.63269	9.66446	10.068	10.1983	10.2063	10.2242
ENSG00000115282.21 TTC31	551.707	0.954527	0.0815182	11.7094	1.14117e-31	2.03047e-30	9.74223	9.78763	9.7606	9.79138	10.3894	10.2458	10.268	10.2792
ENSG00000186854.11 TRABD2A	581.57	0.967048	0.082674	11.6971	1.31845e-31	2.34425e-30	9.80439	9.71911	9.84567	9.84733	10.3934	10.2836	10.3405	10.3628
ENSG00000014216.16 CAPN1	3787.27	-0.581843	0.0497466	-11.6961	1.33402e-31	2.37025e-30	12.3552	12.2961	12.3782	12.2592	11.8669	11.8295	11.7544	11.821
ENSG00000130513.6 GDF15	206.008	1.65089	0.14126	11.6869	1.48775e-31	2.64155e-30	8.99671	8.99403	9.14898	9.06257	9.6671	9.67226	9.56141	9.67683
ENSG00000006062.18 MAP3K14	590.47	0.99112	0.0848497	11.6809	1.59616e-31	2.83203e-30	9.77625	9.82302	9.79719	9.82492	10.4131	10.4432	10.2696	10.3319
ENSG00000141179.14 PCTP	332.046	1.08776	0.0931601	11.6763	1.68494e-31	2.98745e-30	9.39704	9.40131	9.45708	9.39364	9.9073	9.93114	9.87609	9.90582
ENSG00000198911.12 SREBF2	7821.7	-0.429487	0.0367893	-11.6742	1.72653e-31	3.05904e-30	13.2433	13.2503	13.1878	13.2135	12.8178	12.8659	12.8033	12.8134
ENSG00000132334.17 PTPRE	573.371	0.94325	0.0808161	11.6716	1.78115e-31	3.15361e-30	9.73356	9.78403	9.85213	9.83704	10.2886	10.3711	10.2973	10.3533
ENSG00000165724.6 ZMYND19	784.857	-0.828035	0.0709544	-11.67	1.81498e-31	3.21125e-30	10.6449	10.6101	10.6218	10.5015	10.0884	10.0691	10.0712	10.0988
ENSG00000171346.16 KRT15	885.38	1.20954	0.103652	11.6692	1.83119e-31	3.23766e-30	10.0217	10.017	10.1423	9.96422	10.6675	10.707	10.8229	10.99
ENSG00000129474.16 AJUBA	1253.66	0.741398	0.0635525	11.6659	1.90378e-31	3.36366e-30	10.5725	10.5539	10.4944	10.5025	11.0171	10.9834	11.1108	11.1038
ENSG00000114126.18 TFDP2	1876.71	0.615051	0.0527314	11.6639	1.94992e-31	3.44276e-30	10.988	10.9235	11.0414	11.0251	11.4799	11.4444	11.5022	11.4586
ENSG00000166394.15 CYB5R2	419.939	-1.06019	0.0909001	-11.6632	1.96475e-31	3.46652e-30	10.0433	10.1014	10.1184	10.0792	9.49476	9.54672	9.54963	9.63143
ENSG00000059145.19 UNKL	758.734	-0.844534	0.0724465	-11.6573	2.10524e-31	3.71181e-30	10.6238	10.5664	10.5034	10.5676	10.0748	10.0767	10.0646	9.98076
ENSG00000123992.20 DNPEP	1449.79	-0.779542	0.066898	-11.6527	2.22305e-31	3.91679e-30	11.2603	11.234	11.2901	11.115	10.6889	10.6259	10.5993	10.706
ENSG00000135913.11 USP37	576.048	-1.00129	0.0859384	-11.6513	2.26066e-31	3.98027e-30	10.3364	10.3261	10.2691	10.4414	9.71662	9.82555	9.79968	9.8012
ENSG00000117899.11 MESD	1308.11	-0.623679	0.0535359	-11.6497	2.30161e-31	4.04955e-30	11.0499	11.0447	11.1019	11.0711	10.6091	10.6616	10.6006	10.611
ENSG00000066379.15 POLR1H	720.892	-0.877765	0.0753474	-11.6496	2.30634e-31	4.05505e-30	10.5672	10.5343	10.5693	10.4243	10.012	10.0061	9.96126	10.0075
ENSG00000134242.16 PTPN22	53.4406	-4.85283	0.416681	-11.6464	2.39393e-31	4.20612e-30	9.07051	9.06632	9.04707	9.07779	8.43441	8.39833	8.32762	8.41037
ENSG00000123908.12 AGO2	11414.2	-0.997016	0.0856145	-11.6454	2.42147e-31	4.25155e-30	13.9262	13.9442	13.7394	14.1529	12.8615	13.016	13.1614	12.9571
ENSG00000020577.14 SAMD4A	1978.14	0.646994	0.0555632	11.6443	2.4536e-31	4.30496e-30	11.0636	11.094	10.9546	11.0299	11.5072	11.53	11.5963	11.541
ENSG00000100099.21 HPS4	1138.43	-0.713121	0.0612505	-11.6427	2.49985e-31	4.38307e-30	10.9841	10.9108	10.9809	10.8945	10.458	10.5033	10.4236	10.4224
ENSG00000117114.20 ADGRL2	2796.94	0.603232	0.0518133	11.6424	2.50842e-31	4.39505e-30	11.385	11.433	11.4341	11.5287	11.9127	11.9464	11.9366	11.9963
ENSG00000157077.16 ZFYVE9	1815.08	-0.560447	0.0481394	-11.6422	2.51548e-31	4.40436e-30	11.3875	11.4366	11.392	11.4466	10.9557	10.9862	10.9927	10.9959
ENSG00000013374.17 NUB1	1092.86	0.673781	0.0578899	11.639	2.61038e-31	4.56735e-30	10.4226	10.4819	10.4067	10.4005	10.9177	10.8736	10.8798	10.8895
ENSG00000136193.17 SCRN1	12072.8	0.362331	0.0311591	11.6284	2.95463e-31	5.1661e-30	13.4236	13.4456	13.4469	13.4669	13.7821	13.8085	13.7882	13.786
ENSG00000115306.16 SPTBN1	9444.8	0.591792	0.0508955	11.6276	2.98395e-31	5.21375e-30	12.9256	12.9223	13.0024	13.0952	13.5866	13.5546	13.5448	13.491
ENSG00000176658.17 MYO1D	1405.81	-0.690451	0.059434	-11.6171	3.37368e-31	5.89065e-30	11.1091	11.1797	11.1496	11.2218	10.7047	10.694	10.6537	10.6023
ENSG00000196123.13 KIAA0895L	380.435	1.02938	0.0886419	11.6128	3.54787e-31	6.1905e-30	9.53989	9.47367	9.53437	9.4762	9.9976	10.0321	9.97758	9.99351
ENSG00000006283.18 CACNA1G	85.3427	2.61155	0.225067	11.6034	3.95934e-31	6.90368e-30	8.61826	8.62546	8.62318	8.68083	9.20933	9.32377	9.13446	9.20816
ENSG00000196821.10 ILRUN	3063.39	-0.487111	0.0419832	-11.6025	4.00092e-31	6.97138e-30	11.9959	12.0315	12.0557	11.9994	11.5899	11.635	11.5929	11.6185
ENSG00000168522.13 FNTA	4112.76	-0.701104	0.0604303	-11.6019	4.03223e-31	7.02109e-30	12.5316	12.4483	12.5514	12.347	11.7877	11.8452	11.9263	11.8634
ENSG00000247077.7 PGAM5	1628.35	-0.655298	0.0564924	-11.5998	4.13273e-31	7.19112e-30	11.3202	11.3118	11.3913	11.2618	10.824	10.7712	10.8501	10.8557
ENSG00000254870.5 ATP6V1G2-DDX39B	540.699	-1.54325	0.133058	-11.5983	4.20568e-31	7.31302e-30	10.3975	10.635	10.2049	10.2695	9.60507	9.54064	9.60586	9.51517
ENSG00000169764.16 UGP2	2524.25	0.657951	0.0567307	11.5978	4.22848e-31	7.34759e-30	11.2566	11.2233	11.3242	11.3984	11.8069	11.8321	11.8711	11.8495
ENSG00000237037.9 NDUFA6-DT	312.574	-1.11065	0.0958074	-11.5925	4.49689e-31	7.80863e-30	9.85243	9.83516	9.89635	9.87599	9.3869	9.32377	9.38433	9.3889
ENSG00000176454.14 LPCAT4	7153.24	-0.6126	0.0528461	-11.5922	4.51604e-31	7.8365e-30	13.2378	13.2019	13.1976	13.0503	12.6256	12.6473	12.5423	12.6173
ENSG00000103423.14 DNAJA3	2014.91	-0.650707	0.0561384	-11.5911	4.57185e-31	7.9279e-30	11.5826	11.5583	11.6255	11.4991	11.0328	11.037	11.0181	11.1273
ENSG00000105321.14 CCDC9	1147.31	-0.805889	0.069529	-11.5907	4.59403e-31	7.96089e-30	11.0648	10.9353	11.0111	10.8907	10.4364	10.4659	10.4121	10.3701
ENSG00000128731.18 HERC2	3278.52	1.00776	0.0870288	11.5796	5.22713e-31	9.05175e-30	11.4328	11.3934	11.2088	11.6257	12.2592	12.3225	12.3206	12.2033
ENSG00000181541.6 MAB21L2	79.3441	-2.82984	0.244557	-11.5713	5.76197e-31	9.97109e-30	9.18465	9.31177	9.11798	9.16335	8.54458	8.56295	8.61582	8.65132
ENSG00000078246.17 TULP3	1193.25	-0.69846	0.0603702	-11.5696	5.87428e-31	1.01585e-29	11.0106	10.9607	11.0526	10.9348	10.5292	10.4602	10.4895	10.5219
ENSG00000078177.14 N4BP2	1306.68	-1.12075	0.0968757	-11.5689	5.92145e-31	1.0233e-29	11.0586	11.1822	11.1369	11.4026	10.3029	10.4432	10.497	10.3764
ENSG00000086289.12 EPDR1	589.606	1.03821	0.0897546	11.5673	6.03846e-31	1.04281e-29	9.69999	9.74553	9.91073	9.80208	10.3747	10.3921	10.3466	10.3764
ENSG00000169826.8 CSGALNACT2	1671.27	-0.802624	0.0693975	-11.5656	6.15619e-31	1.06242e-29	11.3135	11.3581	11.3853	11.5166	10.6984	10.7989	10.8308	10.8181
ENSG00000106144.20 CASP2	586.583	1.00904	0.0872511	11.5648	6.21193e-31	1.0713e-29	9.84771	9.76219	9.7606	9.81268	10.4618	10.2771	10.3868	10.319
ENSG00000163875.16 MEAF6	1334.24	-0.661843	0.0572733	-11.5559	6.89371e-31	1.18807e-29	11.058	11.0655	11.1224	11.1545	10.5773	10.6507	10.6301	10.6344
ENSG00000008513.16 ST3GAL1	5453.55	0.481031	0.0416337	11.5539	7.05706e-31	1.21539e-29	12.2837	12.3142	12.3593	12.3476	12.7989	12.79	12.7324	12.7232
ENSG00000172780.17 RAB43	2184.01	0.765136	0.066227	11.5532	7.10954e-31	1.2236e-29	11.0449	11.1704	11.0363	11.0962	11.7732	11.7226	11.5715	11.7231
ENSG00000147853.17 AK3	3268.33	-0.707847	0.0612716	-11.5526	7.1598e-31	1.23141e-29	12.1079	12.1869	12.1327	12.284	11.5136	11.5365	11.6699	11.5779
ENSG00000135829.17 DHX9	2725.76	0.558505	0.0483633	11.5481	7.54592e-31	1.29693e-29	11.3697	11.4382	11.4489	11.4907	11.9285	11.9027	11.8653	11.9081
ENSG00000204209.13 DAXX	2039.93	-0.603221	0.0522377	-11.5476	7.58894e-31	1.30344e-29	11.6329	11.5738	11.5576	11.4966	11.0957	11.0974	11.1052	11.0619
ENSG00000148730.7 EIF4EBP2	3038.47	0.573738	0.0496973	11.5447	7.85545e-31	1.3483e-29	11.5027	11.5598	11.5354	11.6301	12.017	12.0337	12.093	12.0193
ENSG00000136754.18 ABI1	1945.46	-0.588368	0.0509652	-11.5445	7.86982e-31	1.34985e-29	11.4758	11.4954	11.4987	11.5539	10.9952	11.0443	11.0918	11.0436
ENSG00000183570.17 PCBP3	1012.5	-0.732717	0.063504	-11.5381	8.47533e-31	1.45272e-29	10.8744	10.818	10.8352	10.7752	10.2872	10.3862	10.3137	10.3575
ENSG00000132386.11 SERPINF1	1501.1	0.905888	0.0785337	11.535	8.78541e-31	1.50484e-29	10.6895	10.5539	10.7413	10.5423	11.3754	11.2871	11.1993	11.3366
ENSG00000167617.3 CDC42EP5	94.6911	-2.50869	0.217555	-11.5313	9.17444e-31	1.57042e-29	9.26857	9.26501	9.33899	9.18996	8.59252	8.73549	8.72176	8.6205
ENSG00000185033.14 SEMA4B	30709.3	-0.606592	0.0526063	-11.5308	9.22971e-31	1.57881e-29	15.2525	15.1886	15.2386	15.121	14.6964	14.66	14.5378	14.5245
ENSG00000015133.19 CCDC88C	2409.54	-0.557234	0.048334	-11.5288	9.44486e-31	1.61451e-29	11.7419	11.7387	11.7144	11.8049	11.2584	11.2848	11.2976	11.3437
ENSG00000196628.20 TCF4	1613.61	-0.88745	0.0769804	-11.5283	9.5049e-31	1.62368e-29	11.2795	11.3732	11.3136	11.5354	10.627	10.736	10.7468	10.7428
ENSG00000036257.13 CUL3	2030.8	-0.628881	0.054566	-11.5251	9.85545e-31	1.68242e-29	11.522	11.5499	11.5629	11.6426	11.0492	11.0286	11.1261	11.0824
ENSG00000146457.16 WTAP	1554.13	-0.640093	0.0555598	-11.5208	1.03655e-30	1.7683e-29	11.2371	11.2376	11.3402	11.2408	10.7631	10.7554	10.8186	10.7986
ENSG00000149925.22 ALDOA	63777.4	-0.655838	0.0569277	-11.5206	1.03938e-30	1.77193e-29	16.3432	16.2334	16.3492	16.1126	15.6729	15.6252	15.5538	15.5987
ENSG00000104738.18 MCM4	2709.15	0.671492	0.0582915	11.5195	1.05169e-30	1.79171e-29	11.2974	11.3667	11.4276	11.4073	12.0055	11.9421	11.8377	11.938
ENSG00000162639.16 HENMT1	413.754	1.05755	0.0918108	11.5187	1.06147e-30	1.80714e-29	9.49955	9.54564	9.5792	9.57016	10.1034	10.1271	10.0046	10.0527
ENSG00000134324.12 LPIN1	2913.27	-0.621246	0.053978	-11.5093	1.18499e-30	2.01609e-29	11.9714	12.0409	11.942	12.0651	11.452	11.4222	11.5212	11.537
ENSG00000229771.2 AL035665.1	74.5121	2.68171	0.233029	11.508	1.20175e-30	2.04321e-29	8.61826	8.62546	8.57736	8.58995	9.23215	9.17521	9.14827	9.08578
ENSG00000134897.14 BIVM	1213.47	-0.83641	0.0727573	-11.4959	1.38367e-30	2.35094e-29	10.965	11.0096	11.0207	11.1818	10.4235	10.4417	10.4834	10.488
ENSG00000124831.19 LRRFIP1	6028.68	-0.44468	0.0386949	-11.492	1.44791e-30	2.45844e-29	12.8836	12.8292	12.8986	12.9099	12.4699	12.4657	12.5062	12.4561
ENSG00000112200.17 ZNF451	1688.24	-0.653618	0.0568776	-11.4917	1.45273e-30	2.46496e-29	11.315	11.3263	11.3973	11.4094	10.8027	10.8516	10.8869	10.9127
ENSG00000112294.14 ALDH5A1	341.779	1.09392	0.0952176	11.4886	1.50527e-30	2.55239e-29	9.37025	9.42181	9.48149	9.43952	9.91897	9.90287	9.95714	9.92835
ENSG00000099364.18 FBXL19	1690.37	-0.636684	0.05543	-11.4863	1.54637e-30	2.62031e-29	11.3482	11.4294	11.2815	11.3681	10.8684	10.8819	10.8934	10.8535
ENSG00000134899.23 ERCC5	1711.02	-0.583317	0.0507877	-11.4854	1.56216e-30	2.64529e-29	11.4011	11.3423	11.3513	11.3243	10.8665	10.9405	10.9158	10.9175
ENSG00000125744.12 RTN2	1413.07	-0.720742	0.0627655	-11.4831	1.6045e-30	2.71517e-29	11.2089	11.1423	11.2508	11.1157	10.7213	10.6531	10.6068	10.6412
ENSG00000085871.9 MGST2	327.454	1.36273	0.118696	11.4809	1.64623e-30	2.78392e-29	9.36281	9.38302	9.35971	9.21575	9.93435	9.90945	9.87498	10.0282
ENSG00000149798.5 CDC42EP2	355.725	1.96126	0.170836	11.4804	1.65555e-30	2.79782e-29	9.15995	9.28577	8.99039	9.37518	10.0714	10.0458	10.1191	10.0962
ENSG00000271122.1 AC018647.2	294.789	1.39117	0.121206	11.4777	1.70741e-30	2.88352e-29	9.27954	9.19312	9.27761	9.32602	9.95705	9.86485	9.7601	9.86572
ENSG00000148248.14 SURF4	8486.55	-0.536547	0.0467512	-11.4766	1.72861e-30	2.91738e-29	13.4105	13.3717	13.4443	13.2767	12.8912	12.8814	12.8386	12.8916
ENSG00000116954.8 RRAGC	1124.13	-0.806895	0.0703228	-11.4741	1.77923e-30	3.0008e-29	10.9669	10.8798	10.9952	10.986	10.3324	10.3741	10.4902	10.395
ENSG00000001167.14 NFYA	1560.97	-0.604202	0.0526676	-11.472	1.82411e-30	3.07445e-29	11.2731	11.247	11.25	11.2636	10.7919	10.7429	10.8423	10.8374
ENSG00000121904.17 CSMD2	270.179	1.36393	0.11902	11.4596	2.10385e-30	3.54357e-29	9.3169	9.16325	9.17464	9.27408	9.78593	9.76274	9.83108	9.80616
ENSG00000137824.16 RMDN3	940.289	0.68889	0.060121	11.4584	2.13439e-30	3.59261e-29	10.3161	10.292	10.2661	10.2731	10.7571	10.694	10.744	10.7609
ENSG00000145293.16 ENOPH1	1119.24	-0.771762	0.0673611	-11.4571	2.16708e-30	3.6452e-29	10.9094	10.8981	10.9692	10.9931	10.3296	10.401	10.42	10.4861
ENSG00000172262.11 ZNF131	1511.69	-0.617415	0.0538901	-11.4569	2.17079e-30	3.64901e-29	11.2084	11.2017	11.2277	11.2653	10.7047	10.7745	10.7854	10.7993
ENSG00000105656.13 ELL	1355.06	-0.607113	0.053001	-11.4547	2.22609e-30	3.73948e-29	11.1346	11.1057	11.1052	11.0584	10.6512	10.6689	10.6827	10.6429
ENSG00000172137.19 CALB2	183.965	-1.75738	0.153509	-11.448	2.40517e-30	4.03762e-29	9.62003	9.53663	9.63529	9.53903	9.11123	8.92756	8.95144	8.9483
ENSG00000128394.17 APOBEC3F	977.284	0.704272	0.0615745	11.4377	2.70917e-30	4.54493e-29	10.3226	10.2849	10.3691	10.2875	10.7909	10.7633	10.8176	10.7546
ENSG00000151611.17 MMAA	209.567	-1.51364	0.132339	-11.4376	2.71191e-30	4.54651e-29	9.68918	9.5568	9.66608	9.6564	9.13267	8.99925	9.12276	9.07879
ENSG00000211445.12 GPX3	102.883	2.1218	0.18558	11.4333	2.8494e-30	4.77384e-29	8.70412	8.76814	8.77548	8.73646	9.32133	9.26082	9.22035	9.3334
ENSG00000169914.6 OTUD3	1115.23	-0.846731	0.074087	-11.4289	2.99986e-30	5.02258e-29	10.9952	11.0082	10.8491	10.9789	10.3114	10.325	10.4427	10.4224
ENSG00000106089.12 STX1A	5272.21	-0.87902	0.0769415	-11.4245	3.15378e-30	5.27679e-29	12.9697	12.947	12.8585	12.6281	12.1528	12.0882	11.9956	12.0336
ENSG00000070501.12 POLB	536.231	-0.958005	0.0838909	-11.4196	3.33589e-30	5.57779e-29	10.3407	10.2448	10.3008	10.2024	9.73945	9.72228	9.79732	9.73283
ENSG00000101911.13 PRPS2	1328.2	-0.779808	0.0682949	-11.4182	3.38996e-30	5.66445e-29	11.0524	11.1025	11.152	11.2104	10.5715	10.4771	10.6167	10.6023
ENSG00000164176.13 EDIL3	1227.92	-1.05702	0.0927008	-11.4025	4.06299e-30	6.78455e-29	11.01	11.127	11.0119	11.298	10.2771	10.3666	10.4573	10.4011
ENSG00000111249.14 CUX2	136.886	2.0526	0.180038	11.4009	4.13759e-30	6.90456e-29	8.87793	8.88405	8.68307	8.85858	9.4862	9.38268	9.42705	9.44135
ENSG00000136536.15 MARCHF7	2451.65	-0.749567	0.0657701	-11.3968	4.33899e-30	7.23586e-29	11.7665	11.8098	11.7966	11.9592	11.1437	11.1971	11.3021	11.2458
ENSG00000029725.17 RABEP1	1975.53	-0.604966	0.0531029	-11.3923	4.56581e-30	7.60908e-29	11.5251	11.4519	11.5788	11.5595	11.0419	11.0193	11.0765	11.0744
ENSG00000183779.7 ZNF703	966.644	-0.746863	0.0655885	-11.3871	4.84848e-30	8.07483e-29	10.7522	10.8497	10.754	10.776	10.2253	10.2997	10.3276	10.2981
ENSG00000185761.11 ADAMTSL5	639.726	0.773004	0.0679042	11.3837	5.03952e-30	8.38747e-29	9.94877	9.95785	9.93499	9.91369	10.4066	10.3936	10.3757	10.3836
ENSG00000125148.7 MT2A	10646.2	0.878479	0.077172	11.3834	5.0596e-30	8.41534e-29	13.0475	12.9851	13.0491	12.8366	13.9708	13.8994	13.6672	13.6888
ENSG00000143147.14 GPR161	985.067	-0.681952	0.0599124	-11.3825	5.11283e-30	8.49827e-29	10.8121	10.7816	10.7667	10.7801	10.3612	10.2706	10.3383	10.349
ENSG00000240583.14 AQP1	157.004	1.92724	0.16933	11.3816	5.16532e-30	8.57987e-29	8.92288	8.9275	8.90468	8.83188	9.57922	9.57952	9.37908	9.4643
ENSG00000157510.14 AFAP1L1	1296.09	0.626552	0.0550556	11.3804	5.2387e-30	8.69604e-29	10.5804	10.6007	10.6756	10.5849	11.0695	11.0443	11.0592	11.0575
ENSG00000089327.15 FXYD5	4320.12	-0.532327	0.0467775	-11.38	5.26117e-30	8.72759e-29	12.5347	12.4814	12.4909	12.3891	12.0112	12.0355	11.9891	11.9872
ENSG00000135924.16 DNAJB2	957.292	-0.723601	0.0635924	-11.3787	5.33675e-30	8.84717e-29	10.8224	10.7848	10.7625	10.6935	10.2986	10.282	10.2847	10.2937
ENSG00000111110.12 PPM1H	210.778	1.40007	0.123166	11.3673	6.08442e-30	1.008e-28	9.04188	9.13923	9.14462	9.13584	9.61524	9.60561	9.67519	9.62561
ENSG00000094916.16 CBX5	2468.43	0.707663	0.0622591	11.3664	6.14515e-30	1.0174e-28	11.2244	11.2639	11.1401	11.3686	11.8513	11.8529	11.8261	11.7877
ENSG00000196136.18 SERPINA3	251.698	1.66077	0.146126	11.3653	6.22625e-30	1.03015e-28	9.0599	9.10363	9.21572	9.15314	9.73492	9.72485	9.71401	9.94167
ENSG00000184661.14 CDCA2	364.292	-0.990018	0.0871164	-11.3643	6.29499e-30	1.04084e-28	9.93861	9.9656	9.9568	9.97193	9.49476	9.51598	9.46638	9.49557
ENSG00000196498.13 NCOR2	14650.3	0.695503	0.0612361	11.3577	6.78834e-30	1.12168e-28	13.5361	13.578	13.3921	13.5808	14.2622	14.2703	14.1579	14.0674
ENSG00000111252.11 SH2B3	7927.85	0.587949	0.0517779	11.3552	6.98768e-30	1.15386e-28	12.6726	12.7513	12.7334	12.8642	13.3402	13.3334	13.298	13.2431
ENSG00000105928.16 GSDME	2745.94	0.476535	0.0419753	11.3527	7.18747e-30	1.18607e-28	11.4918	11.4741	11.5215	11.4537	11.8815	11.878	11.8743	11.8915
ENSG00000075399.14 VPS9D1	327.231	1.31359	0.115751	11.3484	7.5498e-30	1.24505e-28	9.4066	9.3003	9.30338	9.35637	10.0209	9.94396	9.81723	9.93577
ENSG00000030582.18 GRN	10496.8	0.711885	0.0627442	11.3458	7.77861e-30	1.28195e-28	13.1153	13.059	13.074	12.9945	13.8776	13.7846	13.6227	13.6385
ENSG00000281649.2 EBLN3P	4265.26	-0.610919	0.0538592	-11.3429	8.04455e-30	1.32491e-28	12.3992	12.491	12.4729	12.5813	11.9074	11.9107	12.0011	11.9729
ENSG00000005448.17 WDR54	2833.01	0.642523	0.0566611	11.3397	8.33851e-30	1.37243e-28	11.4652	11.4765	11.4788	11.3398	12.0244	12.0126	11.9035	11.9683
ENSG00000168724.17 DNAJC21	3505.44	-0.564345	0.0497765	-11.3376	8.54766e-30	1.40594e-28	12.2106	12.1647	12.2536	12.2456	11.6612	11.7255	11.7998	11.7375
ENSG00000116990.11 MYCL	213.229	-1.34018	0.118311	-11.3277	9.56988e-30	1.57305e-28	9.64483	9.62343	9.64048	9.61099	9.11987	9.20616	9.09884	9.11315
ENSG00000138061.12 CYP1B1	1701.96	-0.932936	0.0823812	-11.3246	9.91072e-30	1.62801e-28	11.3274	11.3913	11.4165	11.655	10.7109	10.7565	10.7777	10.7428
ENSG00000107819.13 SFXN3	2282.67	0.68046	0.0600946	11.3232	1.00779e-29	1.65441e-28	11.2145	11.1956	11.1748	11.1221	11.8351	11.7322	11.6811	11.6485
ENSG00000153094.24 BCL2L11	858.673	-0.871419	0.0770095	-11.3157	1.09668e-29	1.79915e-28	10.7248	10.6845	10.6733	10.7022	10.0263	10.1381	10.2297	10.1495
ENSG00000166851.15 PLK1	2204.28	-0.831539	0.0735005	-11.3134	1.12659e-29	1.84702e-28	11.743	11.6992	11.8406	11.6283	11.1997	11.0553	10.9903	11.0167
ENSG00000162430.17 SELENON	4400.46	0.568511	0.0502986	11.3027	1.27194e-29	2.08397e-28	12.013	12.0274	11.9743	12.0213	12.5963	12.5504	12.4479	12.4516
ENSG00000105856.14 HBP1	2119.01	-0.574293	0.0508117	-11.3024	1.2771e-29	2.09107e-28	11.6168	11.6042	11.6479	11.5368	11.0973	11.168	11.1443	11.1679
ENSG00000151726.15 ACSL1	1290.7	-0.738168	0.0653157	-11.3015	1.2894e-29	2.10984e-28	11.0679	11.127	11.0678	11.0877	10.5063	10.4896	10.6489	10.5784
ENSG00000213465.8 ARL2	2089.77	-0.735341	0.0650791	-11.2992	1.3242e-29	2.16538e-28	11.6647	11.6383	11.7186	11.5181	11.0965	11.0165	10.9927	11.1111
ENSG00000109971.14 HSPA8	89762.6	-0.607157	0.0537364	-11.2988	1.3303e-29	2.17395e-28	16.7346	16.7204	16.8561	16.6133	16.1668	16.0898	16.0849	16.1786
ENSG00000188290.11 HES4	901.115	-1.13426	0.100403	-11.297	1.3581e-29	2.21794e-28	10.7097	10.7279	11.0346	10.7221	10.068	10.1106	10.0935	10.0432
ENSG00000127526.15 SLC35E1	2310.87	-0.550265	0.0487116	-11.2964	1.36723e-29	2.2314e-28	11.7388	11.712	11.653	11.6806	11.2605	11.3024	11.2366	11.2147
ENSG00000078124.13 ACER3	1037.88	1.29569	0.114713	11.295	1.38826e-29	2.26427e-28	9.94442	10.1246	10.1046	10.3263	10.8721	10.9872	11.1091	10.9754
ENSG00000177700.6 POLR2L	905.132	0.987345	0.0874233	11.2938	1.4075e-29	2.29416e-28	10.1223	10.1996	10.1457	10.0848	10.8739	10.8421	10.624	10.7539
ENSG00000105063.19 PPP6R1	5399.02	-0.48304	0.0427712	-11.2936	1.41181e-29	2.2997e-28	12.7792	12.7802	12.7433	12.6891	12.3449	12.3388	12.2706	12.2978
ENSG00000135709.12 KIAA0513	240.394	-1.27053	0.11256	-11.2876	1.51098e-29	2.45965e-28	9.72307	9.74366	9.70094	9.64421	9.17791	9.17521	9.23899	9.20516
ENSG00000132256.19 TRIM5	685.817	-0.916375	0.0812301	-11.2812	1.6248e-29	2.64323e-28	10.3894	10.4778	10.4957	10.5801	9.94386	9.91382	9.92368	9.99069
ENSG00000023171.18 GRAMD1B	20252.7	0.48838	0.043292	11.2811	1.62741e-29	2.64577e-28	14.0743	14.1053	14.0209	14.1609	14.5036	14.5763	14.5825	14.5978
ENSG00000181444.13 ZNF467	1080.4	0.669449	0.0593638	11.277	1.70366e-29	2.76796e-28	10.4452	10.4348	10.4176	10.3762	10.9132	10.9034	10.8444	10.8477
ENSG00000108784.10 NAGLU	1300.63	0.814065	0.0722073	11.274	1.76375e-29	2.86374e-28	10.4893	10.6091	10.5718	10.4635	11.2157	11.1228	11.0485	11.0713
ENSG00000164081.13 TEX264	1126.19	-0.730239	0.0648014	-11.2689	1.86943e-29	3.03338e-28	11.0016	10.9257	10.9746	10.8436	10.4079	10.4374	10.4511	10.4373
ENSG00000155265.11 GOLGA7B	116.043	2.03282	0.180507	11.2618	2.02672e-29	3.28649e-28	8.78174	8.76814	8.81955	8.79224	9.30072	9.43141	9.25322	9.37159
ENSG00000240445.6 FOXO3B	303.049	-1.27561	0.11327	-11.2617	2.0289e-29	3.28791e-28	9.8711	9.86243	9.81062	9.92652	9.31108	9.28097	9.39821	9.2519
ENSG00000123136.15 DDX39A	1833.08	-0.758145	0.0673632	-11.2546	2.19834e-29	3.56021e-28	11.5357	11.4894	11.5439	11.3777	10.96	10.9266	10.8043	10.9266
ENSG00000167535.8 CACNB3	2098.47	-0.59159	0.0525652	-11.2544	2.20286e-29	3.56525e-28	11.6407	11.5895	11.6003	11.5511	11.1938	11.0957	11.135	11.0787
ENSG00000267761.3 MIR4527HG	58.4744	3.36528	0.299129	11.2503	2.30936e-29	3.73521e-28	8.45594	8.52849	8.4588	8.53963	9.09808	9.15237	9.01679	9.04648
ENSG00000129990.15 SYT5	159.54	-1.51116	0.134335	-11.2492	2.336e-29	3.77589e-28	9.51886	9.45912	9.46324	9.44449	8.97323	9.01606	8.96326	8.98125
ENSG00000150764.14 DIXDC1	467.073	-1.13338	0.100773	-11.2468	2.40143e-29	3.87917e-28	10.1496	10.1205	10.1389	10.3239	9.58704	9.66686	9.56871	9.59608
ENSG00000105204.14 DYRK1B	117.699	-1.91722	0.170578	-11.2396	2.60685e-29	4.2083e-28	9.36032	9.41927	9.30338	9.2711	8.84605	8.78611	8.80793	8.81202
ENSG00000178307.10 TMEM11	921.941	-0.811777	0.0722393	-11.2373	2.67333e-29	4.31286e-28	10.7584	10.7634	10.8292	10.6516	10.2683	10.1686	10.228	10.2219
ENSG00000143702.16 CEP170	5995.52	-0.676483	0.0602113	-11.2352	2.74003e-29	4.41764e-28	12.8942	12.9004	12.9267	13.1077	12.3069	12.2871	12.4001	12.3777
ENSG00000118785.14 SPP1	2678.12	-1.17934	0.105046	-11.2268	3.01062e-29	4.8508e-28	11.9705	11.9877	12.1123	12.1951	10.9087	10.9948	11.1099	11.3575
ENSG00000125046.15 SSUH2	456.821	-1.15922	0.103273	-11.2248	3.08116e-29	4.9613e-28	10.1667	10.1764	10.2113	10.145	9.4393	9.57067	9.65391	9.63528
ENSG00000168610.16 STAT3	5052.77	0.409164	0.0364654	11.2206	3.23046e-29	5.19839e-28	12.2488	12.2723	12.2857	12.2572	12.652	12.6097	12.6505	12.6184
ENSG00000105246.6 EBI3	77.1325	2.6585	0.237042	11.2153	3.42969e-29	5.51546e-28	8.6102	8.62546	8.61226	8.60816	9.217	9.08976	9.11566	9.26881
ENSG00000099282.10 TSPAN15	265.953	1.50634	0.134352	11.2119	3.56397e-29	5.72776e-28	9.10819	9.15986	9.28134	9.21892	9.87361	9.85113	9.69218	9.78952
ENSG00000204524.7 ZNF805	426.325	-1.27193	0.113452	-11.2112	3.5931e-29	5.7709e-28	10.0982	10.1594	10.0049	10.2646	9.47178	9.50657	9.58028	9.45519
ENSG00000155463.14 OXA1L	5678.64	0.575735	0.0513701	11.2076	3.74284e-29	6.00757e-28	12.3435	12.3197	12.4047	12.2424	12.9041	12.8623	12.7757	12.8578
ENSG00000113369.9 ARRDC3	7319.32	0.596529	0.0532534	11.2017	4.00011e-29	6.41644e-28	12.591	12.6783	12.623	12.6957	13.0963	13.1714	13.2902	13.2299
ENSG00000181458.10 TMEM45A	576.461	0.835681	0.074651	11.1945	4.33812e-29	6.95421e-28	9.80765	9.81428	9.85855	9.88263	10.2929	10.3436	10.3222	10.2792
ENSG00000102595.20 UGGT2	1015.75	1.12226	0.100256	11.194	4.36393e-29	6.99116e-28	10.0094	10.2149	10.1608	10.3332	10.8374	10.9115	10.9997	10.9539
ENSG00000167106.12 FAM102A	313.067	-1.10338	0.0985893	-11.1917	4.4776e-29	7.1687e-28	9.85556	9.87915	9.85213	9.86595	9.39322	9.41773	9.38956	9.30436
ENSG00000149679.11 CABLES2	633.291	1.14835	0.102614	11.191	4.51331e-29	7.22129e-28	9.81901	9.75482	9.82389	9.81443	10.6203	10.5101	10.3639	10.3362
ENSG00000163288.14 GABRB1	66.8985	-5.9889	0.535171	-11.1906	4.53262e-29	7.2476e-28	9.12473	9.12872	9.07623	9.33439	8.32322	8.23316	8.38248	8.37046
ENSG00000140943.17 MBTPS1	4459.36	0.568179	0.0507759	11.1899	4.56741e-29	7.29861e-28	12.0165	12.0176	12.0024	12.0674	12.6358	12.5189	12.4749	12.4846
ENSG00000150471.16 ADGRL3	81.2055	3.42587	0.306163	11.1897	4.57987e-29	7.31389e-28	8.44157	8.52849	8.47683	8.66577	9.23962	9.33134	9.18181	9.14606
ENSG00000189077.11 TMEM120A	635.078	-1.0112	0.0903787	-11.1885	4.64182e-29	7.40814e-28	10.4364	10.4391	10.5436	10.3205	9.79026	9.83258	9.86388	9.91639
ENSG00000002822.16 MAD1L1	1589.59	-0.792563	0.0708469	-11.187	4.72259e-29	7.53228e-28	11.4242	11.3472	11.3718	11.1812	10.7721	10.7656	10.7048	10.727
ENSG00000115255.12 REEP6	1516.5	0.630939	0.0564147	11.184	4.88622e-29	7.78834e-28	10.7722	10.7766	10.807	10.6996	11.2841	11.2384	11.1904	11.2186
ENSG00000166579.16 NDEL1	1745.71	-0.611326	0.0546847	-11.1791	5.16164e-29	8.22214e-28	11.4389	11.4097	11.3946	11.3019	10.9293	10.8932	10.9267	10.9259
ENSG00000261824.7 LINC00662	132.644	-1.78778	0.15993	-11.1785	5.19618e-29	8.27195e-28	9.44391	9.40131	9.28875	9.43202	8.87733	8.87496	8.84805	8.8863
ENSG00000217801.10 AL390719.1	678.865	0.964134	0.0863342	11.1675	5.88341e-29	9.36007e-28	10.0053	9.88578	9.95089	9.8284	10.417	10.5263	10.4656	10.5404
ENSG00000261740.6 BOLA2-SMG1P6	833.782	-0.856037	0.0766682	-11.1655	6.01653e-29	9.56583e-28	10.5927	10.664	10.6518	10.7384	10.0984	10.1216	10.197	10.0594
ENSG00000164761.9 TNFRSF11B	221.288	1.70687	0.152934	11.1609	6.33775e-29	1.00702e-27	8.98495	9.0852	9.01671	9.17676	9.64025	9.61417	9.77586	9.75895
ENSG00000253882.6 AC099548.2	355.876	1.69106	0.151526	11.1602	6.38548e-29	1.01397e-27	9.46878	9.18658	9.24721	9.21575	10.0263	10.1721	9.99169	10.0033
ENSG00000089775.12 ZBTB25	775.346	0.773799	0.0693445	11.1588	6.48855e-29	1.02969e-27	10.0698	10.079	10.0385	10.1714	10.5807	10.579	10.5588	10.5659
ENSG00000106665.16 CLIP2	2188.96	-0.55255	0.049518	-11.1586	6.50311e-29	1.03135e-27	11.637	11.5927	11.6049	11.6935	11.2186	11.2102	11.1778	11.1598
ENSG00000204767.4 INSYN2B	172.256	1.53542	0.137679	11.1522	6.98705e-29	1.1074e-27	8.94422	9.03905	9.01671	9.01903	9.58704	9.50342	9.47757	9.51301
ENSG00000136630.13 HLX	243.293	-1.39967	0.125543	-11.1489	7.24783e-29	1.14801e-27	9.80765	9.73617	9.71555	9.65032	9.217	9.07967	9.19486	9.20516
ENSG00000180957.18 PITPNB	1908.77	-0.63566	0.0570493	-11.1423	7.80815e-29	1.23599e-27	11.4427	11.5012	11.5049	11.5473	10.9635	10.9679	11.0844	10.9873
ENSG00000147592.9 LACTB2	88.184	-2.47178	0.221868	-11.1407	7.94613e-29	1.25704e-27	9.25467	9.23138	9.15762	9.27704	8.6142	8.6789	8.73502	8.59561
ENSG00000245910.8 SNHG6	2772.64	-0.795593	0.0714187	-11.1398	8.02557e-29	1.26881e-27	12.0522	11.9772	12.032	11.9413	11.2157	11.2739	11.366	11.4885
ENSG00000170801.10 HTRA3	437.087	-0.916388	0.0822778	-11.1377	8.21966e-29	1.29869e-27	10.046	10.0916	10.1253	10.096	9.65009	9.61984	9.60023	9.63336
ENSG00000187498.16 COL4A1	10304.5	0.764482	0.0686491	11.1361	8.37234e-29	1.32198e-27	12.9411	12.9519	12.9569	13.1621	13.8748	13.7117	13.6297	13.6841
ENSG00000223745.8 CCDC18-AS1	507.409	0.926901	0.0832535	11.1335	8.61968e-29	1.36018e-27	9.70178	9.76586	9.75126	9.66847	10.2698	10.1561	10.2113	10.2289
ENSG00000086102.19 NFX1	1769.97	-0.629222	0.0565201	-11.1327	8.69417e-29	1.37108e-27	11.4233	11.3716	11.4907	11.3436	10.9565	10.9355	10.8984	10.9127
ENSG00000139926.16 FRMD6	5188.88	-0.526186	0.0472728	-11.1308	8.87851e-29	1.39928e-27	12.6667	12.6947	12.7014	12.7847	12.2846	12.2163	12.1826	12.2736
ENSG00000163466.16 ARPC2	6714.3	-0.430637	0.0386994	-11.1277	9.19446e-29	1.44817e-27	13.0176	12.9872	13.0783	12.9907	12.6374	12.621	12.6028	12.6294
ENSG00000170786.13 SDR16C5	215.294	1.4083	0.126604	11.1237	9.62427e-29	1.51492e-27	9.13449	9.13923	9.12248	9.0964	9.55272	9.62548	9.71782	9.68053
ENSG00000197050.11 ZNF420	47.0268	-4.25534	0.382633	-11.1212	9.89305e-29	1.55626e-27	9.00827	9.07013	8.96303	8.99411	8.41319	8.42384	8.42199	8.39168
ENSG00000243927.6 MRPS6	5878.97	-0.62863	0.0565447	-11.1174	1.03242e-28	1.62308e-27	12.9912	12.8378	12.9942	12.8327	12.4072	12.3269	12.2888	12.355
ENSG00000112715.25 VEGFA	28030.6	0.552577	0.0497192	11.114	1.07275e-28	1.68543e-27	14.5576	14.5538	14.5235	14.3973	15.1158	15.0806	15.0018	15.0002
ENSG00000099204.20 ABLIM1	290.906	1.40235	0.12618	11.1139	1.07362e-28	1.68574e-27	9.19071	9.25293	9.19543	9.39364	9.82432	9.84883	9.89362	9.8531
ENSG00000258947.8 TUBB3	5463.96	0.561946	0.0505643	11.1135	1.07868e-28	1.69264e-27	12.3016	12.2363	12.3681	12.2366	12.8537	12.8245	12.7487	12.7479
ENSG00000138613.14 APH1B	507.222	1.02505	0.0922462	11.1121	1.09497e-28	1.71712e-27	9.60839	9.66832	9.67866	9.79852	10.2727	10.2425	10.2197	10.2136
ENSG00000145649.8 GZMA	203.252	-1.76902	0.1592	-11.1119	1.09809e-28	1.72095e-27	9.65609	9.58092	9.69849	9.65235	9.11987	9.02158	8.89541	9.05014
ENSG00000133103.17 COG6	1441.49	-0.734693	0.0661387	-11.1084	1.1422e-28	1.78897e-27	11.2028	11.2108	11.2669	11.1507	10.5599	10.6616	10.7214	10.7206
ENSG00000157617.17 C2CD2	3300.68	-0.544845	0.0490485	-11.1083	1.14327e-28	1.78954e-27	12.1267	12.1169	12.0917	12.2043	11.6081	11.6742	11.7158	11.6782
ENSG00000078674.18 PCM1	2100.79	-0.691781	0.062283	-11.1071	1.15909e-28	1.81318e-27	11.5697	11.6087	11.5771	11.7554	11.0886	11.0526	11.1274	11.0531
ENSG00000033100.16 CHPF2	876.926	0.809154	0.0728858	11.1017	1.23108e-28	1.9246e-27	10.1642	10.2411	10.1674	10.1477	10.7929	10.6857	10.6921	10.6275
ENSG00000100027.17 YPEL1	352.886	-0.971907	0.0875571	-11.1003	1.25067e-28	1.95401e-27	9.93276	9.91513	9.93098	9.94552	9.48333	9.47783	9.45993	9.49337
ENSG00000068615.19 REEP1	195.598	1.33965	0.120725	11.0967	1.30107e-28	2.0315e-27	9.09129	9.07393	9.08571	9.13234	9.57397	9.53759	9.58315	9.60996
ENSG00000149100.13 EIF3M	4791.02	-0.45721	0.0412026	-11.0966	1.30277e-28	2.03289e-27	12.5517	12.5447	12.6038	12.6274	12.1647	12.1428	12.1972	12.1876
ENSG00000016391.11 CHDH	130.954	1.77058	0.159594	11.0942	1.3382e-28	2.08689e-27	8.90081	8.84264	8.85376	8.87403	9.46595	9.31229	9.37379	9.38644
ENSG00000164099.3 PRSS12	476.497	0.884485	0.0797324	11.0932	1.35404e-28	2.109e-27	9.65609	9.72862	9.67615	9.70581	10.1281	10.1844	10.1695	10.1395
ENSG00000175573.7 C11orf68	3198.08	-0.859109	0.0774445	-11.0932	1.35322e-28	2.109e-27	12.2637	12.2689	12.2341	12.0169	11.5704	11.5326	11.3538	11.4296
ENSG00000235245.1 AL360181.2	148.711	1.93919	0.174885	11.0884	1.42844e-28	2.22351e-27	8.90529	8.90373	8.89235	8.80958	9.60762	9.47783	9.41528	9.37408
ENSG00000132205.11 EMILIN2	3924.68	0.479738	0.0432849	11.0833	1.51251e-28	2.35291e-27	11.8813	11.8928	11.9672	11.909	12.3495	12.3585	12.2856	12.3332
ENSG00000105993.15 DNAJB6	3288.08	0.525689	0.0474445	11.0801	1.56723e-28	2.43654e-27	11.7009	11.611	11.6881	11.6982	12.1739	12.071	12.1088	12.1381
ENSG00000075539.15 FRYL	1952.79	-0.782026	0.0705854	-11.0791	1.58382e-28	2.46083e-27	11.4827	11.5733	11.5018	11.7139	10.8932	10.9718	11.0163	10.9552
ENSG00000274211.6 SOCS7	1745.16	-0.716706	0.0647239	-11.0733	1.69103e-28	2.62578e-27	11.3894	11.462	11.3087	11.5093	10.8153	10.8819	10.9074	10.8802
ENSG00000085511.20 MAP3K4	1610.7	-0.581389	0.0525166	-11.0706	1.74266e-28	2.70429e-27	11.2609	11.2806	11.2994	11.3019	10.8877	10.8389	10.8737	10.7887
ENSG00000100410.8 PHF5A	932.929	-0.738892	0.0668065	-11.0602	1.95688e-28	3.03485e-27	10.7522	10.7296	10.7978	10.7014	10.2056	10.2375	10.2656	10.3265
ENSG00000126458.4 RRAS	3944.35	-0.746482	0.067497	-11.0595	1.97222e-28	3.05677e-27	12.4852	12.4548	12.5308	12.243	11.8328	11.7484	11.759	11.787
ENSG00000248508.8 SRP14-AS1	228.472	1.43171	0.129506	11.0552	2.06857e-28	3.20412e-27	9.14413	9.20607	9.10889	9.10372	9.61017	9.77999	9.71909	9.64104
ENSG00000161179.14 YDJC	1316.12	-0.765557	0.0692639	-11.0528	2.12567e-28	3.29056e-27	11.1211	11.1122	11.2201	10.998	10.591	10.5803	10.523	10.574
ENSG00000186522.15 SEPTIN10	3663.07	-0.583285	0.052775	-11.0523	2.13667e-28	3.30555e-27	12.2397	12.2407	12.3216	12.3236	11.7377	11.6992	11.8313	11.829
ENSG00000140450.9 ARRDC4	780.844	-0.955796	0.0864836	-11.0518	2.14949e-28	3.32335e-27	10.5338	10.6559	10.5802	10.7127	9.96453	9.96503	10.0981	10.0819
ENSG00000109606.13 DHX15	5618.63	-0.431446	0.0390561	-11.0468	2.27064e-28	3.50851e-27	12.7998	12.753	12.8278	12.7451	12.3705	12.3975	12.385	12.4085
ENSG00000113240.13 CLK4	1148.11	0.739269	0.0669665	11.0394	2.4674e-28	3.81021e-27	10.4713	10.423	10.475	10.4232	11.0187	10.967	10.9973	10.8521
ENSG00000064419.13 TNPO3	2702	-0.476804	0.0431941	-11.0386	2.48785e-28	3.83944e-27	11.883	11.8379	11.8818	11.8432	11.4829	11.4845	11.468	11.43
ENSG00000171681.12 ATF7IP	2143.34	-0.899329	0.0814716	-11.0386	2.49011e-28	3.84058e-27	11.659	11.7511	11.587	11.8569	10.8813	10.9901	11.1159	11.0154
ENSG00000140992.19 PDPK1	1414.15	-0.617497	0.0559405	-11.0385	2.49255e-28	3.84199e-27	11.1068	11.1944	11.1036	11.1971	10.7005	10.6821	10.6979	10.7189
ENSG00000003137.9 CYP26B1	94.5636	2.5921	0.234921	11.034	2.62084e-28	4.03728e-27	8.58488	8.5707	8.76777	8.70949	9.23215	9.30844	9.23488	9.29628
ENSG00000165617.15 DACT1	2029.24	-0.657113	0.0595709	-11.0308	2.71532e-28	4.18027e-27	11.5628	11.5946	11.5741	11.5829	10.9799	10.9958	11.1493	11.0984
ENSG00000166831.9 RBPMS2	816.055	0.726228	0.0658639	11.0262	2.85691e-28	4.39557e-27	10.1046	10.1945	10.1773	10.1302	10.5726	10.6122	10.6344	10.6102
ENSG00000135299.17 ANKRD6	168.122	1.48401	0.134596	11.0257	2.87395e-28	4.4191e-27	9.02713	9.01485	8.92866	9.0431	9.52827	9.47133	9.50267	9.50433
ENSG00000103365.15 GGA2	3453.73	-0.528361	0.0479538	-11.0181	3.12489e-28	4.80202e-27	12.1812	12.2112	12.2452	12.1051	11.7634	11.7221	11.7091	11.736
ENSG00000084693.16 AGBL5	1257.68	0.623001	0.0565507	11.0167	3.17523e-28	4.87641e-27	10.552	10.5988	10.6041	10.5734	11.0838	10.9881	10.9997	11.0251
ENSG00000088899.15 LZTS3	800.728	-0.734326	0.0667018	-11.0091	3.45491e-28	5.3027e-27	10.591	10.6194	10.6253	10.5325	10.0917	10.1489	10.1582	10.1257
ENSG00000127990.19 SGCE	652.421	-0.813411	0.0739101	-11.0054	3.59899e-28	5.52049e-27	10.4325	10.376	10.4802	10.374	9.94386	9.96921	9.90121	9.95193
ENSG00000153283.13 CD96	192.937	1.8253	0.165871	11.0043	3.64224e-28	5.58345e-27	8.91853	8.99403	9.10889	8.93222	9.73265	9.64499	9.54369	9.55121
ENSG00000176973.8 FAM89B	1472.79	-0.750574	0.0682459	-10.9981	3.90388e-28	5.9809e-27	11.1994	11.2047	11.3758	11.1551	10.6577	10.7035	10.6915	10.679
ENSG00000234745.13 HLA-B	7712.51	-0.547721	0.0498061	-10.9971	3.94734e-28	6.04381e-27	13.2865	13.2146	13.3344	13.1638	12.7838	12.7594	12.6897	12.7375
ENSG00000175294.6 CATSPER1	117.709	1.75144	0.159269	10.9967	3.96155e-28	6.06189e-27	8.8394	8.86371	8.83348	8.81524	9.34149	9.36102	9.28683	9.32032
ENSG00000196363.10 WDR5	1339.65	-0.613645	0.0558267	-10.992	4.17723e-28	6.38805e-27	11.1145	11.0946	11.1003	11.0476	10.691	10.6653	10.5993	10.6395
ENSG00000173327.8 MAP3K11	1717.52	-0.538854	0.0490348	-10.9892	4.30585e-28	6.58076e-27	11.3406	11.3656	11.3533	11.3193	10.9747	10.9336	10.9271	10.9001
ENSG00000100417.12 PMM1	750.525	-0.936188	0.0852002	-10.9881	4.36033e-28	6.65999e-27	10.6382	10.5636	10.638	10.4603	10.0901	9.998	9.94886	9.9921
ENSG00000231863.2 AL139393.1	64.6661	2.73198	0.248684	10.9857	4.47628e-28	6.83295e-27	8.59352	8.59913	8.52426	8.57074	9.14526	9.03249	9.13678	9.08926
ENSG00000128928.10 IVD	2013.91	0.583758	0.0531455	10.9841	4.556e-28	6.95045e-27	11.0574	11.1283	11.1345	11.0161	11.5737	11.5462	11.5106	11.5472
ENSG00000076641.4 PAG1	260.425	1.22531	0.11156	10.9834	4.59388e-28	7.00401e-27	9.26304	9.27397	9.17884	9.27704	9.712	9.81136	9.7674	9.71328
ENSG00000101544.9 ADNP2	1414.8	-0.59074	0.0538123	-10.9778	4.88815e-28	7.44816e-27	11.1222	11.1251	11.1183	11.205	10.7005	10.7372	10.7008	10.7101
ENSG00000286069.2 AC076968.2	53.8375	5.11852	0.466309	10.9767	4.94809e-28	7.53495e-27	8.34463	8.23316	8.32535	8.47905	9.04309	9.11927	9.06405	9.06101
ENSG00000005100.13 DHX33	2205.42	-0.555537	0.0506125	-10.9763	4.96946e-28	7.56292e-27	11.6105	11.6308	11.6147	11.716	11.1887	11.1638	11.2311	11.2046
ENSG00000164318.18 EGFLAM	283.537	1.15555	0.105281	10.9758	4.99359e-28	7.59507e-27	9.26025	9.29452	9.37664	9.30903	9.79242	9.84421	9.76861	9.79287
ENSG00000092199.18 HNRNPC	17152.4	-0.51065	0.0465405	-10.9722	5.20153e-28	7.90658e-27	14.3543	14.2976	14.4251	14.2837	13.883	13.7744	13.8484	13.8821
ENSG00000206503.13 HLA-A	10779.2	-0.596626	0.0543933	-10.9687	5.40224e-28	8.20672e-27	13.793	13.7167	13.801	13.5933	13.2149	13.1211	13.1367	13.1784
ENSG00000151651.16 ADAM8	3514.71	-1.05588	0.0962831	-10.9664	5.54067e-28	8.41196e-27	12.4464	12.3831	12.4096	12.2738	11.6596	11.6156	11.3258	11.2762
ENSG00000115828.17 QPCT	1598.01	0.898002	0.081888	10.9662	5.55483e-28	8.42838e-27	10.5716	10.6175	10.7316	10.8624	11.3375	11.368	11.3714	11.4028
ENSG00000179862.7 CITED4	1616.47	-1.0092	0.0920307	-10.9659	5.57242e-28	8.44999e-27	11.3289	11.4081	11.6164	11.2826	10.5668	10.6147	10.7579	10.6889
ENSG00000169967.16 MAP3K2	1376.95	-1.03243	0.0941671	-10.9638	5.70413e-28	8.64453e-27	11.1434	11.2482	11.1599	11.3878	10.3612	10.446	10.6338	10.5173
ENSG00000168813.17 ZNF507	1402.02	-0.723013	0.0659642	-10.9607	5.90535e-28	8.94411e-27	11.1786	11.1473	11.1504	11.22	10.5715	10.5854	10.7356	10.679
ENSG00000136891.14 TEX10	1329.47	-0.634469	0.0578894	-10.96	5.94897e-28	9.00477e-27	11.0654	11.1031	11.1052	11.0844	10.6501	10.5424	10.6603	10.6631
ENSG00000182670.13 TTC3	8452.94	-0.521573	0.0475945	-10.9587	6.03735e-28	9.13308e-27	13.3343	13.3585	13.328	13.4416	12.8387	12.8397	12.9617	12.8693
ENSG00000119535.18 CSF3R	51.7634	4.21415	0.384581	10.9578	6.09772e-28	9.21888e-27	8.40934	8.49228	8.39279	8.37524	9.06649	9.08473	8.94545	9.0823
ENSG00000121440.15 PDZRN3	277.04	-1.07561	0.0981802	-10.9555	6.25225e-28	9.44684e-27	9.79123	9.78042	9.75126	9.76051	9.31451	9.3351	9.31549	9.30971
ENSG00000091542.9 ALKBH5	5619.86	-0.469868	0.0428901	-10.9552	6.27717e-28	9.47883e-27	12.7833	12.7772	12.8661	12.7604	12.3298	12.3585	12.3975	12.3949
ENSG00000144893.12 MED12L	1297.48	0.781125	0.0713411	10.9492	6.70703e-28	1.01219e-26	10.5582	10.5529	10.4299	10.6362	11.0751	11.1045	11.1741	11.0607
ENSG00000136997.21 MYC	222.742	-1.2641	0.115466	-10.9478	6.80456e-28	1.02629e-26	9.68555	9.65018	9.59553	9.66646	9.22081	9.13835	9.16633	9.14928
ENSG00000152315.5 KCNK13	268.752	1.23973	0.113288	10.9432	7.16055e-28	1.07934e-26	9.25186	9.20927	9.30701	9.28	9.84511	9.79216	9.75521	9.70247
ENSG00000095752.7 IL11	4491.59	0.524595	0.047959	10.9384	7.55099e-28	1.13751e-26	12.0574	12.0355	12.1508	11.9855	12.5253	12.5082	12.5148	12.5422
ENSG00000275835.5 TUBGCP5	804.346	0.749305	0.0685628	10.9287	8.40062e-28	1.26475e-26	10.1942	10.1395	10.0959	10.0848	10.6392	10.602	10.569	10.5926
ENSG00000198898.14 CAPZA2	3140.53	-0.570608	0.0522337	-10.9241	8.83905e-28	1.32997e-26	12.0215	12.0503	12.0912	12.1622	11.5743	11.5678	11.6595	11.5852
ENSG00000159840.16 ZYX	10258.3	0.505545	0.046284	10.9227	8.98021e-28	1.3504e-26	13.2093	13.1485	13.1632	13.0625	13.6851	13.6351	13.5937	13.5836
ENSG00000113231.14 PDE8B	286.921	1.25651	0.11505	10.9214	9.10595e-28	1.36849e-26	9.25747	9.34533	9.24334	9.30903	9.92283	9.81611	9.75888	9.79621
ENSG00000285634.2 AL583827.1	91.5323	-2.17501	0.199211	-10.9181	9.44207e-28	1.41816e-26	9.22907	9.29742	9.21972	9.18008	8.69053	8.64762	8.70812	8.77366
ENSG00000141576.16 RNF157	654.712	0.848201	0.0777016	10.9161	9.65117e-28	1.44871e-26	9.90308	9.93431	9.92494	9.95802	10.4428	10.4882	10.3352	10.4462
ENSG00000126947.13 ARMCX1	440.125	-1.07531	0.0985484	-10.9115	1.0155e-27	1.52343e-26	10.1122	10.0944	10.1236	10.1818	9.50605	9.51285	9.62396	9.66752
ENSG00000157851.17 DPYSL5	703.401	0.80172	0.073501	10.9076	1.06014e-27	1.58945e-26	9.99834	10.052	9.98014	9.975	10.5256	10.5357	10.4363	10.4413
ENSG00000104381.14 GDAP1	108.627	2.1522	0.197416	10.9019	1.12914e-27	1.6919e-26	8.7169	8.74292	8.70128	8.84271	9.37735	9.35	9.30604	9.22299
ENSG00000165312.7 OTUD1	503.622	-0.915942	0.0840759	-10.8942	1.22803e-27	1.83898e-26	10.1907	10.2324	10.1806	10.2388	9.69096	9.67226	9.79377	9.70789
ENSG00000035862.12 TIMP2	1889.28	0.714358	0.0655795	10.893	1.24459e-27	1.86268e-26	10.9348	11.0047	10.856	11.0189	11.5899	11.5417	11.4432	11.468
ENSG00000107175.12 CREB3	887.181	-0.88201	0.0809823	-10.8914	1.26689e-27	1.89493e-26	10.7806	10.7432	10.7855	10.6037	10.2009	10.1143	10.11	10.2254
ENSG00000065328.17 MCM10	266.746	1.25609	0.115342	10.8901	1.28478e-27	1.92055e-26	9.22907	9.20607	9.23161	9.34544	9.80955	9.74016	9.73792	9.79953
ENSG00000107625.14 DDX50	2357.47	-0.613838	0.0563834	-10.8869	1.33157e-27	1.98931e-26	11.7866	11.6743	11.8026	11.7059	11.2179	11.1946	11.2502	11.3127
ENSG00000146858.8 ZC3HAV1L	353.117	1.00119	0.0920519	10.8763	1.49477e-27	2.23182e-26	9.4231	9.49744	9.49942	9.46169	9.91897	9.97957	9.93214	9.91639
ENSG00000144567.11 RETREG2	3199.51	-0.480959	0.0442308	-10.8738	1.53589e-27	2.29186e-26	12.094	12.0389	12.0978	12.0585	11.6935	11.683	11.6117	11.6693
ENSG00000166402.9 TUB	879.791	-0.681929	0.0627168	-10.8732	1.54752e-27	2.30784e-26	10.6814	10.6959	10.6218	10.6794	10.2086	10.2803	10.2222	10.2184
ENSG00000100354.21 TNRC6B	1570.77	-0.911186	0.0838048	-10.8727	1.55503e-27	2.31767e-26	11.3284	11.3218	11.2126	11.5349	10.6664	10.6928	10.7401	10.6049
ENSG00000171310.11 CHST11	3881.65	0.516081	0.0474725	10.8712	1.5816e-27	2.35588e-26	11.8274	11.8688	11.8738	11.9538	12.2791	12.3299	12.3653	12.3477
ENSG00000100056.12 ESS2	673.606	-0.756714	0.0696191	-10.8693	1.61357e-27	2.40208e-26	10.4808	10.3805	10.4473	10.4211	9.97749	9.998	9.97352	9.9921
ENSG00000197150.13 ABCB8	331.109	1.09705	0.100946	10.8676	1.64384e-27	2.44571e-26	9.37518	9.44437	9.40637	9.40402	9.9885	9.89403	9.89144	9.84194
ENSG00000165280.18 VCP	15126.7	-0.533428	0.049091	-10.8661	1.67187e-27	2.48594e-26	14.195	14.1776	14.2422	14.0773	13.7222	13.6636	13.585	13.6719
ENSG00000079819.19 EPB41L2	4400.28	-0.457142	0.0421047	-10.8573	1.84201e-27	2.73732e-26	12.4538	12.447	12.5069	12.4785	12.0438	12.036	12.1223	12.0591
ENSG00000141034.10 GID4	1211.82	-0.776054	0.0714787	-10.8571	1.84445e-27	2.73934e-26	11.0106	10.9751	11.1077	11.0196	10.3787	10.537	10.5472	10.4609
ENSG00000170222.12 ADPRM	318.804	-1.26691	0.116737	-10.8528	1.93511e-27	2.87229e-26	9.94877	9.87249	9.93699	9.85752	9.21317	9.36102	9.36135	9.41786
ENSG00000185904.12 LINC00839	300.604	-1.05547	0.0972858	-10.8492	2.01182e-27	2.98439e-26	9.80111	9.87583	9.82169	9.80385	9.36771	9.37552	9.3451	9.37905
ENSG00000243989.9 ACY1	1292.93	0.672311	0.0620062	10.8427	2.16115e-27	3.20404e-26	10.5547	10.5645	10.68	10.5531	11.1075	11.0698	11.0204	11.0762
ENSG00000168546.11 GFRA2	56.8956	3.0055	0.277332	10.8372	2.29372e-27	3.39858e-26	8.53794	8.51694	8.52426	8.52852	9.14108	9.04855	9.0222	9.01653
ENSG00000185947.15 ZNF267	462.955	-1.28349	0.118496	-10.8315	2.44218e-27	3.61643e-26	10.1385	10.1803	10.1184	10.3762	9.45124	9.53759	9.62809	9.57592
ENSG00000133789.15 SWAP70	2138.58	-0.565799	0.0522373	-10.8313	2.44613e-27	3.62016e-26	11.5822	11.5593	11.6187	11.6785	11.1153	11.1655	11.1952	11.1563
ENSG00000131828.14 PDHA1	1463.27	-0.54202	0.0500454	-10.8306	2.46585e-27	3.6472e-26	11.1723	11.1617	11.1818	11.1457	10.7771	10.7656	10.7378	10.7848
ENSG00000153487.13 ING1	1048.74	-0.710103	0.0655726	-10.8293	2.50155e-27	3.69785e-26	10.8458	10.8363	10.9156	10.835	10.3043	10.3467	10.42	10.4224
ENSG00000170485.17 NPAS2	3343.25	0.451819	0.04173	10.8272	2.55865e-27	3.78004e-26	11.7308	11.7358	11.7345	11.7202	12.1381	12.1596	12.0909	12.0824
ENSG00000142089.17 IFITM3	10975.5	0.627799	0.0579843	10.827	2.56281e-27	3.78397e-26	13.2179	13.1704	13.2246	13.0604	13.8055	13.8675	13.683	13.6966
ENSG00000025796.14 SEC63	3347.74	-0.692038	0.0639243	-10.8259	2.5951e-27	3.82941e-26	12.1475	12.1545	12.1853	12.3238	11.513	11.6003	11.7021	11.6277
ENSG00000116791.14 CRYZ	356.32	1.19529	0.110535	10.8136	2.96637e-27	4.37214e-26	9.31951	9.38828	9.46936	9.50693	9.95892	10.036	9.94886	9.9621
ENSG00000112320.12 SOBP	514.871	0.867533	0.0802257	10.8137	2.96592e-27	4.37214e-26	9.77289	9.73992	9.71555	9.76418	10.2756	10.2408	10.1739	10.1838
ENSG00000103241.7 FOXF1	987.458	0.645217	0.059681	10.8111	3.05006e-27	4.49288e-26	10.3386	10.3307	10.3761	10.3481	10.7327	10.7622	10.8107	10.7978
ENSG00000146701.12 MDH2	6680.98	-0.514972	0.0476353	-10.8107	3.06203e-27	4.50788e-26	13.0781	13.0155	13.1015	12.9812	12.6167	12.569	12.4997	12.5999
ENSG00000159314.11 ARHGAP27	277.724	1.14326	0.105774	10.8085	3.13725e-27	4.61593e-26	9.29841	9.30606	9.34247	9.26812	9.83476	9.71712	9.80673	9.76923
ENSG00000117593.12 DARS2	1328.8	0.578569	0.0535319	10.8079	3.15711e-27	4.64244e-26	10.6135	10.646	10.6552	10.7005	11.087	11.0662	11.0592	11.0719
ENSG00000116584.20 ARHGEF2	1993.75	0.603293	0.0558256	10.8067	3.19829e-27	4.70025e-26	11.0929	11.1025	11.0534	11.0064	11.6217	11.5209	11.494	11.5186
ENSG00000028528.15 SNX1	2664.15	0.501997	0.0464873	10.7986	3.49575e-27	5.13442e-26	11.4959	11.4299	11.4191	11.4052	11.8624	11.8147	11.8535	11.8824
ENSG00000010310.9 GIPR	174.993	1.4753	0.136679	10.7939	3.67729e-27	5.39791e-26	9.04914	8.99825	9.0618	8.98132	9.60251	9.50972	9.49957	9.48006
ENSG00000253250.3 C8orf88	357.177	-1.06199	0.0984679	-10.7852	4.04423e-27	5.9331e-26	9.88644	9.91996	9.96853	10.0464	9.44827	9.47133	9.46477	9.45747
ENSG00000125484.12 GTF3C4	1664.64	-0.561963	0.0521095	-10.7843	4.08464e-27	5.98891e-26	11.2737	11.3384	11.2908	11.3632	10.8758	10.9075	10.9148	10.8637
ENSG00000283537.2 AC073264.3	265.726	1.5939	0.147838	10.7814	4.21361e-27	6.17442e-26	9.10147	9.10363	9.27387	9.20617	9.95892	9.75276	9.81607	9.71148
ENSG00000136425.14 CIB2	303.601	1.15045	0.106711	10.781	4.23296e-27	6.19918e-26	9.31951	9.35896	9.40637	9.30042	9.84717	9.91382	9.78186	9.84992
ENSG00000099995.19 SF3A1	5978.52	-0.497866	0.0461947	-10.7775	4.39438e-27	6.43184e-26	12.9412	12.9039	12.8775	12.8325	12.4827	12.4731	12.3712	12.4184
ENSG00000144579.8 CTDSP1	1989.28	0.660136	0.0612798	10.7725	4.64279e-27	6.7915e-26	11.0386	11.0235	11.0189	11.0598	11.6293	11.629	11.4673	11.4889
ENSG00000126561.18 STAT5A	116.881	-2.03041	0.188516	-10.7705	4.74655e-27	6.93925e-26	9.27954	9.41418	9.3494	9.33993	8.85244	8.6789	8.84096	8.76795
ENSG00000113273.17 ARSB	552.239	0.851253	0.079079	10.7646	5.05888e-27	7.39158e-26	9.74223	9.80192	9.82169	9.85583	10.2433	10.2722	10.3168	10.2646
ENSG00000183778.17 B3GALT5	278.365	1.12248	0.104281	10.764	5.09283e-27	7.43689e-26	9.27681	9.30606	9.28134	9.36717	9.74621	9.80419	9.76861	9.80946
ENSG00000109046.15 WSB1	1974.22	0.669896	0.0622408	10.763	5.1482e-27	7.51339e-26	10.9886	11.0649	10.9836	11.055	11.6649	11.4979	11.5431	11.4834
ENSG00000141279.17 NPEPPS	2688.13	0.44135	0.041011	10.7617	5.21709e-27	7.60954e-26	11.4845	11.4635	11.4981	11.4623	11.8504	11.829	11.8535	11.8373
ENSG00000169221.14 TBC1D10B	2034.65	-0.622094	0.0578125	-10.7605	5.2856e-27	7.70501e-26	11.6097	11.5738	11.6124	11.4753	11.1369	11.0886	11.0646	11.0238
ENSG00000125898.13 FAM110A	239.049	-1.21018	0.112499	-10.7573	5.47655e-27	7.97876e-26	9.66167	9.76219	9.64823	9.68435	9.23962	9.19303	9.22035	9.19913
ENSG00000135114.13 OASL	325.491	-1.43679	0.133605	-10.754	5.67396e-27	8.2616e-26	10.0203	9.90055	9.98591	9.85583	9.3869	9.33134	9.173	9.34887
ENSG00000125977.7 EIF2S2	6059.58	-0.499993	0.0465248	-10.7468	6.1349e-27	8.92761e-26	12.9353	12.8445	12.9811	12.871	12.4533	12.4028	12.4635	12.4878
ENSG00000187583.11 PLEKHN1	334.223	0.98821	0.0919711	10.7448	6.27132e-27	9.12087e-26	9.45529	9.48086	9.42569	9.40402	9.89946	9.89403	9.89796	9.88285
ENSG00000175182.15 FAM131A	797.82	-0.789988	0.0735237	-10.7447	6.27882e-27	9.12651e-26	10.6449	10.5951	10.6563	10.5085	10.0612	10.1308	10.1	10.142
ENSG00000186625.14 KATNA1	830.633	-0.969922	0.0903093	-10.74	6.60461e-27	9.59454e-26	10.7064	10.6323	10.8182	10.5715	10.0884	10.0575	10.0017	10.152
ENSG00000182648.13 LINC01006	232.723	1.35144	0.125842	10.7392	6.66347e-27	9.67448e-26	9.17547	9.08892	9.14462	9.25304	9.74396	9.68298	9.64853	9.68972
ENSG00000100625.9 SIX4	2590.52	-0.67261	0.0626432	-10.7372	6.81034e-27	9.88203e-26	11.8569	11.8756	11.7865	11.9838	11.2752	11.3138	11.411	11.29
ENSG00000141655.17 TNFRSF11A	492.08	0.972729	0.0906483	10.7308	7.29581e-27	1.05804e-25	9.62196	9.66431	9.66101	9.79138	10.1682	10.2375	10.2021	10.1946
ENSG00000132692.19 BCAN	47.9013	3.4986	0.326188	10.7257	7.70888e-27	1.1173e-25	8.45594	8.45004	8.47683	8.47905	8.94646	9.03788	9.03817	8.98924
ENSG00000167004.13 PDIA3	23590	0.442944	0.0413057	10.7236	7.88955e-27	1.14283e-25	14.3515	14.2895	14.3915	14.2845	14.8017	14.7538	14.7076	14.7826
ENSG00000165810.17 BTNL9	799.094	0.671163	0.0626255	10.7171	8.46159e-27	1.22499e-25	10.1618	10.1327	10.1507	10.1701	10.5493	10.5556	10.5906	10.597
ENSG00000167081.18 PBX3	1028.19	-0.6364	0.0593982	-10.7141	8.73766e-27	1.26423e-25	10.7919	10.8324	10.8009	10.8428	10.372	10.3605	10.4349	10.3743
ENSG00000103404.14 USP31	1291.19	-0.763377	0.071271	-10.7109	9.04734e-27	1.30829e-25	11.0374	11.0881	11.0302	11.2098	10.5292	10.6134	10.5697	10.4851
ENSG00000133398.4 MED10	1709.31	-0.665302	0.0621169	-10.7105	9.08888e-27	1.31354e-25	11.4394	11.3828	11.4263	11.2613	10.8987	10.8963	10.8397	10.8593
ENSG00000144749.14 LRIG1	2147.69	0.572529	0.0534562	10.7102	9.11188e-27	1.31591e-25	11.0716	11.1561	11.211	11.2031	11.6031	11.6083	11.6414	11.613
ENSG00000224032.7 EPB41L4A-AS1	2672.8	-0.638822	0.0596461	-10.7102	9.11566e-27	1.31591e-25	11.9895	11.8924	11.932	11.7958	11.3255	11.418	11.3426	11.4175
ENSG00000169813.16 HNRNPF	7510.06	-0.477218	0.0445591	-10.7098	9.16027e-27	1.32159e-25	13.2012	13.1464	13.2625	13.1398	12.7413	12.7154	12.7268	12.7967
ENSG00000170242.19 USP47	1143.44	-0.653125	0.0610044	-10.7062	9.52001e-27	1.37271e-25	10.915	10.8912	10.9166	11.0015	10.4466	10.5169	10.4997	10.4521
ENSG00000105879.12 CBLL1	911.022	-0.960986	0.0897901	-10.7026	9.89738e-27	1.42631e-25	10.7168	10.7525	10.804	10.835	10.0765	10.1453	10.3005	10.0779
ENSG00000013288.9 MAN2B2	638.866	0.902392	0.0843364	10.6999	1.01875e-26	1.46727e-25	9.81739	9.89564	9.96658	9.89581	10.5038	10.4172	10.3556	10.3898
ENSG00000135250.17 SRPK2	1613.5	-0.701457	0.0655588	-10.6997	1.02159e-26	1.47053e-25	11.2651	11.3067	11.3478	11.3809	10.7234	10.7768	10.8989	10.7772
ENSG00000131626.19 PPFIA1	3227.7	-0.411231	0.0384436	-10.697	1.0514e-26	1.51257e-25	12.0617	12.0632	12.0401	12.0677	11.7196	11.7044	11.7035	11.7054
ENSG00000170577.8 SIX2	146.664	1.59042	0.148718	10.6942	1.08362e-26	1.55804e-25	8.92721	8.89397	8.93451	8.98988	9.43026	9.40735	9.3913	9.49777
ENSG00000184983.11 NDUFA6	940.734	-0.708134	0.066239	-10.6906	1.1265e-26	1.61877e-25	10.7813	10.7516	10.7562	10.6882	10.264	10.2706	10.2371	10.3469
ENSG00000170891.11 CYTL1	418.346	1.01107	0.0945797	10.6901	1.13241e-26	1.62634e-25	9.52943	9.51607	9.65591	9.57671	10.1346	10.0691	10.0369	10.0459
ENSG00000112305.15 SMAP1	1281.06	-0.628061	0.0587645	-10.6878	1.16129e-26	1.66687e-25	10.9939	11.0269	11.072	11.0942	10.5784	10.5686	10.6471	10.59
ENSG00000138119.17 MYOF	2426.27	0.733532	0.0686527	10.6847	1.2007e-26	1.72245e-25	11.2206	11.0894	11.2851	11.2774	11.9154	11.8321	11.7438	11.7693
ENSG00000075239.14 ACAT1	813.901	-0.74847	0.0700596	-10.6833	1.21814e-26	1.74648e-25	10.5547	10.5922	10.7055	10.5896	10.1555	10.1326	10.1245	10.1482
ENSG00000103429.11 BFAR	2042.13	-0.560217	0.0524622	-10.6785	1.28333e-26	1.8389e-25	11.5397	11.5602	11.6232	11.4897	11.1307	11.0716	11.1316	11.1044
ENSG00000115568.16 ZNF142	908.553	-0.777772	0.0728574	-10.6753	1.32879e-26	1.90297e-25	10.7668	10.688	10.6563	10.794	10.2238	10.2657	10.2534	10.1507
ENSG00000105438.9 KDELR1	6596.66	-0.50442	0.0472542	-10.6746	1.33817e-26	1.91531e-25	13.0683	13.0199	13.083	12.9192	12.5639	12.5693	12.5683	12.5411
ENSG00000158019.21 BABAM2	921.331	0.736875	0.0690372	10.6736	1.35287e-26	1.93525e-25	10.2498	10.262	10.2661	10.2201	10.8017	10.7779	10.6715	10.6732
ENSG00000169515.8 CCDC8	1011.08	0.788081	0.0738561	10.6705	1.39886e-26	1.99991e-25	10.3438	10.2741	10.2615	10.3639	10.9434	10.8314	10.7579	10.8248
ENSG00000127419.17 TMEM175	231.094	1.54894	0.14522	10.6661	1.46589e-26	2.09338e-25	9.12145	9.07393	9.13141	9.15314	9.88362	9.67226	9.62672	9.64486
ENSG00000069998.12 HDHD5	1150.65	-0.755121	0.0707958	-10.6662	1.46507e-26	2.09338e-25	10.9815	10.9093	11.0644	10.9036	10.4768	10.4799	10.3705	10.4502
ENSG00000158258.16 CLSTN2	207.817	1.64372	0.154116	10.6655	1.47631e-26	2.10705e-25	9.04188	9.01074	8.95177	9.19322	9.63281	9.70673	9.63221	9.63528
ENSG00000185716.12 MOSMO	930.119	-1.10439	0.103552	-10.6651	1.48241e-26	2.11457e-25	10.716	10.775	10.8019	11.0168	9.9976	10.0938	10.2255	10.1345
ENSG00000090539.15 CHRD	227.09	1.34341	0.126014	10.6608	1.55204e-26	2.21264e-25	9.12145	9.17333	9.23553	9.10736	9.75516	9.63388	9.6646	9.63336
ENSG00000181163.14 NPM1	30484.8	-0.470381	0.044125	-10.6602	1.56237e-26	2.22611e-25	15.1592	15.0796	15.2088	15.0935	14.6564	14.6219	14.6855	14.733
ENSG00000133028.12 SCO1	1609.41	-0.572417	0.0536972	-10.6601	1.56434e-26	2.22766e-25	11.2731	11.2737	11.2545	11.3276	10.8832	10.7823	10.8737	10.8593
ENSG00000021826.17 CPS1	226.243	-1.30131	0.1221	-10.6577	1.60474e-26	2.28391e-25	9.5887	9.62758	9.69849	9.74195	9.14526	9.19743	9.17521	9.14928
ENSG00000111145.8 ELK3	4864.69	-0.590212	0.0553947	-10.6547	1.65829e-26	2.35879e-25	12.5781	12.6189	12.618	12.7817	12.1441	12.1478	12.1262	12.0791
ENSG00000119203.14 CPSF3	983.65	0.680414	0.0638851	10.6506	1.73241e-26	2.46145e-25	10.3215	10.3524	10.3361	10.3052	10.8259	10.8346	10.7339	10.7373
ENSG00000162735.19 PEX19	1700.95	0.559612	0.0525427	10.6506	1.73218e-26	2.46145e-25	10.9163	10.936	10.8986	10.9028	11.4029	11.3303	11.2863	11.3437
ENSG00000204842.18 ATXN2	2422.49	-0.500596	0.0470042	-10.65	1.74294e-26	2.47502e-25	11.7446	11.7009	11.761	11.7431	11.3559	11.31	11.3653	11.282
ENSG00000182240.16 BACE2	3781.21	0.55894	0.0524883	10.6489	1.76525e-26	2.50529e-25	11.8417	11.7827	11.9274	11.753	12.3348	12.3388	12.2914	12.286
ENSG00000144233.11 AMMECR1L	1207.75	-0.588278	0.0552441	-10.6487	1.76829e-26	2.50819e-25	10.9341	10.9751	10.9737	11.0022	10.5434	10.537	10.5504	10.5944
ENSG00000120217.14 CD274	179.718	-1.35462	0.127258	-10.6447	1.84579e-26	2.61665e-25	9.47323	9.54115	9.54292	9.54802	9.01399	9.06944	9.05381	9.08926
ENSG00000072849.11 DERL2	792.867	-0.709044	0.0666435	-10.6394	1.95476e-26	2.76957e-25	10.5429	10.5856	10.5934	10.5868	10.0799	10.1235	10.1833	10.1357
ENSG00000101246.20 ARFRP1	1212.63	0.866327	0.0814505	10.6362	2.02134e-26	2.8623e-25	10.4364	10.4705	10.4553	10.4222	11.2279	11.0333	10.9442	10.9939
ENSG00000147324.11 MFHAS1	1973.64	-0.652269	0.0613304	-10.6353	2.04126e-26	2.88889e-25	11.485	11.5322	11.5141	11.6377	10.9469	11.0498	11.0848	11.0386
ENSG00000178502.6 KLHL11	756.253	-0.896543	0.0843057	-10.6344	2.06067e-26	2.91472e-25	10.5582	10.55	10.5324	10.666	10.0102	9.92683	10.1164	10.0378
ENSG00000178802.18 MPI	1908.1	0.609047	0.0572842	10.632	2.11462e-26	2.98935e-25	11.0132	11.004	11.0896	10.9501	11.5557	11.4588	11.4462	11.494
ENSG00000278175.4 GLIDR	261.901	1.12512	0.105832	10.6312	2.13361e-26	3.01452e-25	9.27954	9.32027	9.26633	9.23769	9.76625	9.74269	9.69993	9.75204
ENSG00000049130.16 KITLG	113.391	-1.97858	0.18617	-10.6278	2.21203e-26	3.12356e-25	9.23483	9.27099	9.35971	9.42447	8.74786	8.81732	8.78078	8.8225
ENSG00000118263.15 KLF7	3522.35	-0.446466	0.0420237	-10.6241	2.30113e-26	3.24756e-25	12.1843	12.1827	12.1414	12.2174	11.7624	11.8067	11.8272	11.7896
ENSG00000172893.16 DHCR7	2881.87	-0.562847	0.0529836	-10.623	2.32848e-26	3.28432e-25	12.0089	11.9684	12.0295	11.8747	11.4702	11.5235	11.4737	11.5334
ENSG00000157240.4 FZD1	2120	-0.599728	0.0564702	-10.6203	2.399e-26	3.3819e-25	11.5607	11.5583	11.6277	11.6918	11.1902	11.0895	11.1138	11.1398
ENSG00000150712.11 MTMR12	2363.4	-0.525452	0.0495146	-10.6121	2.61875e-26	3.68963e-25	11.6934	11.7035	11.6805	11.7846	11.2619	11.3062	11.3228	11.2659
ENSG00000173209.23 AHSA2P	1011.36	0.806574	0.0760361	10.6078	2.74227e-26	3.86151e-25	10.3945	10.3456	10.2904	10.1818	10.823	10.8839	10.8297	10.8448
ENSG00000263745.7 AP005230.1	66.9373	-2.59912	0.24503	-10.6073	2.75486e-26	3.87708e-25	9.10484	9.13224	9.07145	9.13933	8.51754	8.56295	8.59201	8.67299
ENSG00000182134.16 TDRKH	2246.88	0.458095	0.043189	10.6068	2.77222e-26	3.89933e-25	11.2635	11.2564	11.2858	11.2484	11.6453	11.6138	11.6257	11.6423
ENSG00000130203.10 APOE	994.005	0.793301	0.0748092	10.6043	2.84504e-26	3.99953e-25	10.2712	10.3249	10.3534	10.2289	10.9132	10.8303	10.7299	10.8166
ENSG00000128699.14 ORMDL1	758.481	-0.850217	0.0801831	-10.6035	2.87185e-26	4.03497e-25	10.5466	10.5372	10.5224	10.6642	9.95705	10.038	10.0861	10.0936
ENSG00000115233.12 PSMD14	2949.04	-0.522499	0.0492851	-10.6016	2.93027e-26	4.11476e-25	11.9934	11.9288	12.0532	11.9676	11.5054	11.55	11.5349	11.5947
ENSG00000137492.8 THAP12	1448.72	-0.735042	0.0693452	-10.5998	2.98742e-26	4.19268e-25	11.1797	11.1895	11.2493	11.2367	10.5657	10.6297	10.7071	10.7772
ENSG00000006468.14 ETV1	1715.6	0.720085	0.0679522	10.5969	3.07903e-26	4.31886e-25	10.7522	10.8943	10.7999	10.9559	11.3677	11.3796	11.4597	11.3925
ENSG00000077782.21 FGFR1	3924.99	-0.499695	0.0471599	-10.5958	3.11769e-26	4.37066e-25	12.3612	12.3546	12.3296	12.3092	11.9626	11.9411	11.8771	11.8315
ENSG00000115165.10 CYTIP	857.455	0.761857	0.0719308	10.5915	3.26233e-26	4.57088e-25	10.1918	10.1647	10.1969	10.1609	10.748	10.6677	10.5729	10.6732
ENSG00000129315.11 CCNT1	2134.65	-0.556566	0.0525539	-10.5904	3.30281e-26	4.62503e-25	11.5554	11.5794	11.6061	11.6772	11.1694	11.1141	11.1968	11.1598
ENSG00000198677.12 TTC37	2548.89	0.496833	0.0469233	10.5882	3.38032e-26	4.73095e-25	11.3751	11.3855	11.3402	11.4537	11.792	11.782	11.8171	11.7993
ENSG00000225339.4 AL354740.1	128.231	2.1588	0.203943	10.5853	3.48596e-26	4.8761e-25	8.86377	8.79802	8.80525	8.71638	9.56605	9.35	9.38608	9.29628
ENSG00000140511.12 HAPLN3	352.789	-1.09379	0.103363	-10.5821	3.60913e-26	5.04558e-25	10.042	9.86915	9.98974	9.89908	9.46887	9.45489	9.42538	9.43436
ENSG00000185736.16 ADARB2	112.446	1.99226	0.188437	10.5726	3.99354e-26	5.57991e-25	8.78174	8.87903	8.75993	8.72317	9.30419	9.26893	9.39476	9.31503
ENSG00000102316.17 MAGED2	3072.49	-0.639487	0.0605032	-10.5695	4.12796e-26	5.76454e-25	12.0817	12.0707	12.1899	11.962	11.567	11.4758	11.533	11.5723
ENSG00000256514.1 AP003419.1	2240.6	0.700827	0.0663243	10.5667	4.25332e-26	5.93631e-25	11.0856	11.2144	11.2337	11.0483	11.7673	11.7118	11.6328	11.7227
ENSG00000130558.20 OLFM1	141.701	1.78548	0.169021	10.5637	4.3908e-26	6.1248e-25	8.84435	8.87903	8.97411	8.86377	9.49476	9.44824	9.32298	9.44829
ENSG00000165475.15 CRYL1	1338.91	-0.689625	0.0652938	-10.5619	4.476e-26	6.2402e-25	11.1169	11.0946	11.2057	11.0251	10.6707	10.6172	10.5798	10.5944
ENSG00000149485.19 FADS1	9449.74	0.456734	0.0432618	10.5575	4.69179e-26	6.53382e-25	13.0269	13.0415	13.1146	13.0686	13.4416	13.4662	13.4943	13.5649
ENSG00000100221.10 JOSD1	1862.51	-0.592924	0.0561616	-10.5575	4.6912e-26	6.53382e-25	11.4314	11.3976	11.5439	11.4512	10.9583	10.9862	11.0359	10.9979
ENSG00000072042.13 RDH11	6037.35	-0.442327	0.0419041	-10.5557	4.78077e-26	6.65408e-25	12.875	12.9074	12.9113	12.8308	12.4536	12.4698	12.4509	12.5355
ENSG00000079739.17 PGM1	4905.34	0.591241	0.0560401	10.5503	5.06288e-26	7.04285e-25	12.1955	12.1073	12.2125	12.0131	12.7047	12.6755	12.6219	12.6478
ENSG00000099904.16 ZDHHC8	1945.51	-0.705952	0.066953	-10.544	5.41551e-26	7.52922e-25	11.5843	11.6249	11.4763	11.4753	11.0638	11.0425	10.9168	10.9444
ENSG00000197043.14 ANXA6	5686.32	0.609097	0.0577712	10.5433	5.45713e-26	7.58292e-25	12.3065	12.2228	12.4239	12.291	12.9414	12.8253	12.7937	12.8935
ENSG00000116525.14 TRIM62	467.273	0.886555	0.0841153	10.5398	5.66442e-26	7.86662e-25	9.69279	9.71145	9.60895	9.69024	10.1281	10.1948	10.137	10.1014
ENSG00000178691.11 SUZ12	356.986	-1.25879	0.119436	-10.5395	5.68097e-26	7.88528e-25	9.93422	9.92636	9.98014	10.1125	9.3869	9.37191	9.50422	9.34631
ENSG00000007402.12 CACNA2D2	181.922	1.3549	0.128565	10.5387	5.73129e-26	7.95075e-25	9.10147	9.08146	9.02698	9.03116	9.57922	9.54672	9.51806	9.49337
ENSG00000101266.19 CSNK2A1	5742.76	-0.419028	0.0397727	-10.5356	5.92321e-26	8.21248e-25	12.7735	12.7762	12.8429	12.8308	12.405	12.3968	12.4397	12.4563
ENSG00000188064.10 WNT7B	4035.98	-0.4732	0.0449244	-10.5332	6.07038e-26	8.41191e-25	12.3599	12.3599	12.432	12.307	11.9791	11.9618	11.9433	11.9187
ENSG00000134873.10 CLDN10	383.248	1.09627	0.104083	10.5326	6.10955e-26	8.46154e-25	9.39222	9.55235	9.5315	9.4905	10.0901	9.96294	9.99369	10.0186
ENSG00000132128.17 LRRC41	3309.17	-0.598493	0.0568381	-10.5298	6.29722e-26	8.71667e-25	12.2093	12.1573	12.2193	12.0348	11.6517	11.6853	11.5948	11.6546
ENSG00000115762.16 PLEKHB2	4187.39	-0.443837	0.0421568	-10.5282	6.40221e-26	8.85715e-25	12.3535	12.4097	12.4323	12.4128	11.9737	12.008	12.0526	12.0069
ENSG00000109320.13 NFKB1	1830.47	-0.537018	0.0510336	-10.5228	6.78024e-26	9.375e-25	11.4127	11.37	11.447	11.4425	10.9531	11.0231	11.0332	10.9959
ENSG00000079246.16 XRCC5	8887.88	-0.398494	0.0378785	-10.5203	6.96421e-26	9.6241e-25	13.3816	13.361	13.4446	13.3536	13.0306	12.9821	13.0194	13.0133
ENSG00000185651.15 UBE2L3	2493.91	-0.503707	0.0479	-10.5158	7.30534e-26	1.009e-24	11.7836	11.7625	11.809	11.7382	11.4168	11.3123	11.3408	11.3716
ENSG00000168806.8 LCMT2	311.333	1.00858	0.0959191	10.5149	7.37671e-26	1.0183e-24	9.38008	9.41418	9.41929	9.37518	9.87762	9.84652	9.85155	9.79953
ENSG00000172752.14 COL6A5	54.5338	2.83293	0.269529	10.5107	7.71203e-26	1.06401e-24	8.53794	8.50489	8.57736	8.52852	9.02382	9.08473	9.0195	9.01269
ENSG00000006695.12 COX10	945.021	-0.660773	0.0628692	-10.5103	7.7459e-26	1.0681e-24	10.6976	10.7133	10.8019	10.735	10.2857	10.314	10.3276	10.2758
ENSG00000108821.14 COL1A1	5234.42	0.975288	0.0928227	10.507	8.02071e-26	1.10539e-24	12.0293	12.0251	11.9641	11.9973	13.1313	12.9577	12.6461	12.7278
ENSG00000175093.5 SPSB4	72.3129	2.31695	0.220562	10.5047	8.21604e-26	1.13169e-24	8.6634	8.66572	8.5649	8.65014	9.14941	9.14772	9.14827	9.0823
ENSG00000067066.17 SP100	1598.83	-0.631677	0.0601441	-10.5027	8.39116e-26	1.15518e-24	11.3192	11.2569	11.3451	11.2484	10.8114	10.7956	10.7646	10.8987
ENSG00000147650.12 LRP12	1848.88	-0.601012	0.0572304	-10.5016	8.49083e-26	1.16826e-24	11.4093	11.4071	11.4509	11.5325	10.9284	10.9805	11.0314	10.9926
ENSG00000266208.1 AC080112.1	66.7642	2.57603	0.245315	10.5009	8.55252e-26	1.17611e-24	8.62615	8.50489	8.62318	8.61693	9.16582	9.10466	9.07666	9.08578
ENSG00000163618.18 CADPS	104.44	1.82943	0.174231	10.5	8.63607e-26	1.18695e-24	8.79808	8.76196	8.75198	8.84805	9.30419	9.26489	9.23694	9.28539
ENSG00000142173.16 COL6A2	187498	0.654755	0.0623693	10.498	8.81951e-26	1.21151e-24	17.2219	17.1332	17.1731	17.1019	17.9691	17.8565	17.7006	17.6992
ENSG00000155893.13 PXYLP1	411.401	0.897868	0.0855329	10.4973	8.88477e-26	1.21981e-24	9.53153	9.59599	9.61427	9.62773	10.0245	10.0439	10.0437	10.0364
ENSG00000138442.10 WDR12	1403.03	-0.682626	0.0650549	-10.4931	9.29617e-26	1.2756e-24	11.1751	11.1498	11.1973	11.1304	10.6359	10.5582	10.7111	10.7373
ENSG00000175772.11 LINC01106	454.254	-0.845564	0.0806001	-10.4908	9.51706e-26	1.3052e-24	10.0802	10.1341	10.1133	10.1057	9.68148	9.66143	9.70379	9.63528
ENSG00000122692.9 SMU1	2298.89	-0.522518	0.0498282	-10.4864	9.97683e-26	1.36751e-24	11.6879	11.649	11.7418	11.6448	11.2654	11.2762	11.2117	11.2858
ENSG00000134775.15 FHOD3	1185.32	0.698171	0.0666236	10.4793	1.07502e-25	1.47271e-24	10.4808	10.4716	10.4854	10.5354	11.0492	11.0452	10.9286	10.9057
ENSG00000166897.16 ELFN2	1578.7	-0.649081	0.0619578	-10.4762	1.11155e-25	1.52194e-24	11.2795	11.3	11.2337	11.3154	10.823	10.8911	10.7507	10.7294
ENSG00000249459.11 ZNF286B	129.039	-1.76982	0.168955	-10.4751	1.12425e-25	1.53849e-24	9.45981	9.40905	9.31779	9.31756	8.83306	8.89521	8.9051	8.81728
ENSG00000114933.16 INO80D	597.755	-1.53149	0.14621	-10.4745	1.13075e-25	1.54654e-24	10.4156	10.4911	10.3038	10.6803	9.48906	9.54369	9.80439	9.66378
ENSG00000058600.16 POLR3E	1314.43	-0.631114	0.0602707	-10.4713	1.16996e-25	1.5993e-24	11.085	11.1295	11.0259	11.0537	10.5761	10.6952	10.5993	10.6189
ENSG00000185507.21 IRF7	945.514	-0.644145	0.0615553	-10.4645	1.25753e-25	1.71808e-24	10.7389	10.7271	10.7792	10.6829	10.3351	10.3092	10.2792	10.3124
ENSG00000160685.13 ZBTB7B	459.847	1.08352	0.103581	10.4606	1.31049e-25	1.78947e-24	9.6964	9.63173	9.61161	9.48099	10.2343	10.1381	10.1564	10.1282
ENSG00000107140.16 TESK1	747.384	-0.781545	0.0747146	-10.4604	1.31289e-25	1.79178e-24	10.542	10.5884	10.562	10.454	10.1018	10.0261	10.0908	10.0117
ENSG00000163131.12 CTSS	171.876	1.64574	0.157345	10.4594	1.32682e-25	1.80981e-24	9.01965	8.90856	8.97958	9.02309	9.40572	9.51909	9.57306	9.6139
ENSG00000177628.16 GBA	259.581	1.22424	0.117068	10.4575	1.35426e-25	1.84625e-24	9.23769	9.23449	9.24721	9.2711	9.83476	9.78731	9.67255	9.6952
ENSG00000087086.15 FTL	15079.4	-0.632172	0.0604556	-10.4568	1.36379e-25	1.85823e-24	14.2932	14.1436	14.3236	14.0563	13.6258	13.5963	13.57	13.6097
ENSG00000074582.15 BCS1L	422.893	-0.988311	0.0945536	-10.4524	1.4288e-25	1.94575e-24	10.1059	10.017	10.1202	10.0579	9.66951	9.57952	9.52869	9.55951
ENSG00000064652.11 SNX24	321.82	1.31452	0.125802	10.4491	1.47911e-25	2.01319e-24	9.35532	9.22197	9.32845	9.42951	9.87762	9.89846	10.0224	9.86415
ENSG00000114279.14 FGF12	74.459	2.35124	0.225107	10.445	1.54469e-25	2.10131e-24	8.59352	8.65009	8.64414	8.68083	9.1819	9.13363	9.1927	9.06817
ENSG00000161021.13 MAML1	2636.8	-0.451236	0.0432038	-10.4444	1.55492e-25	2.11408e-24	11.8245	11.8212	11.8036	11.8389	11.4533	11.4939	11.4299	11.4247
ENSG00000159079.19 CFAP298	1441.32	-0.652263	0.0624713	-10.441	1.61111e-25	2.1893e-24	11.2022	11.1815	11.2419	11.1034	10.6984	10.6616	10.6739	10.7779
ENSG00000131650.14 KREMEN2	263.93	-1.35565	0.129873	-10.4383	1.65764e-25	2.25132e-24	9.88644	9.64814	9.78133	9.78238	9.27607	9.20181	9.17742	9.2519
ENSG00000068878.15 PSME4	4363.26	-0.573253	0.054937	-10.4347	1.72096e-25	2.33606e-24	12.4603	12.47	12.4955	12.5848	11.8882	12.0075	12.0509	12.0333
ENSG00000159212.13 CLIC6	645.096	0.810504	0.0776795	10.434	1.7352e-25	2.35412e-24	9.90608	9.91996	9.8818	10.0186	10.4196	10.4142	10.4335	10.3565
ENSG00000136802.12 LRRC8A	1732.37	-0.574917	0.0551071	-10.4327	1.75806e-25	2.38386e-24	11.3742	11.3516	11.4079	11.331	11.0087	10.8911	10.9059	10.9001
ENSG00000035687.10 ADSS2	1541.06	-0.604396	0.0579606	-10.4277	1.85321e-25	2.51153e-24	11.2089	11.2334	11.2011	11.3243	10.8402	10.752	10.7794	10.7978
ENSG00000197608.11 ZNF841	261.789	-1.1546	0.110735	-10.4268	1.8718e-25	2.53536e-24	9.80439	9.71145	9.75594	9.70774	9.28318	9.20181	9.30793	9.27437
ENSG00000170540.15 ARL6IP1	2312.13	-0.597038	0.0572713	-10.4247	1.91204e-25	2.58848e-24	11.618	11.7304	11.7444	11.7608	11.1671	11.2248	11.2885	11.2386
ENSG00000100678.19 SLC8A3	220.615	1.15526	0.110821	10.4246	1.91544e-25	2.59169e-24	9.1816	9.17998	9.22766	9.16672	9.61777	9.61984	9.63358	9.64295
ENSG00000104228.13 TRIM35	542.96	-0.918583	0.0881222	-10.424	1.92735e-25	2.60641e-24	10.314	10.3062	10.2193	10.2499	9.84717	9.81373	9.73792	9.69155
ENSG00000127666.10 TICAM1	1328.17	-0.689675	0.0661668	-10.4233	1.94128e-25	2.62385e-24	11.1103	11.1257	11.148	11.0251	10.7015	10.5957	10.588	10.5432
ENSG00000008282.9 SYPL1	1768.12	-0.878021	0.0842392	-10.4229	1.94815e-25	2.63173e-24	11.3811	11.457	11.4165	11.658	10.691	10.8537	10.8904	10.8016
ENSG00000166889.14 PATL1	1986.95	-0.509204	0.0488808	-10.4173	2.06838e-25	2.79265e-24	11.454	11.5298	11.4963	11.5359	11.1059	11.1054	11.1291	11.0725
ENSG00000134874.18 DZIP1	1647.65	0.582238	0.055937	10.4088	2.26032e-25	3.05016e-24	10.8451	10.866	10.8619	10.9088	11.2703	11.3939	11.3117	11.2686
ENSG00000134910.14 STT3A	4911.73	-0.436901	0.0419977	-10.403	2.40269e-25	3.24055e-24	12.6158	12.5808	12.6672	12.5605	12.2446	12.2135	12.1951	12.2091
ENSG00000132109.10 TRIM21	735.19	-0.674026	0.0647921	-10.4029	2.40517e-25	3.24217e-24	10.4931	10.4757	10.5072	10.4994	10.0984	10.1013	10.0465	10.091
ENSG00000103381.12 CPPED1	111.108	-1.76672	0.170009	-10.3919	2.69974e-25	3.63731e-24	9.25747	9.29161	9.28875	9.36178	8.79217	8.76979	8.85505	8.84289
ENSG00000135457.10 TFCP2	944.269	-0.615119	0.0591987	-10.3908	2.73151e-25	3.67814e-24	10.7176	10.709	10.754	10.7153	10.3282	10.282	10.3114	10.348
ENSG00000229628.1 AC073115.1	108.582	2.0482	0.19738	10.3769	3.15819e-25	4.25043e-24	8.85414	8.76196	8.6338	8.79224	9.30764	9.34258	9.28099	9.30704
ENSG00000173227.14 SYT12	68.9844	2.45033	0.236139	10.3767	3.1669e-25	4.25987e-24	8.6102	8.58044	8.65422	8.61693	9.1739	9.14772	9.03817	9.103
ENSG00000109332.20 UBE2D3	6422.36	-0.736667	0.071029	-10.3714	3.34713e-25	4.49991e-24	12.954	13.053	13.1021	13.1766	12.2911	12.3229	12.5546	12.4114
ENSG00000033050.9 ABCF2	864.22	0.653122	0.062974	10.3713	3.34957e-25	4.5008e-24	10.2189	10.2237	10.1969	10.2622	10.6686	10.6408	10.6037	10.6707
ENSG00000167468.18 GPX4	7802	-0.623658	0.0601429	-10.3696	3.40917e-25	4.57844e-24	13.3763	13.2893	13.365	13.1398	12.7433	12.7043	12.6487	12.7667
ENSG00000136048.14 DRAM1	505.345	0.796205	0.0767899	10.3686	3.44506e-25	4.62419e-24	9.75083	9.74739	9.75126	9.78419	10.1729	10.2155	10.1494	10.2101
ENSG00000125740.14 FOSB	301.911	-1.30307	0.125687	-10.3675	3.4852e-25	4.67557e-24	9.9731	9.86747	9.89842	9.72498	9.24334	9.28097	9.33778	9.34887
ENSG00000160214.13 RRP1	1179.77	-0.731571	0.0706155	-10.3599	3.7726e-25	5.05844e-24	11.0266	10.9949	11.0189	10.899	10.4879	10.5569	10.3889	10.4765
ENSG00000138750.15 NUP54	1176.73	-0.58756	0.0567463	-10.3541	4.00736e-25	5.37038e-24	10.9516	10.9078	10.9601	10.9552	10.5315	10.525	10.5754	10.4927
ENSG00000176994.11 SMCR8	2827.48	-0.476684	0.0460438	-10.3528	4.06273e-25	5.43881e-24	11.9568	11.9273	11.8488	11.9345	11.4977	11.5384	11.5342	11.5082
ENSG00000155380.13 SLC16A1	2354.85	-0.623389	0.0602141	-10.3529	4.06069e-25	5.43881e-24	11.6879	11.7254	11.7107	11.8508	11.1746	11.2296	11.3073	11.2408
ENSG00000141756.19 FKBP10	14979.1	0.529581	0.051171	10.3492	4.21797e-25	5.64363e-24	13.6927	13.6801	13.6992	13.5205	14.208	14.1656	14.0977	14.1633
ENSG00000171295.13 ZNF440	45.1704	-3.30868	0.319726	-10.3485	4.251e-25	5.68481e-24	8.99671	8.9682	8.96303	8.98132	8.54458	8.44631	8.46434	8.42726
ENSG00000090565.17 RAB11FIP3	870.385	-0.72789	0.0703496	-10.3467	4.32952e-25	5.78675e-24	10.7342	10.7228	10.6041	10.6196	10.1823	10.2458	10.2046	10.191
ENSG00000004779.10 NDUFAB1	1088.82	-0.679374	0.0656851	-10.3429	4.50719e-25	6.02103e-24	10.9087	10.892	10.9564	10.7916	10.4079	10.3936	10.437	10.4482
ENSG00000144649.9 GASK1A	97.1191	1.89691	0.183435	10.341	4.59494e-25	6.13501e-24	8.73545	8.74292	8.84032	8.73646	9.28318	9.22335	9.23694	9.21709
ENSG00000107185.10 RGP1	3876.88	0.598501	0.0579196	10.3333	4.98119e-25	6.6472e-24	11.8053	11.898	11.7563	11.8845	12.4206	12.4234	12.2839	12.3059
ENSG00000115649.16 CNPPD1	1449.89	-0.781524	0.0756325	-10.3332	4.98834e-25	6.65323e-24	11.2468	11.2732	11.308	11.0665	10.6952	10.7046	10.6111	10.6084
ENSG00000124243.18 BCAS4	381.444	-1.04175	0.100817	-10.333	4.99695e-25	6.6612e-24	9.98859	10.0096	10.1063	9.90559	9.47178	9.54369	9.50422	9.49777
ENSG00000154127.10 UBASH3B	8028.5	-0.451444	0.0436928	-10.3322	5.03739e-25	6.71155e-24	13.2308	13.2332	13.2492	13.3565	12.8436	12.8423	12.8235	12.8817
ENSG00000196715.7 VKORC1L1	2037.92	-0.494152	0.0478492	-10.3273	5.30523e-25	7.06469e-24	11.5077	11.5144	11.527	11.5685	11.1028	11.1202	11.172	11.1528
ENSG00000152291.14 TGOLN2	6310.38	0.449666	0.0435433	10.3269	5.32683e-25	7.08971e-24	12.4702	12.5258	12.5172	12.6102	12.9393	12.9541	12.9593	12.9201
ENSG00000140694.17 PARN	852.221	-0.6445	0.0624117	-10.3266	5.34325e-25	7.10782e-24	10.6135	10.6532	10.6029	10.6498	10.1777	10.2223	10.2469	10.2195
ENSG00000164305.19 CASP3	992.921	-0.795664	0.0770533	-10.3262	5.36709e-25	7.13577e-24	10.7684	10.7708	10.8648	10.8915	10.2328	10.2408	10.3911	10.2948
ENSG00000119866.22 BCL11A	263.616	1.14825	0.111291	10.3176	5.86785e-25	7.79745e-24	9.21745	9.29161	9.25491	9.33439	9.73945	9.70673	9.73916	9.80285
ENSG00000184445.12 KNTC1	750.253	0.824184	0.0798895	10.3166	5.93095e-25	7.87715e-24	9.99417	10.0448	9.99356	10.145	10.6103	10.5621	10.5446	10.487
ENSG00000100380.14 ST13	4726.07	-0.419514	0.0406762	-10.3135	6.12439e-25	8.12979e-24	12.567	12.4985	12.5679	12.5647	12.2041	12.1339	12.1889	12.1731
ENSG00000141385.10 AFG3L2	3238.46	-0.475054	0.046091	-10.3069	6.56139e-25	8.70531e-24	12.082	12.0392	12.1315	12.0925	11.7094	11.6181	11.7018	11.6911
ENSG00000135912.11 TTLL4	1040.1	-0.599098	0.0581489	-10.3028	6.84315e-25	9.07436e-24	10.8106	10.784	10.8481	10.8247	10.4196	10.4475	10.4064	10.3764
ENSG00000141127.15 PRPSAP2	1514.81	-0.581889	0.0564823	-10.3022	6.88976e-25	9.13137e-24	11.2635	11.1913	11.1772	11.2295	10.7909	10.7989	10.7243	10.8271
ENSG00000241878.11 PISD	776.982	-0.778089	0.0755313	-10.3015	6.93384e-25	9.18497e-24	10.5953	10.5932	10.638	10.4603	10.1249	10.0919	10.0665	10.0845
ENSG00000213983.12 AP1G2	1095.5	0.910117	0.0883569	10.3005	7.01173e-25	9.28328e-24	10.4354	10.4133	10.3023	10.174	10.9168	11.0203	10.9114	10.9741
ENSG00000075240.17 GRAMD4	851.003	-0.65615	0.0637038	-10.3	7.04502e-25	9.32246e-24	10.6373	10.6045	10.6229	10.6552	10.2683	10.2121	10.1799	10.1922
ENSG00000169895.6 SYAP1	771.337	-0.663268	0.0643963	-10.2998	7.06226e-25	9.34038e-24	10.5438	10.5313	10.5274	10.5482	10.0731	10.1632	10.1361	10.132
ENSG00000226752.9 CUTALP	200.783	1.24348	0.120778	10.2956	7.37838e-25	9.75336e-24	9.11815	9.09998	9.09507	9.18996	9.57134	9.56474	9.58028	9.60799
ENSG00000184014.9 DENND5A	5871.29	-0.381839	0.037111	-10.2891	7.88993e-25	1.04241e-23	12.7974	12.8342	12.8472	12.8014	12.4889	12.4993	12.4585	12.445
ENSG00000182208.14 MOB2	2629.88	-0.651013	0.0632758	-10.2885	7.94074e-25	1.04858e-23	11.9389	11.8976	11.9506	11.7567	11.4099	11.3925	11.3091	11.2948
ENSG00000165215.6 CLDN3	148.897	1.44627	0.140669	10.2814	8.55089e-25	1.12856e-23	8.95257	8.93676	9.03205	8.95499	9.46303	9.41429	9.41359	9.4107
ENSG00000162390.18 ACOT11	212.339	1.40792	0.136958	10.2799	8.68069e-25	1.14509e-23	9.10147	9.11806	9.05692	9.17343	9.74171	9.65598	9.55111	9.59807
ENSG00000288679.1 AC104633.2	46.3236	3.49949	0.340444	10.2792	8.74512e-25	1.15299e-23	8.49429	8.49228	8.41745	8.41653	9.05254	8.99925	8.92714	8.98526
ENSG00000143195.13 ILDR2	61.0471	2.48378	0.241654	10.2782	8.83314e-25	1.16398e-23	8.56691	8.58991	8.6338	8.57074	9.10249	9.08473	9.04863	9.03166
ENSG00000074370.18 ATP2A3	797.538	0.687004	0.0668526	10.2764	9.00213e-25	1.18563e-23	10.152	10.1971	10.1167	10.1153	10.5327	10.6109	10.5981	10.5614
ENSG00000129673.10 AANAT	47.7431	3.7668	0.366676	10.2728	9.34237e-25	1.2298e-23	8.42614	8.50489	8.41745	8.41653	9.01399	9.07967	9.03553	8.89094
ENSG00000155438.12 NIFK	1423.9	-0.600639	0.0584751	-10.2717	9.45245e-25	1.24364e-23	11.195	11.1141	11.1417	11.1663	10.661	10.6713	10.7423	10.7725
ENSG00000128872.10 TMOD2	612.962	0.969893	0.0944372	10.2702	9.59603e-25	1.26188e-23	9.77457	9.84887	9.79042	9.94709	10.2986	10.3921	10.4814	10.398
ENSG00000178028.14 DMAP1	682.912	0.761746	0.0741831	10.2685	9.77548e-25	1.28481e-23	9.966	10.0346	10.0143	9.95957	10.5256	10.404	10.4321	10.4234
ENSG00000133030.22 MPRIP	10763.1	-0.63492	0.0618635	-10.2632	1.03194e-24	1.35559e-23	13.6731	13.7234	13.6684	13.8862	13.2321	13.1728	13.0719	13.0763
ENSG00000141485.17 SLC13A5	53.3797	2.94272	0.286804	10.2604	1.06277e-24	1.39463e-23	8.57602	8.52849	8.49361	8.47905	9.0847	9.05907	8.99475	8.98526
ENSG00000137825.11 ITPKA	327.278	-1.39491	0.13595	-10.2604	1.0624e-24	1.39463e-23	9.93129	9.89072	9.96658	9.97653	9.16175	9.47133	9.30032	9.34117
ENSG00000259583.3 AC015712.2	145.715	-1.80969	0.176402	-10.2589	1.07929e-24	1.41558e-23	9.48648	9.53889	9.37664	9.37518	8.86501	9.0105	8.85156	8.86258
ENSG00000155158.20 TTC39B	455.773	-0.908291	0.0885492	-10.2575	1.09532e-24	1.43586e-23	10.0379	10.111	10.1608	10.1805	9.64272	9.67226	9.68045	9.62172
ENSG00000041982.16 TNC	4382.99	-0.692068	0.0674784	-10.2561	1.11065e-24	1.4552e-23	12.4649	12.4844	12.56	12.6856	11.8121	11.9488	11.9836	12.0072
ENSG00000112972.15 HMGCS1	2874.29	-0.603342	0.0588489	-10.2524	1.15447e-24	1.51182e-23	11.9256	11.9925	11.988	12.0247	11.4048	11.4053	11.5128	11.5757
ENSG00000027697.15 IFNGR1	1161.5	-0.617061	0.0601883	-10.2522	1.15704e-24	1.5144e-23	10.928	10.9463	10.9371	10.9458	10.4504	10.4645	10.5387	10.5686
ENSG00000106078.19 COBL	139.625	1.51207	0.147521	10.2498	1.18586e-24	1.55133e-23	8.90081	8.92281	8.96859	8.94598	9.37415	9.40735	9.35235	9.4506
ENSG00000140400.17 MAN2C1	2900.82	0.751971	0.0733749	10.2483	1.20403e-24	1.57428e-23	11.5022	11.4875	11.4282	11.2224	12.091	12.0625	11.9808	12.037
ENSG00000001036.14 FUCA2	532.801	0.862414	0.0841975	10.2428	1.27552e-24	1.6669e-23	9.69099	9.79122	9.81727	9.80739	10.2025	10.2206	10.2887	10.2668
ENSG00000182774.13 RPS17	15620.5	-0.616323	0.0601788	-10.2415	1.29172e-24	1.68719e-23	14.3466	14.1259	14.3205	14.2021	13.6989	13.5869	13.6021	13.7393
ENSG00000069482.7 GAL	697.768	1.16305	0.11365	10.2336	1.40266e-24	1.83114e-23	9.87264	9.90543	9.95876	9.7382	10.3653	10.549	10.5918	10.6971
ENSG00000183520.12 UTP11	1616.3	-0.509346	0.049773	-10.2334	1.40527e-24	1.83361e-23	11.2549	11.2662	11.2966	11.2496	10.8786	10.8611	10.8645	10.9231
ENSG00000103449.12 SALL1	1083.9	-0.609178	0.0595413	-10.2312	1.4375e-24	1.87469e-23	10.8702	10.8481	10.8382	10.8983	10.4092	10.4432	10.4997	10.4274
ENSG00000178718.7 RPP25	1434.67	0.607465	0.0593757	10.2309	1.4421e-24	1.87971e-23	10.7475	10.6942	10.7823	10.6489	11.1872	11.1246	11.1426	11.1989
ENSG00000077684.16 JADE1	1136.84	-0.65293	0.0638448	-10.2268	1.50355e-24	1.95881e-23	10.9032	10.9071	10.9278	10.9696	10.468	10.3921	10.5413	10.4803
ENSG00000142207.7 URB1	1752.83	-0.553983	0.0541954	-10.222	1.58127e-24	2.05899e-23	11.3497	11.4045	11.3333	11.4021	11.0171	10.9425	10.9345	10.9015
ENSG00000125945.15 ZNF436	663.438	0.820329	0.0803099	10.2145	1.70673e-24	2.22121e-23	9.89857	9.99006	9.93699	9.97347	10.5292	10.4389	10.3772	10.3888
ENSG00000246100.4 LINC00900	50.0348	3.06743	0.300303	10.2144	1.70865e-24	2.22257e-23	8.55755	8.45004	8.4588	8.52852	9.00402	8.97619	9.05894	9.00106
ENSG00000138311.18 ZNF365	563.398	0.934108	0.0914547	10.2139	1.71835e-24	2.23403e-23	9.69279	9.77316	9.84135	9.8609	10.28	10.2689	10.2973	10.3898
ENSG00000090615.15 GOLGA3	3140.62	-0.616801	0.060411	-10.2101	1.78732e-24	2.3225e-23	12.1711	12.1217	11.9976	12.0967	11.5229	11.5449	11.6762	11.5495
ENSG00000148180.21 GSN	4067.48	0.461057	0.045181	10.2047	1.88957e-24	2.45411e-23	11.9518	11.9349	12.0278	11.9492	12.4072	12.4021	12.3239	12.3492
ENSG00000103148.17 NPRL3	1136.29	-0.674224	0.0660757	-10.2038	1.90623e-24	2.47448e-23	10.9795	10.9779	10.9071	10.8515	10.5111	10.4964	10.437	10.4183
ENSG00000111641.12 NOP2	1697.42	-0.752376	0.0737429	-10.2027	1.92858e-24	2.5022e-23	11.2381	11.4217	11.4944	11.4245	10.859	10.8726	10.8186	10.7554
ENSG00000182831.12 C16orf72	2270.99	-0.868265	0.085103	-10.2025	1.93182e-24	2.50512e-23	11.6823	11.7449	11.7439	11.9294	10.9239	11.0626	11.2204	11.0996
ENSG00000162139.10 NEU3	623.996	-0.722994	0.0708717	-10.2015	1.95316e-24	2.53149e-23	10.3606	10.3648	10.3303	10.3673	9.92476	9.89403	9.93739	9.98644
ENSG00000088205.13 DDX18	1753.17	-0.544434	0.0533763	-10.1999	1.98434e-24	2.57059e-23	11.3557	11.3753	11.3697	11.3862	10.9381	10.8757	11.0006	10.9873
ENSG00000130726.12 TRIM28	14107.8	-0.52507	0.0514819	-10.1991	2.00109e-24	2.59095e-23	14.1486	14.0916	14.0991	13.9477	13.6291	13.5708	13.5209	13.5584
ENSG00000181449.4 SOX2	127.068	1.7072	0.167395	10.1986	2.01142e-24	2.60299e-23	8.81912	8.93215	8.92275	8.80386	9.35796	9.31613	9.3913	9.38399
ENSG00000088756.13 ARHGAP28	133.505	1.77469	0.17403	10.1976	2.03163e-24	2.6278e-23	8.85898	8.89887	8.80525	8.92757	9.30764	9.36102	9.49957	9.4083
ENSG00000154914.17 USP43	1123.21	0.605279	0.0593853	10.1924	2.14377e-24	2.77143e-23	10.4694	10.4962	10.4579	10.4964	10.8739	10.9582	10.8496	10.9162
ENSG00000134769.22 DTNA	1719.62	-0.640484	0.0628678	-10.1878	2.24811e-24	2.90482e-23	11.4127	11.3548	11.447	11.3014	10.859	10.8357	10.9701	10.8859
ENSG00000180867.11 PDIA3P1	186.297	1.2877	0.126503	10.1792	2.45561e-24	3.17132e-23	9.06345	9.06632	9.15762	9.06257	9.53649	9.50025	9.56141	9.55537
ENSG00000156642.17 NPTN	3983.27	0.419111	0.0411833	10.1767	2.51903e-24	3.25156e-23	11.9558	11.908	11.9945	11.9855	12.3351	12.3428	12.3053	12.3291
ENSG00000105698.16 USF2	2077.99	-0.529736	0.0520643	-10.1746	2.57357e-24	3.32026e-23	11.6238	11.5621	11.5653	11.4986	11.1544	11.163	11.1	11.1598
ENSG00000116147.17 TNR	40.1918	4.15168	0.408092	10.1734	2.6065e-24	3.36103e-23	8.39076	8.41651	8.43917	8.37524	8.92424	8.94622	8.95442	8.97722
ENSG00000168778.13 TCTN2	174.719	1.40346	0.138029	10.1679	2.75755e-24	3.55399e-23	8.977	9.05863	9.04707	9.05872	9.52552	9.57363	9.43869	9.51948
ENSG00000052850.8 ALX4	797.894	0.687224	0.0675997	10.1661	2.80972e-24	3.61753e-23	10.1147	10.1528	10.1287	10.1831	10.6337	10.5893	10.5315	10.5523
ENSG00000131778.19 CHD1L	3114.73	0.489339	0.0481344	10.1661	2.80924e-24	3.61753e-23	11.6444	11.6182	11.6613	11.5852	12.0765	12.0401	11.9715	12.08
ENSG00000159256.13 MORC3	1237.53	-0.787933	0.0775445	-10.161	2.95879e-24	3.80752e-23	11.01	11.0145	11.0084	11.1806	10.4092	10.4659	10.5811	10.5266
ENSG00000088305.18 DNMT3B	682.226	-0.708076	0.0696861	-10.1609	2.96192e-24	3.80961e-23	10.4462	10.4252	10.4671	10.3961	9.96639	10.038	10.0427	9.99351
ENSG00000100281.14 HMGXB4	1276.93	-0.584638	0.057541	-10.1604	2.97894e-24	3.82954e-23	11.0036	11.0082	11.0837	11.0278	10.5967	10.5673	10.6603	10.6163
ENSG00000185880.13 TRIM69	846.792	0.639721	0.0629696	10.1592	3.01503e-24	3.87199e-23	10.1775	10.2212	10.2445	10.2163	10.6159	10.6084	10.6603	10.5988
ENSG00000086598.11 TMED2	6340.58	-0.539117	0.0530668	-10.1592	3.0147e-24	3.87199e-23	12.9491	12.9256	12.9977	13.062	12.4227	12.461	12.5861	12.4855
ENSG00000108379.10 WNT3	236.61	1.26899	0.124937	10.1571	3.08233e-24	3.95641e-23	9.23196	9.09998	9.27761	9.16335	9.70736	9.71194	9.68828	9.65436
ENSG00000143869.7 GDF7	79.3988	2.1652	0.213285	10.1516	3.25846e-24	4.18036e-23	8.65622	8.69534	8.72731	8.63389	9.12416	9.23602	9.11328	9.17769
ENSG00000091879.14 ANGPT2	1938.09	-0.719976	0.0709299	-10.1505	3.29583e-24	4.22617e-23	11.454	11.4448	11.57	11.6888	11.0028	10.9425	10.9743	11.0024
ENSG00000159147.18 DONSON	562.69	-0.765063	0.0753862	-10.1486	3.36198e-24	4.30879e-23	10.3075	10.2547	10.2993	10.2301	9.80529	9.86712	9.87167	9.83552
ENSG00000152527.14 PLEKHH2	839.277	-0.789473	0.0777999	-10.1475	3.40021e-24	4.35559e-23	10.5447	10.6369	10.6845	10.7341	10.1117	10.2086	10.1652	10.118
ENSG00000156966.7 B3GNT7	224.234	1.28827	0.127026	10.1417	3.60706e-24	4.61821e-23	9.10147	9.18328	9.25107	9.13234	9.59738	9.65598	9.71274	9.65625
ENSG00000054690.14 PLEKHH1	1450.39	-0.638889	0.0630153	-10.1386	3.72283e-24	4.76402e-23	11.2222	11.2494	11.0912	11.175	10.713	10.7128	10.769	10.6682
ENSG00000112651.12 MRPL2	1670.9	-0.606179	0.0598083	-10.1354	3.84893e-24	4.92289e-23	11.3421	11.3667	11.3819	11.2431	10.9257	10.9014	10.8276	10.8484
ENSG00000048740.18 CELF2	459.661	1.04296	0.102903	10.1353	3.85101e-24	4.92306e-23	9.56254	9.65018	9.56539	9.7	10.2132	10.0517	10.2288	10.1231
ENSG00000120708.17 TGFBI	35234.6	0.690338	0.0681294	10.1327	3.95376e-24	5.05185e-23	14.6885	14.6815	14.8539	14.7702	15.5862	15.4695	15.2661	15.3738
ENSG00000119684.16 MLH3	695.814	0.692142	0.0683188	10.1311	4.02256e-24	5.13716e-23	9.99695	10.0155	10.0531	10.0636	10.4479	10.4812	10.4504	10.4103
ENSG00000115266.12 APC2	362.339	1.01278	0.0999789	10.13	4.06835e-24	5.193e-23	9.53572	9.53663	9.39327	9.44944	10.0048	9.94609	9.94053	9.94901
ENSG00000141682.12 PMAIP1	1606.36	-0.871285	0.086057	-10.1245	4.30145e-24	5.48777e-23	11.2441	11.2971	11.3656	11.552	10.6314	10.6785	10.781	10.7679
ENSG00000125810.10 CD93	130.14	1.72317	0.170204	10.1241	4.31919e-24	5.50762e-23	8.87793	8.81518	8.90468	8.9038	9.2689	9.36466	9.41359	9.45289
ENSG00000174996.12 KLC2	3012.91	-0.428967	0.0423715	-10.1239	4.32633e-24	5.51394e-23	12.0029	11.9825	11.9681	11.9627	11.6528	11.5904	11.6352	11.5887
ENSG00000164823.11 OSGIN2	1902.59	-0.837712	0.0827483	-10.1236	4.34097e-24	5.52981e-23	11.4295	11.4855	11.5677	11.7261	10.7909	10.9355	10.9173	10.9747
ENSG00000182552.15 RWDD4	742.193	-0.903315	0.0892859	-10.1171	4.63931e-24	5.90687e-23	10.4818	10.6101	10.4957	10.6471	9.96079	9.92899	10.036	10.1001
ENSG00000185049.16 NELFA	2153.73	-0.624147	0.0616968	-10.1164	4.67483e-24	5.9491e-23	11.6647	11.6187	11.7165	11.5416	11.1701	11.2037	11.0752	11.1111
ENSG00000177426.22 TGIF1	4360.17	-0.461459	0.0456223	-10.1148	4.75138e-24	6.04347e-23	12.4688	12.4315	12.5395	12.4004	12.0721	12.0455	12.0573	12.0358
ENSG00000171798.18 KNDC1	146.503	1.39427	0.137857	10.1139	4.79456e-24	6.09532e-23	9.00058	8.95937	8.97411	8.95499	9.4423	9.37191	9.41359	9.41786
ENSG00000082014.17 SMARCD3	319.357	1.11296	0.110106	10.108	5.08889e-24	6.46625e-23	9.4066	9.38037	9.44464	9.29753	9.94006	9.90506	9.80439	9.86885
ENSG00000178467.18 P4HTM	625.362	0.89278	0.0883298	10.1073	5.12548e-24	6.50946e-23	9.89252	9.86243	9.93898	9.8284	10.4965	10.4157	10.2918	10.3743
ENSG00000100280.17 AP1B1	1802.48	0.589012	0.0583013	10.1029	5.36361e-24	6.80847e-23	10.965	10.936	10.9231	11.0203	11.4354	11.4972	11.3742	11.36
ENSG00000128791.12 TWSG1	1643.09	-0.801607	0.0793796	-10.0984	5.61564e-24	7.1248e-23	11.3109	11.2852	11.3554	11.5368	10.6707	10.7622	10.8271	10.8166
ENSG00000104660.19 LEPROTL1	978.522	-0.790987	0.0783319	-10.0979	5.64463e-24	7.158e-23	10.6919	10.8092	10.807	10.9148	10.2328	10.2591	10.3421	10.2893
ENSG00000112996.11 MRPS30	3979.66	-0.572364	0.0567291	-10.0894	6.15269e-24	7.79835e-23	12.2858	12.35	12.4546	12.4402	11.8527	11.841	11.9598	11.8737
ENSG00000240086.7 AC092969.1	43.436	3.81839	0.378462	10.0892	6.165e-24	7.81003e-23	8.45594	8.46499	8.39279	8.39719	9.07109	8.91482	8.96619	8.93551
ENSG00000196449.4 YRDC	1223.59	-0.595831	0.0591517	-10.0729	7.27751e-24	9.21477e-23	10.9906	11.0047	11.025	10.9304	10.5063	10.5738	10.6018	10.5775
ENSG00000232533.1 AC093673.1	149.395	1.35619	0.134639	10.0728	7.28487e-24	9.21946e-23	8.96895	8.99825	9.00104	8.98132	9.39006	9.41773	9.43869	9.42497
ENSG00000197217.13 ENTPD4	1636.23	-0.562203	0.0558288	-10.0701	7.48928e-24	9.47342e-23	11.2932	11.3357	11.2662	11.2963	10.8056	10.8527	10.8864	10.9389
ENSG00000137103.20 TMEM8B	572.882	-0.818973	0.0813528	-10.0669	7.73626e-24	9.78093e-23	10.3215	10.3144	10.2225	10.3355	9.91509	9.84189	9.81723	9.79787
ENSG00000185338.6 SOCS1	77.9561	2.08049	0.206739	10.0634	8.01907e-24	1.01334e-22	8.63389	8.70244	8.73567	8.67336	9.11556	9.15699	9.19053	9.13633
ENSG00000197579.8 TOPORS	1259.25	-0.697004	0.0692855	-10.0599	8.30951e-24	1.04952e-22	11.0298	10.9801	11.1134	11.0678	10.5351	10.4701	10.5478	10.6471
[truncated: 23,259 more rows]

## Sheet: S2- dge CON ut vs CON dNs
Name	baseMean2	log2FoldChange	lfcSE	stat	pvalue	padj	CON_dNs_A	CON_dNs_B	CON_dNs_C	CON_dNs_D	CON_ut_A	CON_ut_B	CON_ut_C	CON_ut_D
ENSG00000068912.14 ERLEC1	1851.85	-2.76278	0.06707	-41.1924	0	0	9.64252	9.7496	9.78831	9.77614	11.8196	11.8188	11.8767	11.819
ENSG00000078747.16 ITCH	2736.28	-2.03866	0.0523301	-38.9578	0	0	10.5114	10.4779	10.5293	10.5802	12.2213	12.2374	12.2407	12.2482
ENSG00000100836.10 PABPN1	6539.87	2.07272	0.0487025	42.5587	0	0	13.4084	13.4093	13.4336	13.4487	11.5981	11.4926	11.4968	11.4765
ENSG00000102755.12 FLT1	5426.3	-3.70547	0.0880185	-42.0988	0	0	10.125	10.1585	10.0813	10.3687	13.2746	13.278	13.371	13.5028
ENSG00000106366.9 SERPINE1	24625.8	-2.0911	0.0507831	-41.1772	0	0	13.2534	13.1756	13.2666	13.3295	15.3015	15.2575	15.3717	15.2638
ENSG00000108821.14 COL1A1	9382.06	2.18104	0.0456926	47.733	0	0	13.8999	13.9531	13.9989	13.9395	11.921	11.9199	11.8461	11.8968
ENSG00000110048.12 OSBP	3405.99	-2.35596	0.0614408	-38.3452	0	0	10.5094	10.4869	10.6039	10.659	12.6123	12.5743	12.5943	12.5417
ENSG00000112473.18 SLC39A7	4521.83	-2.28122	0.0578603	-39.4264	0	0	10.9477	10.853	10.9233	10.9989	13.017	12.9514	12.9634	12.8773
ENSG00000116285.13 ERRFI1	36944.1	-2.68491	0.0567602	-47.3027	0	0	13.2987	13.2439	13.3369	13.473	15.9738	15.9276	16.0052	15.9895
ENSG00000122884.12 P4HA1	4295.44	-2.57978	0.0582809	-44.2646	0	0	10.6036	10.6614	10.6746	10.762	12.8792	12.8965	12.9725	12.9587
ENSG00000131016.17 AKAP12	21452.5	-3.31786	0.0663163	-50.0308	0	0	12.155	12.0341	11.9681	12.1595	15.2349	15.2009	15.2222	15.401
ENSG00000138166.6 DUSP5	4318.32	-2.15507	0.0498547	-43.2271	0	0	10.999	10.9569	10.9042	10.985	12.8609	12.8867	12.8993	12.8292
ENSG00000142949.17 PTPRF	7682.32	-1.84861	0.0487213	-37.9426	0	0	11.8959	11.808	11.894	11.9076	13.5623	13.62	13.5748	13.6596
ENSG00000150961.15 SEC24D	2402.48	-3.02497	0.0617986	-48.9489	0	0	9.84386	9.75154	9.85591	9.85337	12.1931	12.1643	12.2502	12.1906
ENSG00000150995.20 ITPR1	4106.31	-3.02191	0.0665647	-45.3981	0	0	10.4485	10.2727	10.2916	10.3509	12.9442	12.9025	12.834	12.9886
ENSG00000159167.12 STC1	13523.3	-3.14543	0.0722957	-43.5078	0	0	11.591	11.5568	11.5163	11.8276	14.569	14.5721	14.6195	14.6155
ENSG00000162804.14 SNED1	6283.91	2.86229	0.0481808	59.4073	0	0	13.4595	13.5133	13.5013	13.4726	10.8921	10.9518	10.8623	10.9467
ENSG00000164484.12 TMEM200A	1197.75	-3.47011	0.088154	-39.3642	0	0	9.01209	9.08422	9.11597	9.15969	11.2765	11.3263	11.3564	11.4445
ENSG00000166250.12 CLMP	18283.5	-2.33501	0.0538393	-43.3701	0	0	12.646	12.5868	12.6437	12.761	14.8517	14.9034	14.9371	14.9761
ENSG00000166670.10 MMP10	3245.45	-3.53726	0.0771167	-45.8689	0	0	9.78708	9.76884	9.73612	9.93057	12.6475	12.5952	12.7573	12.5724
ENSG00000166923.12 GREM1	1932.68	-2.83781	0.0716151	-39.6259	0	0	9.77334	9.6613	9.76435	9.74822	11.8361	11.8762	11.8653	12.0048
ENSG00000175352.11 NRIP3	3556.29	-2.70973	0.0660608	-41.0188	0	0	10.4233	10.345	10.2966	10.488	12.6873	12.6726	12.757	12.6316
ENSG00000177119.17 ANO6	2637.59	-2.7864	0.0703846	-39.5882	0	0	10.0222	10.0415	10.0622	10.0634	12.2554	12.2753	12.2049	12.442
ENSG00000178726.7 THBD	1947.69	-2.85097	0.0682045	-41.8003	0	0	9.67466	9.73792	9.69944	9.83022	11.8715	11.8969	11.9514	11.9131
ENSG00000179222.18 MAGED1	2832.95	-2.62781	0.0697907	-37.6528	0	0	10.1615	10.174	10.1689	10.3243	12.4113	12.4117	12.3941	12.269
ENSG00000184254.17 ALDH1A3	9771.39	-2.76437	0.0605853	-45.6277	0	0	11.5234	11.4513	11.4541	11.6219	14.0304	14.0599	14.0898	14.1851
ENSG00000186480.13 INSIG1	2023.09	-2.88544	0.0633254	-45.5653	0	0	9.74011	9.71422	9.80104	9.75154	11.9071	11.95	12.016	11.9696
ENSG00000196611.6 MMP1	150130	-2.84667	0.0586413	-48.5438	0	0	15.0663	15.1969	15.2468	15.1974	18.0062	17.9349	18.1266	17.9666
ENSG00000197632.9 SERPINB2	2198.48	-4.43445	0.103166	-42.9835	0	0	9.15811	9.05994	8.9705	9.12638	12.1651	12.0228	12.3642	12.1309
ENSG00000249437.8 NAIP	1019.57	3.04278	0.0800814	37.9962	0	0	11.1808	11.0897	11.107	11.1198	9.21511	9.12744	9.10926	9.18863
ENSG00000250138.4 AC139495.2	1551.76	4.32174	0.104051	41.5346	0	0	11.8038	11.7145	11.6299	11.7341	9.05656	8.89886	8.7869	8.91202
ENSG00000259207.9 ITGB3	3160.46	-2.70033	0.0719594	-37.5257	0	0	10.3062	10.233	10.2251	10.334	12.4333	12.5463	12.4554	12.6647
ENSG00000268089.3 GABRQ	1363.69	-2.90234	0.0776414	-37.3813	7.87189e-306	6.38959e-303	9.42055	9.39268	9.34535	9.53315	11.4611	11.4452	11.4471	11.5012
ENSG00000113161.17 HMGCR	3320	-2.2469	0.0602569	-37.2886	2.511e-304	1.97823e-301	10.5525	10.5606	10.7202	10.5908	12.5127	12.5045	12.5321	12.5671
ENSG00000115758.13 ODC1	6065.21	-2.60355	0.0702103	-37.0821	5.45932e-301	4.1781e-298	10.9786	11.0545	11.0525	11.127	13.3957	13.331	13.5686	13.3106
ENSG00000147202.18 DIAPH2	1839.26	2.83081	0.0764005	37.0522	1.65576e-300	1.23197e-297	11.9389	11.8336	11.7626	11.7887	9.63246	9.67473	9.69401	9.79264
ENSG00000141458.13 NPC1	12177.8	-1.85989	0.050207	-37.0445	2.20239e-300	1.59441e-297	12.4423	12.3989	12.4958	12.552	14.2934	14.2375	14.2687	14.2122
ENSG00000128595.17 CALU	6452.46	-2.63256	0.0726509	-36.2358	1.66594e-287	1.17431e-284	10.9491	11.0418	11.2056	11.2131	13.4595	13.4736	13.5575	13.4869
ENSG00000128591.16 FLNC	2459.56	-2.42257	0.0672632	-36.0162	4.66175e-284	3.20179e-281	10.305	10.0931	10.1441	10.2043	12.1722	12.1682	12.135	12.1576
ENSG00000179820.16 MYADM	3484.43	-2.11214	0.0587002	-35.9818	1.61236e-283	1.07972e-280	10.6813	10.6771	10.7906	10.8247	12.5783	12.5804	12.594	12.5331
ENSG00000143384.14 MCL1	41367.2	-2.0337	0.0566262	-35.9145	1.81705e-282	1.18711e-279	14.0056	13.9869	14.0173	14.0885	15.9427	15.9872	16.0207	16.1614
ENSG00000148248.14 SURF4	5967.21	-2.07721	0.0580584	-35.7779	2.43679e-280	1.55409e-277	11.3091	11.3988	11.4442	11.4466	13.3318	13.2959	13.358	13.2057
ENSG00000125845.7 BMP2	1298.73	-2.73268	0.0764117	-35.7626	4.21569e-280	2.62608e-277	9.39967	9.53901	9.4117	9.51324	11.3474	11.3793	11.3674	11.4455
ENSG00000104419.17 NDRG1	28460	-2.82372	0.0794824	-35.5263	1.92869e-276	1.17413e-273	12.7477	12.8283	12.882	13.0002	15.7213	15.5925	15.7308	15.4062
ENSG00000124762.14 CDKN1A	5019.66	-2.36286	0.0666774	-35.4372	4.5697e-275	2.72009e-272	10.9168	10.9593	10.989	11.1192	13.12	13.0898	13.2004	13.0204
ENSG00000104549.12 SQLE	3478.61	-2.46138	0.0695662	-35.3818	3.25713e-274	1.89664e-271	10.403	10.4542	10.6275	10.5961	12.5891	12.6334	12.6488	12.6271
ENSG00000229833.10 PET100	1357.66	2.40048	0.0680228	35.2894	8.55369e-273	4.87488e-270	11.3922	11.4005	11.4037	11.3991	9.69041	9.68359	9.69621	9.56679
ENSG00000168000.15 BSCL2	699.146	3.45542	0.0979927	35.262	2.24533e-272	1.25299e-269	10.6529	10.7782	10.6887	10.7612	8.79092	8.76861	8.84562	8.79928
ENSG00000102024.18 PLS3	4901.95	-2.42691	0.0688509	-35.2488	3.57973e-272	1.95687e-269	10.8032	10.8985	10.9398	11.0565	13.0403	13.0355	13.1538	13.112
ENSG00000128590.5 DNAJB9	770.765	-3.05433	0.086989	-35.1116	4.4773e-270	2.39858e-267	9.00203	8.94088	9.01066	8.99111	10.7585	10.7755	10.824	10.8457
ENSG00000006459.11 KDM7A	2291.92	-2.60259	0.0742804	-35.0373	6.08172e-269	3.19421e-266	10.0876	9.99584	9.93489	10.0503	12.0642	12.0489	12.0176	12.2214
ENSG00000179119.15 SPTY2D1	1038.51	-2.7052	0.0781733	-34.6052	2.11061e-262	1.08721e-259	9.22833	9.33685	9.31609	9.37282	11.0811	11.0979	11.1178	11.1535
ENSG00000138623.10 SEMA7A	7999.5	-1.8098	0.0523163	-34.5934	3.17394e-262	1.6041e-259	12.0089	11.9191	11.9635	11.9315	13.6542	13.6402	13.7374	13.575
ENSG00000198961.10 PJA2	3479.47	-2.53162	0.0732756	-34.5493	1.46149e-261	7.24955e-259	10.3835	10.5253	10.4692	10.5358	12.5384	12.6054	12.5992	12.7847
ENSG00000116514.17 RNF19B	1280.37	-2.47815	0.0721967	-34.325	3.32796e-258	1.62078e-255	9.51767	9.55044	9.56512	9.65877	11.3604	11.3394	11.3623	11.2877
ENSG00000033170.17 FUT8	4771.53	-1.83503	0.0536826	-34.1829	4.34306e-256	2.07738e-253	11.2083	11.3098	11.342	11.3001	12.8893	12.9355	12.9528	12.9983
ENSG00000101310.17 SEC23B	1904.33	-2.5074	0.0735883	-34.0733	1.83624e-254	8.62904e-252	9.79559	9.94019	9.8507	10.0007	11.8517	11.84	11.8744	11.7851
ENSG00000144136.11 SLC20A1	10015.3	1.65571	0.0488382	33.902	6.22749e-252	2.87603e-249	14.0232	13.8773	13.9041	13.9216	12.3292	12.3544	12.3891	12.3618
ENSG00000196924.19 FLNA	41830.7	-1.98836	0.0586601	-33.8963	7.56185e-252	3.43308e-249	14.0837	13.9484	14.0542	14.2066	16.0626	16.0394	15.9863	16.0599
ENSG00000133657.16 ATP13A3	6466.41	-2.9366	0.0867167	-33.8643	2.23444e-251	9.9753e-249	10.9771	10.8218	10.8284	10.945	13.3926	13.5205	13.4254	13.7704
ENSG00000225339.4 AL354740.1	652.824	4.80647	0.142396	33.7543	9.25583e-250	4.06437e-247	10.835	10.6307	10.6039	10.732	8.48979	8.41537	8.42096	8.32289
ENSG00000161638.11 ITGA5	16920	-1.76602	0.0523215	-33.7532	9.5807e-250	4.13917e-247	12.9794	12.9415	12.954	13.0688	14.7482	14.665	14.7524	14.6235
ENSG00000007392.17 LUC7L	4338.1	2.57518	0.0763122	33.7453	1.25102e-249	5.31901e-247	13.1184	12.9088	12.8796	12.8368	10.768	10.7048	10.69	10.5949
ENSG00000139629.16 GALNT6	1534.39	-1.99636	0.0592643	-33.6857	9.36618e-249	3.92004e-246	10.0165	9.95846	9.95753	9.94633	11.4935	11.4884	11.4658	11.504
ENSG00000174437.17 ATP2A2	6971.2	-1.71238	0.0508659	-33.6646	1.90509e-248	7.85075e-246	11.8133	11.8072	11.8739	11.889	13.4361	13.4367	13.372	13.5119
ENSG00000100934.15 SEC23A	2477.2	-2.52498	0.0750258	-33.6548	2.64804e-248	1.07471e-245	10.0476	10.0615	10.2225	10.2078	12.1366	12.1399	12.1593	12.286
ENSG00000049089.15 COL9A2	2127.64	2.59116	0.0780634	33.193	1.3574e-241	5.42678e-239	12.1434	12.0195	11.8824	11.908	10.0095	9.93885	9.91687	9.95319
ENSG00000169641.13 LUZP1	3069.21	-1.72269	0.0520632	-33.0883	4.3724e-240	1.72234e-237	10.8319	10.8095	10.8774	10.8521	12.318	12.3223	12.2795	12.3849
ENSG00000117143.13 UAP1	1811.43	-2.03369	0.061698	-32.962	2.84351e-238	1.10386e-235	10.0434	10.0797	10.1661	10.137	11.6781	11.7129	11.7404	11.6777
ENSG00000115762.16 PLEKHB2	2851.2	-2.12268	0.0644816	-32.9191	1.17076e-237	4.48001e-235	10.4391	10.4485	10.5707	10.6093	12.2546	12.3157	12.3277	12.3247
ENSG00000140575.13 IQGAP1	4785.28	-2.29008	0.0696824	-32.8645	7.07382e-237	2.66872e-234	10.88	10.9915	10.9561	11.127	12.9635	12.9878	13.0643	13.1077
ENSG00000170961.7 HAS2	3911.13	-2.45617	0.0750441	-32.7297	5.90399e-235	2.19645e-232	10.7022	10.6317	10.5999	10.679	12.6254	12.7221	12.8314	12.9324
ENSG00000204220.12 PFDN6	3161.26	2.32871	0.0712276	32.6939	1.9045e-234	6.98823e-232	12.3118	12.5109	12.5442	12.5277	10.5647	10.4408	10.5288	10.4782
ENSG00000163482.12 STK36	695.217	3.08529	0.0944297	32.6728	3.79691e-234	1.37438e-231	10.7432	10.6839	10.6421	10.6815	8.92171	8.95099	8.96969	8.83073
ENSG00000112902.12 SEMA5A	2179.81	-2.4484	0.0750072	-32.6422	1.03294e-233	3.68912e-231	10.0222	9.99745	10.0667	10.1382	11.943	12.0031	11.9229	12.1384
ENSG00000107341.5 UBE2R2	4375.74	-1.65894	0.0508542	-32.6215	2.03041e-233	7.15613e-231	11.2517	11.3049	11.2646	11.374	12.8046	12.7518	12.8044	12.7929
ENSG00000168615.13 ADAM9	1762.16	-2.5167	0.0771512	-32.6204	2.10949e-233	7.33827e-231	9.74542	9.82852	9.91186	9.81139	11.6831	11.7027	11.7011	11.8661
ENSG00000134853.12 PDGFRA	6467.99	-1.91336	0.0587746	-32.5541	1.82998e-232	6.28434e-230	11.7198	11.5484	11.5416	11.6359	13.3217	13.3575	13.4169	13.4177
ENSG00000101782.15 RIOK3	3534.6	-1.7999	0.0553771	-32.5026	9.81064e-232	3.32643e-229	10.9034	10.9321	11.0018	10.9896	12.4656	12.5103	12.5613	12.5846
ENSG00000100219.16 XBP1	3867.65	-2.01503	0.0620387	-32.4802	2.03138e-231	6.80157e-229	10.8515	10.9649	10.9875	10.8947	12.7109	12.6743	12.7818	12.6055
ENSG00000163814.8 CDCP1	6262.26	-1.65223	0.0510827	-32.3442	1.67591e-229	5.54208e-227	11.754	11.6613	11.7573	11.8216	13.2627	13.2807	13.2567	13.3111
ENSG00000169246.16 NPIPB3	4669.14	3.2852	0.101617	32.3291	2.72732e-229	8.90903e-227	13.4376	13.0674	12.9935	12.9226	10.3685	10.2702	10.2875	10.2972
ENSG00000279753.1 AC011558.1	670.055	3.92564	0.121551	32.2963	7.88699e-229	2.54531e-226	10.6457	10.6216	10.7607	10.7675	8.70128	8.50236	8.66184	8.68389
ENSG00000184584.13 STING1	2502.58	-1.87109	0.0580162	-32.2513	3.37825e-228	1.07726e-225	10.5213	10.5253	10.491	10.5757	12.1165	12.1258	12.1053	12.0031
ENSG00000052802.13 MSMO1	1688.65	-2.7227	0.0845713	-32.1942	2.12835e-227	6.70705e-225	9.62322	9.70622	9.73231	9.66766	11.5543	11.7539	11.6753	11.8467
ENSG00000182827.9 ACBD3	1141.2	-2.84607	0.0884323	-32.1837	2.989e-227	9.30969e-225	9.25521	9.24025	9.34272	9.43229	11.1969	11.1953	11.2464	11.3201
ENSG00000265972.6 TXNIP	16207.5	-2.44733	0.0761091	-32.1555	7.40365e-227	2.27947e-224	12.5394	12.2208	12.333	12.5277	14.7551	14.7562	14.8414	14.7005
ENSG00000091409.15 ITGA6	7201.02	-2.39595	0.0745325	-32.1463	9.94342e-227	3.02664e-224	11.4356	11.316	11.3872	11.4861	13.5074	13.5341	13.5934	13.8007
ENSG00000129315.11 CCNT1	1502.06	-2.12045	0.0659933	-32.1312	1.61495e-226	4.86045e-224	9.91537	9.85736	9.86626	9.90583	11.4292	11.4573	11.4748	11.5647
ENSG00000221978.12 CCNL2	17330.8	2.73155	0.0850526	32.116	2.63435e-226	7.84042e-224	15.1039	14.8857	14.8263	14.7576	12.3813	12.3601	12.2498	12.0971
ENSG00000090581.10 GNPTG	1706.25	1.86669	0.0581447	32.1043	3.84542e-226	1.13191e-223	11.5593	11.6004	11.6357	11.5909	10.1093	10.1198	10.1801	10.1481
ENSG00000127022.16 CANX	22159.3	-2.1653	0.0674751	-32.0903	6.01875e-226	1.75237e-223	12.8815	13.0213	13.1228	13.1757	15.1104	15.1284	15.181	15.2271
ENSG00000149927.18 DOC2A	1658.72	2.54648	0.0793571	32.0888	6.31348e-226	1.81842e-223	11.7986	11.6853	11.5549	11.6198	9.68717	9.80799	9.75818	9.77295
ENSG00000152127.9 MGAT5	1491.57	-2.35043	0.0732969	-32.0672	1.26555e-225	3.60628e-223	9.75946	9.76502	9.67371	9.85031	11.473	11.4959	11.479	11.5831
ENSG00000148358.20 GPR107	2702.89	-1.75933	0.0548916	-32.051	2.12558e-225	5.99323e-223	10.6547	10.6683	10.6324	10.7534	12.1526	12.1834	12.1927	12.1384
ENSG00000067167.8 TRAM1	4955.57	-2.82496	0.0881992	-32.0293	4.26722e-225	1.19064e-222	10.599	10.6256	10.7446	10.7143	12.9743	13.1115	13.106	13.3916
ENSG00000186522.15 SEPTIN10	2575.98	-2.18493	0.0682279	-32.0239	5.0664e-225	1.39906e-222	10.24	10.4195	10.4179	10.4157	12.1377	12.142	12.2142	12.233
ENSG00000150712.11 MTMR12	1657.93	-2.07407	0.0648566	-31.9793	2.11752e-224	5.78774e-222	9.97727	9.96339	10.0063	10.0569	11.5729	11.5866	11.5522	11.6764
ENSG00000101115.13 SALL4	575.414	3.83267	0.120093	31.9141	1.70027e-223	4.60034e-221	10.6027	10.5199	10.4899	10.506	8.6677	8.50816	8.5413	8.67002
ENSG00000069493.15 CLEC2D	739.493	4.29087	0.13454	31.893	3.34294e-223	8.95439e-221	10.9934	10.901	10.6661	10.7224	8.60063	8.54742	8.51318	8.65592
ENSG00000258504.2 AL157871.1	558.946	3.71378	0.116499	31.8783	5.33365e-223	1.41453e-220	10.5331	10.3912	10.506	10.5358	8.57689	8.7044	8.60713	8.59679
ENSG00000135387.21 CAPRIN1	8685.91	-2.09392	0.0657549	-31.8444	1.57582e-222	4.13823e-220	11.7101	11.8237	11.9753	11.9201	13.7764	13.8259	13.8144	13.8791
ENSG00000074695.6 LMAN1	7359.11	-2.54012	0.0798429	-31.814	4.14469e-222	1.07786e-219	11.2523	11.2574	11.3901	11.4155	13.5508	13.6073	13.6065	13.8736
ENSG00000164597.15 COG5	1800.26	-2.17999	0.0688543	-31.6609	5.36119e-220	1.38081e-217	10.0574	9.92167	10.0944	10.0116	11.6804	11.7064	11.6985	11.7878
ENSG00000011638.11 TMEM159	1531.43	-2.07144	0.0655302	-31.6104	2.65837e-219	6.78162e-217	9.86814	9.96175	9.97346	9.91462	11.558	11.4471	11.4962	11.4889
ENSG00000179406.8 LINC00174	978.937	3.09702	0.0980235	31.5946	4.37421e-219	1.10535e-216	11.1307	11.1747	10.998	11.0153	9.16313	9.15553	8.97384	9.14452
ENSG00000134109.11 EDEM1	3182.11	-1.91928	0.0607545	-31.5908	4.93835e-219	1.23625e-216	10.7846	10.7144	10.7669	10.7868	12.3243	12.4304	12.384	12.5134
ENSG00000174780.17 SRP72	4383.45	-2.074	0.0661416	-31.357	7.82091e-216	1.93973e-213	10.8876	11.0069	11.1208	11.1033	12.832	12.8725	12.8999	12.8954
ENSG00000127526.15 SLC35E1	1656.53	-1.96296	0.0626588	-31.3277	1.95589e-215	4.80648e-213	10.0767	10.1124	10.0458	10.0035	11.6201	11.5954	11.5236	11.5683
ENSG00000149428.19 HYOU1	9847.6	-2.16202	0.0690917	-31.292	5.98836e-215	1.45822e-212	11.9022	11.8233	12.0428	12.1058	14.0336	14.0256	14.0435	13.9468
ENSG00000152661.9 GJA1	10499.1	-2.69904	0.0862742	-31.2844	7.60576e-215	1.83539e-212	11.5073	11.5516	11.752	11.7841	14.047	14.1906	14.1203	14.3637
ENSG00000078549.15 ADCYAP1R1	626.844	-3.05022	0.0978759	-31.1642	3.26144e-213	7.80009e-211	8.88396	8.90463	8.78156	8.91772	10.5195	10.6032	10.5646	10.6011
ENSG00000127152.18 BCL11B	1780.75	-2.78405	0.0894424	-31.1268	1.04564e-212	2.47864e-210	9.70781	9.57521	9.64335	9.83798	11.7596	11.7121	11.7674	11.8997
ENSG00000135926.15 TMBIM1	2056.88	-2.15974	0.0694716	-31.0881	3.49091e-212	8.20241e-210	10.0808	10.1684	10.1579	10.2368	11.9248	11.8675	11.9557	11.7897
ENSG00000135631.17 RAB11FIP5	1429.48	-2.06929	0.0665723	-31.0833	4.04654e-212	9.42526e-210	9.81076	9.93349	9.86798	9.85948	11.4548	11.4101	11.4299	11.354
ENSG00000091651.9 ORC6	1842.51	1.93729	0.0623268	31.0828	4.10902e-212	9.4883e-210	11.6891	11.7636	11.6438	11.7282	10.2053	10.1983	10.1906	10.109
ENSG00000096696.14 DSP	1803.65	-2.31132	0.0743684	-31.0793	4.58224e-212	1.04906e-209	9.88882	9.93349	9.95913	10.0318	11.7131	11.6843	11.6934	11.8668
ENSG00000175265.17 GOLGA8A	11166.6	2.94116	0.0946423	31.0766	4.98875e-212	1.13245e-209	14.5554	14.3105	14.1459	14.1557	11.7083	11.5508	11.4397	11.4721
ENSG00000085449.15 WDFY1	2704.42	-2.46264	0.0794973	-30.9777	1.07691e-210	2.42404e-208	10.1768	10.1921	10.2978	10.3666	12.188	12.2717	12.253	12.4317
ENSG00000232573.1 RPL3P4	7200.34	2.3432	0.0756551	30.9722	1.27622e-210	2.84875e-208	13.5033	13.6525	13.6614	13.598	11.5434	11.2428	11.495	11.4822
ENSG00000136379.12 ABHD17C	1953.36	-2.04206	0.0659662	-30.9562	2.0941e-210	4.63575e-208	10.1011	10.1094	10.2433	10.2447	11.7786	11.8071	11.7868	11.8265
ENSG00000188599.17 NPIPP1	785.777	2.77543	0.0898729	30.8818	2.09936e-209	4.60929e-207	10.8838	10.8218	10.6822	10.7952	9.10852	9.09859	9.07236	9.12177
ENSG00000059804.16 SLC2A3	6120.21	-2.02602	0.06571	-30.8328	9.53438e-209	2.07632e-206	11.3035	11.4846	11.536	11.5326	13.3655	13.2852	13.3608	13.2842
ENSG00000166233.15 ARIH1	2333.25	-1.77639	0.0576565	-30.8099	1.93154e-208	4.17243e-206	10.4783	10.5199	10.4823	10.5523	11.9152	11.9721	11.982	12.0424
ENSG00000152291.14 TGOLN2	3077.65	-2.31389	0.075159	-30.7866	3.96255e-208	8.49127e-206	10.3835	10.4393	10.466	10.6343	12.3742	12.4346	12.4147	12.5269
ENSG00000172878.14 METAP1D	839.696	2.83771	0.0922361	30.7657	7.54844e-208	1.6047e-205	10.9389	10.78	10.9398	10.8499	9.05093	9.09859	9.13434	9.19133
ENSG00000125538.12 IL1B	9062.01	-2.02967	0.0659727	-30.7653	7.63429e-208	1.61017e-205	11.9715	11.8194	11.9358	12.1043	13.8233	13.8576	13.927	13.8775
ENSG00000213339.9 QTRT1	743.596	2.54509	0.0829212	30.6928	7.09192e-207	1.4841e-204	10.7739	10.6693	10.7174	10.6815	9.17323	9.1583	9.17261	9.11021
ENSG00000268941.2 LINC01711	451.386	4.70981	0.153541	30.6746	1.24093e-206	2.57672e-204	10.2131	10.3301	10.349	10.335	8.32158	8.28922	8.24826	8.41684
ENSG00000163297.18 ANTXR2	3748.53	-2.16191	0.0705786	-30.6313	4.69283e-206	9.6694e-204	10.6681	10.7554	10.8519	10.8962	12.6073	12.671	12.6653	12.7661
ENSG00000095139.14 ARCN1	6627.4	-2.18345	0.0713482	-30.6027	1.12731e-205	2.30504e-203	11.2944	11.4173	11.5001	11.5952	13.4407	13.4609	13.5303	13.4191
ENSG00000112972.15 HMGCS1	2165.09	-1.7393	0.0568429	-30.5985	1.28256e-205	2.60263e-203	10.4286	10.4184	10.4823	10.4708	11.8137	11.8862	11.8708	11.9251
ENSG00000180398.13 MCFD2	4071.29	-2.01413	0.0658399	-30.5913	1.59574e-205	3.2138e-203	10.9094	10.9051	11.0299	11.0873	12.6883	12.7384	12.8006	12.8245
ENSG00000081181.8 ARG2	8592.08	-2.13151	0.0697329	-30.5668	3.37982e-205	6.75611e-203	11.7437	11.7865	11.7947	11.9452	13.8767	13.7642	13.9235	13.6883
ENSG00000133103.17 COG6	1053.3	-2.20639	0.0722283	-30.5474	6.11793e-205	1.21389e-202	9.48762	9.57074	9.57815	9.54102	11.0595	11.0709	11.1201	11.0127
ENSG00000181222.19 POLR2A	9473.95	-2.2562	0.0739532	-30.5085	2.00901e-204	3.95687e-202	11.9926	11.7183	11.7735	11.9146	14.0731	14.0088	13.8772	13.9327
ENSG00000100288.20 CHKB	1406.68	2.25413	0.0740105	30.4568	9.72492e-204	1.9014e-201	11.5171	11.4098	11.4031	11.352	9.7566	9.82073	9.78296	9.68391
ENSG00000115648.14 MLPH	10479.3	2.80652	0.0924811	30.347	2.75372e-202	5.34502e-200	14.4391	14.1923	14.0671	14.0519	11.6914	11.6356	11.5236	11.4133
ENSG00000266340.1 AC138207.7	1130.76	2.95105	0.0972877	30.3333	4.17727e-202	8.04982e-200	11.254	11.2734	11.14	11.285	9.34505	9.16656	9.37799	9.1805
ENSG00000124151.19 NCOA3	2918.82	-1.96289	0.064774	-30.3037	1.02454e-201	1.96024e-199	10.6484	10.5795	10.6019	10.7288	12.2472	12.3146	12.2627	12.4038
ENSG00000137868.19 STRA6	3335.02	2.11577	0.0698733	30.28	2.1011e-201	3.99148e-199	12.625	12.4646	12.4419	12.5145	10.5847	10.6966	10.7024	10.7877
ENSG00000164244.21 PRRC1	1692.81	-2.52572	0.0835347	-30.2355	8.08475e-201	1.52506e-198	9.71867	9.70823	9.87994	9.82554	11.6426	11.6454	11.6321	11.8325
ENSG00000198792.13 TMEM184B	1986.3	-2.04178	0.0677924	-30.1182	2.80125e-199	5.24716e-197	10.277	10.0842	10.1648	10.2368	11.8175	11.8664	11.8087	11.7916
ENSG00000244405.8 ETV5	3032.9	-1.78852	0.059437	-30.091	6.36006e-199	1.18306e-196	10.728	10.7248	10.8301	10.8682	12.2713	12.3446	12.3386	12.3436
ENSG00000115806.13 GORASP2	3740.99	-1.869	0.0624399	-29.9328	7.37732e-197	1.36282e-194	10.87	10.9649	11.0336	11.0438	12.6015	12.6486	12.6799	12.5529
ENSG00000138757.15 G3BP2	2731.58	-2.51975	0.0842062	-29.9236	9.70454e-197	1.78045e-194	10.1118	10.2004	10.2778	10.3467	12.2325	12.2405	12.2815	12.4722
ENSG00000104341.17 LAPTM4B	3681.01	-2.46917	0.0826014	-29.8926	2.45434e-196	4.47224e-194	10.3879	10.5899	10.6613	10.6615	12.5909	12.6737	12.7455	12.7906
ENSG00000147454.14 SLC25A37	14241.6	1.41939	0.0474955	29.8848	3.09789e-196	5.60676e-194	14.452	14.353	14.3482	14.3209	13.022	13.016	13.0075	12.945
ENSG00000141367.12 CLTC	7405.26	-1.94559	0.0651639	-29.8569	7.13946e-196	1.28347e-193	11.6107	11.7313	11.8423	11.8517	13.5327	13.5671	13.5613	13.6304
ENSG00000196878.15 LAMB3	2381.47	-2.34282	0.0784745	-29.8545	7.67266e-196	1.37013e-193	10.3062	10.063	10.1343	10.2917	12.1531	12.1215	12.0714	12.0701
ENSG00000001630.17 CYP51A1	2111.39	-2.18399	0.0732076	-29.8328	1.46909e-195	2.60603e-193	10.1969	10.1299	10.1468	10.2206	11.8099	11.8646	11.9638	12.0443
ENSG00000069956.13 MAPK6	1782.21	-2.03158	0.0682662	-29.7596	1.30222e-194	2.29482e-192	10.093	10.0523	10.0622	10.159	11.5856	11.6677	11.7128	11.7554
ENSG00000147649.10 MTDH	4315.5	-2.34699	0.0789221	-29.738	2.47747e-194	4.33735e-192	10.7254	10.7944	10.9623	10.8484	12.8042	12.8446	12.8715	13.0643
ENSG00000276550.4 HERC2P2	4226.74	2.44081	0.0821487	29.7121	5.35486e-194	9.31397e-192	13.085	12.8846	12.7549	12.7949	10.7372	10.8487	10.7431	10.6656
ENSG00000070669.17 ASNS	2486.43	1.8916	0.0636919	29.6993	7.84546e-194	1.3558e-191	11.9701	12.098	12.1231	12.1389	10.5697	10.5088	10.4956	10.4625
ENSG00000133961.20 NUMB	9284.38	-1.2413	0.0418419	-29.6665	2.076e-193	3.5646e-191	12.5558	12.5314	12.4958	12.5671	13.7219	13.7361	13.7353	13.6806
ENSG00000165732.13 DDX21	4392.49	-2.29952	0.0775454	-29.6539	3.02253e-193	5.15678e-191	10.7549	10.813	10.97	10.9936	12.8621	12.8716	12.876	13.0476
ENSG00000168621.15 GDNF	1615.32	-1.79458	0.0605263	-29.6496	3.42883e-193	5.81295e-191	10.1395	10.0842	10.0915	10.1747	11.5584	11.4945	11.5167	11.4903
ENSG00000114019.15 AMOTL2	1165.44	-2.04998	0.0692136	-29.6181	8.72575e-193	1.46999e-190	9.71506	9.63184	9.67371	9.76963	11.1628	11.1731	11.1743	11.1402
ENSG00000159921.20 GNE	1001.66	-2.12333	0.0717272	-29.6028	1.37506e-192	2.30201e-190	9.57563	9.51583	9.58676	9.48891	10.967	10.9893	10.9917	11.0318
ENSG00000120458.13 MSANTD2	2710.19	2.59393	0.0876791	29.5844	2.37409e-192	3.94983e-190	12.5175	12.3086	12.2011	12.1857	10.2129	10.2497	10.1861	10.0884
ENSG00000239704.11 CDRT4	1108.97	2.85015	0.0967324	29.4642	8.27208e-191	1.36775e-188	11.3675	11.1339	11.1722	11.1367	9.29665	9.19634	9.38933	9.31367
ENSG00000115310.18 RTN4	12226.6	-1.87543	0.0637539	-29.4167	3.35986e-190	5.52131e-188	12.3215	12.4953	12.5543	12.4891	14.1626	14.2555	14.2949	14.3302
ENSG00000116016.14 EPAS1	4414.26	-1.76319	0.0599483	-29.4119	3.87254e-190	6.32499e-188	11.1647	11.1977	11.2905	11.315	12.7781	12.7846	12.8202	12.9072
ENSG00000215252.11 GOLGA8B	5579.06	2.60476	0.0886786	29.373	1.21528e-189	1.97288e-187	13.5164	13.3183	13.1648	13.126	10.9745	11.0472	10.8475	10.946
ENSG00000085063.17 CD59	9166.15	-1.30295	0.0443641	-29.3694	1.34913e-189	2.17698e-187	12.4638	12.4676	12.4633	12.5248	13.7268	13.7251	13.759	13.6604
ENSG00000150093.20 ITGB1	13853.1	-2.01804	0.0687208	-29.3658	1.50017e-189	2.40619e-187	12.4024	12.5279	12.5939	12.5864	14.3752	14.3875	14.4808	14.6134
ENSG00000134531.10 EMP1	6651.85	-1.77166	0.0603665	-29.3484	2.50761e-189	3.99814e-187	11.6809	11.6924	11.846	11.7588	13.3343	13.3334	13.3981	13.4816
ENSG00000198363.18 ASPH	6696.33	-2.18274	0.074376	-29.3473	2.58309e-189	4.09412e-187	11.3491	11.4463	11.5169	11.5569	13.3846	13.4123	13.4512	13.647
ENSG00000163191.6 S100A11	31834	1.97663	0.0673691	29.3403	3.17952e-189	5.00981e-187	15.4916	15.6359	15.6967	15.7395	13.7837	13.6661	13.7675	13.5838
ENSG00000108417.4 KRT37	482.547	-3.97015	0.135463	-29.3081	8.18027e-189	1.28139e-186	8.53746	8.53121	8.4173	8.51004	10.4207	10.3341	10.4243	10.2147
ENSG00000132780.17 NASP	6905.51	1.40566	0.0480093	29.2788	1.92869e-188	3.00359e-186	13.3056	13.3546	13.3882	13.3594	12.0801	11.9677	12.0367	12.0686
ENSG00000198959.12 TGM2	1028.01	-2.52585	0.0862998	-29.2684	2.62295e-188	4.06118e-186	9.44783	9.3259	9.27215	9.47449	11.05	11.0772	11.0969	11.0977
ENSG00000128567.17 PODXL	2814.07	-1.96266	0.0671408	-29.232	7.61493e-188	1.17226e-185	10.697	10.5383	10.5039	10.6556	12.2423	12.253	12.2185	12.3241
ENSG00000172572.7 PDE3A	1651.93	-2.57764	0.0882555	-29.2066	1.60078e-187	2.4502e-185	9.79898	9.6921	9.66367	9.78746	11.5539	11.6497	11.6029	11.8426
ENSG00000131791.8 PRKAB2	2006.93	-1.6145	0.055295	-29.198	2.05425e-187	3.12643e-185	10.4762	10.4207	10.4538	10.4086	11.7386	11.7381	11.7269	11.7997
ENSG00000058668.15 ATP2B4	2411.79	-1.93854	0.0664348	-29.1796	3.5161e-187	5.32103e-185	10.5477	10.43	10.3868	10.4316	12.0186	12.0623	11.987	12.1399
ENSG00000115170.15 ACVR1	1582.52	-1.67666	0.0574804	-29.1692	4.76911e-187	7.1767e-185	10.1408	10.1371	10.204	10.1759	11.4584	11.4466	11.4909	11.4688
ENSG00000013375.16 PGM3	1933.64	-1.65047	0.0566116	-29.1543	7.36994e-187	1.10286e-184	10.4264	10.3622	10.3237	10.4086	11.6959	11.6966	11.7359	11.7187
ENSG00000167157.11 PRRX2	3845.24	2.0406	0.0700216	29.1424	1.04356e-186	1.55294e-184	12.5465	12.6839	12.7358	12.7877	10.849	10.8367	10.9782	10.9432
ENSG00000113615.13 SEC24A	933.978	-2.88569	0.0993172	-29.0552	1.3212e-185	1.95523e-183	9.0673	9.1442	9.18479	9.26635	10.9556	10.9778	10.9421	11.1421
ENSG00000132824.14 SERINC3	5564.27	-1.46374	0.0504218	-29.0299	2.75994e-185	4.06197e-183	11.6999	11.7099	11.7626	11.7219	13.0145	13.0473	13.0604	13.1526
ENSG00000206567.10 AC022007.1	497.846	3.36833	0.116088	29.0152	4.227e-185	6.18713e-183	10.418	10.3959	10.2651	10.3233	8.73354	8.67265	8.65595	8.59679
ENSG00000085733.16 CTTN	5321.06	1.87354	0.0646023	29.0011	6.3724e-185	9.2767e-183	13.21	13.1245	13.0845	12.9787	11.4734	11.393	11.3202	11.4002
ENSG00000035403.18 VCL	3768.48	-1.6634	0.0574186	-28.9696	1.58804e-184	2.29931e-182	11.0977	11.0597	11.0959	11.2114	12.5288	12.5809	12.5978	12.6419
ENSG00000068878.15 PSME4	3248.75	-1.75762	0.060691	-28.9601	2.09376e-184	3.01523e-182	10.9161	10.8323	10.8351	10.9567	12.3641	12.3775	12.3925	12.5008
ENSG00000185650.10 ZFP36L1	16966.9	-1.64677	0.0568846	-28.9493	2.86058e-184	4.09751e-182	13.2046	13.0204	12.9759	13.0977	14.6829	14.6913	14.6542	14.6703
ENSG00000179889.19 PDXDC1	2922.27	-1.78184	0.0617001	-28.8791	2.18565e-183	3.11408e-181	10.787	10.7069	10.6642	10.8403	12.3199	12.2563	12.2859	12.2339
ENSG00000072110.15 ACTN1	21233.8	-1.35583	0.0469503	-28.878	2.25486e-183	3.19569e-181	13.5629	13.5309	13.5949	13.6811	14.9461	14.9007	14.9271	14.9001
ENSG00000170873.19 MTSS1	5978.53	-1.63863	0.056821	-28.8385	7.05926e-183	9.95207e-181	11.7474	11.6135	11.6796	11.7549	13.1689	13.1962	13.175	13.2993
ENSG00000110917.8 MLEC	5004.83	-1.43857	0.0499002	-28.829	9.28613e-183	1.30229e-180	11.5474	11.5821	11.614	11.6775	12.904	12.9074	12.9032	12.9581
ENSG00000132199.20 ENOSF1	3446.65	1.90052	0.0660085	28.7921	2.69299e-182	3.75701e-180	12.6491	12.5311	12.4514	12.429	10.8462	10.9218	10.8193	10.8724
ENSG00000106333.13 PCOLCE	7175.24	1.77974	0.0618335	28.7828	3.52023e-182	4.88564e-180	13.3912	13.48	13.5477	13.5548	11.9015	11.8162	11.8942	11.7308
ENSG00000245532.9 NEAT1	4080.21	2.61282	0.0907833	28.7808	3.72682e-182	5.1457e-180	13.0153	12.8881	12.6816	12.8423	10.6133	10.7317	10.4192	10.6109
ENSG00000158092.7 NCK1	1015.59	-2.01113	0.0699326	-28.7581	7.17355e-182	9.85388e-180	9.57563	9.61469	9.63513	9.5891	10.9512	10.9791	10.9942	11.0487
ENSG00000203896.10 LIME1	794.483	2.92263	0.101697	28.7387	1.25355e-181	1.71314e-179	10.9116	10.7116	10.8485	10.8172	9.00773	9.17204	9.01042	9.00959
ENSG00000121716.20 PILRB	1401.68	2.71884	0.0946583	28.7226	1.98978e-181	2.70549e-179	11.5785	11.4299	11.4048	11.494	9.5946	9.64229	9.37229	9.49655
ENSG00000188234.14 AGAP4	785.408	2.61168	0.0909575	28.7131	2.61566e-181	3.53853e-179	10.9026	10.736	10.7293	10.7447	9.14524	9.21749	9.10926	9.17504
ENSG00000130164.14 LDLR	3198.84	-1.70204	0.0594328	-28.638	2.26136e-180	3.04385e-178	10.9793	10.7962	10.8807	10.9457	12.3738	12.4094	12.3722	12.3533
ENSG00000131051.24 RBM39	11092.8	1.90808	0.0667009	28.6065	5.57202e-180	7.46261e-178	14.3061	14.1047	14.0504	14.0499	12.3479	12.3339	12.336	12.2372
ENSG00000172292.15 CERS6	1303.97	-2.5118	0.0878153	-28.6032	6.12457e-180	8.16183e-178	9.5614	9.48981	9.62893	9.60782	11.2218	11.3463	11.3771	11.4983
ENSG00000138434.17 ITPRID2	4724.22	-1.8188	0.0637561	-28.5275	5.34796e-179	7.09161e-177	11.3408	11.2037	11.2671	11.3401	12.8505	12.8975	12.905	13.0496
ENSG00000254452.1 AP001107.2	699.324	7.32365	0.257144	28.4807	2.03133e-178	2.68035e-176	10.6795	10.7827	10.8701	10.9082	8.13856	7.99669	8.0449	7.99722
ENSG00000168495.13 POLR3D	1725.29	-2.05822	0.0722785	-28.4762	2.30675e-178	3.02885e-176	10.0532	9.92336	10.0578	10.1443	11.6747	11.6744	11.6007	11.6303
ENSG00000166446.15 CDYL2	2423.69	-2.43779	0.0856613	-28.4584	3.83295e-178	5.00826e-176	10.1994	10.0006	10.1202	10.3211	12.1457	12.123	12.0816	12.2117
ENSG00000116406.19 EDEM3	1610.93	-2.55137	0.0896801	-28.4496	4.92401e-178	6.40264e-176	9.74542	9.78025	9.65761	9.73151	11.5367	11.6046	11.5323	11.8307
ENSG00000147650.12 LRP12	1285.61	-2.31807	0.0815702	-28.4181	1.20729e-177	1.56224e-175	9.66341	9.52516	9.70725	9.70944	11.2765	11.2772	11.3129	11.4138
ENSG00000163961.4 RNF168	1589.05	-1.85692	0.0654071	-28.3901	2.67793e-177	3.44861e-175	10.0848	10.0661	10.0232	10.1233	11.5069	11.4578	11.47	11.5879
ENSG00000138768.15 USO1	3803.94	-1.80961	0.0637589	-28.382	3.36835e-177	4.31697e-175	10.9404	10.9977	11.0626	11.1385	12.5826	12.6091	12.6219	12.7108
ENSG00000101577.10 LPIN2	3797.24	-1.55025	0.0546529	-28.3654	5.40419e-177	6.89318e-175	11.1509	11.1733	11.2121	11.2501	12.521	12.5716	12.5415	12.6504
ENSG00000145050.19 MANF	2520.34	-1.9521	0.068934	-28.3184	2.05341e-176	2.60676e-174	10.3781	10.5243	10.5177	10.5312	12.1883	12.0849	12.1571	12.0156
ENSG00000008128.23 CDK11A	2026.86	1.74684	0.0618537	28.2415	1.81015e-175	2.28711e-173	11.8862	11.7437	11.7713	11.7599	10.3963	10.3734	10.4103	10.3291
ENSG00000086598.11 TMED2	4385.14	-2.21744	0.0786106	-28.2079	4.68115e-175	5.88682e-173	10.7565	10.901	11.0554	11.0232	12.8633	12.8428	12.9048	12.9876
ENSG00000156675.16 RAB11FIP1	426.175	-3.09072	0.109638	-28.1903	7.69111e-175	9.62682e-173	8.63509	8.64455	8.69016	8.72575	10.1688	10.1694	10.1786	10.1885
ENSG00000204592.9 HLA-E	5011.49	-1.54981	0.0550099	-28.1733	1.2408e-174	1.53871e-172	11.5152	11.4874	11.5122	11.6266	12.9751	12.9266	12.9998	12.887
ENSG00000071537.14 SEL1L	2595.59	-2.46002	0.0873171	-28.1734	1.23735e-174	1.53871e-172	10.1944	10.1428	10.2575	10.2851	12.1177	12.2036	12.1392	12.4514
ENSG00000065135.12 GNAI3	2430.03	-1.98689	0.0705842	-28.1492	2.44852e-174	3.0224e-172	10.2946	10.453	10.5145	10.4504	12.0297	12.0218	12.0945	12.1378
ENSG00000006607.14 FARP2	11514.1	1.10846	0.0394855	28.0725	2.1237e-173	2.60942e-171	13.9555	13.9615	13.9922	14.0122	12.9401	12.8922	12.9081	12.9205
ENSG00000223959.8 AFG3L1P	1008.55	2.78384	0.0993156	28.0303	6.95422e-173	8.50574e-171	11.2558	11.0411	11.0647	10.9689	9.31228	9.30074	9.26121	9.16404
ENSG00000158195.11 WASF2	5467.3	-1.82987	0.065392	-27.9831	2.60739e-172	3.17462e-170	11.3292	11.4406	11.4546	11.6047	13.1514	13.1341	13.1122	13.1218
ENSG00000159399.10 HK2	2624.89	-1.65049	0.0590094	-27.9699	3.77643e-172	4.57717e-170	10.6609	10.679	10.684	10.8089	12.0718	12.0911	12.1176	12.1402
ENSG00000221914.11 PPP2R2A	1884.04	-1.65303	0.0591611	-27.9412	8.42213e-172	1.01619e-169	10.2817	10.3634	10.4179	10.3467	11.6496	11.6859	11.7036	11.6773
ENSG00000133872.14 SARAF	2931.67	-2.0262	0.0725355	-27.934	1.03227e-171	1.23992e-169	10.5321	10.5177	10.7101	10.6607	12.2794	12.2635	12.3211	12.4329
ENSG00000184787.19 UBE2G2	2568.33	1.62879	0.0583677	27.9056	2.28057e-171	2.72712e-169	12.1519	12.0289	12.0557	12.0494	10.7238	10.7374	10.6282	10.6992
ENSG00000158615.9 PPP1R15B	1828.38	-1.91016	0.0684661	-27.8994	2.71187e-171	3.22845e-169	10.093	10.2154	10.2172	10.2055	11.643	11.7048	11.6337	11.782
ENSG00000260517.3 AC009093.2	907.278	2.78383	0.09986	27.8774	5.02081e-171	5.95077e-169	11.1427	10.9199	10.9288	10.8418	9.2319	9.13028	9.19293	9.20206
ENSG00000244398.1 AC116533.1	3402.52	1.49639	0.0536813	27.8754	5.30625e-171	6.26138e-169	12.4131	12.4468	12.3348	12.4507	11.1257	11.076	11.1377	11.0584
ENSG00000144747.17 TMF1	1860.29	-2.01826	0.0724075	-27.8736	5.57999e-171	6.55551e-169	10.1653	10.1035	10.074	10.2171	11.7042	11.6403	11.7478	11.8355
ENSG00000139926.16 FRMD6	3851.65	-1.6919	0.0608127	-27.8215	2.38437e-170	2.78898e-168	11.0553	11.0729	11.1541	11.2142	12.5752	12.6074	12.603	12.7051
ENSG00000169926.11 KLF13	3154.46	-1.93781	0.0696952	-27.804	3.8788e-170	4.51728e-168	10.6918	10.6115	10.7993	10.8536	12.4042	12.3987	12.3661	12.4563
ENSG00000073712.15 FERMT2	3352.53	-1.75607	0.0631967	-27.7873	6.17699e-170	7.16263e-168	10.7992	10.9207	11.0033	10.9628	12.4191	12.4171	12.5056	12.4614
ENSG00000243708.11 PLA2G4B	643.977	3.16469	0.113981	27.765	1.14856e-169	1.32609e-167	10.7943	10.5361	10.5625	10.5321	8.88904	8.86983	8.85034	8.79125
ENSG00000145623.13 OSMR	6297.38	-1.41137	0.0508576	-27.7514	1.67768e-169	1.92868e-167	11.9236	11.8413	11.9307	11.9644	13.207	13.1833	13.2206	13.2925
ENSG00000136240.10 KDELR2	6455.51	-1.57681	0.0568264	-27.7478	1.85413e-169	2.12242e-167	11.7274	11.8486	11.9249	11.8488	13.2634	13.2875	13.2954	13.36
ENSG00000067064.12 IDI1	1455.95	-2.10362	0.0758223	-27.7441	2.05196e-169	2.33888e-167	9.85525	9.84842	9.87312	9.89106	11.3237	11.4255	11.4348	11.5697
ENSG00000221944.9 TIGD1	880.914	1.9668	0.071045	27.6839	1.09065e-168	1.23789e-166	10.8476	10.8401	10.8258	10.7799	9.53919	9.49916	9.48411	9.51296
ENSG00000169213.7 RAB3B	1077.51	-2.64235	0.0954894	-27.6717	1.53191e-168	1.73138e-166	9.52401	9.29241	9.2833	9.3546	11.1234	11.1287	11.1155	11.2285
ENSG00000134250.20 NOTCH2	5560.32	-2.0114	0.072927	-27.581	1.88283e-167	2.11905e-165	11.3858	11.3105	11.3255	11.4125	13.0949	13.1768	13.0884	13.3777
ENSG00000102158.20 MAGT1	1644.63	-2.29682	0.083349	-27.5566	3.68688e-167	4.13208e-165	9.72047	9.91316	9.98449	9.88211	11.6037	11.5848	11.5941	11.7037
ENSG00000184432.11 COPB2	6215.04	-1.61131	0.0585089	-27.5396	5.89806e-167	6.58273e-165	11.6779	11.7446	11.7635	11.8766	13.288	13.2501	13.2996	13.1916
ENSG00000134901.13 POGLUT2	1389.29	-2.14894	0.0780745	-27.5243	8.99269e-167	9.99495e-165	9.73122	9.77265	9.81005	9.88957	11.3689	11.341	11.5073	11.3393
ENSG00000125484.12 GTF3C4	1191.55	-2.0004	0.0727428	-27.4997	1.77164e-166	1.96095e-164	9.6895	9.70422	9.7456	9.82241	11.1341	11.2052	11.1452	11.2365
ENSG00000079739.17 PGM1	2320.53	-2.09036	0.0760339	-27.4924	2.1641e-166	2.3855e-164	10.2019	10.3049	10.3961	10.379	12.0922	12.0047	12.1022	11.9131
ENSG00000106133.18 NSUN5P2	435.579	3.79439	0.138102	27.4754	3.4579e-166	3.79604e-164	10.2992	10.2882	10.2407	10.1233	8.60528	8.50816	8.44528	8.43655
ENSG00000166548.17 TK2	1155.26	2.08857	0.0760364	27.468	4.23163e-166	4.62647e-164	11.2663	11.1402	11.0909	11.1276	9.68229	9.69415	9.70928	9.61084
ENSG00000144597.14 EAF1	1133.15	-2.01238	0.0733805	-27.4239	1.42295e-165	1.5494e-163	9.66717	9.63609	9.72273	9.74323	11.0636	11.1988	11.1308	11.0952
ENSG00000118257.17 NRP2	6733.8	-1.50747	0.0549977	-27.4096	2.10569e-165	2.28353e-163	11.9078	11.9003	11.9056	12.0383	13.3131	13.3478	13.2954	13.4147
ENSG00000008256.16 CYTH3	2140	-1.589	0.0580539	-27.3711	6.05193e-165	6.53657e-163	10.4934	10.5123	10.4942	10.5864	11.8182	11.8642	11.7674	11.8581
ENSG00000112078.14 KCTD20	2178.37	-1.57119	0.0574095	-27.3681	6.57833e-165	7.07659e-163	10.5184	10.5035	10.6098	10.5694	11.8206	11.8289	11.9031	11.8314
ENSG00000169499.15 PLEKHA2	944.62	-2.03538	0.0744563	-27.3366	1.55859e-164	1.66993e-162	9.4723	9.4922	9.59744	9.57201	10.8947	10.9076	10.9104	10.9425
ENSG00000110841.14 PPFIBP1	6596.5	-1.39748	0.0511231	-27.3356	1.60227e-164	1.70989e-162	11.9526	12.0251	11.9451	12.0152	13.2534	13.2606	13.2562	13.3732
ENSG00000159658.15 EFCAB14	2761.24	-1.57926	0.057787	-27.3289	1.92171e-164	2.04265e-162	10.7565	10.7646	10.8535	10.8558	12.1263	12.1507	12.1176	12.2254
ENSG00000215183.5 MSMP	1210.2	3.98203	0.145943	27.2849	6.41635e-164	6.79322e-162	10.9331	11.4184	11.6342	11.5029	8.92171	8.92005	8.90968	8.88327
ENSG00000138069.18 RAB1A	3028.73	-1.67482	0.0614466	-27.2565	1.38998e-163	1.46583e-161	10.7448	10.8624	10.9437	10.8689	12.2676	12.2695	12.3297	12.3268
ENSG00000266472.6 MRPS21	5216.85	1.64113	0.0602772	27.2263	3.17152e-163	3.33147e-161	12.914	13.0711	13.0395	13.0661	11.5717	11.5243	11.5786	11.4312
ENSG00000152894.15 PTPRK	1667.69	-2.22757	0.0820166	-27.1601	1.92654e-162	2.0158e-160	9.84059	9.83035	9.97187	10.049	11.6197	11.6059	11.5747	11.715
ENSG00000145649.8 GZMA	1227.67	2.84149	0.10463	27.1574	2.06816e-162	2.15555e-160	11.0938	11.435	11.473	11.2802	9.38527	9.30317	9.42816	9.38621
ENSG00000198911.12 SREBF2	6045.54	-1.31299	0.0483512	-27.1552	2.19724e-162	2.28121e-160	11.9335	11.8554	11.9377	11.9768	13.1622	13.1728	13.0979	13.1415
ENSG00000106976.21 DNM1	3600.79	2.39921	0.0884155	27.1356	3.74161e-162	3.86961e-160	12.867	12.6698	12.5342	12.5536	10.6974	10.6477	10.4751	10.5668
ENSG00000133789.15 SWAP70	1548.09	-1.93082	0.071159	-27.1339	3.92516e-162	4.04382e-160	9.94291	10.0165	9.9782	10.1032	11.4571	11.4364	11.4879	11.5661
ENSG00000118985.16 ELL2	4127.21	-1.89853	0.0700166	-27.1154	6.47629e-162	6.62114e-160	11.0997	10.9884	11.0409	11.1675	12.6917	12.7022	12.7323	12.9041
ENSG00000113594.10 LIFR	1272.13	-2.70694	0.0998301	-27.1155	6.46749e-162	6.62114e-160	9.46346	9.39268	9.50241	9.49096	11.2239	11.3263	11.2728	11.579
ENSG00000164466.13 SFXN1	3281.68	-1.52626	0.0563993	-27.0616	2.78921e-161	2.84075e-159	10.9714	11.0328	11.1386	11.0081	12.3532	12.3547	12.3884	12.3879
ENSG00000272419.6 LINC01145	3026.93	1.76031	0.0651051	27.038	5.27999e-161	5.35719e-159	12.4433	12.312	12.2836	12.2172	10.8199	10.7918	10.7561	10.8465
ENSG00000169032.10 MAP2K1	3312.32	-1.71139	0.0632964	-27.0378	5.3185e-161	5.3759e-159	10.8144	10.9296	10.9753	11.0199	12.4122	12.3914	12.4856	12.4116
ENSG00000143702.16 CEP170	4486	-1.91124	0.0707224	-27.0245	7.61515e-161	7.6684e-159	11.1294	11.0904	11.1821	11.2583	12.8074	12.8172	12.8326	13.034
ENSG00000143970.17 ASXL2	1454.08	-2.10477	0.0779924	-26.9869	2.10724e-160	2.11402e-158	9.81912	9.77075	9.91518	9.94776	11.4114	11.4329	11.3751	11.5347
ENSG00000066777.9 ARFGEF1	2865.41	-1.79686	0.0667591	-26.9156	1.44163e-159	1.44087e-157	10.6962	10.7239	10.711	10.7518	12.1572	12.2418	12.201	12.394
ENSG00000011426.11 ANLN	1566.09	-1.74321	0.0647811	-26.9092	1.71523e-159	1.70796e-157	10.1037	10.0752	10.1216	10.1759	11.3952	11.4612	11.4778	11.5301
ENSG00000182054.10 IDH2	5209.73	-1.56481	0.0581678	-26.9017	2.09634e-159	2.07973e-157	11.5142	11.5384	11.614	11.6312	13.0642	12.982	13.0572	12.9086
ENSG00000213390.11 ARHGAP19	880.065	-2.10048	0.0781164	-26.8891	2.94745e-159	2.9133e-157	9.37841	9.4802	9.42404	9.51925	10.8707	10.8049	10.8307	10.8643
ENSG00000008294.21 SPAG9	2184.34	-1.94546	0.0724341	-26.8584	6.73649e-159	6.63396e-157	10.3704	10.2648	10.3334	10.3995	11.8732	11.9083	11.8484	12.0644
ENSG00000187720.14 THSD4	2155.1	-2.06679	0.0770489	-26.8244	1.67891e-158	1.6473e-156	10.3682	10.21	10.2511	10.2078	11.821	11.9258	11.9017	12.0619
ENSG00000214967.5 NPIPA7	540.058	3.45569	0.128846	26.8203	1.87231e-158	1.83035e-156	10.6239	10.4019	10.3382	10.3842	8.69301	8.58463	8.72398	8.71093
ENSG00000114857.18 NKTR	3536.68	2.14056	0.0798227	26.8164	2.07919e-158	2.02521e-156	12.7185	12.5955	12.4378	12.621	10.8646	10.7574	10.6238	10.7165
ENSG00000164949.8 GEM	1973.42	-1.97373	0.0736071	-26.8144	2.19372e-158	2.12903e-156	10.2946	10.0917	10.2093	10.2895	11.7357	11.7972	11.7949	11.873
ENSG00000196781.16 TLE1	1935.8	-1.91543	0.0714852	-26.7948	3.71607e-158	3.59345e-156	10.1704	10.2168	10.1798	10.3697	11.7459	11.7788	11.8125	11.7247
ENSG00000122218.16 COPA	7129.84	-1.53294	0.0572447	-26.7787	5.7181e-158	5.50953e-156	11.9356	11.9231	12.0738	12.0462	13.4503	13.4402	13.4753	13.3468
ENSG00000102221.14 JADE3	663.901	-2.29208	0.0856595	-26.758	9.95348e-158	9.55606e-156	9.18674	9.10123	9.17566	9.23108	10.5282	10.5323	10.576	10.5913
ENSG00000242247.11 ARFGAP3	2456.87	-1.818	0.067952	-26.7542	1.10298e-157	1.05516e-155	10.438	10.5013	10.5532	10.6564	12.0294	12.0185	12.1084	12.0584
ENSG00000197077.13 KIAA1671	1714.28	-1.99887	0.0747132	-26.7539	1.11221e-157	1.0602e-155	10.0293	10.06	10.0548	10.1456	11.6414	11.6015	11.5103	11.7443
ENSG00000168374.11 ARF4	5141.54	-1.78443	0.0667079	-26.75	1.2357e-157	1.17374e-155	11.2841	11.38	11.5069	11.4795	12.992	13.0088	13.0101	13.1288
ENSG00000134602.16 STK26	1974.94	-1.95214	0.073119	-26.6981	4.95224e-157	4.6873e-155	10.1882	10.2059	10.2511	10.2994	11.6865	11.7563	11.8191	11.9198
ENSG00000239264.9 TXNDC5	6828.45	-1.38357	0.0518587	-26.6796	8.11836e-157	7.65699e-155	11.9831	12.0214	12.1042	12.0437	13.3281	13.3134	13.4059	13.2727
ENSG00000109606.13 DHX15	4333.41	-1.3276	0.049778	-26.6705	1.03568e-156	9.73394e-155	11.4827	11.4327	11.5411	11.5235	12.7111	12.6668	12.7318	12.6647
ENSG00000139323.14 POC1B	1210.62	-2.10028	0.0788387	-26.6402	2.32398e-156	2.17658e-154	9.67092	9.63184	9.80465	9.71797	11.1948	11.1707	11.1817	11.3116
ENSG00000100522.10 GNPNAT1	2176.16	-2.23083	0.0837507	-26.6365	2.5642e-156	2.39319e-154	10.146	10.0797	10.2433	10.2356	11.8453	11.9441	11.9324	12.1411
ENSG00000072864.16 NDE1	2214.29	-1.68783	0.0633691	-26.6349	2.67856e-156	2.49125e-154	10.4474	10.4508	10.5377	10.5712	11.9171	11.8274	11.9561	11.8672
ENSG00000262413.1 AC145207.2	827.37	8.15196	0.306631	26.5855	9.97606e-156	9.24632e-154	10.9462	10.9337	11.0025	11.1438	7.92233	7.92893	8.0242	8.09303
ENSG00000127419.17 TMEM175	477.515	2.90064	0.109234	26.5543	2.29187e-155	2.1169e-153	10.3737	10.2635	10.2664	10.1902	8.78348	8.73067	8.79195	8.82297
ENSG00000110042.8 DTX4	1056.41	-2.05963	0.0775847	-26.5469	2.78653e-155	2.56495e-153	9.69319	9.57074	9.53641	9.64443	11.0128	11.1035	11.0685	11.0047
ENSG00000109971.14 HSPA8	63693.3	-2.15844	0.0813323	-26.5386	3.4806e-155	3.19286e-153	14.2855	14.55	14.6955	14.58	16.6733	16.6627	16.7865	16.5617
ENSG00000136868.11 SLC31A1	484.369	-2.5579	0.096446	-26.5216	5.46429e-155	4.99545e-153	8.91024	8.8712	8.8767	8.92118	10.243	10.2892	10.2848	10.2147
ENSG00000136026.14 CKAP4	7099.03	-1.47286	0.0555447	-26.5167	6.22527e-155	5.67177e-153	11.9407	12.0051	12.045	12.1252	13.4316	13.374	13.4559	13.3682
ENSG00000214026.11 MRPL23	2183.84	1.98266	0.0747987	26.5066	8.12542e-155	7.37788e-153	11.772	12.0229	12.0181	11.902	10.3283	10.2881	10.3728	10.2983
ENSG00000163249.13 CCNYL1	958.957	-2.19264	0.0827306	-26.5034	8.86409e-155	8.02141e-153	9.43881	9.50879	9.38663	9.56626	10.9125	10.9859	10.9175	11.002
ENSG00000137288.10 UQCC2	1621.3	2.12387	0.0801673	26.493	1.16814e-154	1.05353e-152	11.4931	11.6009	11.6352	11.5778	9.96454	10.0093	10.0315	9.8056
ENSG00000131504.17 DIAPH1	3762.25	-1.48719	0.0561371	-26.4921	1.19513e-154	1.07426e-152	11.2251	11.1297	11.2893	11.2506	12.5139	12.5582	12.5102	12.5935
ENSG00000150687.12 PRSS23	3041.07	-1.43821	0.0544367	-26.4199	8.09867e-154	7.25522e-152	10.944	10.9977	11.0167	11.0483	12.2366	12.1892	12.3025	12.2662
ENSG00000100883.13 SRP54	1995.55	-1.60636	0.0608255	-26.4093	1.07053e-153	9.55844e-152	10.3638	10.3983	10.5145	10.4717	11.7517	11.7257	11.763	11.728
ENSG00000113282.14 CLINT1	2664.85	-1.62456	0.0615484	-26.3948	1.57311e-153	1.39991e-151	10.6707	10.6858	10.7784	10.8255	12.1092	12.0657	12.1615	12.1393
ENSG00000244462.8 RBM12	2200.54	-1.82576	0.0691813	-26.3909	1.7411e-153	1.54427e-151	10.3627	10.3276	10.4747	10.5004	11.85	11.8884	11.9242	11.9854
ENSG00000153827.14 TRIP12	6296.07	-1.47485	0.0559416	-26.3641	3.53579e-153	3.12573e-151	11.8384	11.8392	11.8682	11.9479	13.1857	13.2186	13.2149	13.3452
ENSG00000169683.8 LRRC45	647.792	2.22723	0.0845594	26.3393	6.80821e-153	5.99884e-151	10.4955	10.5659	10.5366	10.4909	9.24374	9.15553	9.14842	9.1805
ENSG00000113083.15 LOX	3442.28	-2.32724	0.0883773	-26.333	8.03718e-153	7.05849e-151	10.4094	10.5426	10.6207	10.7853	12.5897	12.5064	12.6377	12.6254
ENSG00000125686.12 MED1	1826.4	-1.72441	0.0654994	-26.3271	9.39789e-153	8.22653e-151	10.2376	10.2596	10.2879	10.3425	11.5835	11.6505	11.6348	11.7463
ENSG00000129083.13 COPB1	6342.26	-1.26072	0.0478921	-26.3243	1.0117e-152	8.82715e-151	11.9476	12.0277	12.0532	12.056	13.1815	13.1874	13.2414	13.1701
ENSG00000268903.1 AL627309.6	1324.73	3.18624	0.121084	26.3142	1.3192e-152	1.14728e-150	11.7283	11.4547	11.2996	11.2894	9.38319	9.25357	9.16919	9.29173
ENSG00000187634.13 SAMD11	1459.74	1.81552	0.0690801	26.2814	3.1316e-152	2.71466e-150	11.4319	11.4367	11.3026	11.4006	10.0784	9.95038	10.0282	10.0026
ENSG00000088812.18 ATRN	1894.23	-1.8891	0.0719063	-26.2717	4.03964e-152	3.49051e-150	10.1755	10.1628	10.2549	10.32	11.712	11.7551	11.6417	11.8183
ENSG00000259357.2 AL590133.2	2662.25	4.61722	0.175798	26.2643	4.91162e-152	4.23031e-150	12.2707	12.5012	12.5024	12.4586	8.90224	9.25863	9.11288	9.19939
ENSG00000273142.1 LINC02604	465.014	4.01684	0.152962	26.2604	5.43156e-152	4.66313e-150	10.4391	10.4054	10.2498	10.148	8.57689	8.44145	8.38696	8.47421
ENSG00000169359.16 SLC33A1	1384.53	-1.78429	0.067976	-26.2488	7.37508e-152	6.31147e-150	9.96988	9.90974	10.0232	10.0211	11.2875	11.3608	11.268	11.3747
ENSG00000254206.5 NPIPB11	905.227	3.46627	0.132112	26.2373	9.98551e-152	8.51821e-150	11.2173	11.026	10.875	10.9278	8.98992	9.05376	8.77673	8.87226
ENSG00000130147.16 SH3BP4	2925.83	-1.52668	0.058191	-26.2357	1.0408e-151	8.85043e-150	10.8096	10.8801	10.9492	10.9763	12.1979	12.2102	12.2281	12.2417
ENSG00000136193.17 SCRN1	6787.81	-1.56568	0.0597028	-26.2246	1.39374e-151	1.18142e-149	11.8173	11.8345	11.9582	12.0229	13.345	13.3708	13.3606	13.3985
ENSG00000129226.14 CD68	4211.85	-1.85264	0.0706484	-26.2233	1.44027e-151	1.21701e-149	11.0302	11.0678	11.1291	11.2775	12.8308	12.78	12.812	12.6869
ENSG00000178502.6 KLHL11	529.389	-3.07841	0.117455	-26.2093	2.08126e-151	1.7531e-149	8.74877	8.7677	8.69016	8.89315	10.3734	10.3671	10.3396	10.4965
ENSG00000125257.16 ABCC4	921.555	-2.08428	0.0796642	-26.1633	6.94887e-151	5.83487e-149	9.42743	9.47779	9.51385	9.55273	10.8774	10.8307	10.8861	10.9743
ENSG00000091436.17 MAP3K20	3918.98	-1.79647	0.0686754	-26.1589	7.81349e-151	6.54038e-149	11.0116	11.0456	11.1427	11.1174	12.5691	12.6555	12.627	12.8138
ENSG00000134013.16 LOXL2	6966.71	-1.49656	0.0572747	-26.1295	1.68662e-150	1.40741e-148	11.917	11.9077	12.0618	12.067	13.3907	13.3733	13.4336	13.3526
ENSG00000173744.18 AGFG1	2787.26	-1.72242	0.0659726	-26.1081	2.94942e-150	2.45351e-148	10.6953	10.7107	10.6887	10.8366	12.1313	12.2253	12.1474	12.2884
ENSG00000140564.13 FURIN	7162.7	-1.69494	0.0649753	-26.086	5.2586e-150	4.36089e-148	11.9004	11.815	11.7934	12.0478	13.4898	13.5026	13.4413	13.4606
ENSG00000072803.18 FBXW11	1774.56	-1.98352	0.0760603	-26.0782	6.43579e-150	5.32065e-148	10.0546	10.1035	10.0813	10.2125	11.6245	11.6258	11.6127	11.7997
ENSG00000125107.19 CNOT1	4376.89	-1.58795	0.060936	-26.0593	1.05643e-149	8.70697e-148	11.2755	11.3086	11.3261	11.4629	12.7163	12.7853	12.7514	12.8348
ENSG00000099942.13 CRKL	4005.59	-1.48273	0.0569106	-26.0536	1.22524e-149	1.00673e-147	11.2824	11.2651	11.2471	11.412	12.6631	12.644	12.6052	12.597
ENSG00000198380.13 GFPT1	2230.36	-2.30612	0.0885783	-26.0348	2.00068e-149	1.63884e-147	10.0279	10.0812	10.1906	10.3189	11.961	11.966	11.9849	12.1348
ENSG00000100644.17 HIF1A	4911.17	-1.82151	0.0699666	-26.034	2.0422e-149	1.66775e-147	11.2458	11.2741	11.3147	11.4903	12.9142	12.9838	12.9549	13.0675
ENSG00000176624.12 MEX3C	2535.55	-1.7397	0.0668464	-26.0254	2.5582e-149	2.08279e-147	10.5669	10.5868	10.6915	10.6309	11.9895	12.0914	12.0387	12.1888
ENSG00000177951.17 BET1L	4625.45	-2.0314	0.0780603	-26.0234	2.68986e-149	2.18335e-147	11.1236	11.0252	11.0575	11.2753	13.0515	12.9465	12.9588	12.7946
ENSG00000074696.13 HACD3	1991.94	-1.79921	0.0691448	-26.021	2.86669e-149	2.31985e-147	10.2143	10.3561	10.3526	10.3914	11.6914	11.8033	11.7987	11.8224
ENSG00000101104.13 PABPC1L	2014.6	2.48168	0.0954305	26.0051	4.33383e-149	3.49656e-147	12.0952	11.942	11.8344	11.7314	10.0542	10.0148	9.92055	9.85927
ENSG00000254873.1 AP001267.1	391.961	3.2852	0.126419	25.9866	7.02357e-149	5.64965e-147	10.1704	10.1486	10.1301	9.97172	8.59594	8.61011	8.59443	8.55462
ENSG00000114331.15 ACAP2	1400.35	-2.514	0.0969494	-25.9311	2.97193e-148	2.38342e-146	9.60362	9.60385	9.66367	9.64983	11.3788	11.351	11.3584	11.6905
ENSG00000119812.19 FAM98A	894.037	-2.14102	0.0826956	-25.8904	8.53949e-148	6.82803e-146	9.36642	9.38225	9.54531	9.48275	10.8714	10.8613	10.8457	10.8884
ENSG00000112640.16 PPP2R5D	4080.21	-2.03725	0.078723	-25.8788	1.15438e-147	9.20276e-146	10.936	10.7818	11.1119	11.0399	12.7708	12.7861	12.8167	12.709
ENSG00000128294.16 TPST2	981.575	-2.02249	0.0783029	-25.8291	4.17654e-147	3.31966e-145	9.547	9.57074	9.54087	9.62259	11.0453	10.9476	10.9611	10.865
ENSG00000088340.17 FER1L4	775.529	2.60943	0.101061	25.8204	5.23203e-147	4.14631e-145	10.8944	10.7773	10.698	10.6832	9.25313	9.08386	9.10926	9.16404
ENSG00000102287.19 GABRE	2619.65	3.04295	0.117883	25.8134	6.26855e-147	4.95308e-145	12.4815	12.2417	12.254	12.273	10.0579	10.0405	9.754	9.68035
ENSG00000273749.5 CYFIP1	6419.87	-1.46313	0.0567321	-25.7902	1.14242e-146	9.00026e-145	11.8959	11.7927	11.9233	12.007	13.2875	13.2776	13.2338	13.266
ENSG00000135018.14 UBQLN1	5346.77	-1.73103	0.0671318	-25.7856	1.28645e-146	1.01052e-144	11.3756	11.4423	11.5452	11.6198	13.0115	13.0912	13.0629	13.1437
ENSG00000105519.18 CAPS	355.726	3.17225	0.123065	25.777	1.60518e-146	1.2572e-144	10.0712	9.98619	10.0323	9.93919	8.61909	8.57943	8.54816	8.56003
ENSG00000163527.10 STT3B	4541.66	-1.95258	0.0757583	-25.7738	1.74571e-146	1.36328e-144	11.0687	11.1247	11.2509	11.1669	12.7695	12.8833	12.8613	13.0717
ENSG00000058063.16 ATP11B	1764.21	-2.05676	0.0798032	-25.7729	1.78568e-146	1.39044e-144	10.0698	10.0322	10.0398	10.1333	11.5443	11.6644	11.6385	11.8303
ENSG00000161681.16 SHANK1	2609.88	-2.4977	0.0969164	-25.7717	1.84372e-146	1.43148e-144	10.437	10.1065	10.0755	10.1674	12.2333	12.2546	12.1719	12.3233
ENSG00000140743.8 CDR2	1133.66	-1.9779	0.0767626	-25.7664	2.11026e-146	1.63368e-144	9.78194	9.71422	9.65558	9.68349	11.129	11.0911	11.2086	11.037
ENSG00000079459.13 FDFT1	4064.5	-1.49504	0.0580358	-25.7606	2.4516e-146	1.89246e-144	11.2505	11.2715	11.3183	11.4076	12.6777	12.6587	12.6863	12.5758
ENSG00000116133.13 DHCR24	3165.61	-1.54606	0.060073	-25.7363	4.58873e-146	3.53201e-144	10.8929	10.945	11.0697	11.0251	12.2849	12.3154	12.361	12.3502
ENSG00000197712.12 FAM114A1	1388.17	-1.65741	0.0644137	-25.7308	5.29337e-146	4.0627e-144	10.0643	9.98781	10.1244	10.0116	11.3149	11.3054	11.3089	11.2773
ENSG00000050405.13 LIMA1	1387.3	-2.04696	0.0795709	-25.725	6.14076e-146	4.68622e-144	9.79219	9.78025	9.98135	9.8457	11.3232	11.3634	11.4562	11.3435
ENSG00000083312.18 TNPO1	5121.7	-2.46191	0.0957009	-25.725	6.1343e-146	4.68622e-144	10.8554	10.9601	10.9684	11.0296	12.952	13.0982	13.0756	13.4347
ENSG00000100614.18 PPM1A	1962.82	-1.79617	0.0698481	-25.7153	7.87736e-146	5.9944e-144	10.3313	10.2779	10.3249	10.3318	11.6531	11.7245	11.7674	11.8871
ENSG00000143614.10 GATAD2B	4192.1	-1.45006	0.0563968	-25.7117	8.64278e-146	6.55823e-144	11.4117	11.3197	11.3332	11.4476	12.6679	12.6971	12.613	12.7421
ENSG00000103994.18 ZNF106	2200.32	-2.06617	0.0803798	-25.7051	1.02463e-145	7.75301e-144	10.2254	10.2303	10.3016	10.3666	11.9184	11.9465	11.8275	12.1196
ENSG00000130559.19 CAMSAP1	1817.69	-1.50851	0.0588186	-25.6467	4.59987e-145	3.47076e-143	10.4105	10.3548	10.3786	10.4297	11.6379	11.5972	11.5363	11.6367
ENSG00000186660.15 ZFP91	2571.91	-1.78268	0.0695729	-25.6233	8.40256e-145	6.32222e-143	10.5448	10.5511	10.6138	10.7224	12.0368	12.1179	12.0663	12.2002
ENSG00000141424.13 SLC39A6	1090.76	-2.37981	0.0928803	-25.6224	8.59237e-145	6.44693e-143	9.39732	9.52979	9.42894	9.60596	11.0846	11.0504	11.1437	11.2415
ENSG00000078369.18 GNB1	14211.7	-1.31668	0.0513943	-25.6193	9.30851e-145	6.96474e-143	12.9632	13.0585	13.0988	13.1351	14.3514	14.2972	14.3801	14.3234
ENSG00000103168.17 TAF1C	2163.37	2.03383	0.0793916	25.6177	9.69609e-145	7.23452e-143	12.067	11.8332	11.8686	11.9383	10.3491	10.3576	10.2261	10.1909
ENSG00000111145.8 ELK3	3529.03	-1.96103	0.0765523	-25.6169	9.89629e-145	7.36339e-143	10.7615	10.8401	10.8096	10.9956	12.4847	12.5299	12.5177	12.7021
ENSG00000247095.3 MIR210HG	1132.92	1.75864	0.0686737	25.6086	1.22415e-144	9.08314e-143	11.1036	11.1062	11.0445	11.0572	9.83404	9.8443	9.83899	9.73092
ENSG00000104907.13 TRMT1	2406.57	1.51268	0.0591679	25.566	3.64651e-144	2.69822e-142	11.949	11.938	11.9466	12.0103	10.7607	10.7139	10.6868	10.6056
ENSG00000155304.6 HSPA13	1400.61	-2.57602	0.100975	-25.5114	1.47191e-143	1.08613e-141	9.547	9.51817	9.71308	9.61523	11.3349	11.3956	11.4144	11.6714
ENSG00000101187.16 SLCO4A1	15673	-1.41776	0.0557469	-25.4321	1.11331e-142	8.19262e-141	13.1957	13.0426	13.0884	13.1885	14.5592	14.5105	14.5301	14.4141
ENSG00000113070.8 HBEGF	658.871	-2.15741	0.0848431	-25.4282	1.2299e-142	9.02579e-141	9.21188	9.14743	9.25522	9.26635	10.5722	10.4926	10.5288	10.5298
ENSG00000101557.15 USP14	3592.9	-1.5166	0.0597378	-25.3876	3.45901e-142	2.5315e-140	11.0465	11.1713	11.1841	11.2005	12.427	12.5066	12.4666	12.5556
ENSG00000148362.11 PAXX	1286.57	1.86168	0.0733688	25.3743	4.8439e-142	3.53539e-140	11.2876	11.1808	11.2696	11.255	9.95008	9.87659	9.8983	9.7746
ENSG00000115307.17 AUP1	6905.79	1.25785	0.0496024	25.3587	7.19954e-142	5.2404e-140	13.3239	13.3065	13.3242	13.2924	12.1477	12.1279	12.2107	12.0494
ENSG00000165617.15 DACT1	1526.85	-1.84236	0.0727168	-25.3361	1.27948e-141	9.28784e-140	9.98022	9.98134	10.0308	10.1735	11.4369	11.4732	11.4416	11.4664
ENSG00000133065.11 SLC41A1	1127.4	-1.83625	0.0724808	-25.3344	1.33621e-141	9.67346e-140	9.82576	9.67782	9.76806	9.80823	11.0601	11.1317	11.0477	11.1065
ENSG00000206149.10 HERC2P9	929.535	1.98307	0.0782901	25.3298	1.50023e-141	1.08316e-139	10.9607	10.8868	10.8402	10.8594	9.56989	9.50938	9.47889	9.61272
ENSG00000182158.15 CREB3L2	1488.39	-2.03778	0.0805124	-25.3101	2.4735e-141	1.78106e-139	9.85363	9.81202	10.0216	9.98285	11.4306	11.4457	11.41	11.5402
ENSG00000123416.15 TUBA1B	14504.8	-1.81392	0.0716936	-25.301	3.11552e-141	2.23733e-139	12.6151	12.6799	12.8808	12.7792	14.5309	14.4638	14.5938	14.3637
ENSG00000008282.9 SYPL1	1269.05	-2.70949	0.107106	-25.2972	3.43018e-141	2.45671e-139	9.40667	9.40815	9.62269	9.39075	11.2468	11.3294	11.2769	11.5448
ENSG00000178104.19 PDE4DIP	3947.09	-1.62372	0.0641924	-25.2946	3.65946e-141	2.61393e-139	11.2744	11.1261	11.1195	11.2627	12.6344	12.6382	12.5644	12.7233
ENSG00000104365.16 IKBKB	1841.93	1.4831	0.0586359	25.2933	3.78654e-141	2.69751e-139	11.6591	11.5682	11.6571	11.5658	10.4235	10.4136	10.4555	10.3928
ENSG00000100030.15 MAPK1	2781.93	-1.50891	0.0597006	-25.2746	6.0818e-141	4.32114e-139	10.8152	10.8042	10.905	10.9039	12.0749	12.1318	12.1697	12.2165
ENSG00000113569.16 NUP155	2452.59	-1.72852	0.068445	-25.2541	1.02193e-140	7.24167e-139	10.4485	10.6023	10.6285	10.6707	11.979	12.0499	12.0363	12.067
ENSG00000132207.18 SLX1A	839.201	3.17565	0.125785	25.2466	1.23429e-140	8.72337e-139	11.0281	11.0802	10.7419	10.7487	9.10317	8.93736	8.96969	8.94677
ENSG00000159200.18 RCAN1	1097.79	-1.94569	0.0770874	-25.24	1.45715e-140	1.02714e-138	9.76815	9.64455	9.63306	9.73654	11.0459	11.1085	11.1346	11.006
ENSG00000072274.13 TFRC	2567.32	-1.90511	0.0755428	-25.219	2.4817e-140	1.74475e-138	10.5233	10.5275	10.5778	10.5173	12.0434	12.0982	12.0411	12.3127
ENSG00000204055.5 AL158151.1	1176.31	6.60158	0.261947	25.2019	3.8166e-140	2.67622e-138	11.1062	11.3454	11.6017	11.5843	8.34285	8.17628	8.23672	8.18786
ENSG00000132635.17 PCED1A	2753.79	1.54403	0.0612711	25.2	4.00824e-140	2.80326e-138	12.227	12.1326	12.0742	12.138	10.8888	10.8352	10.8297	10.7465
ENSG00000092094.11 OSGEP	719.959	2.19229	0.0871286	25.1615	1.05683e-139	7.37194e-138	10.6036	10.7154	10.5767	10.6292	9.30783	9.32241	9.22271	9.21268
ENSG00000130589.16 HELZ2	4162.29	-1.40856	0.0560111	-25.1479	1.49003e-139	1.03667e-137	11.4827	11.3356	11.3906	11.3719	12.6881	12.6639	12.5871	12.7004
ENSG00000170906.16 NDUFA3	2036.28	1.96419	0.0781349	25.1385	1.88793e-139	1.31011e-137	11.7037	11.8672	11.8908	11.8865	10.2981	10.3157	10.3001	10.123
ENSG00000172380.6 GNG12	5975.49	-2.03567	0.0810038	-25.1306	2.30523e-139	1.59556e-137	11.3259	11.3976	11.4431	11.548	13.1466	13.2551	13.2605	13.4888
ENSG00000138316.11 ADAMTS14	789.485	2.83622	0.112998	25.0998	4.99627e-139	3.44923e-137	11.0377	10.7069	10.7437	10.7183	9.01652	9.11311	9.08727	9.1073
ENSG00000100196.11 KDELR3	1194.1	-1.95802	0.0780262	-25.0944	5.72095e-139	3.93937e-137	9.80573	9.67165	9.75501	9.81455	11.1639	11.204	11.2541	11.0782
ENSG00000158286.13 RNF207	1301.32	2.66253	0.10622	25.0663	1.16083e-138	7.97281e-137	11.613	11.3812	11.2465	11.2479	9.5946	9.50938	9.43631	9.45449
ENSG00000167601.12 AXL	2352.92	-1.32521	0.0529055	-25.0487	1.80416e-138	1.23596e-136	10.7854	10.7508	10.8113	10.7447	11.8422	11.8729	11.9194	11.9103
ENSG00000149115.14 TNKS1BP1	4068.85	-1.58392	0.0632628	-25.0371	2.41212e-138	1.64824e-136	11.3063	11.211	11.1575	11.353	12.7382	12.6263	12.6305	12.6939
ENSG00000198743.7 SLC5A3	12484.3	-2.56295	0.10239	-25.0312	2.79939e-138	1.908e-136	12.0739	11.902	11.8551	12.0717	14.2975	14.3534	14.2042	14.7317
ENSG00000143321.19 HDGF	7051.22	-1.38011	0.0551379	-25.0301	2.87256e-138	1.95291e-136	11.9898	12.0326	12.1461	12.1557	13.3928	13.349	13.4045	13.3504
ENSG00000145740.19 SLC30A5	1478.53	-1.80576	0.0722016	-25.0099	4.76581e-138	3.23182e-136	9.97284	9.95019	10.1131	10.0867	11.3542	11.427	11.3892	11.4591
ENSG00000029153.14 ARNTL2	3738.96	-1.83839	0.0735093	-25.009	4.88406e-138	3.30365e-136	10.9948	10.9109	10.992	11.0897	12.4946	12.5824	12.5989	12.7688
ENSG00000164548.11 TRA2A	1633.21	1.58706	0.0635119	24.9885	8.16132e-138	5.50653e-136	11.5287	11.4961	11.5308	11.3861	10.2693	10.2428	10.232	10.2253
ENSG00000176994.11 SMCR8	2056.62	-1.72913	0.0692283	-24.9772	1.0827e-137	7.28674e-136	10.3313	10.3561	10.3938	10.5191	11.846	11.8188	11.7269	11.8318
ENSG00000111266.9 DUSP16	1343.67	-1.56621	0.0627392	-24.9638	1.51378e-137	1.01625e-135	10.0093	10.0353	10.0959	10.1058	11.2229	11.2422	11.2294	11.2789
ENSG00000136536.15 MARCHF7	1896.34	-1.81933	0.0728881	-24.9606	1.63914e-137	1.09765e-135	10.2436	10.2086	10.2841	10.3361	11.6488	11.697	11.6727	11.8573
ENSG00000111450.14 STX2	3734.82	1.84709	0.0740113	24.9569	1.79569e-137	1.19949e-135	12.7931	12.5997	12.5094	12.5397	11.0116	11.0407	10.9984	10.9136
ENSG00000205560.13 CPT1B	606.788	3.3441	0.134178	24.923	4.19496e-137	2.79518e-135	10.7074	10.5199	10.4888	10.5107	8.79829	8.89886	8.61963	8.70649
ENSG00000148606.13 POLR3A	1697.72	-1.45271	0.0582991	-24.9182	4.72251e-137	3.13889e-135	10.3358	10.3213	10.3406	10.4086	11.5346	11.4751	11.5317	11.4769
ENSG00000115677.17 HDLBP	16174	-1.369	0.0549672	-24.9058	6.44547e-137	4.27348e-135	13.2051	13.1242	13.1696	13.3226	14.5634	14.5328	14.5693	14.476
ENSG00000113384.14 GOLPH3	3882.01	-1.61133	0.0647022	-24.9038	6.77572e-137	4.48135e-135	11.0479	11.1876	11.2596	11.2378	12.5539	12.5947	12.664	12.6483
ENSG00000119777.20 TMEM214	2826.77	-1.52207	0.0611648	-24.8847	1.08888e-136	7.18393e-135	10.8891	10.8675	10.8156	10.9004	12.2263	12.2099	12.1963	12.0539
ENSG00000099219.14 ERMP1	1863.54	-1.90202	0.0764604	-24.8759	1.35565e-136	8.922e-135	10.125	10.14	10.2765	10.2762	11.6296	11.6677	11.7349	11.8202
ENSG00000140199.13 SLC12A6	3651	-1.96799	0.0791305	-24.8702	1.56344e-136	1.02643e-134	10.9183	10.8547	10.8799	10.9032	12.5363	12.6013	12.4548	12.8144
ENSG00000182752.10 PAPPA	1081.85	-2.79659	0.11247	-24.8653	1.76807e-136	1.15793e-134	9.32722	9.21322	9.26935	9.39741	11.003	11.1066	11.1445	11.4007
ENSG00000100226.16 GTPBP1	1945.59	-1.57587	0.0634125	-24.8511	2.51869e-136	1.6455e-134	10.3582	10.4462	10.4348	10.4727	11.7722	11.7293	11.6785	11.629
ENSG00000105939.14 ZC3HAV1	1549.44	-1.62644	0.0654856	-24.8366	3.60504e-136	2.3495e-134	10.1653	10.1543	10.1607	10.1984	11.3627	11.3946	11.4305	11.5264
ENSG00000180730.5 SHISA2	697.562	-2.17375	0.0877452	-24.7734	1.73313e-135	1.12678e-133	9.23105	9.20099	9.29708	9.28358	10.5664	10.523	10.6029	10.6825
ENSG00000111897.7 SERINC1	2862.48	-2.02784	0.0818893	-24.7631	2.23775e-135	1.45134e-133	10.4243	10.6246	10.5838	10.6774	12.1635	12.2775	12.3048	12.4203
ENSG00000096070.19 BRPF3	1307.82	-1.68274	0.0679542	-24.7629	2.25375e-135	1.45819e-133	9.94139	9.91316	10.0277	10.0305	11.2473	11.2745	11.1773	11.2382
ENSG00000153914.16 SREK1	3889.12	1.78989	0.0723247	24.748	3.25637e-135	2.10181e-133	12.7616	12.6806	12.5806	12.6007	11.0231	11.0382	11.0051	11.2233
ENSG00000051382.9 PIK3CB	1410.75	-1.92771	0.0779453	-24.7316	4.89699e-135	3.15315e-133	9.81244	9.91657	9.95432	10.017	11.3261	11.3593	11.3375	11.4635
ENSG00000162413.16 KLHL21	3138.11	-1.56956	0.0634736	-24.7277	5.38696e-135	3.46031e-133	10.9205	10.8649	11.01	11.0393	12.3771	12.3141	12.3477	12.2465
ENSG00000169020.10 ATP5ME	1599.04	1.69973	0.0687744	24.7146	7.45413e-135	4.77671e-133	11.4085	11.5123	11.4985	11.5135	10.243	10.1633	10.1679	10.0714
ENSG00000115602.17 IL1RL1	292.646	-3.88107	0.157107	-24.7033	9.84612e-135	6.29447e-133	8.42399	8.35446	8.25416	8.37789	9.85127	9.9199	9.88703	9.79914
ENSG00000170348.9 TMED10	6858.38	-2.34528	0.0949685	-24.6953	1.20102e-134	7.65962e-133	11.1389	11.3136	11.5544	11.4931	13.419	13.5332	13.5133	13.6739
ENSG00000184381.20 PLA2G6	890.29	2.1927	0.0888766	24.6713	2.17294e-134	1.38253e-132	10.9636	10.8375	10.8284	10.8433	9.44411	9.48471	9.45246	9.29664
ENSG00000166439.6 RNF169	1210.08	-2.0584	0.0834476	-24.667	2.41547e-134	1.53319e-132	9.79728	9.77265	9.58246	9.74656	11.2401	11.2098	11.1232	11.2578
ENSG00000267680.5 ZNF224	796.087	2.13032	0.0864065	24.6546	3.28835e-134	2.08231e-132	10.8264	10.7314	10.7473	10.6257	9.39769	9.32241	9.33152	9.40197
ENSG00000140598.15 EFL1	1202.88	-1.52403	0.0618257	-24.6504	3.64321e-134	2.30158e-132	9.9758	9.97484	9.96551	9.99663	11.1167	11.053	11.1209	11.1182
ENSG00000162607.13 USP1	2040.7	-1.99459	0.0809229	-24.6481	3.85816e-134	2.43164e-132	10.1447	10.1642	10.3562	10.3081	11.77	11.7957	11.8599	11.9569
ENSG00000260563.3 AC132872.1	400.742	3.07696	0.124939	24.6277	6.38241e-134	4.01313e-132	10.2351	10.0917	10.0186	10.107	8.63265	8.7044	8.5815	8.67929
ENSG00000167258.15 CDK12	1481.65	-1.78161	0.0724796	-24.5809	2.02303e-133	1.26906e-131	10.0007	9.98619	10.0726	10.1233	11.3618	11.4026	11.3506	11.5035
ENSG00000188042.8 ARL4C	5166.62	-1.42673	0.0580744	-24.5673	2.82836e-133	1.7701e-131	11.6234	11.5729	11.686	11.727	12.9222	12.9261	12.9317	13.0509
ENSG00000117036.12 ETV3	1133.03	-1.89664	0.0773044	-24.5347	6.2974e-133	3.93198e-131	9.63868	9.72613	9.78282	9.83333	11.0636	11.0898	11.1467	11.112
ENSG00000185596.16 WASH3P	3382.85	2.00531	0.0817635	24.5258	7.83801e-133	4.88254e-131	12.6389	12.4841	12.4356	12.484	10.939	10.766	10.7601	10.6328
ENSG00000172071.14 EIF2AK3	490.421	-2.63002	0.107306	-24.5095	1.16863e-132	7.26285e-131	8.95368	8.77719	8.90103	8.8752	10.2817	10.2543	10.2218	10.3506
ENSG00000143870.13 PDIA6	5346.16	-2.06363	0.0842459	-24.4953	1.65912e-132	1.02873e-130	11.0384	11.2619	11.402	11.374	13.1362	13.0692	13.2097	13.1613
ENSG00000182934.12 SRPRA	4797.93	-1.49115	0.0608938	-24.4876	2.00007e-132	1.23727e-130	11.4656	11.4791	11.4874	11.6397	12.8901	12.916	12.8973	12.7897
ENSG00000198431.16 TXNRD1	2836	-1.76202	0.0720158	-24.4672	3.30437e-132	2.03942e-130	10.598	10.6575	10.8062	10.8433	12.2231	12.2111	12.2589	12.2291
ENSG00000177595.18 PIDD1	1263.14	2.02566	0.08281	24.4615	3.79659e-132	2.33783e-130	11.3842	11.1781	11.2114	11.2384	9.86263	9.81119	9.7329	9.70502
ENSG00000103342.13 GSPT1	3911.77	-1.41622	0.0578979	-24.4606	3.88591e-132	2.38734e-130	11.2065	11.2918	11.3763	11.3806	12.5632	12.5888	12.6065	12.5569
ENSG00000124181.14 PLCG1	11098.9	1.54759	0.0632803	24.4562	4.32707e-132	2.65229e-130	14.2145	14.0302	13.9783	13.9667	12.5852	12.6177	12.5347	12.5449
ENSG00000167193.8 CRK	2900.54	-1.2853	0.0526022	-24.4343	7.39059e-132	4.51973e-130	10.9578	11.053	11.0797	11.0521	12.1179	12.1534	12.156	12.1636
ENSG00000136758.19 YME1L1	4153.03	-1.22507	0.0501376	-24.4342	7.4149e-132	4.52427e-130	11.4995	11.4384	11.5406	11.5403	12.5685	12.6123	12.6005	12.6516
ENSG00000147065.17 MSN	18483.5	-1.38253	0.0566059	-24.4238	9.56725e-132	5.82428e-130	13.273	13.3361	13.415	13.4956	14.7012	14.7262	14.774	14.7128
ENSG00000116962.15 NID1	3401.43	-1.99724	0.0817751	-24.4236	9.60274e-132	5.83263e-130	10.6439	10.7021	10.8182	10.9729	12.4925	12.5082	12.4915	12.5802
ENSG00000056097.16 ZFR	3944.25	-1.31295	0.0537585	-24.4232	9.70702e-132	5.88263e-130	11.3507	11.3604	11.3543	11.4837	12.5321	12.5559	12.5638	12.6005
ENSG00000075426.12 FOSL2	2673.2	-1.64337	0.0673187	-24.4118	1.28167e-131	7.74961e-130	10.7507	10.6196	10.6953	10.8587	12.114	12.1065	12.129	12.1609
ENSG00000126778.12 SIX1	1076.44	-1.78769	0.073289	-24.3923	2.06202e-131	1.24399e-129	9.69319	9.7496	9.7304	9.83798	10.9607	11.0479	11.0347	11.05
ENSG00000100650.16 SRSF5	7207.67	1.55734	0.0638498	24.3906	2.15074e-131	1.2946e-129	13.5691	13.4452	13.3738	13.4037	12.027	12.0273	12.0439	11.8719
ENSG00000276045.3 ORAI1	867.912	-1.942	0.0796983	-24.3669	3.83429e-131	2.30281e-129	9.46789	9.46809	9.55636	9.53906	10.8442	10.7629	10.8669	10.732
ENSG00000185246.18 PRPF39	888.527	1.8933	0.0777603	24.3479	6.10658e-131	3.6593e-129	10.7935	10.7701	10.8267	10.889	9.46957	9.57859	9.58398	9.56288
ENSG00000183648.11 NDUFB1	1890.83	2.20291	0.0905229	24.3354	8.26997e-131	4.94463e-129	11.6039	11.8925	11.9087	11.7111	10.0664	9.95182	10.1386	10.0675
ENSG00000120318.16 ARAP3	1708.43	1.60005	0.0657691	24.3283	9.8339e-131	5.86661e-129	11.6489	11.4934	11.5205	11.5125	10.2302	10.3157	10.2693	10.3094
ENSG00000156515.24 HK1	7472.37	-1.29439	0.0532382	-24.3132	1.42003e-130	8.45265e-129	12.1129	12.2044	12.2565	12.2794	13.4647	13.3883	13.4556	13.4157
ENSG00000108848.16 LUC7L3	3199.73	1.83413	0.0754601	24.3059	1.69808e-130	1.00853e-128	12.4998	12.3951	12.2836	12.4341	10.9027	10.8962	10.7915	10.6867
ENSG00000151779.13 NBAS	1976.19	-1.51711	0.0624198	-24.3049	1.73864e-130	1.03034e-128	10.4874	10.3816	10.4649	10.5649	11.6948	11.6991	11.7209	11.726
ENSG00000109171.15 SLAIN2	1424.64	-1.81029	0.0745003	-24.299	2.00644e-130	1.18641e-128	9.98463	9.94019	9.98763	10.0647	11.2658	11.3747	11.3355	11.4697
ENSG00000143418.20 CERS2	11806.6	-1.48384	0.0610738	-24.2958	2.1719e-130	1.28142e-128	12.559	12.677	12.8113	12.7349	14.1427	14.1159	14.1609	14.0657
ENSG00000274512.5 TBC1D3L	747.684	2.2818	0.0939211	24.2948	2.22408e-130	1.30932e-128	10.7984	10.6634	10.685	10.5873	9.28989	9.3248	9.22922	9.18593
ENSG00000106080.11 FKBP14	783.268	-2.212	0.0910748	-24.2877	2.64531e-130	1.55389e-128	9.23916	9.33685	9.36617	9.33609	10.6997	10.747	10.6205	10.8337
ENSG00000082641.16 NFE2L1	4682.94	-1.24835	0.0514104	-24.282	3.03423e-130	1.77844e-128	11.5831	11.5974	11.6721	11.7087	12.7352	12.8021	12.7909	12.78
ENSG00000103966.11 EHD4	1538.71	-1.41757	0.0584156	-24.2669	4.38035e-130	2.56184e-128	10.258	10.2464	10.3188	10.2561	11.3675	11.3452	11.4181	11.3695
ENSG00000261327.5 AC134312.5	788.558	1.9542	0.0805617	24.2572	5.54601e-130	3.2365e-128	10.7731	10.6595	10.7128	10.6403	9.48305	9.38735	9.4089	9.43724
ENSG00000176142.13 TMEM39A	1453.83	-1.48996	0.061443	-24.2495	6.70058e-130	3.90178e-128	10.1806	10.174	10.1357	10.2137	11.3153	11.3097	11.3841	11.2795
ENSG00000101654.18 RNMT	1837.37	-1.36093	0.0561448	-24.2397	8.50014e-130	4.93893e-128	10.4722	10.5297	10.4747	10.4582	11.5472	11.6063	11.5539	11.6165
ENSG00000046604.13 DSG2	2147.55	-2.22034	0.0916015	-24.2391	8.61242e-130	4.99334e-128	10.0093	10.0752	10.3188	10.2561	11.8591	11.9476	11.9866	12.0067
ENSG00000006282.21 SPATA20	2104.98	1.4271	0.0588781	24.2383	8.7847e-130	5.08222e-128	11.7942	11.6734	11.7839	11.8198	10.5764	10.6068	10.6183	10.5759
ENSG00000072364.13 AFF4	2600.31	-2.35696	0.0972632	-24.2328	1.00447e-129	5.79863e-128	10.2723	10.199	10.26	10.3944	12.1075	12.2045	12.0667	12.4726
ENSG00000118816.11 CCNI	10226.2	-1.99945	0.0825482	-24.2216	1.31741e-129	7.58883e-128	11.8944	12.0919	12.2528	12.291	14.0007	14.0183	14.0427	14.0794
ENSG00000119669.5 IRF2BPL	11243.2	-1.455	0.0600985	-24.2102	1.73833e-129	9.99205e-128	12.5175	12.6028	12.7233	12.7531	14.0456	14.0557	14.0546	14.026
ENSG00000140526.18 ABHD2	1230.27	-2.21765	0.0916244	-24.2038	2.03131e-129	1.16511e-127	9.56752	9.64876	9.68168	9.7565	11.1916	11.2011	11.1846	11.4213
ENSG00000197956.10 S100A6	44794.1	1.89344	0.0783278	24.1733	4.24851e-129	2.43164e-127	15.9246	16.1686	16.2693	16.0793	14.3242	14.1522	14.3532	14.1423
ENSG00000182472.9 CAPN12	314.397	3.62666	0.150034	24.1723	4.35737e-129	2.48862e-127	10.0392	9.86092	9.88503	9.88361	8.51128	8.42855	8.39564	8.36818
ENSG00000100227.18 POLDIP3	2638.16	-1.61784	0.0669359	-24.1699	4.60806e-129	2.6262e-127	10.652	10.7163	10.8139	10.751	12.1058	12.1062	12.1977	12.0021
ENSG00000089820.16 ARHGAP4	3796.49	1.48372	0.0614125	24.1599	5.88143e-129	3.3448e-127	12.6799	12.4838	12.5244	12.5264	11.2391	11.2941	11.2301	11.1868
ENSG00000179388.9 EGR3	415.806	-2.42855	0.100538	-24.1556	6.52612e-129	3.70357e-127	8.84111	8.84969	8.8808	8.84948	10.0904	10.0458	10.1277	10.1116
ENSG00000173137.12 ADCK5	747.577	2.0393	0.0845515	24.119	1.57861e-128	8.93966e-127	10.6601	10.592	10.6565	10.6939	9.41404	9.35302	9.39215	9.26179
ENSG00000177885.15 GRB2	2915.92	-1.67147	0.0693464	-24.1031	2.31725e-128	1.30949e-126	10.6538	10.8139	10.9026	10.879	12.2541	12.2284	12.2418	12.2668
ENSG00000198805.12 PNP	2483.76	-1.95797	0.0812335	-24.103	2.32699e-128	1.31223e-126	10.32	10.5101	10.5543	10.4861	12.1662	12.0992	12.1612	11.9421
ENSG00000167081.18 PBX3	762.818	-1.89814	0.0787708	-24.097	2.6852e-128	1.51104e-126	9.432	9.377	9.39923	9.49911	10.6238	10.6698	10.6271	10.6858
ENSG00000241404.7 EGFL8	682.94	2.69974	0.112046	24.095	2.8197e-128	1.5834e-126	10.8144	10.6084	10.5429	10.5541	9.07601	9.11887	8.95714	9.00638
ENSG00000185722.18 ANKFY1	2688.36	1.72582	0.0716394	24.0903	3.15601e-128	1.76855e-126	12.2724	12.0901	12.098	12.1436	10.6959	10.7566	10.5658	10.7401
ENSG00000103024.7 NME3	1283.59	1.60571	0.0666749	24.0826	3.80352e-128	2.12696e-126	11.1784	11.176	11.2665	11.1651	10.0542	10.0202	9.96039	9.9575
ENSG00000110324.11 IL10RA	15889.5	2.50106	0.103854	24.0823	3.82893e-128	2.13226e-126	15.0752	14.6897	14.5073	14.6401	12.4864	12.2682	12.2474	12.3587
ENSG00000186432.10 KPNA4	3460.97	-1.46853	0.0609795	-24.0824	3.82569e-128	2.13226e-126	11.0971	11.1048	11.1972	11.145	12.3311	12.4409	12.407	12.5266
ENSG00000100335.15 MIEF1	1463.25	-1.7483	0.0726097	-24.0781	4.23882e-128	2.35562e-126	9.96393	10.0446	10.0293	10.1614	11.3503	11.3515	11.3936	11.4396
ENSG00000062650.20 WAPL	1371.28	-1.67189	0.0694549	-24.0716	4.96411e-128	2.75297e-126	10.0208	9.94686	10.0828	10.0608	11.2297	11.3006	11.2659	11.3602
ENSG00000119314.16 PTBP3	1966.4	-2.40567	0.0999766	-24.0623	6.20227e-128	3.43252e-126	9.91072	9.92675	10.0017	10.088	11.6891	11.8363	11.7973	12.1052
ENSG00000086062.13 B4GALT1	2990.29	-1.51693	0.0630915	-24.0433	9.81657e-128	5.42158e-126	10.8452	10.8893	10.96	11.0419	12.2114	12.2602	12.2171	12.2939
ENSG00000006831.10 ADIPOR2	2085.57	-1.44855	0.0602654	-24.0361	1.16633e-127	6.42827e-126	10.5005	10.5383	10.6098	10.6343	11.7462	11.7389	11.8167	11.7471
ENSG00000164050.13 PLXNB1	1929.16	1.82831	0.0760774	24.0322	1.28103e-127	7.04594e-126	11.8523	11.6901	11.7053	11.727	10.3253	10.3755	10.1587	10.2532
ENSG00000136158.12 SPRY2	2027.35	-1.55093	0.0645501	-24.0267	1.46132e-127	8.02111e-126	10.4505	10.3971	10.5838	10.5032	11.7575	11.7039	11.782	11.7558
ENSG00000154127.10 UBASH3B	6084.87	-1.45003	0.0603855	-24.0129	2.04004e-127	1.11747e-125	11.8619	11.8224	11.7529	11.9421	13.1495	13.1555	13.1603	13.2866
ENSG00000125430.9 HS3ST3B1	1272.53	-2.49582	0.103947	-24.0104	2.1654e-127	1.18372e-125	9.6406	9.33139	9.57382	9.66766	11.304	11.3081	11.3401	11.3773
ENSG00000067704.10 IARS2	1481.7	-1.9098	0.0795978	-23.9931	3.27873e-127	1.78868e-125	9.87454	9.91657	10.0813	10.0424	11.3952	11.366	11.4682	11.486
ENSG00000145390.11 USP53	1978.79	-1.99852	0.0832975	-23.9926	3.32411e-127	1.80975e-125	10.3073	10.0782	10.1743	10.2796	11.7202	11.7957	11.7713	11.939
ENSG00000169299.14 PGM2	832.262	-2.01981	0.0842711	-23.9679	6.00623e-127	3.26334e-125	9.39732	9.377	9.45792	9.53315	10.7118	10.7763	10.7442	10.836
ENSG00000130770.18 ATP5IF1	3290.43	1.59979	0.0667542	23.9654	6.38508e-127	3.45517e-125	12.2647	12.4596	12.4118	12.4239	11.0648	10.9614	11.0453	10.9136
ENSG00000137309.20 HMGA1	65611.7	-1.53866	0.0642036	-23.9654	6.38325e-127	3.45517e-125	14.8928	15.0261	15.1615	15.1239	16.5792	16.5778	16.6549	16.5097
ENSG00000104856.14 RELB	2939.3	-1.4051	0.0586873	-23.9422	1.11494e-126	6.0211e-125	10.9168	10.9409	11.0248	11.0412	12.1894	12.1297	12.255	12.2079
ENSG00000123505.19 AMD1	1928.54	-1.79431	0.0749529	-23.9391	1.19966e-126	6.46562e-125	10.2521	10.2921	10.3334	10.3211	11.6134	11.7425	11.698	11.8835
ENSG00000156273.16 BACH1	1786.58	-2.07023	0.086485	-23.9375	1.24829e-126	6.71418e-125	10.0739	9.99424	10.0696	10.1541	11.5526	11.6748	11.6459	11.8727
ENSG00000144724.20 PTPRG	2228.76	-2.48286	0.103726	-23.9368	1.26935e-126	6.81376e-125	10.0064	9.91657	10.1524	10.1468	11.9126	12.0028	11.9216	12.2824
ENSG00000089902.10 RCOR1	1691.53	-1.82082	0.0760895	-23.9299	1.49511e-126	8.00958e-125	10.1024	10.1168	10.1031	10.2851	11.5663	11.5183	11.5522	11.6697
ENSG00000102878.17 HSF4	1640.02	2.86164	0.119607	23.9254	1.66813e-126	8.91865e-125	11.9353	11.7117	11.4969	11.5778	9.70329	9.67295	9.52505	9.43289
ENSG00000073756.13 PTGS2	6855.95	-2.14484	0.0896654	-23.9205	1.87236e-126	9.99066e-125	11.4661	11.3271	11.5447	11.7322	13.4167	13.4463	13.4903	13.65
ENSG00000021574.13 SPAST	575.671	-2.54938	0.106593	-23.917	2.0396e-126	1.08614e-124	9.03844	8.95657	8.97793	9.00389	10.3303	10.389	10.4217	10.5859
ENSG00000164442.10 CITED2	1535.84	-1.91414	0.0800592	-23.9091	2.46219e-126	1.30857e-124	9.84875	10.0554	10.0201	10.1133	11.4562	11.4665	11.4991	11.4769
ENSG00000088448.14 ANKRD10	2666.13	1.31455	0.0550035	23.8994	3.10456e-126	1.64671e-124	12.1177	12.0593	11.9794	12.0213	10.9203	10.9337	10.9429	10.8899
ENSG00000116044.16 NFE2L2	2047.06	-1.31396	0.0550976	-23.848	1.06317e-125	5.62807e-124	10.5877	10.5889	10.6508	10.6699	11.6781	11.6958	11.7428	11.7069
ENSG00000173706.14 HEG1	1627.3	-2.10864	0.0884341	-23.8442	1.16344e-125	6.14675e-124	9.91846	9.90632	9.93652	10.0931	11.5172	11.5653	11.4784	11.7451
ENSG00000100985.7 MMP9	47147.5	-1.34752	0.0565966	-23.8093	2.67846e-125	1.41231e-123	14.6144	14.6893	14.777	14.8018	16.0325	15.9786	16.1189	16.0899
ENSG00000139146.14 SINHCAF	4808.51	-1.75115	0.0735734	-23.8014	3.22724e-125	1.69833e-123	11.2077	11.2817	11.4546	11.4591	12.8651	12.9049	12.9815	12.9938
ENSG00000119714.11 GPR68	1201.75	-1.61214	0.0677457	-23.7969	3.59204e-125	1.8866e-123	9.90762	9.90974	9.89011	10.0264	11.1251	11.1134	11.1384	11.1021
ENSG00000130227.17 XPO7	3066.21	-1.2202	0.0513774	-23.7498	1.10522e-124	5.79341e-123	11.0925	11.1726	11.1311	11.1593	12.1819	12.1802	12.264	12.1856
ENSG00000240303.8 ACAD11	2385.47	1.95319	0.0822536	23.7459	1.21084e-124	6.33466e-123	12.2284	12.0508	11.9339	11.9315	10.3811	10.4713	10.4884	10.3792
ENSG00000110218.9 PANX1	872.352	-2.60939	0.109959	-23.7305	1.74909e-124	9.13278e-123	9.12571	9.15708	9.20877	9.41498	10.8901	10.8367	10.9499	10.9179
ENSG00000137033.11 IL33	647.458	-2.77367	0.11692	-23.7228	2.09626e-124	1.09242e-122	9.01209	8.98343	8.91691	9.02275	10.4356	10.4616	10.6921	10.7198
ENSG00000196155.13 PLEKHG4	1751	1.40022	0.0590445	23.7147	2.5403e-124	1.32125e-122	11.5229	11.4945	11.564	11.5421	10.4235	10.4752	10.3556	10.3886
ENSG00000099995.19 SF3A1	4499.26	-1.56084	0.0658765	-23.6934	4.21311e-124	2.18706e-122	11.2933	11.3454	11.3974	11.5367	12.8552	12.8207	12.7825	12.7539
ENSG00000102753.10 KPNA3	1725.02	-1.99146	0.0840815	-23.6849	5.15715e-124	2.67194e-122	10.0532	9.98942	10.1002	10.1806	11.5447	11.6513	11.5426	11.782
ENSG00000160710.18 ADAR	1521.15	-1.44705	0.0611051	-23.6813	5.61658e-124	2.90436e-122	10.2007	10.2114	10.2329	10.3243	11.3684	11.3686	11.3642	11.3716
ENSG00000115414.21 FN1	27253.3	-1.93847	0.0819556	-23.6528	1.10569e-123	5.70657e-122	13.3237	13.4832	13.6523	13.5814	15.284	15.3541	15.4094	15.5907
ENSG00000143079.15 CTTNBP2NL	873.481	-2.06695	0.087418	-23.6445	1.34463e-123	6.92637e-122	9.36883	9.42342	9.55636	9.48481	10.7571	10.8034	10.8503	10.9022
ENSG00000186919.13 ZACN	395.423	6.91143	0.29244	23.6337	1.73708e-123	8.9308e-122	10.2412	10.1528	10.1454	10.2707	7.96802	8.0152	8.00168	8.06456
ENSG00000063978.16 RNF4	1572.57	-1.50712	0.0637785	-23.6305	1.87207e-123	9.60638e-122	10.2242	10.1698	10.2991	10.2862	11.4364	11.39	11.4694	11.3926
ENSG00000120526.12 NUDCD1	1747.61	-1.87285	0.0792775	-23.6239	2.18815e-123	1.12069e-121	9.99194	10.2059	10.2093	10.216	11.5501	11.6292	11.6727	11.658
ENSG00000078177.14 N4BP2	1026.77	-2.37136	0.10045	-23.6073	3.24567e-123	1.65913e-121	9.41594	9.45831	9.4603	9.47033	10.9073	11.0407	10.9832	11.2778
ENSG00000223764.2 LINC02593	462.892	3.90108	0.165391	23.587	5.23756e-123	2.67225e-121	10.5263	10.4042	10.0593	10.1842	8.52697	8.49062	8.42917	8.54918
ENSG00000109787.13 KLF3	1137.43	-1.71167	0.0726291	-23.5672	8.35919e-123	4.25683e-121	9.79728	9.84122	9.88503	9.83022	11.05	11.0556	11.01	11.1744
ENSG00000110958.16 PTGES3	6465.28	-1.93145	0.0819715	-23.5625	9.35397e-123	4.75437e-121	11.4132	11.6105	11.7235	11.638	13.2465	13.3609	13.3736	13.5325
ENSG00000183793.14 NPIPA5	857.795	2.5496	0.10824	23.555	1.11556e-122	5.65937e-121	11.0459	10.853	10.6925	10.879	9.30337	9.30559	9.16575	9.19939
ENSG00000101266.19 CSNK2A1	4308.22	-1.45481	0.0618161	-23.5345	1.80817e-122	9.1557e-121	11.2893	11.3747	11.4714	11.494	12.6843	12.6905	12.7472	12.7522
ENSG00000196396.10 PTPN1	2128.44	-1.37846	0.0585929	-23.5261	2.20376e-122	1.11377e-120	10.643	10.5701	10.6039	10.7078	11.7729	11.7884	11.7978	11.7268
ENSG00000112339.15 HBS1L	1036.58	-1.63472	0.0695836	-23.4928	4.82684e-122	2.43487e-120	9.72765	9.82121	9.84721	9.77126	10.921	10.9295	10.9748	10.9763
ENSG00000124789.12 NUP153	2878.89	-1.4391	0.0613169	-23.4699	8.29021e-122	4.17409e-120	10.9109	10.8624	10.9814	10.9936	12.1112	12.1752	12.1556	12.2629
ENSG00000163513.19 TGFBR2	2832.51	-1.66227	0.0708574	-23.4593	1.0613e-121	5.33358e-120	10.6689	10.7664	10.8823	10.827	12.1719	12.1915	12.1452	12.3156
ENSG00000283378.1 CNTNAP3C	266.032	-5.2006	0.221711	-23.4567	1.12954e-121	5.66589e-120	8.02124	8.15806	8.08165	8.22441	9.80036	9.84741	9.86035	9.7479
ENSG00000175582.20 RAB6A	2913.84	-1.56909	0.0669322	-23.443	1.55818e-121	7.80136e-120	10.7615	10.8547	10.9669	10.911	12.1399	12.2139	12.2582	12.28
ENSG00000173546.7 CSPG4	6829.14	-1.46916	0.0626779	-23.4399	1.67612e-121	8.37622e-120	11.8873	11.9199	11.9809	12.1303	13.3343	13.3558	13.3313	13.3909
ENSG00000155090.15 KLF10	2101.5	-1.5281	0.0652068	-23.4347	1.89482e-121	9.45154e-120	10.4578	10.5404	10.5439	10.5996	11.7524	11.7225	11.8059	11.877
ENSG00000184209.15 SNRNP35	598.235	2.00517	0.0855801	23.4303	2.09899e-121	1.04505e-119	10.4349	10.3413	10.388	10.4611	9.22234	9.17749	9.23891	9.22058
ENSG00000164171.11 ITGA2	12165.2	-2.1776	0.092952	-23.4272	2.26006e-121	1.12315e-119	12.1534	12.1277	12.328	12.3292	14.1582	14.2684	14.1959	14.5893
ENSG00000145332.14 KLHL8	598.193	-2.1299	0.0909383	-23.4213	2.59224e-121	1.28585e-119	9.1167	9.24911	9.15717	9.1487	10.382	10.4136	10.4026	10.4965
ENSG00000085982.14 USP40	881.897	1.89219	0.0808279	23.4102	3.36668e-121	1.66691e-119	10.9124	10.7388	10.7455	10.844	9.53553	9.50734	9.57194	9.55896
ENSG00000102125.16 TAZ	1864.46	1.85732	0.0793518	23.4061	3.70423e-121	1.83066e-119	11.8634	11.6738	11.6149	11.6631	10.3082	10.2054	10.2593	10.1481
ENSG00000125266.8 EFNB2	1380.15	-1.8434	0.078803	-23.3926	5.0883e-121	2.51004e-119	10.0336	9.84122	9.90521	10.0048	11.2406	11.3247	11.3687	11.3855
ENSG00000178607.17 ERN1	839.915	-2.09836	0.0897479	-23.3805	6.7421e-121	3.31974e-119	9.43427	9.44597	9.3348	9.45146	10.7402	10.8307	10.6816	10.8964
ENSG00000109929.10 SC5D	2295.49	-2.26488	0.0968732	-23.3798	6.85596e-121	3.36961e-119	10.2303	10.0615	10.2251	10.3157	11.9022	12.0373	11.9514	12.2604
ENSG00000138709.19 LARP1B	821.483	-1.80971	0.0774984	-23.3516	1.32678e-120	6.50899e-119	9.4723	9.60385	9.49086	9.51925	10.6936	10.6833	10.7411	10.7553
ENSG00000100505.13 TRIM9	2068.12	-1.56445	0.0670024	-23.3491	1.40775e-120	6.89358e-119	10.4019	10.4924	10.4758	10.6171	11.7726	11.7578	11.7689	11.8141
ENSG00000010295.20 IFFO1	1070.62	2.01297	0.0862465	23.3397	1.7519e-120	8.5632e-119	11.1931	11.0336	11.0365	10.9505	9.71286	9.67295	9.61007	9.58036
ENSG00000116954.8 RRAGC	883.176	-1.81853	0.0779231	-23.3376	1.84392e-120	8.99658e-119	9.50916	9.64033	9.58031	9.57201	10.8101	10.7204	10.8335	10.8382
ENSG00000072415.10 MPP5	1290.95	-2.13775	0.0917546	-23.2986	4.58137e-120	2.23121e-118	9.70417	9.66337	9.80465	9.80028	11.2118	11.281	11.2065	11.4803
ENSG00000139631.19 CSAD	629.266	2.612	0.112155	23.2892	5.69853e-120	2.77025e-118	10.6857	10.567	10.4725	10.4056	9.07601	9.06289	8.91848	9.02863
ENSG00000002016.18 RAD52	746.333	1.97874	0.0849858	23.2832	6.56407e-120	3.18524e-118	10.7151	10.5383	10.6334	10.6674	9.40794	9.38056	9.4089	9.3209
ENSG00000103888.17 CEMIP	10868.2	-1.90479	0.0818289	-23.2777	7.46701e-120	3.61684e-118	12.2836	12.1575	12.1904	12.501	14.0304	14.0471	14.085	14.2372
ENSG00000197324.9 LRP10	5274.66	-1.33452	0.0573706	-23.2614	1.09041e-119	5.27217e-118	11.6405	11.7	11.7564	11.8477	12.9722	12.9644	12.9378	12.9765
ENSG00000119899.13 SLC17A5	314.338	-3.3556	0.144305	-23.2535	1.30979e-119	6.32144e-118	8.53746	8.39568	8.58717	8.41858	9.86121	9.91106	9.88892	9.95463
ENSG00000175455.16 CCDC14	3123.34	1.98344	0.0853064	23.2507	1.39808e-119	6.73543e-118	12.613	12.3823	12.3105	12.2778	10.6214	10.755	10.6509	10.7799
ENSG00000159131.17 GART	3777.43	-1.29471	0.0556968	-23.2457	1.57113e-119	7.55551e-118	11.2732	11.3562	11.4194	11.3349	12.489	12.5057	12.5613	12.4429
ENSG00000188818.12 ZDHHC11	460.001	3.64871	0.157002	23.2399	1.79794e-119	8.63076e-118	10.4934	10.2856	10.1385	10.2043	8.6677	8.56892	8.5413	8.44298
ENSG00000139641.13 ESYT1	1658.6	-1.39384	0.0599882	-23.2352	2.007e-119	9.61709e-118	10.4401	10.3338	10.3139	10.3446	11.4765	11.4495	11.4446	11.4774
ENSG00000100320.23 RBFOX2	2866.16	-1.50287	0.0647329	-23.2165	3.10095e-119	1.48325e-117	10.8	10.8868	10.9002	10.989	12.1471	12.1279	12.2028	12.2657
ENSG00000178028.14 DMAP1	971.732	1.58246	0.0682541	23.1849	6.47387e-119	3.09107e-117	10.8815	10.8401	10.8985	10.8433	9.72866	9.80638	9.77681	9.7275
ENSG00000108773.11 KAT2A	4021.59	2.2918	0.0988853	23.1763	7.89057e-119	3.7608e-117	13.016	12.727	12.677	12.7353	10.9066	10.873	10.7915	10.5705
ENSG00000185201.17 IFITM2	8586.6	1.53054	0.0660877	23.1592	1.1739e-118	5.58511e-117	13.5781	13.6974	13.6678	13.7964	12.3297	12.258	12.2561	12.1122
ENSG00000183337.18 BCOR	1239.58	-1.6816	0.0726484	-23.1471	1.55405e-118	7.38063e-117	9.95346	9.83035	9.93489	9.99526	11.1689	11.2052	11.0977	11.2072
ENSG00000101193.8 GID8	2903.09	-1.19462	0.0516369	-23.135	2.06075e-118	9.76977e-117	11.0164	11.1155	11.1132	11.11	12.1542	12.1081	12.1301	12.1049
ENSG00000163399.16 ATP1A1	11965.4	-1.34968	0.0583444	-23.1329	2.16112e-118	1.02275e-116	12.6699	12.7891	12.8934	12.8699	14.1152	14.093	14.1402	14.0701
ENSG00000206530.11 CFAP44	293.081	3.98513	0.1724	23.1156	3.22298e-118	1.52259e-116	9.90762	9.98781	9.72465	9.84877	8.31429	8.39504	8.22488	8.38952
ENSG00000131725.14 WDR44	701.842	-1.95798	0.0847753	-23.0961	5.06816e-118	2.39007e-116	9.34454	9.30649	9.35581	9.36374	10.4889	10.5591	10.5646	10.663
ENSG00000188848.16 BEND4	1283.32	-2.34588	0.101581	-23.0936	5.36704e-118	2.52657e-116	9.66717	9.48741	9.6454	9.74156	11.2417	11.3172	11.213	11.5016
ENSG00000112096.19 SOD2	6115.55	-1.38537	0.0600137	-23.0842	6.67569e-118	3.13711e-116	11.781	11.8759	11.9753	11.9404	13.116	13.1896	13.1577	13.25
ENSG00000057704.13 TMCC3	545.163	-2.04833	0.0887534	-23.0788	7.5529e-118	3.54312e-116	9.13168	9.1442	9.10949	9.16242	10.2991	10.2892	10.3936	10.2861
ENSG00000172893.16 DHCR7	2264.84	-1.42527	0.0617735	-23.0725	8.75587e-118	4.10026e-116	10.5999	10.6877	10.7073	10.7029	11.8999	11.8613	11.9137	11.7699
ENSG00000196821.10 ILRUN	2355.99	-1.42563	0.0618007	-23.0681	9.67456e-118	4.52256e-116	10.6627	10.6387	10.759	10.8059	11.8864	11.9265	11.9407	11.8989
ENSG00000136068.15 FLNB	7867	-1.04923	0.0455024	-23.0588	1.20164e-117	5.60753e-116	12.441	12.3998	12.4257	12.4875	13.4422	13.3829	13.4179	13.4767
ENSG00000101752.12 MIB1	3217.17	-2.39417	0.103908	-23.0412	1.80308e-117	8.39952e-116	10.5154	10.3792	10.478	10.5495	12.3565	12.4756	12.3389	12.8161
ENSG00000166025.18 AMOTL1	2615.65	-1.84077	0.0798978	-23.039	1.89433e-117	8.80927e-116	10.5233	10.4565	10.6402	10.7391	12.0925	12.1393	12.0968	12.2288
ENSG00000116209.12 TMEM59	2716.79	-1.47696	0.0641204	-23.0341	2.12268e-117	9.85409e-116	10.7203	10.8843	10.9193	10.8674	12.0933	12.0905	12.1697	12.0865
ENSG00000082196.21 C1QTNF3	244.021	3.41993	0.148485	23.0322	2.21753e-117	1.02766e-115	9.72407	9.67577	9.63719	9.70773	8.36999	8.43503	8.36009	8.39647
ENSG00000165959.12 CLMN	2926.97	-1.96315	0.0852353	-23.0321	2.22174e-117	1.02783e-115	10.7894	10.6175	10.4483	10.698	12.3947	12.3352	12.2428	12.2707
ENSG00000085719.13 CPNE3	2094.2	-2.05161	0.0891317	-23.0177	3.09911e-117	1.43126e-115	10.0684	10.3036	10.3212	10.2561	11.7539	11.8895	11.878	12.0278
ENSG00000165282.14 PIGO	1284.17	-1.50117	0.0652662	-23.0008	4.57528e-117	2.10936e-115	9.98169	10.0902	10.0171	10.1108	11.1884	11.1582	11.1817	11.1727
ENSG00000082212.13 ME2	1396.38	-1.47996	0.0643572	-22.9961	5.10107e-117	2.34772e-115	10.1197	10.0961	10.2277	10.1221	11.2458	11.2495	11.2838	11.3051
ENSG00000117139.18 KDM5B	3097.58	-1.3125	0.057103	-22.9848	6.61057e-117	3.03723e-115	11.0411	11.0612	11.0993	11.1844	12.214	12.2039	12.2505	12.296
ENSG00000139496.16 NUP58	1891.13	-1.70582	0.074251	-22.9737	8.54653e-117	3.91999e-115	10.2969	10.2714	10.3681	10.3728	11.5937	11.6458	11.6955	11.8344
ENSG00000135677.11 GNS	1780.36	-1.66965	0.0726907	-22.9693	9.46042e-117	4.33174e-115	10.155	10.2648	10.3751	10.3403	11.605	11.6267	11.5601	11.6525
ENSG00000153310.19 CYRIB	1736.6	-1.50127	0.0653693	-22.966	1.01895e-116	4.65761e-115	10.2497	10.3363	10.4281	10.3811	11.5346	11.5076	11.5551	11.5773
ENSG00000088538.13 DOCK3	2749.02	1.94533	0.0847202	22.9618	1.12286e-116	5.12384e-115	12.4024	12.2323	12.0819	12.168	10.6782	10.5682	10.4641	10.6232
ENSG00000245849.8 RAD51-AS1	429.094	3.24298	0.141237	22.9613	1.13589e-116	5.17448e-115	10.3792	10.1949	10.1016	10.079	8.67197	8.70883	8.5413	8.60696
ENSG00000058262.10 SEC61A1	10553.7	-1.08835	0.0474012	-22.9605	1.15866e-116	5.26927e-115	12.7787	12.7603	12.8189	12.8779	13.8856	13.85	13.874	13.7974
ENSG00000185033.14 SEMA4B	25486.8	-1.21162	0.0528283	-22.9352	2.07261e-116	9.40966e-115	14.0117	13.8631	13.907	14.0044	15.1876	15.1271	15.1654	15.0655
ENSG00000223745.8 CCDC18-AS1	969.518	2.25358	0.0982942	22.9269	2.50397e-116	1.13488e-114	11.1408	11.0283	10.8275	10.8862	9.43617	9.50938	9.48671	9.40421
ENSG00000112769.20 LAMA4	5007.84	-1.31642	0.057439	-22.9186	3.02891e-116	1.37048e-114	11.67	11.626	11.6232	11.8071	12.8807	12.8613	12.9008	12.9056
ENSG00000182768.9 NGRN	6212.75	-1.71798	0.074963	-22.9176	3.09924e-116	1.39994e-114	11.5186	11.6934	11.7149	11.8379	13.3166	13.2211	13.3681	13.2159
ENSG00000152409.9 JMY	1492.59	-2.39081	0.104388	-22.9032	4.31901e-116	1.94762e-114	9.70781	9.71621	9.71114	9.83798	11.3774	11.5225	11.361	11.7613
ENSG00000181104.7 F2R	2855.5	-1.56694	0.068426	-22.8998	4.66747e-116	2.10122e-114	10.7448	10.8068	10.9615	10.8926	12.1388	12.2096	12.1656	12.2698
ENSG00000134308.14 YWHAQ	3874.1	-1.76719	0.0771722	-22.8993	4.72655e-116	2.12425e-114	10.9257	11.0868	11.2172	11.0965	12.5403	12.6147	12.6897	12.7377
ENSG00000173039.19 RELA	4154.4	-1.17222	0.0512134	-22.8889	5.99327e-116	2.68904e-114	11.5176	11.5193	11.5421	11.5707	12.6498	12.6082	12.6022	12.5123
ENSG00000114439.19 BBX	2706.14	-2.02566	0.088542	-22.878	7.70069e-116	3.44934e-114	10.5272	10.3804	10.5103	10.6531	12.0927	12.223	12.1523	12.394
ENSG00000150403.18 TMCO3	1066.65	-1.55425	0.0679663	-22.8679	9.6946e-116	4.33522e-114	9.87294	9.81754	9.8507	9.87461	11.0116	10.9062	11.0051	10.9467
ENSG00000213599.10 SLX1A-SULT1A3	1057.38	2.22958	0.0975206	22.8626	1.09486e-115	4.88783e-114	11.2052	11.0046	11.038	11.0412	9.53919	9.67828	9.48671	9.42852
ENSG00000170525.21 PFKFB3	5519.35	-1.05754	0.0462672	-22.8572	1.23888e-115	5.52158e-114	11.9672	11.9527	11.9385	12.0106	12.9017	12.9346	12.9972	12.9454
ENSG00000140945.17 CDH13	1023.38	-1.97706	0.0865089	-22.8538	1.33995e-115	5.96209e-114	9.4723	9.61253	9.69551	9.70601	10.9839	10.9966	11.0158	10.9926
ENSG00000184588.18 PDE4B	3215.11	-1.48108	0.0648241	-22.8477	1.54135e-115	6.84689e-114	10.9857	10.9514	11.0597	11.1604	12.2746	12.326	12.3529	12.378
ENSG00000120742.11 SERP1	5888.98	-1.76368	0.0772081	-22.8432	1.70793e-115	7.57429e-114	11.3799	11.6623	11.6754	11.6531	13.1195	13.2877	13.2271	13.2326
ENSG00000128159.12 TUBGCP6	1611.29	1.91103	0.0837435	22.82	2.90271e-115	1.28516e-113	11.6564	11.5289	11.498	11.4442	10.1104	10.167	9.97281	9.97601
ENSG00000117481.10 NSUN4	1645.73	-1.32034	0.0578942	-22.8062	3.98182e-115	1.76002e-113	10.3448	10.3719	10.4449	10.3924	11.4432	11.4334	11.4616	11.4002
ENSG00000154065.17 ANKRD29	2112.9	1.44142	0.0632184	22.8007	4.51668e-115	1.99314e-113	11.8779	11.7395	11.723	11.7642	10.5872	10.6545	10.5451	10.5705
ENSG00000113369.9 ARRDC3	3844.16	-1.42253	0.0624143	-22.7918	5.52925e-115	2.43596e-113	11.1857	11.276	11.3039	11.3891	12.4979	12.5906	12.5229	12.6142
ENSG00000204371.11 EHMT2	2610.3	1.16018	0.0509049	22.7912	5.60818e-115	2.46668e-113	11.9346	11.9503	12.003	12.0171	10.9745	11.006	10.9611	10.9939
ENSG00000070756.17 PABPC1	46779.1	-1.22644	0.0538129	-22.7908	5.65495e-115	2.48317e-113	14.7054	14.7292	14.829	14.9106	16.0205	16.0079	16.0195	15.9909
ENSG00000113108.20 APBB3	1120.02	2.01552	0.0884386	22.79	5.76214e-115	2.5261e-113	11.1814	11.1325	11.0358	11.0848	9.7566	9.74899	9.67634	9.53318
ENSG00000239306.5 RBM14	1688.58	-1.51625	0.0665563	-22.7815	6.99075e-115	3.05971e-113	10.2864	10.2424	10.3442	10.3759	11.5501	11.5331	11.5414	11.4218
ENSG00000267002.4 AC060780.1	644.784	2.14562	0.0941907	22.7795	7.3238e-115	3.20025e-113	10.5184	10.5468	10.4269	10.5321	9.23902	9.30074	9.11649	9.17504
ENSG00000238113.7 LINC01410	481.207	2.81792	0.123713	22.7779	7.59954e-115	3.31533e-113	10.4536	10.2985	10.1607	10.1711	8.84827	8.79301	8.76644	8.83073
ENSG00000112276.14 BVES	667.479	-2.18263	0.095838	-22.7742	8.26716e-115	3.60072e-113	9.24989	9.2343	9.13201	9.26138	10.4862	10.5591	10.4763	10.6638
ENSG00000084093.19 REST	2140.71	-2.13914	0.0939415	-22.771	8.8917e-115	3.86645e-113	10.1421	10.1428	10.2198	10.3382	11.8061	11.893	11.8594	12.1516
ENSG00000070961.16 ATP2B1	2041.74	-1.83553	0.0806277	-22.7655	1.00793e-114	4.37577e-113	10.3649	10.2972	10.355	10.3243	11.7034	11.8154	11.7284	12.0064
ENSG00000196187.12 TMEM63A	2451.26	1.92686	0.0846461	22.7637	1.04941e-114	4.54844e-113	12.2542	12.079	11.9206	12.0142	10.5307	10.5416	10.3858	10.4306
ENSG00000157985.19 AGAP1	4487.95	-1.54231	0.0677567	-22.7625	1.07864e-114	4.6676e-113	11.4407	11.3314	11.3249	11.5135	12.8191	12.7759	12.6935	12.8876
ENSG00000160949.17 TONSL	1272.93	1.57397	0.0691889	22.7489	1.47014e-114	6.35148e-113	11.1765	11.1719	11.2421	11.1289	9.9593	10.0801	9.95324	10.03
ENSG00000185787.15 MORF4L1	5114.43	-1.76566	0.0776207	-22.7473	1.52483e-114	6.57715e-113	11.2511	11.3441	11.5745	11.4926	12.9733	12.9862	13.0793	13.0575
ENSG00000154529.15 CNTNAP3B	3359.59	1.91473	0.0842658	22.7226	2.68092e-114	1.15452e-112	12.5729	12.4296	12.5055	12.4326	10.7874	10.7684	10.6983	11.0318
ENSG00000213903.9 LTB4R	1098.6	2.89484	0.127479	22.7084	3.69752e-114	1.58975e-112	11.4886	11.1568	11.0159	11.0904	9.34505	9.35997	9.15885	9.21268
ENSG00000100852.13 ARHGAP5	1864.47	-2.35642	0.103776	-22.7069	3.83264e-114	1.64521e-112	9.88724	9.93012	10.0017	10.0211	11.6094	11.8105	11.6496	12.0485
ENSG00000085117.12 CD82	1349.24	-1.4899	0.0656362	-22.6993	4.55263e-114	1.95115e-112	10.0808	10.1211	10.077	10.1345	11.2458	11.1831	11.3122	11.1839
ENSG00000105255.11 FSD1	1397.57	1.42515	0.0627964	22.6947	5.05203e-114	2.16172e-112	11.3069	11.238	11.2813	11.2125	10.2248	10.1473	10.1725	10.1344
ENSG00000186951.16 PPARA	939.462	-2.01236	0.0887165	-22.6831	6.58476e-114	2.81307e-112	9.61737	9.39527	9.51839	9.61338	10.8801	10.8976	10.8797	10.9585
ENSG00000122642.11 FKBP9	2011.54	-1.37791	0.06075	-22.6817	6.79121e-114	2.89664e-112	10.5194	10.5522	10.6009	10.6101	11.6508	11.6598	11.7805	11.7045
ENSG00000041982.16 TNC	3477.78	-1.56987	0.06922	-22.6794	7.15732e-114	3.04795e-112	10.999	11.0788	11.1379	11.1033	12.3688	12.3922	12.4585	12.604
ENSG00000109814.12 UGDH	825.513	-1.87344	0.0826252	-22.674	8.0947e-114	3.44166e-112	9.45679	9.4385	9.52066	9.57201	10.6997	10.6723	10.8079	10.7577
ENSG00000151135.10 TMEM263	1345.25	-2.4598	0.108532	-22.6642	1.01084e-113	4.29103e-112	9.51342	9.69413	9.65152	9.62991	11.2333	11.2903	11.3751	11.647
ENSG00000148824.19 MTG1	873.521	1.85268	0.0817553	22.6613	1.08018e-113	4.57812e-112	10.853	10.736	10.8435	10.7407	9.50582	9.59008	9.62175	9.49241
ENSG00000064999.15 ANKS1A	1577.36	-1.56736	0.0692026	-22.6489	1.43012e-113	6.04213e-112	10.2923	10.1094	10.1933	10.2684	11.4369	11.4544	11.3911	11.4741
ENSG00000163681.16 SLMAP	1756.45	-1.59897	0.0705981	-22.649	1.42866e-113	6.04213e-112	10.2759	10.2437	10.3574	10.3593	11.5371	11.5294	11.5465	11.6987
ENSG00000141837.22 CACNA1A	1871.52	2.05875	0.0910316	22.6158	3.02879e-113	1.27763e-111	11.936	11.7735	11.5865	11.6738	10.17	10.1851	10.0145	10.123
ENSG00000176809.10 LRRC37A3	353.648	2.85447	0.126244	22.6107	3.39741e-113	1.43087e-111	9.99631	10.0259	9.85937	10.0305	8.70128	8.69994	8.63192	8.58647
ENSG00000115875.19 SRSF7	4564.17	1.23824	0.0547649	22.6101	3.4502e-113	1.45082e-111	12.8061	12.7166	12.7584	12.6734	11.6213	11.6159	11.6785	11.5438
ENSG00000068796.19 KIF2A	3366.83	-1.56591	0.0692673	-22.6067	3.72123e-113	1.56233e-111	10.9849	11.0085	11.0661	11.1161	12.3243	12.405	12.3571	12.5608
ENSG00000184216.14 IRAK1	5587.51	-1.22211	0.0540601	-22.6066	3.73565e-113	1.56593e-111	11.7922	11.8642	11.9408	11.9277	13.0608	13.0036	13.0183	12.957
ENSG00000129534.14 MIS18BP1	1115.64	-1.86765	0.082641	-22.5996	4.3747e-113	1.83095e-111	9.67652	9.734	9.75875	9.8177	10.9882	11.0427	11.0725	11.2072
ENSG00000198814.13 GK	488.888	-2.30401	0.101962	-22.5969	4.65177e-113	1.94387e-111	8.94657	8.96045	8.95549	9.06246	10.1756	10.1971	10.3097	10.2737
ENSG00000258301.3 VASH1-AS1	283.676	3.63622	0.161053	22.5779	7.15297e-113	2.98441e-111	9.86653	9.83398	9.80465	9.80028	8.44458	8.46033	8.42096	8.22788
ENSG00000266714.9 MYO15B	1617.76	2.84179	0.125957	22.5617	1.03136e-112	4.29642e-111	11.9573	11.5938	11.5069	11.5808	9.72078	9.66938	9.51748	9.41753
ENSG00000140939.14 NOL3	1428.9	1.49523	0.0662764	22.5606	1.05699e-112	4.39634e-111	11.3778	11.2465	11.2801	11.3028	10.2205	10.1386	10.1603	10.1065
ENSG00000205730.7 ITPRIPL2	1951.41	-1.97943	0.0877414	-22.5598	1.07657e-112	4.47086e-111	10.1982	10.1182	10.2198	10.2972	11.7004	11.7369	11.7011	11.9908
ENSG00000170027.7 YWHAG	4078.78	-1.61673	0.0716685	-22.5584	1.11022e-112	4.60347e-111	11.0892	11.217	11.3391	11.3081	12.6103	12.6683	12.6747	12.7768
ENSG00000136754.18 ABI1	1513.15	-1.5247	0.0676245	-22.5466	1.4517e-112	6.01008e-111	10.1524	10.1241	10.2329	10.2785	11.346	11.3696	11.3629	11.4361
ENSG00000157778.9 PSMG3	2495.4	1.25427	0.0556437	22.541	1.64392e-112	6.79537e-111	11.9573	11.9483	11.9509	11.9177	10.8954	10.873	10.949	10.7993
ENSG00000188636.4 RTL6	1190.06	-1.65672	0.0735505	-22.5249	2.36824e-112	9.77437e-111	9.82576	9.85379	9.92835	10.0035	11.1001	11.1372	11.086	11.1439
ENSG00000025796.14 SEC63	2590.41	-1.71996	0.0763695	-22.5215	2.55575e-112	1.0532e-110	10.6166	10.6084	10.5869	10.7952	12.0428	12.0534	12.0742	12.2333
ENSG00000135750.15 KCNK1	432.711	-2.3288	0.103414	-22.5192	2.69359e-112	1.1066e-110	8.95013	8.90873	8.88488	8.88242	10.1022	10.0723	10.2159	10.0936
ENSG00000176871.9 WSB2	1454.35	-1.30061	0.0577554	-22.5192	2.69047e-112	1.1066e-110	10.264	10.2517	10.3016	10.2707	11.2704	11.3054	11.2994	11.2399
ENSG00000083520.15 DIS3	1879.25	-1.46773	0.065189	-22.515	2.95865e-112	1.21364e-110	10.4722	10.4195	10.4758	10.4326	11.5485	11.5879	11.6696	11.728
ENSG00000139343.10 SNRPF	2216.4	1.54057	0.0684455	22.508	3.46808e-112	1.42043e-110	11.7631	11.9044	11.8824	11.8911	10.6214	10.4752	10.6626	10.5841
ENSG00000154124.5 OTULIN	2067.75	-1.36349	0.0606055	-22.4977	4.36861e-112	1.78653e-110	10.5802	10.6053	10.6353	10.6171	11.709	11.7329	11.6539	11.8224
ENSG00000167881.15 SRP68	2846.68	-1.27166	0.0565287	-22.4959	4.5568e-112	1.86065e-110	10.98	11.0283	11.0048	11.0729	12.146	12.0874	12.1883	12.0539
ENSG00000171302.17 CANT1	645.577	-2.01383	0.0895468	-22.4891	5.30285e-112	2.16198e-110	9.22014	9.20099	9.29159	9.32907	10.4291	10.4645	10.5635	10.4965
ENSG00000131236.18 CAP1	9975.52	-1.56936	0.0698433	-22.4697	8.2105e-112	3.34235e-110	12.2464	12.3758	12.5296	12.4847	13.9011	13.8954	13.9923	13.8322
ENSG00000066855.16 MTFR1	1560.02	-1.95408	0.087047	-22.4486	1.32167e-111	5.37212e-110	9.84059	10.0431	10.0622	10.0699	11.4459	11.4221	11.5132	11.6156
ENSG00000255282.6 WTAPP1	329.706	-3.39138	0.151089	-22.4462	1.39283e-111	5.65277e-110	8.4894	8.46342	8.53299	8.50432	10.0868	9.96181	9.9675	9.76465
ENSG00000104695.13 PPP2CB	1291.7	-1.68217	0.0749544	-22.4426	1.51104e-111	6.12324e-110	9.86974	9.93852	9.99232	10.0621	11.165	11.2	11.2365	11.2756
ENSG00000165475.15 CRYL1	1039.45	-1.68917	0.0752698	-22.4416	1.54632e-111	6.25675e-110	9.78708	9.74183	9.81899	9.72814	10.9689	10.9483	11.0558	10.8797
ENSG00000158106.14 RHPN1	1055.21	2.81474	0.125472	22.4333	1.86476e-111	7.53387e-110	11.2859	11.1034	11.0972	11.0779	9.38527	9.41411	9.20626	9.07474
ENSG00000134769.22 DTNA	1281.12	-1.87695	0.0836705	-22.4326	1.89169e-111	7.63115e-110	9.75771	9.88556	9.81363	9.98976	11.28	11.2224	11.3089	11.1715
ENSG00000147324.11 MFHAS1	1515.76	-1.70185	0.0759037	-22.4212	2.44406e-111	9.84458e-110	10.0448	10.0615	10.2185	10.1083	11.3556	11.4081	11.379	11.5236
ENSG00000111647.13 UHRF1BP1L	885.961	-2.40761	0.107413	-22.4146	2.83517e-111	1.14028e-109	9.15521	9.33412	9.36875	9.43229	10.7896	10.9161	10.8587	10.998
ENSG00000084092.7 NOA1	1634.6	-1.3583	0.0605994	-22.4143	2.85297e-111	1.14572e-109	10.2794	10.3792	10.4007	10.3873	11.445	11.4006	11.4628	11.4332
ENSG00000168096.15 ANKS3	612.199	1.91929	0.0856401	22.4111	3.06936e-111	1.23078e-109	10.4296	10.4007	10.4348	10.4096	9.31449	9.27367	9.28308	9.1723
ENSG00000110713.17 NUP98	5182.34	-1.04503	0.0466399	-22.4063	3.41859e-111	1.36876e-109	11.8676	11.8617	11.8892	11.9553	12.8463	12.8463	12.8337	12.8942
ENSG00000255031.5 AP002807.1	240.538	3.92373	0.175119	22.4061	3.43186e-111	1.37203e-109	9.81411	9.66959	9.64335	9.65162	8.34285	8.32942	8.20019	8.28196
ENSG00000156642.17 NPTN	2155.76	-1.65702	0.0740067	-22.3902	4.90714e-111	1.95891e-109	10.3901	10.437	10.4867	10.6395	11.8449	11.7988	11.8776	11.8846
ENSG00000155380.13 SLC16A1	1769.5	-1.78931	0.0799829	-22.3712	7.51295e-111	2.99467e-109	10.1856	10.0887	10.3163	10.2617	11.5671	11.6094	11.5836	11.7451
ENSG00000174579.4 MSL2	957.148	-1.6142	0.0721805	-22.3634	8.9479e-111	3.56134e-109	9.76294	9.72613	9.73802	9.70429	10.8449	10.842	10.7934	10.9362
ENSG00000123908.12 AGO2	9056.7	-2.06325	0.0922687	-22.3614	9.36371e-111	3.72131e-109	12.0603	11.828	11.8147	12.0261	13.8532	13.875	13.6565	14.0916
ENSG00000119537.18 KDSR	2980.81	-1.41388	0.0632591	-22.3506	1.19214e-110	4.73075e-109	10.8959	10.9992	11.0329	11.0412	12.1553	12.2059	12.185	12.3154
ENSG00000122861.16 PLAU	12052.4	-1.09845	0.0491695	-22.34	1.51187e-110	5.99069e-109	12.9934	12.9457	12.9881	13.0084	13.9837	13.99	14.1275	14.0608
ENSG00000116212.15 LRRC42	1104.99	-1.89863	0.0850497	-22.3237	2.17336e-110	8.59907e-109	9.68025	9.65922	9.77547	9.77939	11.115	10.9993	11.1927	10.979
ENSG00000164251.5 F2RL1	7309.45	-1.59023	0.0712412	-22.3218	2.2684e-110	8.96184e-109	11.797	12.0073	12.1125	12.0255	13.4402	13.4436	13.5474	13.4757
ENSG00000152558.15 TMEM123	8598.48	-2.09361	0.0938599	-22.3057	3.25118e-110	1.28256e-108	11.6626	11.8107	11.9335	11.9657	13.6426	13.7368	13.7785	14.0503
ENSG00000198910.14 L1CAM	1780.62	-1.4055	0.0630212	-22.302	3.53472e-110	1.39237e-108	10.4422	10.3499	10.4494	10.463	11.6173	11.5777	11.4956	11.518
ENSG00000105355.9 PLIN3	3784.35	-1.62708	0.0729609	-22.3008	3.63131e-110	1.42832e-108	11.0032	11.1367	11.285	11.1432	12.6189	12.5798	12.6467	12.4905
ENSG00000116260.17 QSOX1	2776.55	-1.24615	0.0559368	-22.2778	6.06673e-110	2.38275e-108	10.9821	10.9712	11.059	11.0166	12.1325	12.0939	12.0918	11.9998
ENSG00000114850.7 SSR3	5133.07	-1.43484	0.0644306	-22.2695	7.30609e-110	2.86531e-108	11.5069	11.6618	11.7661	11.6151	12.9132	12.9334	12.9963	12.963
ENSG00000153291.16 SLC25A27	294.092	3.30944	0.148665	22.261	8.82401e-110	3.45051e-108	9.97875	9.86977	9.72849	9.77614	8.46191	8.50816	8.49131	8.44298
ENSG00000159873.10 CCDC117	1569.2	-1.86103	0.0836004	-22.2611	8.81556e-110	3.45051e-108	9.93836	10.0086	10.1315	10.1529	11.3896	11.5312	11.4622	11.5768
ENSG00000072134.15 EPN2	4641.75	-1.31704	0.0591999	-22.2473	1.1972e-109	4.67465e-108	11.6943	11.5563	11.4789	11.6133	12.7939	12.7842	12.7494	12.8082
[truncated: 26,115 more rows]

## Sheet: S3 dge KO ut vs KO dNs
Name	baseMean2	log2FoldChange	lfcSE	stat	pvalue	padj	KO_dNs_A	KO_dNs_B	KO_dNs_C	KO_dNs_D	KO_ut_A	KO_ut_B	KO_ut_C	KO_ut_D
[truncated: 26,222 more rows]

[truncated: 6 more sheets: S4 dge KO dNs vs CON ut, S5- dPathway Con ut vs KO ut, S6- dPathway CON ut v CON dNs, S7 - dPathway KO ut v KO dNs, S8- dPathway KO dNs v CON ut, S9- Multi mitch comparison list]
